# Supplementary material for: Palladium-Catalyzed Nondirected Late-Stage C–H Deuteration of Arenes
Source: PubMed Central journal article supplement — J Am Chem Soc. 2021 Sep 28;143(40):16370–6. doi: 10.1021/jacs.1c08233 (PMC8517979; doi:10.1021/jacs.1c08233), 2021-09-28
Supplement: ja1c08233_si_001.pdf [file ja1c08233_si_001.pdf]

# Supporting Information

## Palladium-Catalyzed Nondirected Late-Stage C–H Deuteration of Arenes

Mirxan Farizyan,<sup>†,‡</sup> Arup Mondal,<sup>†,‡</sup> Sourjya Mal,<sup>†,§</sup> Fritz Deufel,<sup>†,§</sup>  
and Manuel van Gemmeren<sup>\*,†</sup>

<sup>†</sup> Organisch-Chemisches Institut, Westfälische Wilhelms-Universität Münster,  
Corrensstraße 36, 48149 Münster, Germany

<sup>‡</sup> These authors contributed equally to this work

<sup>§</sup> These authors contributed equally to this work

\* mvangemmeren@uni-muenster.de

### Contents

|    |                                                                                      |     |
|----|--------------------------------------------------------------------------------------|-----|
| 1  | General Experimental Methods .....                                                   | 2   |
| 2  | Preparation of Starting Materials and Ligands .....                                  | 4   |
| 3  | Optimization of the Reaction Conditions with Electron-Donating Substituents .....    | 23  |
| 4  | Optimization of the Reaction Conditions with Electron-Withdrawing Substituents ..... | 37  |
| 5  | Scope of the Reaction .....                                                          | 55  |
| 6. | References .....                                                                     | 212 |

# 1 General Experimental Methods

## Solvents, Reagents, and Techniques

Unless otherwise noted, all reactions were carried out in oven-dried glassware. Reaction temperatures are reported as the temperature of the metal block surrounding the vessel.

The following solvents were dried by distillation over the drying agents indicated in parentheses: HFIP (activated 3Å molecular sieves), toluene (CaH<sub>2</sub>). Additional anhydrous solvents (<50 ppm water) were purchased from Acros Organics, Sigma-Aldrich, or Carl Roth and stored over molecular sieves under an argon atmosphere. A strong and homogeneous stirring was also found to be crucial for the optimal yield.

Commercially available chemicals were obtained from ABCR, Acros Organics, Aldrich Chemical Co., Alfa Aesar, Combi-Blocks, Carbolution, Fluorochem, and TCI Europe and used as received unless otherwise stated.

## Chromatography

Analytical thin layer chromatography (TLC) was performed on silica gel 60 F254 aluminum plates (Merck). Visualization was achieved by exposure to ultraviolet light (254 nm, 366 nm) and/or by staining. For staining the TLC plates were dipped into a solution of KMnO<sub>4</sub> (1 g KMnO<sub>4</sub>, 6 g K<sub>2</sub>CO<sub>3</sub> and 0.1 g KOH in 100 mL H<sub>2</sub>O) and developed with a heat gun if necessary. Flash column chromatography was performed on silica gel (35-70 μm mesh, 60A, Acros) with a positive argon overpressure.

## Nuclear Magnetic Resonance (NMR) Spectroscopy

<sup>1</sup>H, <sup>13</sup>C, and <sup>19</sup>F NMR spectra were recorded at room temperature on a Bruker Avance II 300 MHz, Bruker Avance II 400 MHz, Agilent DD2 500 or Agilent DD2 600 spectrometer. Chemical shifts (δ) of <sup>1</sup>H and <sup>13</sup>C NMR spectra are given in ppm relative to tetramethylsilane (TMS) using the residual solvent peaks for calibration (CDCl<sub>3</sub>: δ<sub>H</sub> = 7.26 ppm, δ<sub>C</sub> = 77.16 ppm).<sup>[1]</sup> <sup>19</sup>F NMR spectra are reported relative to CCl<sub>3</sub>F. Rather than calibrating with an internal standard, the spectra are referenced to the proton resonance of TMS as the primary reference for the unified chemical shift scale as recommended by the IUPAC since 2001.<sup>[2]</sup> Chemical shifts are generally reported with two (<sup>1</sup>H) or one (all other nuclei) digits after the decimal point. NMR-data are reported as follows: chemical shift (multiplicity [s = singlet, d = doublet, t = triplet, q = quartet, quint = quintet, sept = septet, m = multiplet, br = broad], coupling constants (*J*, Hz) and integration). All spectra were processed using the MestReNova program. The <sup>13</sup>C-NMR spectra of deuterated compounds are reported as observed. Due to the low signal intensity and potentially an overlap of signals, the number of signals can deviate from the hypothetical value and C–D coupling constants could not be determined.

## Mass Spectrometry (MS)

High resolution mass spectra (HRMS) were recorded on a Bruker Daltonics MicroTof or on a Thermo-Fisher Scientific Orbitrap LTQ XL spectrometer using electrospray ionization (ESI) and on a Exactive GC Orbitrap using electron impact ionization (EI).

## Infrared Spectroscopy (IR)

Infrared spectra were recorded neat on a Shimadzu FTIR 8400S or a Varian Associates FTIR 3100 Excalibur spectrometer. The wave numbers (ν) of recorded IR-signals are quoted in cm<sup>-1</sup>.

### **Gas Chromatography with Flame Ionization Detection (GC-FID)**

GC-FID analyses were performed using an Agilent Technologies 7890B setup equipped with an HP5 column (30 m, 0.32mm × 0.25 μm).

### **Gas Chromatography coupled with Mass Spectrometry (GC-MS)**

GC-MS spectra were recorded on an Agilent Technologies 7890A GC-system with an Agilent 5975C VL MSD or an Agilent 5975 inert Mass Selective Detector (EI) and an HP-5MS column (30 m, 0.32mm × 0.25 μm).

### **Determination of Deuteration Degrees by NMR Spectroscopy**

For NMR analysis the decrease of the proton signal intensity was measured and compared with the values obtained from non-deuterated starting materials. The decrease in signal intensities was calibrated relative to positions in which no proton-deuterium exchange was observed. Only positions which undergo H/D exchange to 10% or more are reported as deuterated due to the experimental precision of NMR integration analysis. For comparison, the <sup>1</sup>H and <sup>13</sup>C-spectra of the non-deuterated compounds were recorded and are shown alongside the deuterated samples in the characterization of the respective products. For the optimization studies the degree of deuteration was determined by <sup>1</sup>H-NMR analysis. Additionally, the yield of deuterated material was determined using 1,3,5-trimethoxybenzene or 1,3,5-trimethylbenzene as internal standard.

### **Determination of Deuteration Degrees by Mass Spectrometry**

The determination of deuteration degrees by mass spectrometric analysis was performed by the service department of the University of Münster using the automated program Universal Mass Calculator (UMC Version 3.11.0.70, Dr. Matthias C. Letzel, WWU Münster, Org.-Chem. Institut, Germany. <https://www.uni-muenster.de/Chemie.oc/ms/downloads.html>). For improved readability, the original data are shown explicitly. The diagrams show the measured m/z values and the experimental relative intensities of the isolated compounds (top row) followed by theoretically generated mass diagrams for selected degrees of deuteration considering the natural abundance of isotopes (bottom rows, in selected cases). The degree of deuteration was determined by fitting the experimentally observed pattern with the best possible linear combination of predicted isotopologue spectra.

### **Determination of Yields**

For the determination of yields the mean molecular mass of the compound derived from mass spectrometry was used.

## 2 Preparation of Starting Materials and Ligands

### General Procedure A:<sup>[3]</sup>

To a solution of the corresponding benzoic acid (10.0 mmol, 1.0 equiv.) in CH<sub>2</sub>Cl<sub>2</sub> (40 mL, 0.25 M) SOCl<sub>2</sub> (0.87 mL, 12.0 mmol, 1.2 equiv.) was added slowly at 0 °C. DMF (30 μL, 0.39 mmol, 0.04 equiv.) was added as catalyst and the mixture was stirred for 4 h at 50 °C. Solvent and volatiles were removed under reduced pressure and the product was used in the following step without further purification.

The product from the previous step was dissolved in CH<sub>2</sub>Cl<sub>2</sub> (5 mL) and slowly added to a mixture of ethyl glycinate hydrochloride (1.40 g, 10.0 mmol, 1.0 equiv.) and triethylamine (3.10 mL, 22.0 mmol, 2.2 equiv.) in CH<sub>2</sub>Cl<sub>2</sub> (10 mL) at 0 °C. The reaction mixture was stirred for further 30 min at 0 °C and was then allowed to slowly warm to room temperature overnight. The mixture was washed with 1 M aq. HCl (2 × 20 mL) 1 M aq. HCl, subsequently with sat. aq. NaHCO<sub>3</sub> (2 × 20 mL) and finally with sat NaCl solution (2 × 20 mL). The combined organic phases were dried over Na<sub>2</sub>CO<sub>3</sub> and the solvent was removed under reduced pressure. The product was used in the following step without further purification.

The product from the previous step was dissolved in a mixture of MeOH (20 mL) and aq. NaOH solution (20 wt%, 20 mL) and the resulting mixture was stirred at 80 °C overnight. MeOH was removed under reduced pressure and the solution was washed with CH<sub>2</sub>Cl<sub>2</sub>. The aqueous phase was acidified with conc. aq. HCl to reach a pH value of 1 and extracted with CH<sub>2</sub>Cl<sub>2</sub>. (2 × 20 mL) The extracts were concentrated and the crude product was purified via flash column chromatography.

### General Procedure B:<sup>[4,5]</sup>

DMAP (489 mg, 4.00 mmol, 2.0 equiv.) was added to a suspension of EDC·HCl (499 mg, 2.40 mmol, 1.2 equiv.) in CH<sub>2</sub>Cl<sub>2</sub> (5 mL, 0.4 M). The mixture was stirred at room temperature until all the solids dissolved. The mixture was cooled to 0 °C, the corresponding acid (2.00 mmol, 1.0 equiv.) was added, followed by the corresponding sulfonamide (2.20 mmol, 1.1 equiv.) and the mixture was stirred at rt for 24 h. The aqueous phase was acidified with conc. aq. HCl to reach a pH value of 1 and extracted with CH<sub>2</sub>Cl<sub>2</sub> (4 × 20 mL). The combined organic phases were dried over Na<sub>2</sub>SO<sub>4</sub>, filtered, and concentrated under reduced pressure. The crude product was purified via flash column chromatography.



**(2,4,6-trimethylbenzoyl)glycine (L2)**

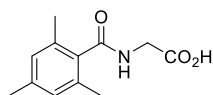

Following the general procedure A using 2,4,6-trimethylbenzoic acid (1.64 g, 10.0 mmol) and purification via silica gel column chromatography using pentane:EtOAc = 1:1 as the eluent, the target compound **L2** was obtained as colorless solid (1.68 g, 7.60 mmol, 76%).

**<sup>1</sup>H NMR (400 MHz, CD<sub>3</sub>OD)** δ = 6.87 (s, 2H), 4.07 (s, 2H), 2.30 (s, 6H), 2.26 (s, 3H) ppm.

**<sup>13</sup>C NMR (101 MHz, CD<sub>3</sub>OD)** δ = 174.0, 172.7, 139.8, 135.7, 135.6, 129.0, 41.7, 21.2, 19.2 ppm.

**HRMS (ESI<sup>neg</sup>) m/z:** Calcd for C<sub>12</sub>H<sub>14</sub>NO<sub>3</sub> 220.09682, Found 220.09760.

**IR (cm<sup>-1</sup>):** 2460, 2240, 2209, 2071, 1122, 1089, 1068, 973, 820.

### <sup>1</sup>H-NMR spectrum in CD<sub>3</sub>OD:

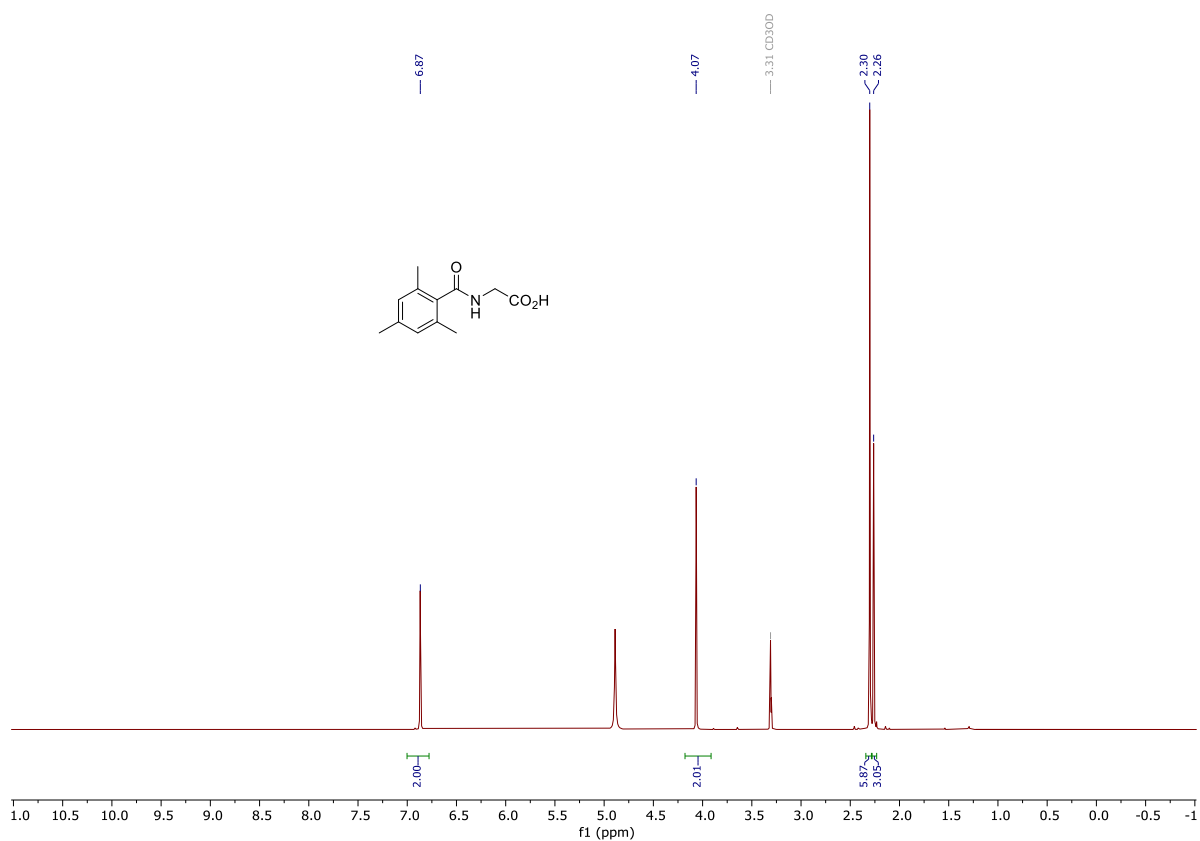

### <sup>13</sup>C-NMR spectrum in CD<sub>3</sub>OD:

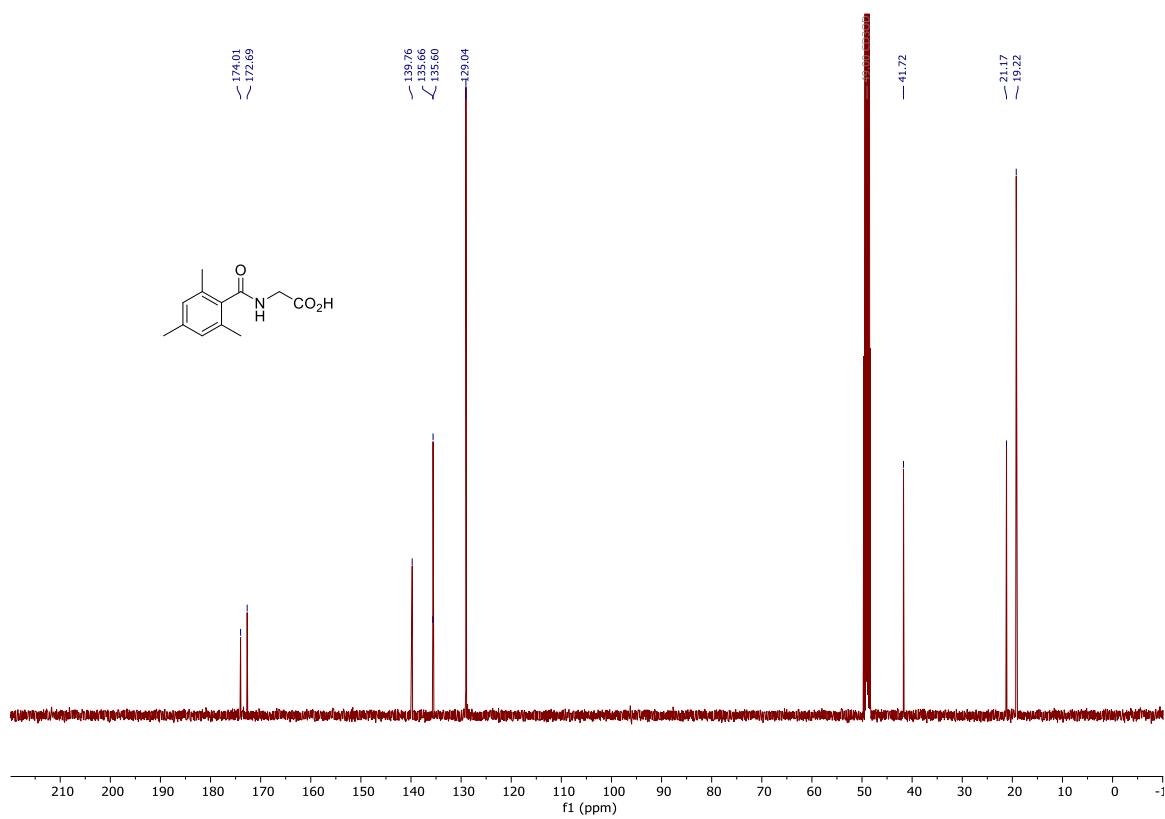

**(2,4,6-triisopropylbenzoyl)glycine (L3)**

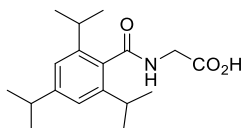

Following the general procedure A using 2,4,6-triisopropylbenzoic acid (2.48 g, 10.0 mmol), and purification via silica gel column chromatography using pentane:EtOAc = 1:1 as the eluent, the target compound **L3** was obtained as colorless solid (2.02 g, 6.60 mmol, 66%).

**<sup>1</sup>H NMR (400 MHz, CDCl<sub>3</sub>)**  $\delta$  = 7.01 (s, 2H), 6.24 (t, *J* = 5.3 Hz, 1H), 4.30 (d, *J* = 5.2 Hz, 2H), 3.07-2.80 (m, 3H), 1.31-1.14 (m, 18H) ppm.

**<sup>13</sup>C NMR (101 MHz, CDCl<sub>3</sub>)**  $\delta$  = 173.5, 171.7, 150.4, 145.3, 132.3, 121.2, 41.5, 34.6, 31.1, 24.9-24.4 (4C), 24.1 ppm.

**HRMS (ESI<sup>neg</sup>) m/z:** Calcd for C<sub>18</sub>H<sub>26</sub>NO<sub>3</sub> 304.19072, Found 304.19116.

**IR (cm<sup>-1</sup>):** 1506, 1465, 1379, 1340, 1312, 1160, 1128, 1108, 951, 917, 650.

### <sup>1</sup>H-NMR spectrum in CDCl<sub>3</sub>:

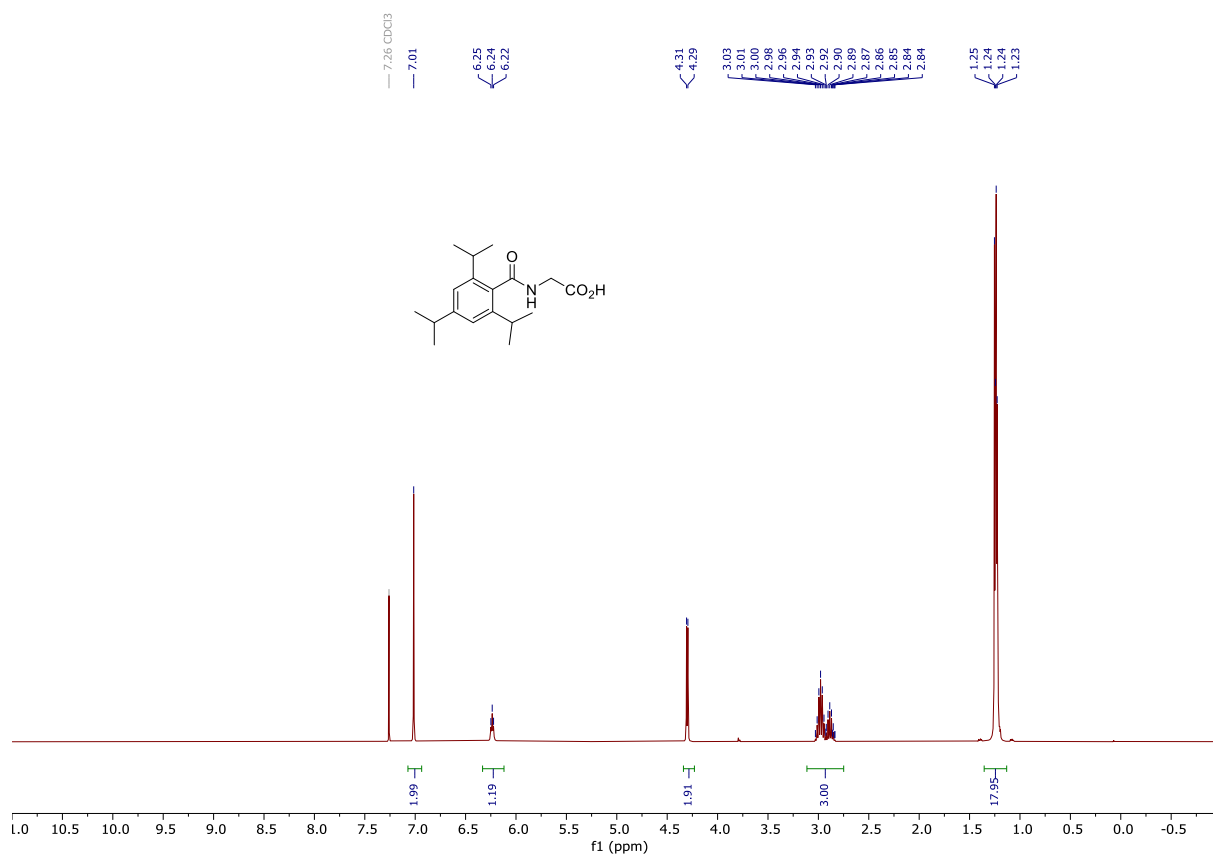

### <sup>13</sup>C-NMR spectrum in CDCl<sub>3</sub>:

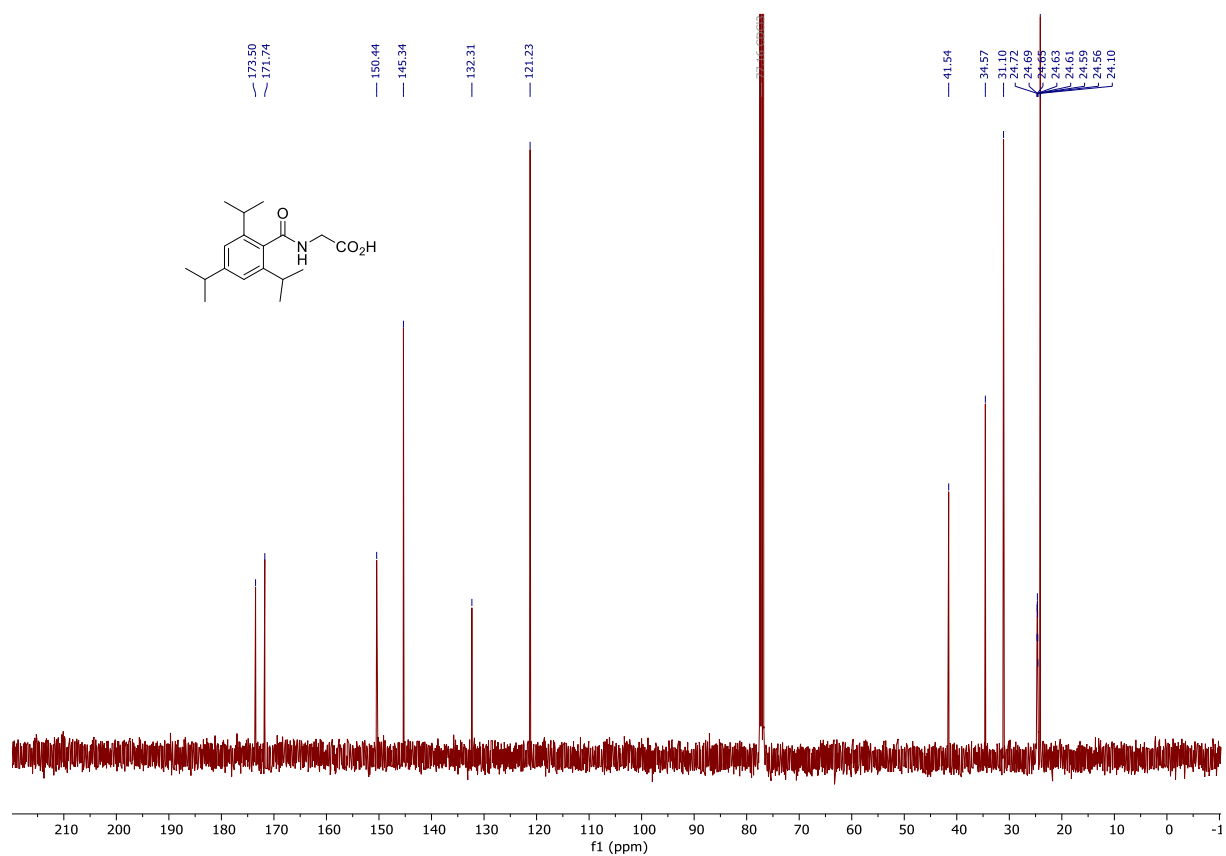

## 2-acetamido-*N*-(mesitylsulfonyl)acetamide (**L4**)

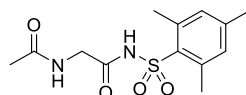

Following the general procedure B using acetylglycine (234 mg, 2.00 mmol) and 2,4,6-trimethylbenzenesulfonamide (439 mg, 2.20 mmol, 1.1 equiv.), and purification via silica gel column chromatography using MeOH:CH<sub>2</sub>Cl<sub>2</sub> = 1:19 as the eluent, the target compound **L4** was obtained as colorless solid (378 mg, 1.27 mmol, 63%).

**<sup>1</sup>H NMR (400 MHz, CD<sub>3</sub>OD)** δ = 7.01 (s, 2H), 3.84 (s, 2H), 2.66 (s, 6H), 2.29 (s, 3H), 1.93 (s, 3H) ppm.

**<sup>13</sup>C NMR (101 MHz, CD<sub>3</sub>OD)** δ = 173.8, 169.9, 144.7, 141.6, 134.5, 132.8, 43.3, 22.8, 22.2, 21.0 ppm.

**HRMS (ESIneg) m/z:** Calcd for C<sub>13</sub>H<sub>17</sub>N<sub>2</sub>O<sub>4</sub>S 297.09035, Found 297.09072.

**IR (cm<sup>-1</sup>):** 2460, 2240, 2211, 2071, 1507, 1122, 1092, 973, 819.

### <sup>1</sup>H-NMR spectrum in CD<sub>3</sub>OD:

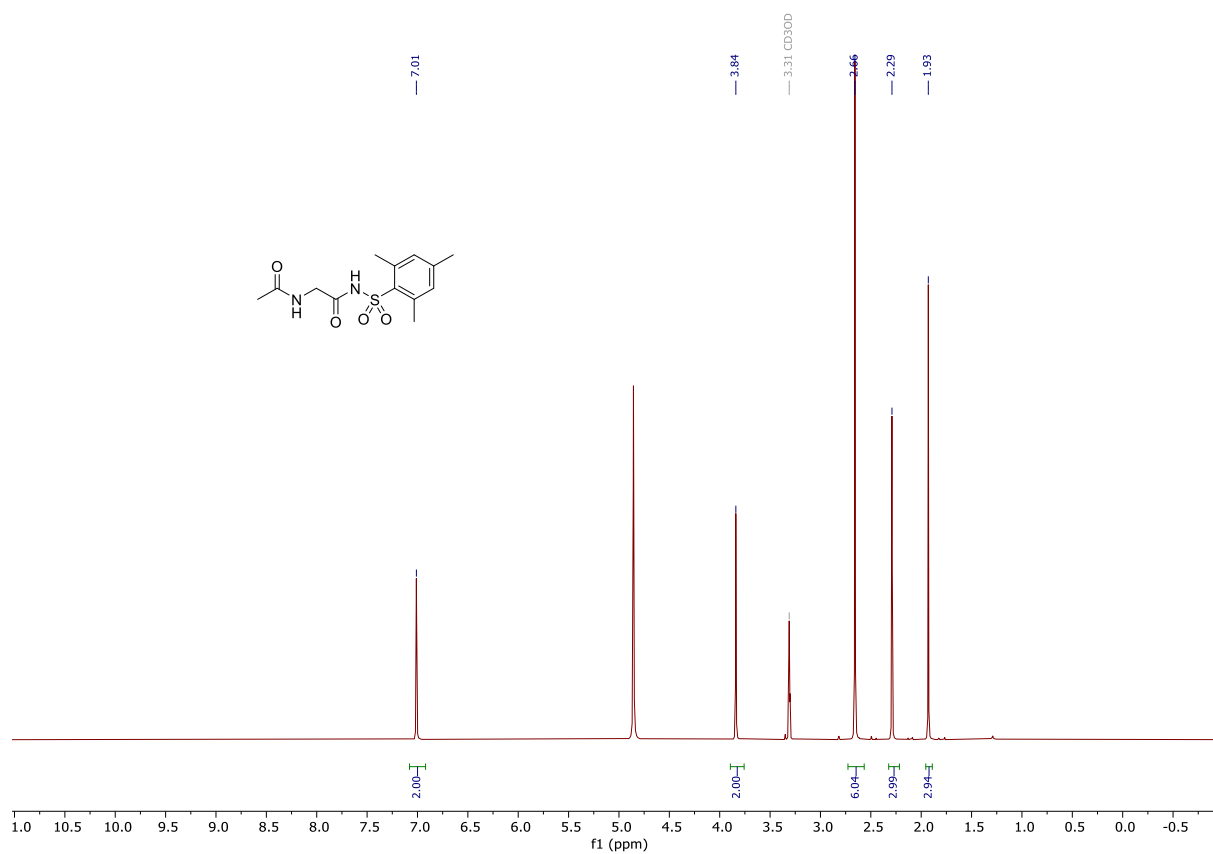

### <sup>13</sup>C-NMR spectrum in CD<sub>3</sub>OD:

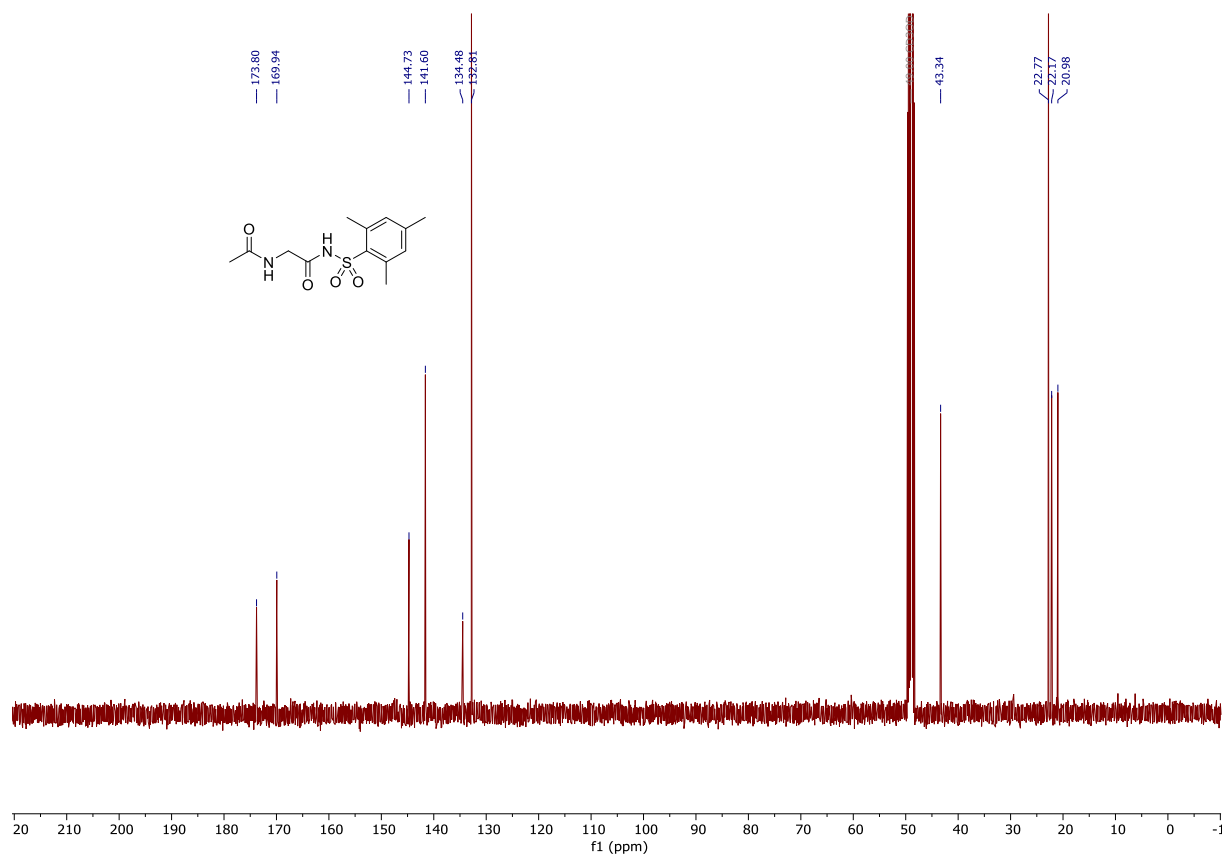

**2-acetamido-*N*-((2,4,6-trifluorophenyl)sulfonyl)acetamide (L5)**

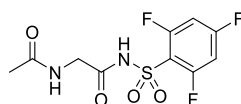

Following the general procedure B using acetylglycine (234 mg, 2.00 mmol, 1.0 equiv.) and 2,4,6-trifluorobenzenesulfonamide (465 mg, 2.20 mmol, 1.1 equiv.), and purification via silica gel column chromatography using MeOH:CH<sub>2</sub>Cl<sub>2</sub> = 1:19 with 0.3% formic acid as the eluent, the target compound **L5** was obtained as colorless solid (549 mg, 1.77 mmol, 89%).

**<sup>1</sup>H NMR (500 MHz, CD<sub>3</sub>OD)** δ = 7.10 (s, 2H), 3.89 (s, 2H), 1.95 (s, 3H) ppm.

**<sup>13</sup>C NMR (126 MHz, CD<sub>3</sub>OD)** δ = 173.8, 170.2, 167.4, 162.5, 115.5, 103.2, 43.6, 22.1 ppm.

**<sup>19</sup>F NMR (470 MHz, CD<sub>3</sub>OD)** δ = -99.5 (t, *J* = 11.9 Hz), -104.3 (d, *J* = 11.9 Hz) ppm.

**HRMS (ESI<sup>neg</sup>) m/z:** Calcd for C<sub>10</sub>H<sub>8</sub>F<sub>3</sub>N<sub>2</sub>O<sub>4</sub>S 309.01514, Found 309.01571.

**IR (cm<sup>-1</sup>):** 2464, 2209, 2071, 1559, 1507, 1122, 1092, 973, 819.

### <sup>1</sup>H-NMR spectrum in CD<sub>3</sub>OD:

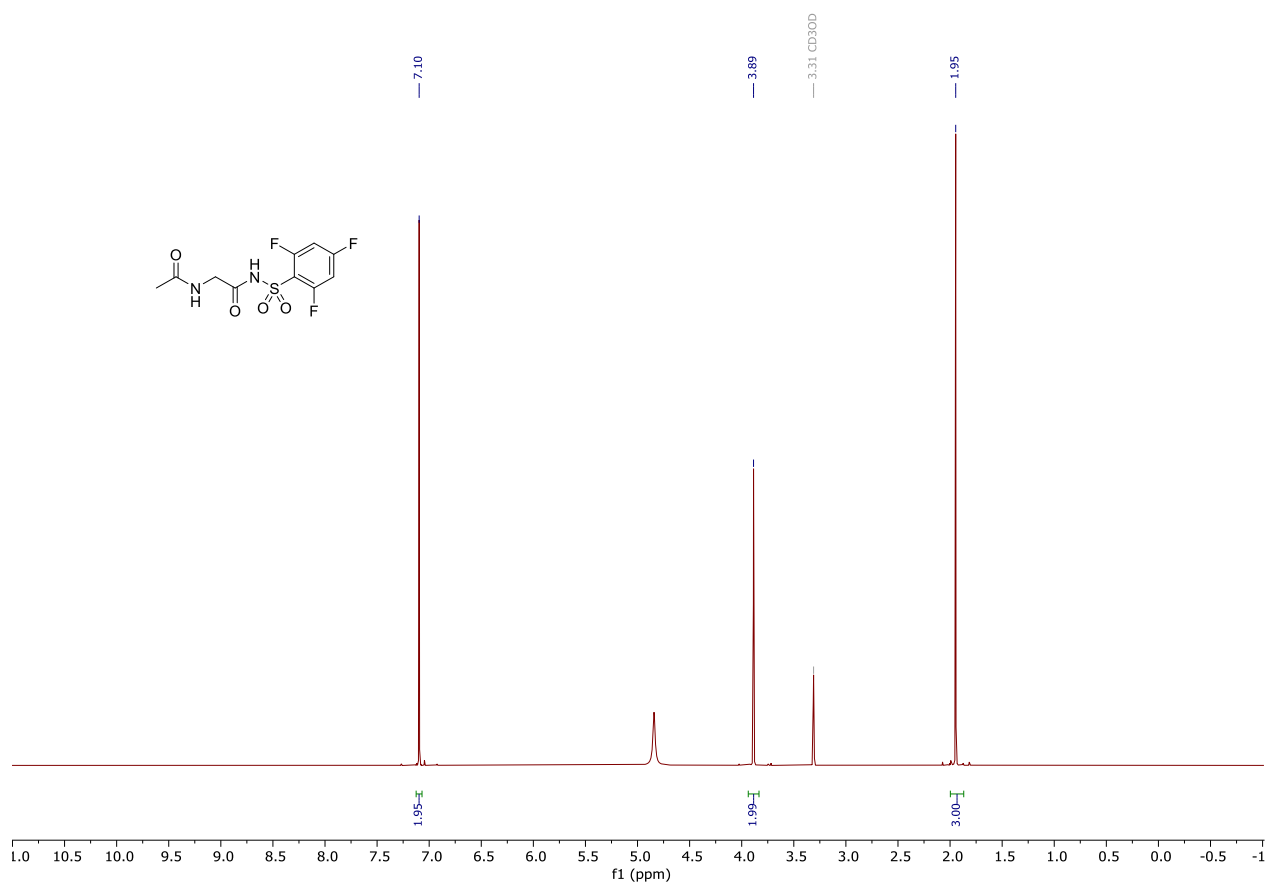

### <sup>13</sup>C-NMR spectrum in CD<sub>3</sub>OD:

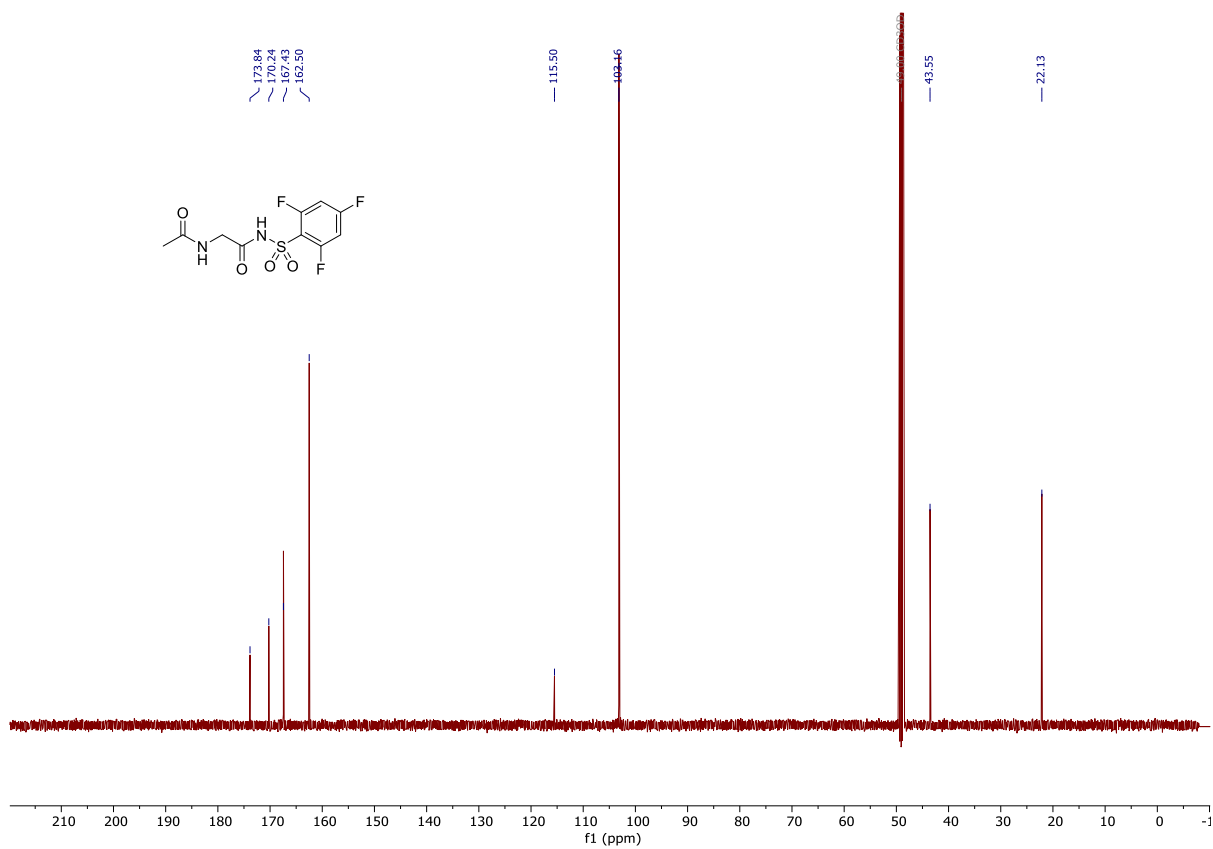



**$^{19}\text{F}$ -NMR spectrum in  $\text{CD}_3\text{OD}$ :**

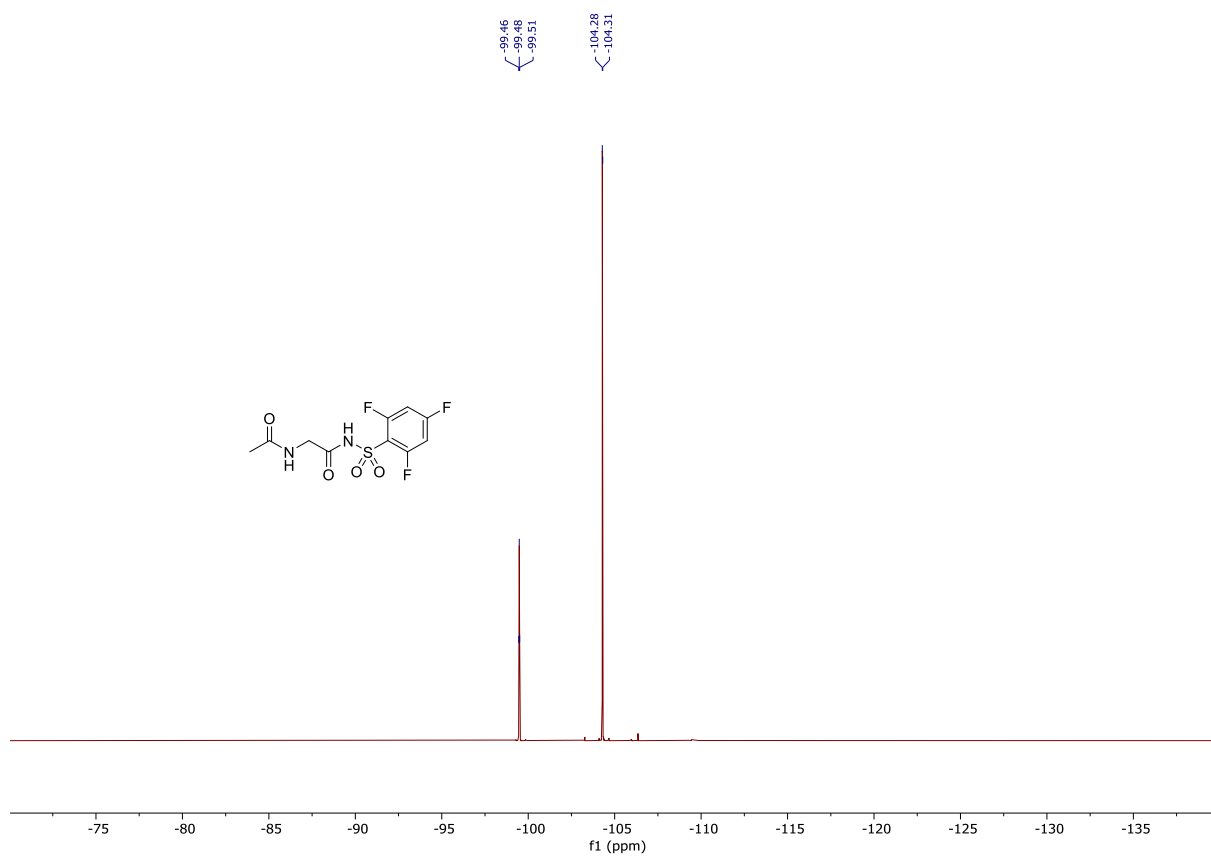

**2,4,6-triisopropyl-N-(2-oxo-2-((2,4,6-trimethylphenyl)sulfonamido)ethyl)benzamide (L6)**

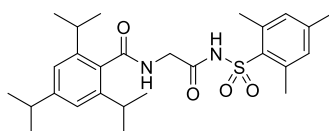

Following the general procedure B using (2,4,6-triisopropylbenzoyl)glycine **L3** (611 mg, 2.00 mmol, 1.0 equiv.) and 2,4,6-trimethylbenzenesulfonamide (439 mg, 2.20 mmol, 1.1 equiv.), and purification via silica gel column chromatography using MeOH:CH<sub>2</sub>Cl<sub>2</sub> = 1:49 with 0.3% formic acid as the eluent, the target compound **L6** was obtained as colorless solid (740 mg, 1.52 mmol, 76%)

**<sup>1</sup>H NMR (400 MHz, CDCl<sub>3</sub>)** δ = 9.81 (s, 1H), 6.99 (s, 2H), 6.98 (s, 2H), 6.41 (t, *J* = 5.4 Hz, 1H), 4.16 (d, *J* = 5.5 Hz, 2H), 2.96-2.76 (m, 3H), 2.70 (s, 6H), 2.30 (s, 3H), 1.28-1.18 (m, 18H) ppm.

**<sup>13</sup>C NMR (101 MHz, CDCl<sub>3</sub>)** δ = 172.8, 167.4, 150.7, 145.2, 143.9, 140.8, 132.6, 132.2, 131.7, 121.2, 44.7, 34.6, 31.4, 25.2-24.2 (4C), 24.1, 22.9, 21.2 ppm.

**HRMS (ESI<sup>neg</sup>) m/z:** Calcd for C<sub>27</sub>H<sub>37</sub>N<sub>2</sub>O<sub>4</sub>S 485.24685, Found 485.24696.

**IR (cm<sup>-1</sup>):** 1559, 1539, 1507, 1457, 1379, 1369, 1340, 1313, 1160, 1128, 1107, 951, 922, 910, 816, 733, 646.

# <sup>1</sup>H-NMR spectrum in CDCl<sub>3</sub>:

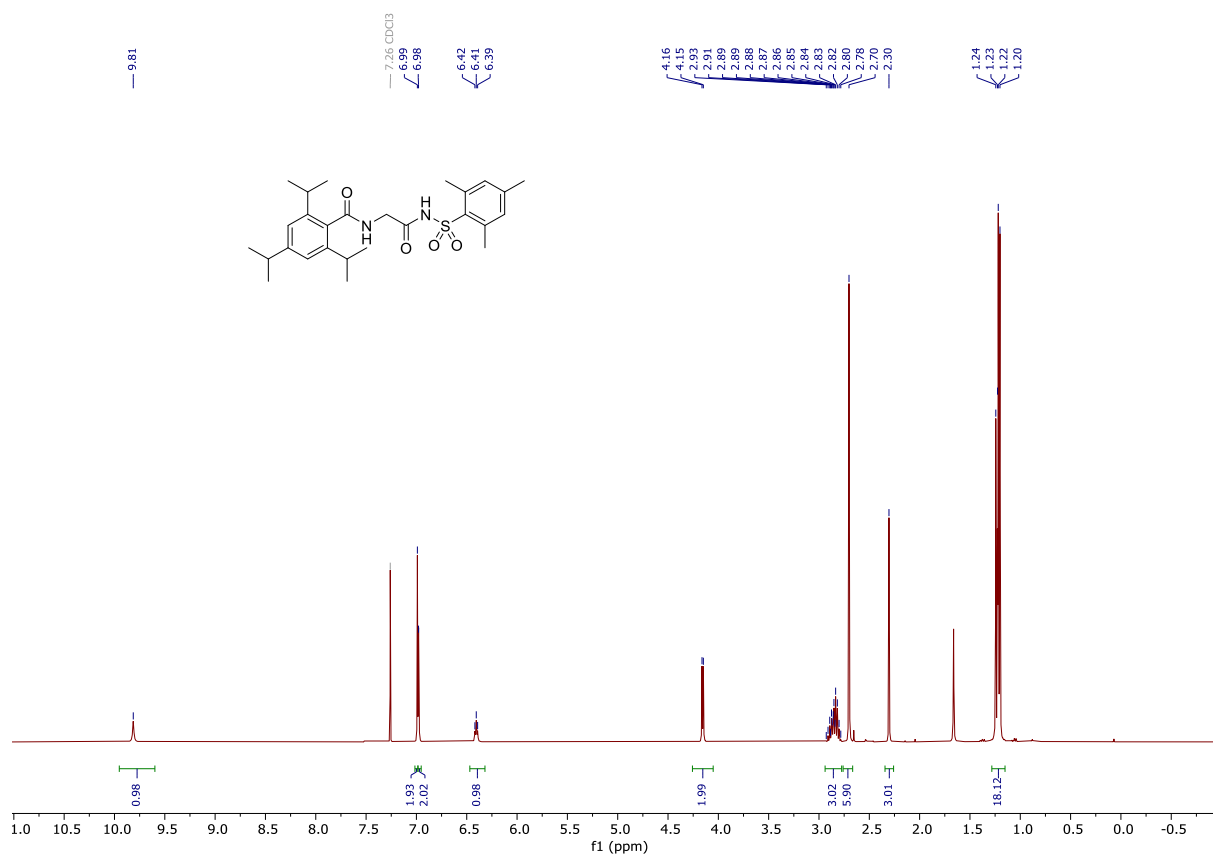

# <sup>13</sup>C-NMR spectrum in CDCl<sub>3</sub>:

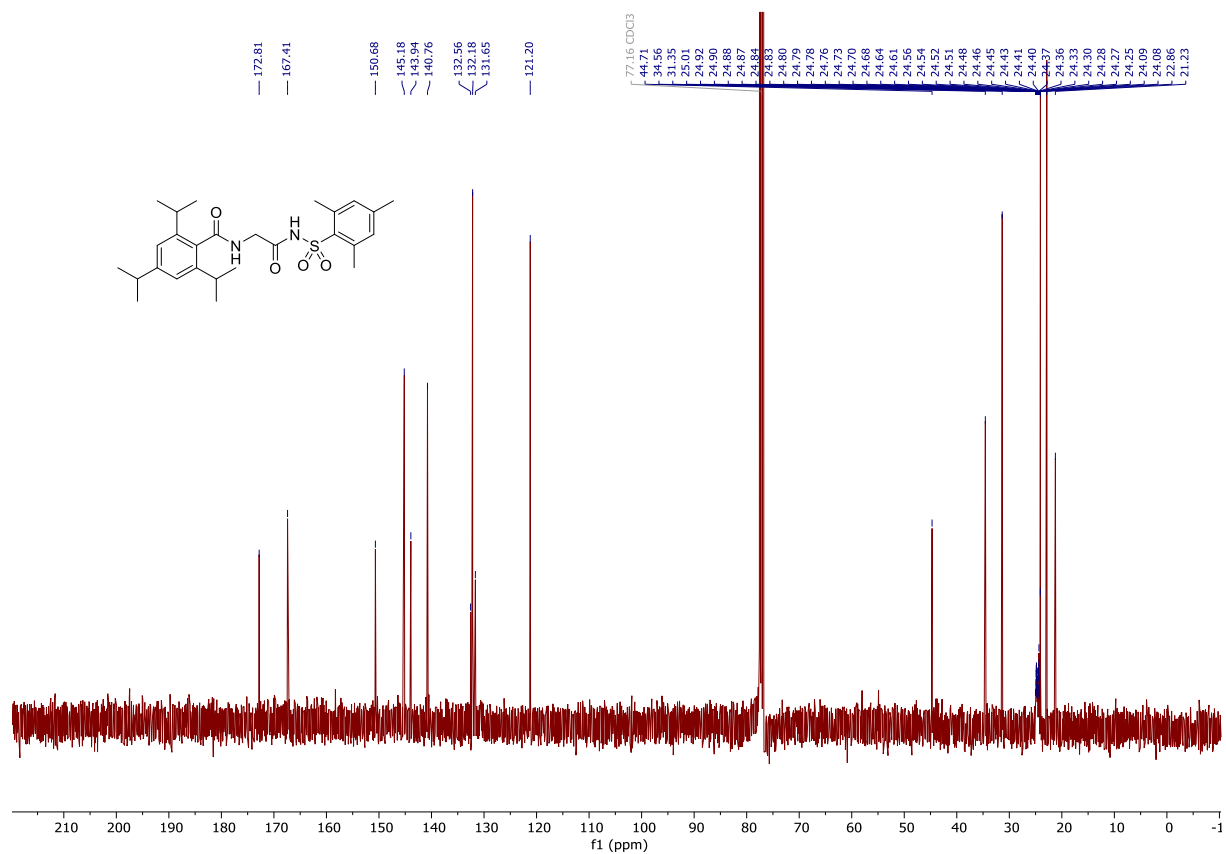

**2,4,6-triisopropyl-N-(2-oxo-2-((2,4,6-trifluorophenyl)sulfonamido)ethyl)benzamide (L7)**

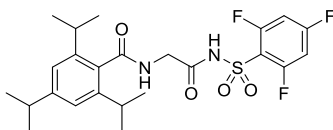

Following the general procedure B using (2,4,6-triisopropylbenzoyl)glycine **L3** (611 mg, 2.00 mmol, 1.0 equiv.) and 2,4,6-trifluorobenzenesulfonamide (465 mg, 2.20 mmol, 1.2 equiv.), and purification via silica gel column chromatography using MeOH:CH<sub>2</sub>Cl<sub>2</sub> = 1:49 with 0.3% formic acid as the eluent, the target compound **L7** was obtained as colorless solid (879 mg, 1.76 mmol, 88%).

**<sup>1</sup>H NMR (400 MHz, CDCl<sub>3</sub>)** δ = 7.00 (s, 2H), 6.81 (t, *J* = 8.5 Hz, 2H), 6.43 (t, *J* = 5.5 Hz, 1H), 4.22 (d, *J* = 5.5 Hz, 2H), 2.95-2.68 (m, 3H), 1.31-1.13 (m, 18H) ppm.

**<sup>13</sup>C NMR (126 MHz, CDCl<sub>3</sub>)** δ = 172.9, 168.2, 166.1, 161.3, 150.7, 145.3, 131.5, 121.2, 114.0, 102.3, 44.5, 34.6, 31.3, 27.0-22.4 (3C) ppm.

**<sup>19</sup>F NMR (470 MHz, CDCl<sub>3</sub>)** δ = -100.0 (t, *J* = 12.1 Hz), -105.7 (d, *J* = 12.2 Hz) ppm.

**HRMS (ESI<sup>neg</sup>) m/z:** Calcd for C<sub>24</sub>H<sub>28</sub>F<sub>3</sub>N<sub>2</sub>O<sub>4</sub>S 497.17164, Found 497.17165.

**IR (cm<sup>-1</sup>):** 1653, 1559, 1507, 1457, 904, 849, 723, 665, 650.

### <sup>1</sup>H-NMR spectrum in CDCl<sub>3</sub>:

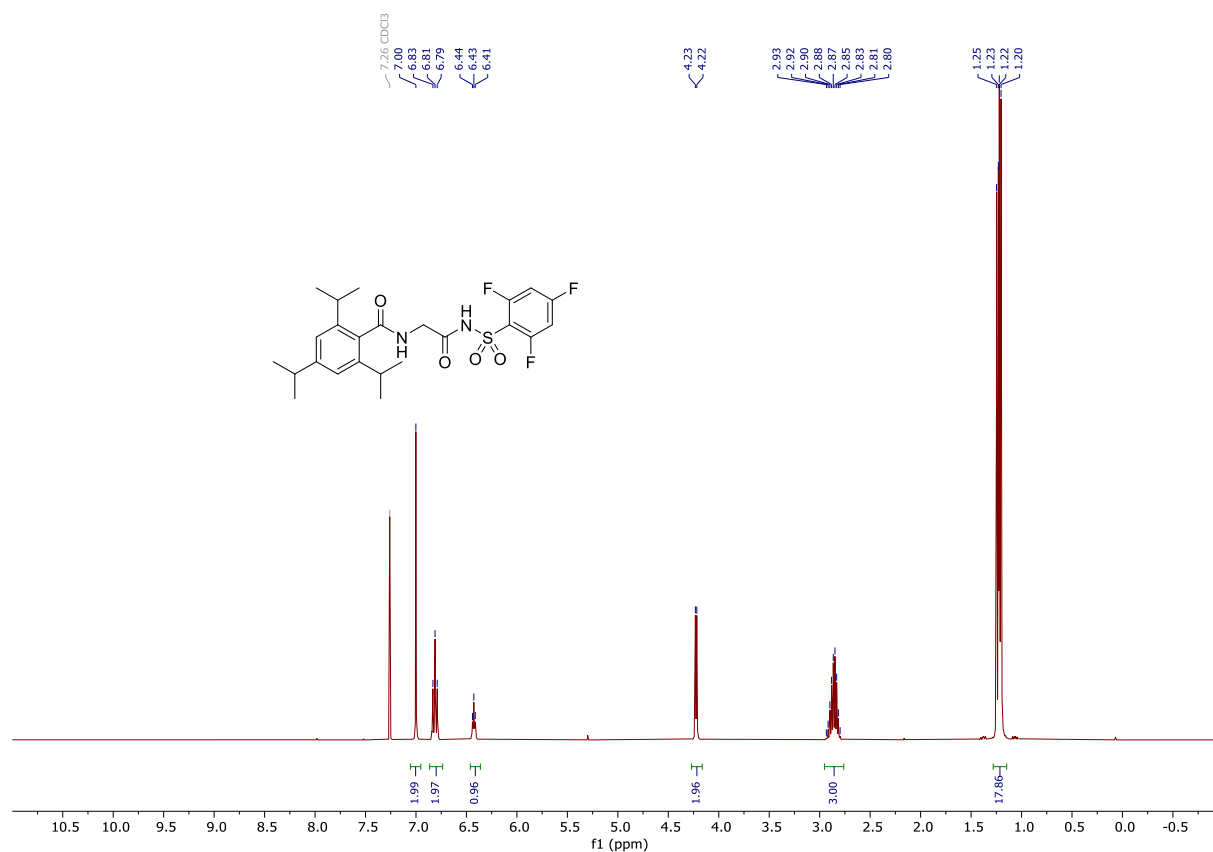

### <sup>13</sup>C-NMR spectrum in CDCl<sub>3</sub>:

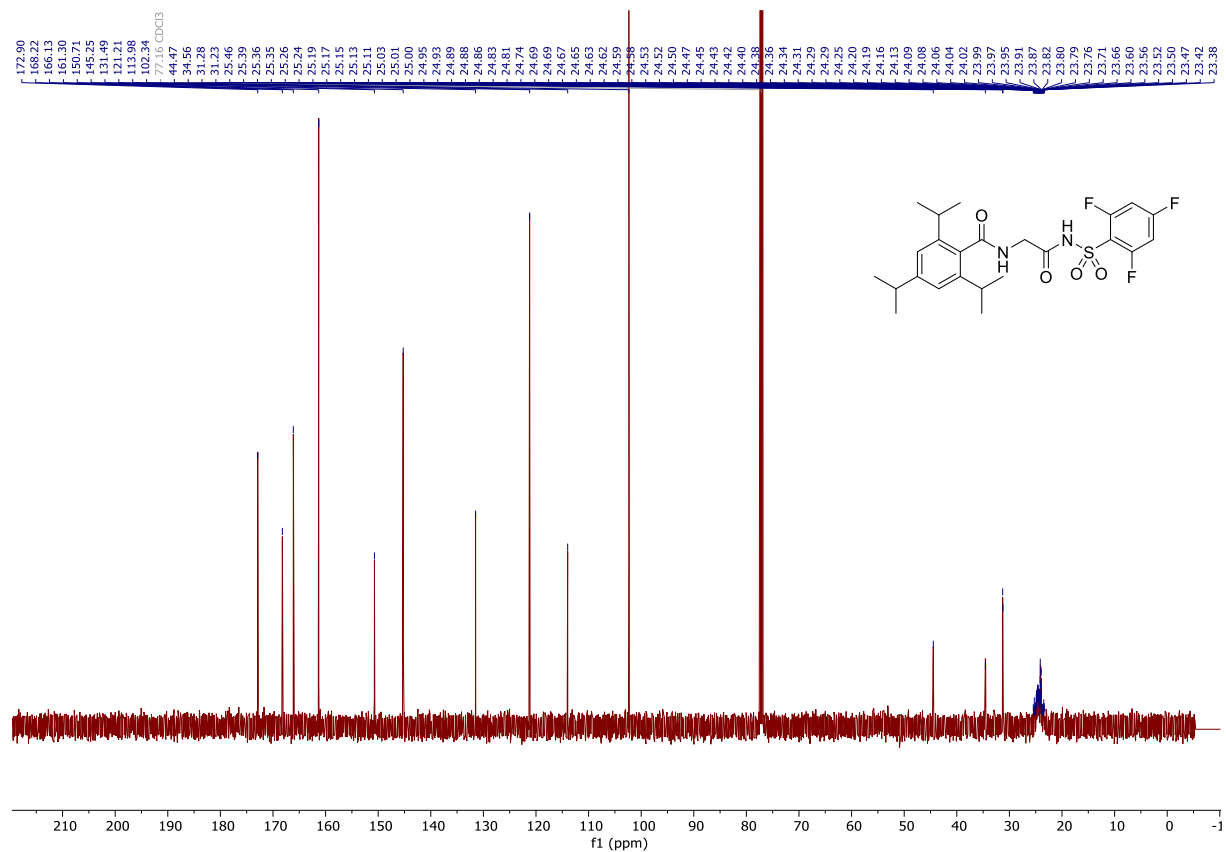

**$^{19}\text{F}$ -NMR spectrum in  $\text{CDCl}_3$ :**

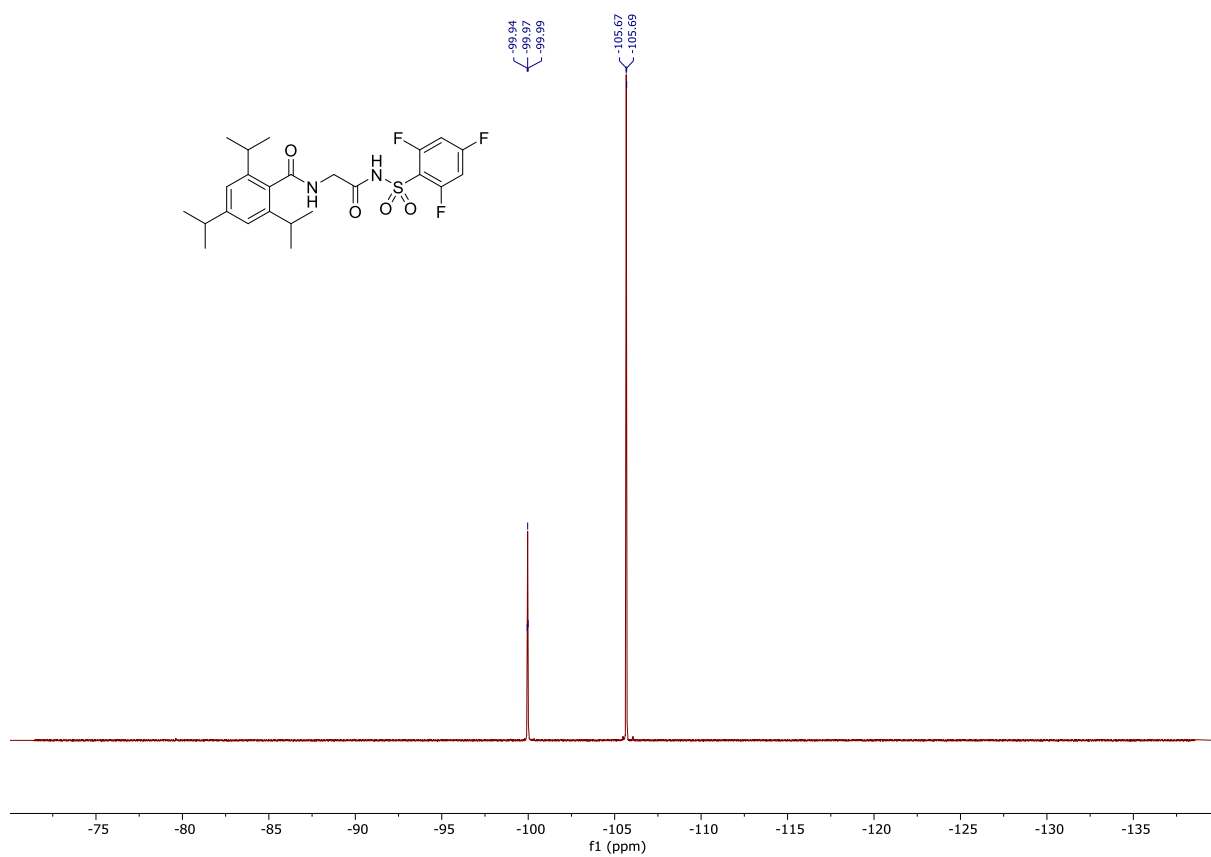

## 2-acetamido-*N*-(methylsulfonyl)acetamide (**L8**)

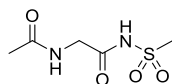

Following the general procedure B using acetylglycine (234 mg, 2.00 mmol, 1.0 equiv.) and methanesulfonamide (209 mg, 2.20 mmol, 1.1 equiv.), and purification via silica gel column chromatography using MeOH:CH<sub>2</sub>Cl<sub>2</sub> = 1:19 with 0.3% formic acid as the eluent, the target compound **L4** was obtained as colorless solid (307 mg, 1.58 mmol, 79%).

**<sup>1</sup>H NMR (400 MHz, CD<sub>3</sub>OD)** δ = 3.91 (s, 2H), 3.24 (s, 3H), 2.01 (s, 1H) ppm.

**<sup>13</sup>C NMR (101 MHz, CD<sub>3</sub>OD)** δ = 174.0, 170.7, 43.7, 41.4, 22.2 ppm.

**HRMS (ESI<sup>neg</sup>) m/z:** Calcd for C<sub>5</sub>H<sub>9</sub>N<sub>2</sub>O<sub>4</sub>S 193.02775, Found 193.02861.

**IR (cm<sup>-1</sup>):** 2468, 2241, 2208, 2071, 1507, 1122, 1090, 973, 925.

### <sup>1</sup>H-NMR spectrum in CD<sub>3</sub>OD:

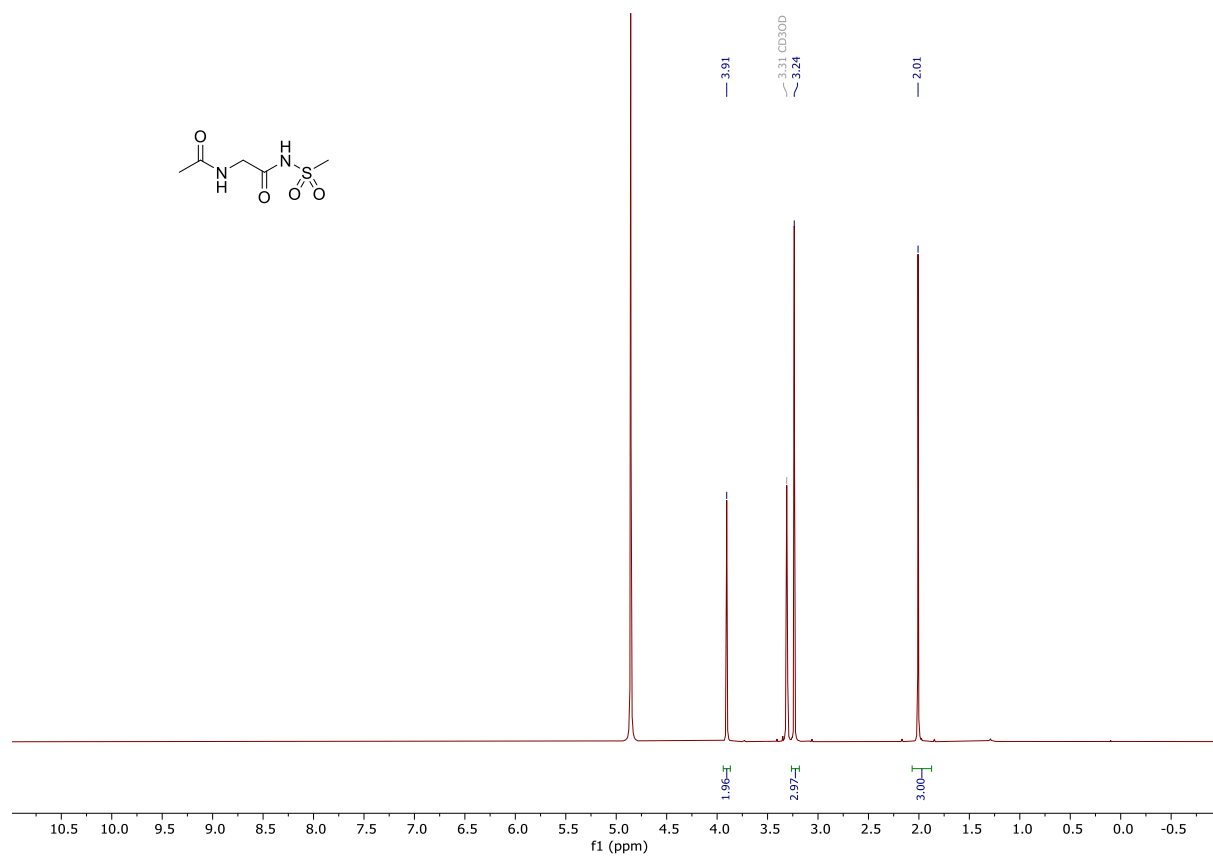

### <sup>13</sup>C-NMR spectrum in CD<sub>3</sub>OD:

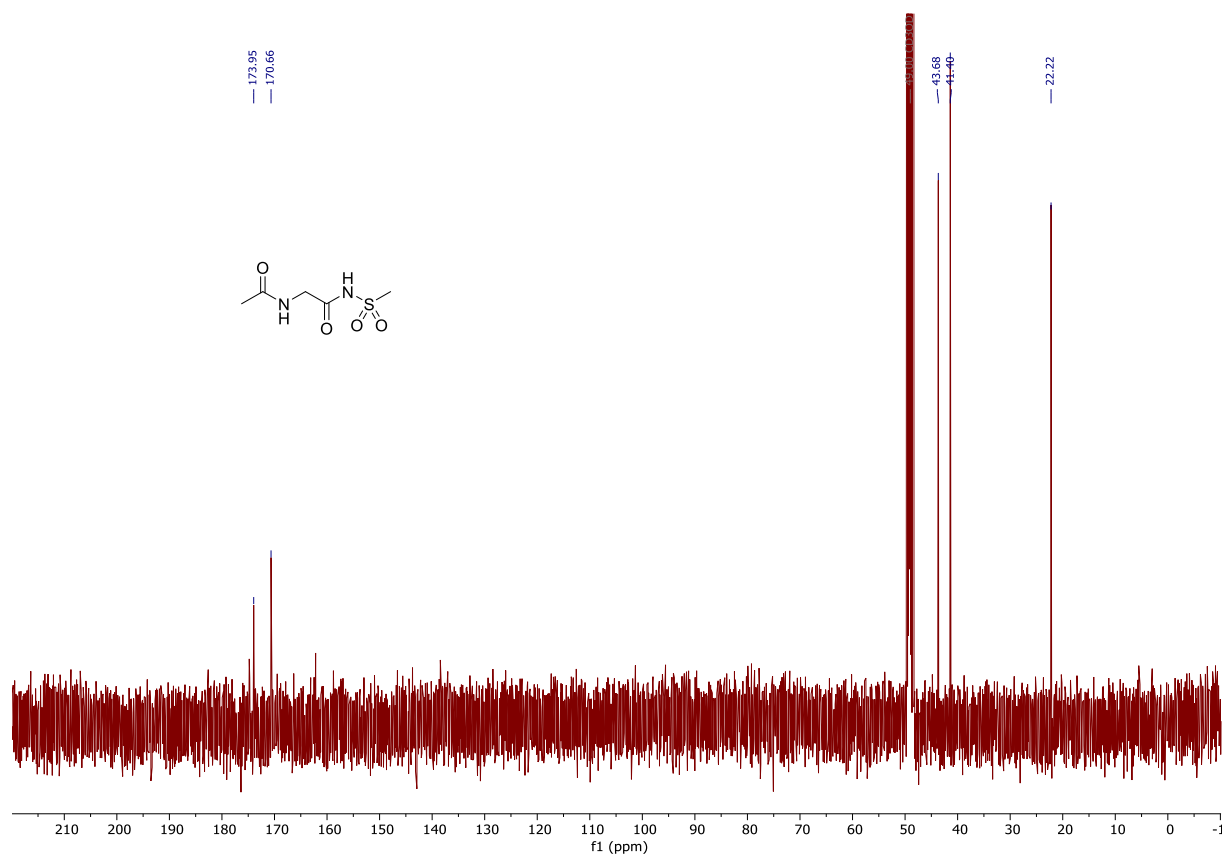



**2,4,6-triisopropyl-N-(2-(methylsulfonamido)-2-oxoethyl)benzamide (L9)**

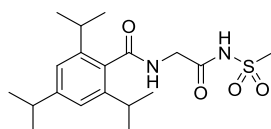

Following the general procedure **B** using (2,4,6-triisopropylbenzoyl)glycine **L3** (611 mg, 2.00 mmol, 1.0 equiv.) and methanesulfonamide (209 mg, 2.20 mmol, 1.1 equiv.), and purification via silica gel column chromatography using MeOH:CH<sub>2</sub>Cl<sub>2</sub> = 1:49 with 0.3% formic acid as the eluent, the target compound **L6** was obtained as colorless solid (543 mg, 1.42 mmol, 71%).

**<sup>1</sup>H NMR (400 MHz, CD<sub>3</sub>OD)** δ = 7.06 (s, 2H), 4.07 (s, 2H), 3.27 (s, 3H), 3.08 (hept, *J* = 6.7 Hz, 2H), 2.88 (hept, *J* = 6.9 Hz, 1H), 1.28 (d, *J* = 6.8 Hz, 6H), 1.22 (dd, *J* = 6.9, 1.9 Hz, 12H) ppm.

**<sup>13</sup>C NMR (101 MHz, CD<sub>3</sub>OD)** δ = 174.4, 170.1, 151.4, 146.6, 134.0, 121.9, 43.6, 41.4, 35.7, 32.0, 24.9, 24.6, 24.4 ppm.

**HRMS (ESI<sup>neg</sup>) m/z:** Calcd for C<sub>19</sub>H<sub>29</sub>N<sub>2</sub>O<sub>4</sub>S 381.18425, Found 381.18463.

**IR (cm<sup>-1</sup>):** 2467, 2240, 2207, 2071, 1559, 1507, 1122, 1090, 973, 824.

### <sup>1</sup>H-NMR spectrum in CD<sub>3</sub>OD:

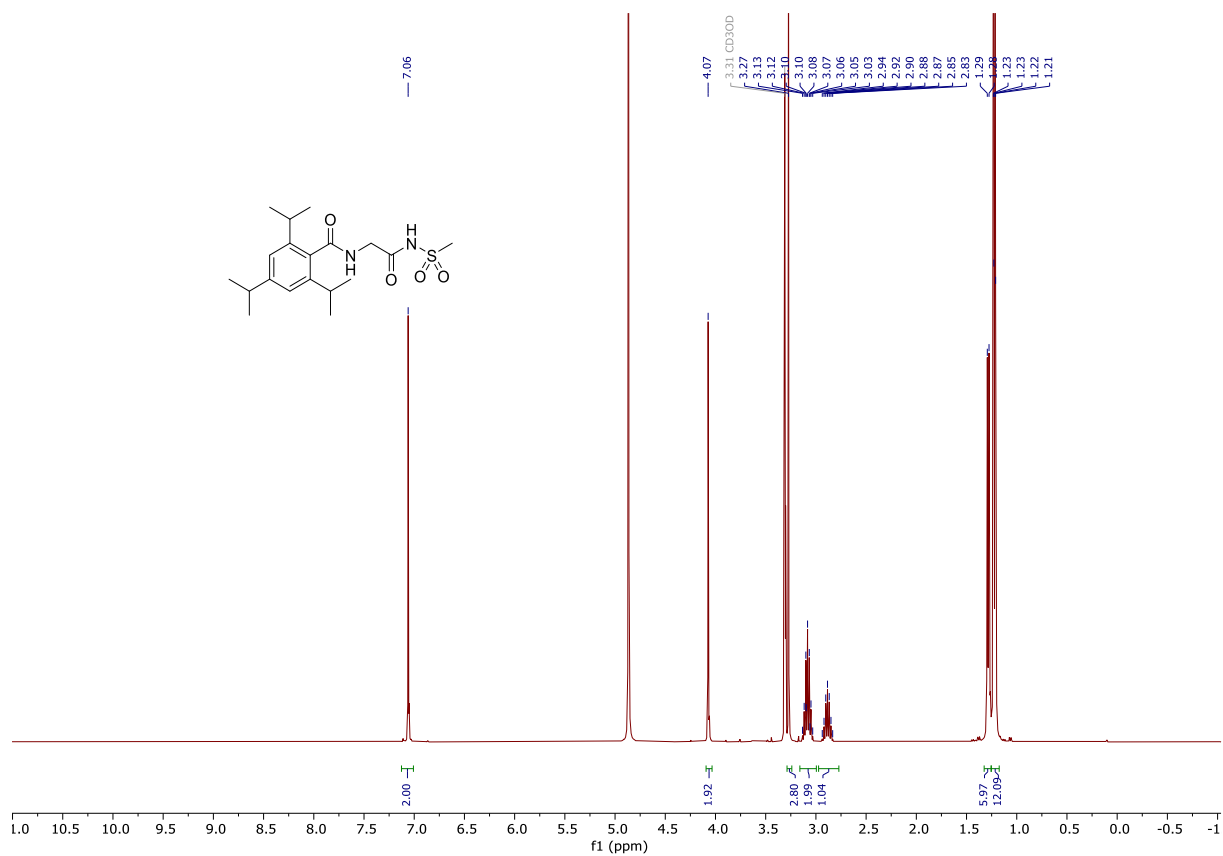

### <sup>13</sup>C-NMR spectrum in CD<sub>3</sub>OD:

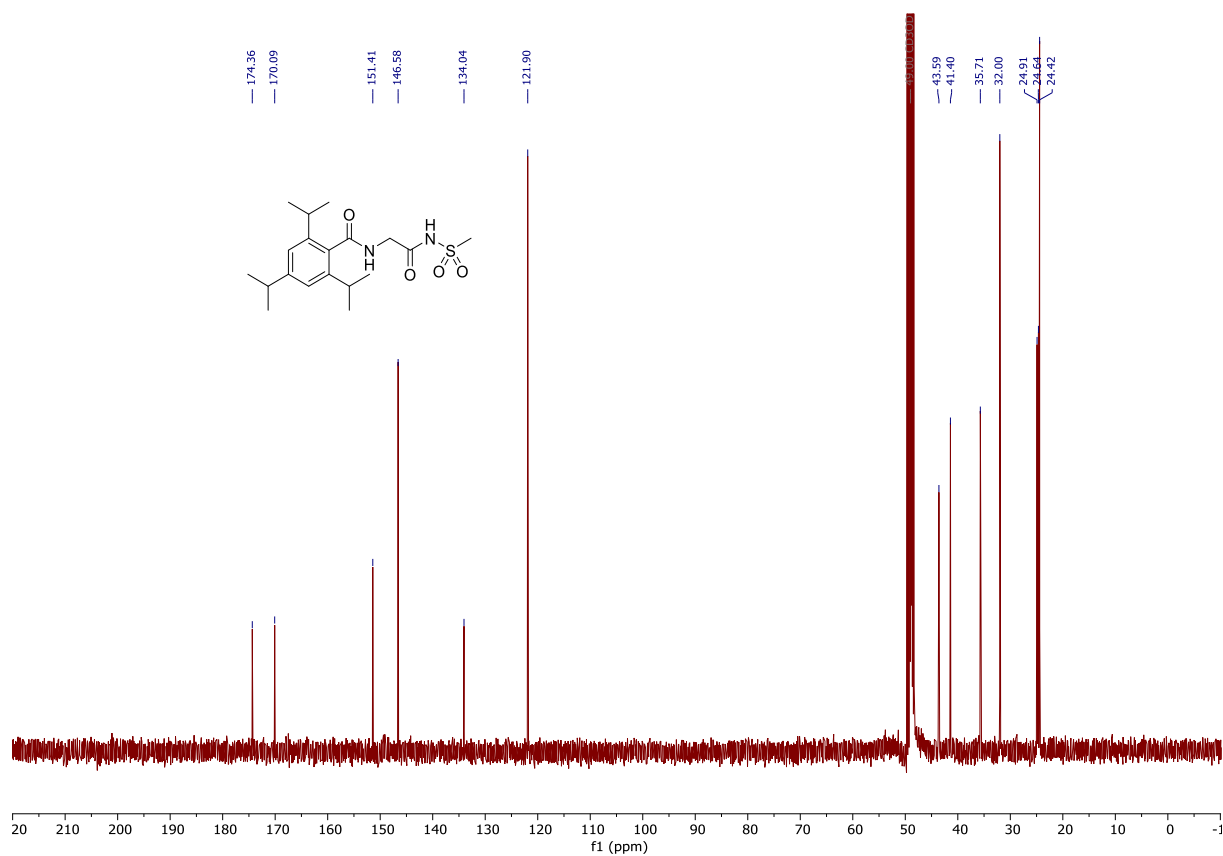

### 3 Optimization of the Reaction Conditions with Electron-Donating Substituents

#### General Procedure C:

An oven dried 10 mL Schlenk tube was charged with a Pd(OAc)<sub>2</sub>, a bidentate ligand, a pyridine ligand, if indicated an Ag-source, *tert*-butyl benzene or anisole (0.100 mmol), and solvent. The reaction vessel was tightly sealed then placed into the inside circle of a preheated aluminum block with a tightly fitting recess on a magnetic stirrer and stirred at the indicated temperature until completion of the reaction. The reaction mixture was allowed to cool to room temperature. 1,3,5-trimethoxybenzene or 1,3,5-trimethylbenzene was added as an internal standard. The reaction mixture was filtered over a pad of Celite<sup>®</sup> and the residue was washed with dichloromethane. The overall solution was concentrated under reduced pressure and CDCl<sub>3</sub> (0.9 mL) was added. All yields and deuteration degrees during the optimization study were determined via <sup>1</sup>H-NMR of the crude reaction using 1,3,5-trimethoxybenzene or 1,3,5-trimethylbenzene as an internal standard.

### Scheme S3.1: Screening of silver salts.

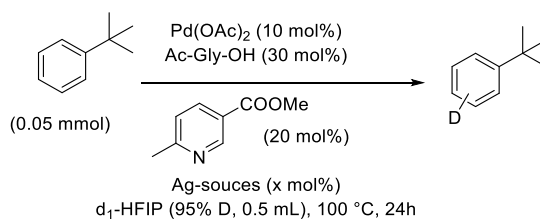

| Entry | Ag-sources                                | Yield of starting material and product (% , GC-FID) | D-content after reaction (NMR)           |
|-------|-------------------------------------------|-----------------------------------------------------|------------------------------------------|
| 1     | AgOAc (50 mol%)                           | 92                                                  | Ortho - 3%<br>meta - 93%<br>para - 94%   |
| 2     | AgF (50 mol%)                             | quant                                               | Ortho - 7%<br>meta - 96%<br>para - 95%   |
| 3     | Ag <sub>2</sub> CO <sub>3</sub> (25 mol%) | 93                                                  | Ortho - 11%<br>meta - >99%<br>para - 97% |

### Scheme S3.2: Screening of the amount of silver salt.

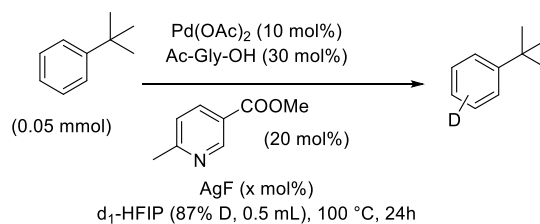

| Entry | AgF amount | Yield of starting material and product (% , GC-FID) | D-content after reaction (NMR)          |
|-------|------------|-----------------------------------------------------|-----------------------------------------|
| 1     | 50 mol%    | -                                                   | Ortho - 6%<br>meta - 94%<br>para - 95%  |
| 2     | 30 mol%    | quant                                               | Ortho - 4%<br>meta - 94%<br>para - 96%  |
| 3     | 10 mol%    | 86                                                  | Ortho - 4%<br>meta - 93%<br>para - 93%  |
| 4     | w/o Ag     | 93                                                  | Ortho - 0%<br>meta - >50%<br>para - 61% |

**Scheme S3.3:** Screening of the amount of catalyst.

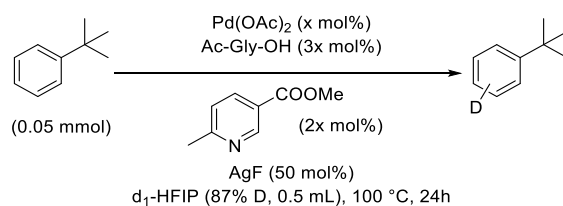

| Entry | Amount of $\text{Pd(OAc)}_2$ | Yield of starting material and product (% GC-FID) | D-content after reaction (NMR)         |
|-------|------------------------------|---------------------------------------------------|----------------------------------------|
| 1     | 10 mol%                      | quant                                             | Ortho - 5%<br>meta - 91%<br>para - 92% |
| 2     | 5 mol%                       | quant                                             | Ortho - 4%<br>meta - 94%<br>para - 96% |

**Scheme S3.4:** Screening of temperature.

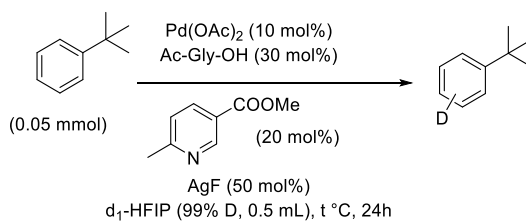

| Entry | Temperature | Yield of starting material and product (% GC-FID) | D-content after reaction (NMR)          |
|-------|-------------|---------------------------------------------------|-----------------------------------------|
| 1     | 100         | quant                                             | Ortho - 5%<br>meta - 92%<br>para - 94%  |
| 2     | 80          | 81                                                | Ortho - 4%<br>meta - 94%<br>para - 95%  |
| 3     | 60          | 80                                                | Ortho - 5%<br>meta - >92%<br>para - 96% |

**Scheme S3.5: Initial screening of amino-acid derived ligand.**

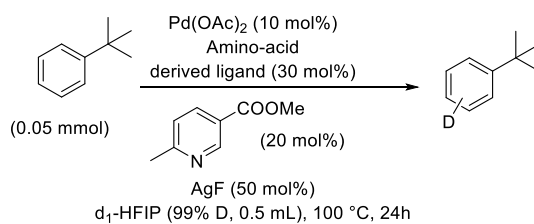

| Entry | Amino-acid derived ligand | Yield of starting material and product (% , NMR) | D-content after reaction (NMR)          |
|-------|---------------------------|--------------------------------------------------|-----------------------------------------|
| 1     | Ac-Gly-OH                 | 97                                               | Ortho - 5%<br>meta - 92%<br>para - 94%  |
| 2     | Ac-Phe-OH                 | 72                                               | Ortho - 3%<br>meta - 91%<br>para - 93%  |
| 3     | Ac-Ala-OH                 | 77                                               | Ortho - 5%<br>meta - >92%<br>para - 96% |

**Scheme S3.6: Re-screening of silver salts.**

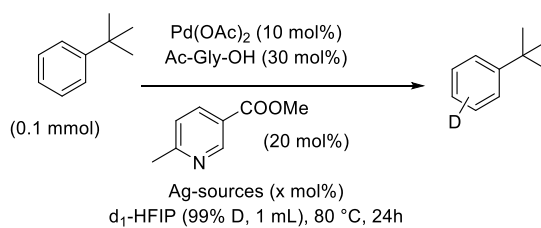

| Entry | Ag-Sources                                | Yield of starting material and product (% , NMR) | D-content after reaction (NMR)          |
|-------|-------------------------------------------|--------------------------------------------------|-----------------------------------------|
| 1     | AgF (30 mol%)                             | 97                                               | Ortho - 3%<br>meta - >95%<br>para - 94% |
| 2     | Ag <sub>2</sub> CO <sub>3</sub> (15 mol%) | 90                                               | Ortho - 4%<br>meta - >95%<br>para - 95% |

**Scheme S3.7:** Screening towards lowering of silver salt amount, temperature simultaneously.

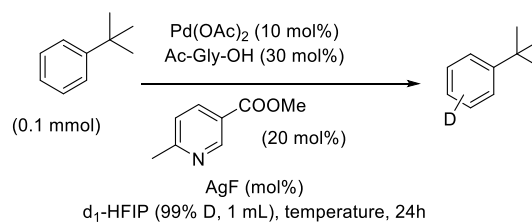

| Entry | Ag-loading (mol%) | Temperature (°C) | Yield of starting material and product (% , NMR) | D-content after reaction (NMR)          |
|-------|-------------------|------------------|--------------------------------------------------|-----------------------------------------|
| 1     | 30                | 80               | 97                                               | Ortho - 3%<br>meta - >95%<br>para - 94% |
| 2     | 30                | 60               | 97                                               | Ortho - 3%<br>meta - 89%<br>para - 85%  |
| 3     | 10                | 80               | 98                                               | Ortho - 0%<br>meta - 52%<br>para - 64%  |

After **Scheme S3.7**, we were interested to see if the electron-donating substrates can be deuterated at lower temperatures. Unfortunately, simple Ac-Gly-OH failed to deliver good results (**Scheme S3.8**, entry 1). Hence in **Scheme S3.8** (entry 2 and entry 3), we chose the two best ligands from the optimization of electron-withdrawing substrate, which proved more efficient than Ac-Gly-OH (*cf.* **Scheme S4.4** and **Scheme S4.7**).

**Scheme S3.8:** Screening towards comparison between the bidentate ligands.

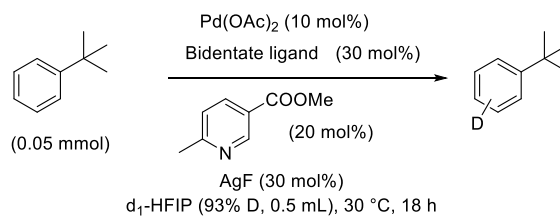

| Entry | Bidentate ligand | Yield of starting material and product (% , NMR) | D-content after reaction (NMR)             |
|-------|------------------|--------------------------------------------------|--------------------------------------------|
| 1     | Ac-Gly-OH        | 91                                               | Ortho - 0%<br>meta - 10%<br>para - 13%     |
| 2     |                  | 93                                               | Ortho - 3%<br>meta - 56.5%<br>para - 71%   |
| 3     |                  | 96                                               | Ortho - 1.5%<br>meta - 19.5%<br>para - 31% |

**Scheme S3.9:** Screening of pyridine ligand with 2,4,6-triisopropyl-*N*-(2-oxo-2-((2,4,6-trifluorophenyl)sulfonamide)ethyl)benzamide as bidentate ligand.

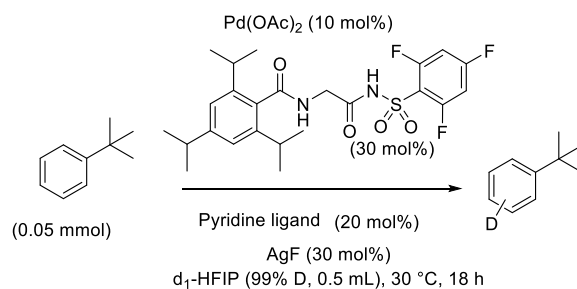

| Entry | Pyridine ligand                                                                                        | Yield of starting material and product (% , NMR) | D-content after reaction (NMR)             |
|-------|--------------------------------------------------------------------------------------------------------|--------------------------------------------------|--------------------------------------------|
| 1     | 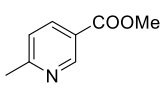                      | 96                                               | Ortho - 1.5%<br>meta - 19.5%<br>para - 31% |
| 2     |                       | 96                                               | Ortho - 0%<br>meta - < 20%<br>para - < 30% |
| 3     |                      | 100                                              | Ortho - 1%<br>meta - 24%<br>para - 35%     |
| 4     |                     | 100                                              | Ortho - 6%<br>meta - 24%<br>para - 34%     |
| 5     | <br>and 120 °C      | 96                                               | Ortho - 4%<br>meta - 90%<br>para - 90%     |
| 6     | <br>and 48 h        | 93                                               | Ortho - 0%<br>meta - 55%<br>para - 71%     |
| 7     | <br>and without AgF | 60                                               | Ortho - 2%<br>meta - 24%<br>para - 34%     |



**Scheme S3.10:** Screening of pyridine ligands with (2,4,6-triisopropylbenzoyl)glycine as amino-acid derived ligand.

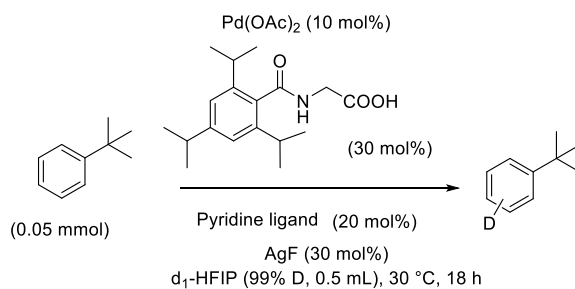

| Entry | Pyridine ligand | Yield of starting material and product (% , NMR) | D-content after reaction (NMR)             |
|-------|-----------------|--------------------------------------------------|--------------------------------------------|
| 1     |                 | 93                                               | Ortho - 3%<br>meta - 56.5%<br>para - 71%   |
| 2     |                 | 89                                               | Ortho - 0%<br>meta - 9%<br>para - 12%      |
| 3     |                 | 94                                               | Ortho - 0%<br>meta - 22%<br>para - 27%     |
| 4     |                 | 98                                               | Ortho - 0.5%<br>meta - 23.5%<br>para - 30% |

**Scheme S3.11: Control experiments.**

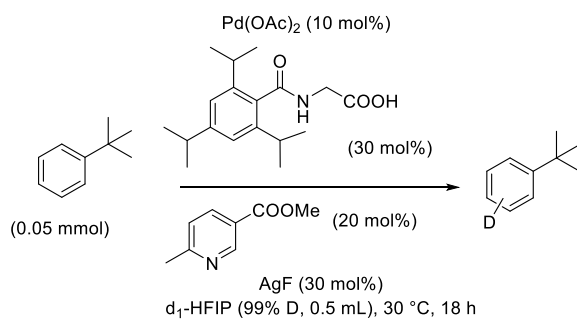

| Entry | Deviation from standard conditions                                                          | Yield of starting material and product (% , NMR) | D-content after reaction (NMR)           |
|-------|---------------------------------------------------------------------------------------------|--------------------------------------------------|------------------------------------------|
| 1     | No deviation                                                                                | 93                                               | Ortho - 3%<br>meta - 56.5%<br>para - 71% |
| 2     | without $\text{Pd(OAc)}_2$                                                                  | 0                                                | Ortho - 0%<br>meta - 0%<br>para - 0%     |
| 3     | without AgF                                                                                 | 55                                               | Ortho - 4%<br>meta - 50%<br>para - 42%   |
| 4     | without 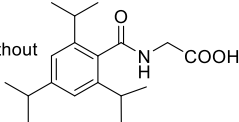 | 90                                               | Ortho - 0%<br>meta - 0%<br>para - 0%     |
| 5     | without  | 100                                              | Ortho - 5%<br>meta - 12%<br>para - 12%   |

**Scheme S3.12: Screening of ratio between catalyst components.**

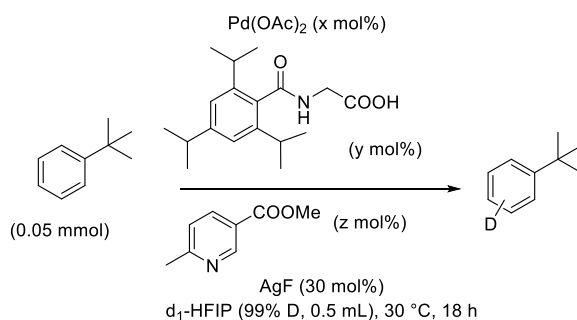

| Entry | Pd(OAc) <sub>2</sub> (mol%) | Bidentate ligand (mol%) | Pyridine ligand (mol%) | Yield of starting material and product (% , NMR) | D-content after reaction (NMR)           |
|-------|-----------------------------|-------------------------|------------------------|--------------------------------------------------|------------------------------------------|
| 1     | 10                          | 30                      | 20                     | 93                                               | Ortho - 3%<br>meta - 56.5%<br>para - 71% |
| 2     | 10                          | 15                      | 10                     | 92                                               | Ortho - 2.5%<br>meta - 55%<br>para - 69% |
| 3     | 10                          | 10                      | 10                     | 95                                               | Ortho - 0%<br>meta - 23%<br>para - 28%   |
| 4     | 10                          | 15                      | 5                      | 99                                               | Ortho - 1%<br>meta - 24%<br>para - 31%   |

**Scheme S3.13: Screening of time and catalyst loading.**

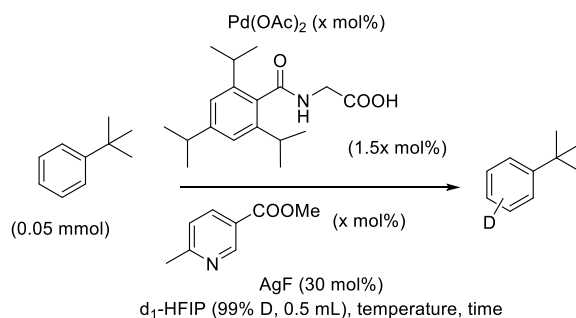

| Entry | Catalyst loading (x mol%) | reaction temperature (°C) | reaction time (h) | Yield of starting material and product (% , NMR) | D-content after reaction (NMR)             |
|-------|---------------------------|---------------------------|-------------------|--------------------------------------------------|--------------------------------------------|
| 1     | 10                        | 30                        | 18                | 93                                               | Ortho - 3%<br>meta - 56.5%<br>para - 71%   |
| 2     | 10                        | 30                        | 72                | 97                                               | Ortho - 5%<br>meta - 70.5%<br>para - 78%   |
| 3     | 10                        | 40                        | 48                | 100                                              | Ortho - 6%<br>meta - < 90%<br>para - < 90% |
| 4     | 10                        | 40                        | 72                | 97                                               | Ortho - 6%<br>meta - 93%<br>para - 93%     |
| 5     | 5                         | 40                        | 72                | 95                                               | Ortho - 4%<br>meta - < 85%<br>para - < 90% |

**Scheme S3.14:** Screening of reaction solvent.

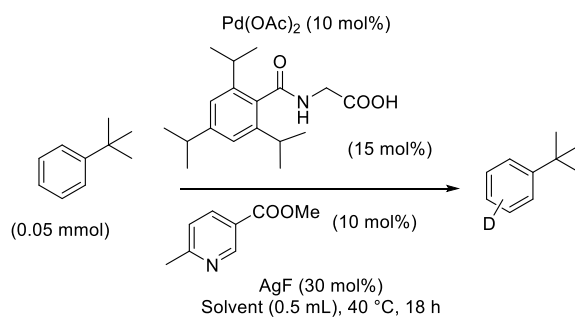

| Entry | Solvent                                              | Yield of starting material and product (% , NMR) | D-content after reaction (NMR)             |
|-------|------------------------------------------------------|--------------------------------------------------|--------------------------------------------|
| 1     | d <sub>4</sub> -MeOH                                 | 95                                               | ortho - 6%<br>meta - 8%<br>para - 7%       |
| 2     | d <sub>1</sub> -AcOH                                 | 99                                               | ortho - 0%<br>meta - 2.5%<br>para - 6%     |
| 3     | d <sub>1</sub> -TFA                                  | -                                                | ortho - 1%<br>meta - 1.5%<br>para - 5%     |
| 4     | HFIP:D <sub>2</sub> O (1:1)                          | 92                                               | ortho - 0%<br>meta - 46%<br>para - 60%     |
| 5     | d <sub>1</sub> -HFIP:DCE                             | -                                                | ortho - 1.5%<br>meta - 20.5%<br>para - 26% |
| 6     | d <sub>1</sub> -HFIP:MeCN                            | 99                                               | ortho - 0%<br>meta - 0%<br>para - 4%       |
| 7     | d <sub>1</sub> -HFIP:CHCl <sub>3</sub>               | 100                                              | ortho - 0%<br>meta - 0%<br>para - 0%       |
| 8     | d <sub>1</sub> -HFIP:CH <sub>2</sub> Cl <sub>2</sub> | 99                                               | ortho - 4%<br>meta - 22%<br>para - 28%     |
| 9     | d <sub>1</sub> -HFIP:THF                             | -                                                | ortho - 6%<br>meta - 11.5%<br>para - 17%   |
| 10    | d <sub>1</sub> -HFIP:d <sub>4</sub> -MeOH            | 100                                              | ortho - 4%<br>meta - 5.5%<br>para - 28%    |
| 11    | d <sub>1</sub> -HFIP:d <sub>1</sub> -AcOH            | 100                                              | ortho - 0%<br>meta - 0%<br>para - 4%       |
| 12    | d <sub>1</sub> -HFIP                                 | 97                                               | ortho - 4%<br>meta - 69%<br>para - 77%     |

**Scheme S3.15:** Screening of ratio of solvent mixture.

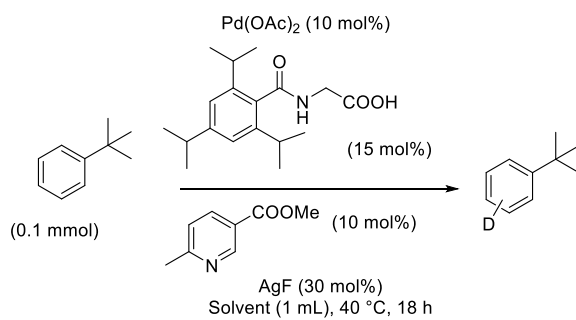

| Entry | D <sub>2</sub> O:HFIP ratio             | Yield of starting material and product (% , NMR) | D-content after reaction (NMR)           |
|-------|-----------------------------------------|--------------------------------------------------|------------------------------------------|
| 1     | 1 mL D <sub>2</sub> O<br>+ 2 equiv HFIP | 92                                               | ortho - 3.5%<br>meta - 13%<br>para - 18% |
| 2     | 9:1                                     | 90                                               | ortho - 2%<br>meta - 47.5%<br>para - 65% |
| 3     | 8:2                                     | 92                                               | ortho - 0%<br>meta - 57%<br>para - 76%   |
| 4     | 7:3                                     | 93                                               | ortho - 2%<br>meta - 57%<br>para - 75%   |
| 5     | 6:4                                     | 87                                               | ortho - 0%<br>meta - 49%<br>para - 66%   |
| 6     | 5:5                                     | 98                                               | ortho - 0%<br>meta - 50%<br>para - 68%   |
| 7     | 3:7                                     | 100                                              | ortho - 4%<br>meta - 30.5%<br>para - 43% |

**Scheme S3.16:** Comparison with d<sub>1</sub>-HFIP and D<sub>2</sub>O as solvent system.

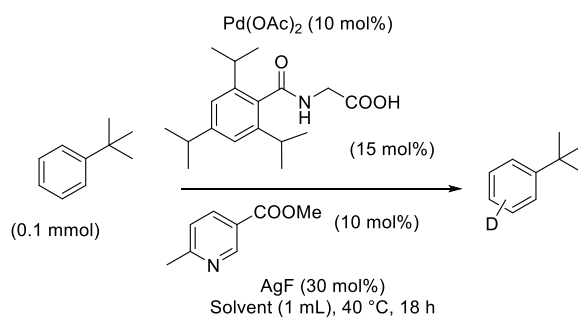

| Entry | D <sub>2</sub> O:d <sub>1</sub> -HFIP ratio | Yield of starting material and product (% , NMR) | D-content after reaction (NMR)           |
|-------|---------------------------------------------|--------------------------------------------------|------------------------------------------|
| 1     | 7:3                                         | 93                                               | ortho - 2%<br>meta - 58%<br>para - 73%   |
| 2     | 5:5                                         | 92                                               | ortho - 1.5%<br>meta - 56%<br>para - 74% |
| 3     | 3:7                                         | 90                                               | ortho - 0%<br>meta - 48%<br>para - 68%   |

**Scheme S3.17:** Effect of dilution.

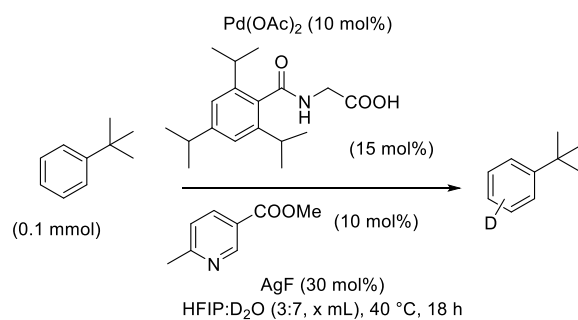

| Entry | Amount of Solvent | Yield of starting material and product (% , NMR) | D-content after reaction (NMR)         |
|-------|-------------------|--------------------------------------------------|----------------------------------------|
| 1     | 1                 | 93                                               | ortho - 0%<br>meta - 55%<br>para - 72% |
| 2     | 1.5               | 92                                               | ortho - 0%<br>meta - 60%<br>para - 76% |
| 3     | 2                 | 82                                               | ortho - 4%<br>meta - 68%<br>para - 83% |
| 4     | 3                 | 92                                               | ortho - 1%<br>meta - 62%<br>para - 77% |

**Scheme S3.18:** Screening of time.

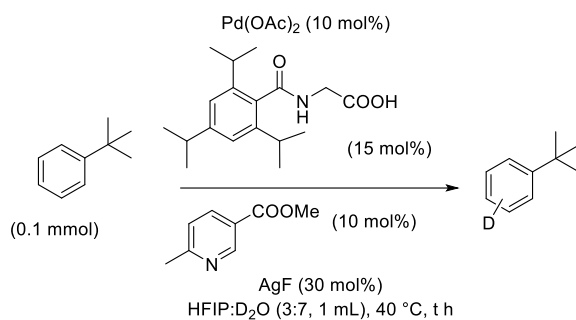

| Entry | Time | Further changes            | Yield of starting material and product (% , NMR) | D-content after reaction (NMR)             |
|-------|------|----------------------------|--------------------------------------------------|--------------------------------------------|
| 1     | 18   | none                       | 93                                               | ortho - 0%<br>meta - 55%<br>para - 72%     |
| 2     | 48   | none                       | 89                                               | ortho - 2%<br>meta - 84%<br>para - 92%     |
| 3     | 48   | only d <sub>1</sub> -HFIP  | 100                                              | Ortho - 6%<br>meta - < 90%<br>para - < 90% |
| 4     | 48   | 2 mL<br>of solvent mixture | > 90                                             | ortho - 2%<br>meta - 85-88%<br>para - >93% |
| 5     | 72   | none                       | 92                                               | ortho - 4%<br>meta - 92%<br>para - 95%     |
| 6     | 72   | only d <sub>1</sub> -HFIP  | 97                                               | Ortho - 6%<br>meta - 93%<br>para - 93%     |

**Scheme S3.19:** Screening of temperature with anisole.

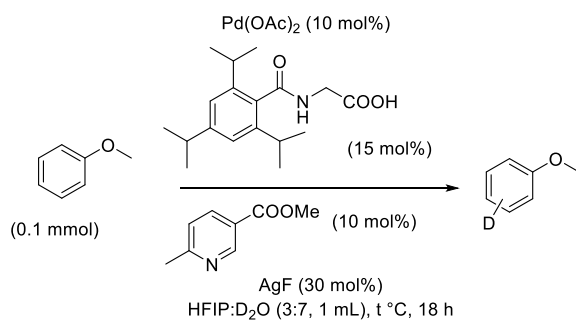

| Entry | Temperature | Further changes  | Yield of starting material and product (% , NMR) | D-content after reaction (NMR)                     |
|-------|-------------|------------------|--------------------------------------------------|----------------------------------------------------|
| 1     | 40          | none             | 100                                              | ortho - 13.5%<br>meta - >90%<br>para - >90%        |
| 2     | 40          | 72 h             | 100                                              | ortho - 15-20%<br>meta - 95-100%<br>para - 95-100% |
| 3     | 60          | none             | 89                                               | ortho - 45%<br>meta - 95-100%<br>para - 95-100%    |
| 4     | 80          | none             | 94                                               | ortho - 92%<br>meta - 95-100%<br>para - 95-100%    |
| 6     | 80          | <br>as substrate | 92                                               | ortho - 2.5%<br>meta - 20%<br>para - 7%            |

Note: A reaction mixture obtained under the optimized reaction Conditions A was analyzed by mass spectrometry and revealed that no deuteration incorporation occurs at the glycine-CH<sub>2</sub>-position of the bidentate ligand.



## 4 Optimization of the Reaction Conditions with Electron-Withdrawing Substituents

### General Procedure D:

An oven dried 10 mL Schlenk tube was charged with a Pd(OAc)<sub>2</sub>, a bidentate ligand, a pyridine ligand, if indicated an Ag-source, 1,1,1,3,3,3-hexafluoropropan-2-yl benzoate-d<sub>5</sub> or 1,1,1,3,3,3-hexafluoropropan-2-yl benzoate (0.100 mmol), and solvent. The reaction vessel was tightly sealed then placed into the inside circle of a preheated aluminum block with a tightly fitting recess on a magnetic stirrer and stirred at the indicated temperature until completion of the reaction. The reaction mixture was allowed to cool to room temperature and 1,3,5-trimethylbenzene was added as an internal standard. The reaction mixture was filtered over a pad of Celite<sup>®</sup> and the residue was washed with dichloromethane. The overall solution was concentrated under reduced pressure and CDCl<sub>3</sub> (0.9 mL) was added. All yields and deuteration degrees during the optimization study were determined via <sup>1</sup>H-NMR of the crude reaction using 1,3,5-trimethylbenzene as an internal standard.

**Scheme S4.1:** Screening of silver salts.

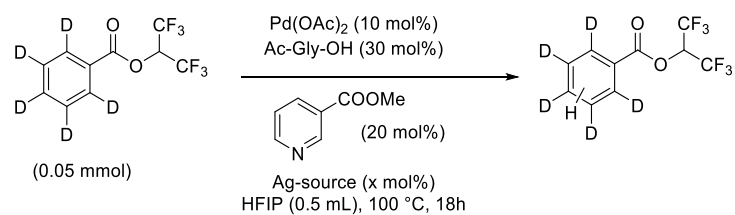

| Entry | Ag-source                          | Yield of starting material and product (% , NMR) | H-content after reaction (NMR)            |
|-------|------------------------------------|--------------------------------------------------|-------------------------------------------|
| 1     | $\text{AgOAc}$ (50 mol%)           | 66                                               | Ortho - 4%<br>meta - 7%<br>para - 2%      |
| 2     | $\text{AgF}$ (50 mol%)             | -                                                | Ortho - 7.5%<br>meta - 12.5%<br>para - 4% |
| 3     | $\text{Ag}_2\text{CO}_3$ (25 mol%) | 81                                               | Ortho - 4%<br>meta - 7%<br>para - 2%      |
| 4     | $\text{AgNO}_3$ (50 mol%)          | 89                                               | Ortho - 4.5%<br>meta - 8.5%<br>para - 3%  |

### Scheme S4.2: Screening of pyridine ligands.

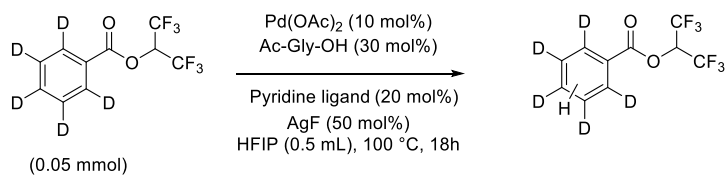

| Entry | Pyridine ligand                                                                     | Yield of starting material and product (% , NMR) | H-content after reaction (NMR)               |
|-------|-------------------------------------------------------------------------------------|--------------------------------------------------|----------------------------------------------|
| 1     | 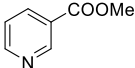   | 84                                               | Ortho - 7%<br>meta - 11%<br>para - 3%        |
| 2     |    | 83                                               | Ortho - 6.5%<br>meta - 23.5%<br>para - 6%    |
| 3     |    | 83                                               | Ortho - 2.5%<br>meta - 10%<br>para - 6%      |
| 4     |    | 87                                               | Ortho - 4.5%<br>meta - 17%<br>para - 7.5%    |
| 5     |   | 93                                               | Ortho - 2.5%<br>meta - 7%<br>para - No data  |
| 6     |  | 88                                               | Ortho - 7%<br>meta - 8.5%<br>para - 2%       |
| 7     |  | 74                                               | Ortho - 6.5%<br>meta - 15.5%<br>para - 4%    |
| 8     |  | 76                                               | Ortho - 7%<br>meta - 22.5%<br>para - 5%      |
| 9     |  | 76                                               | Ortho - 1.5%<br>meta - 16%<br>para - No data |

**Scheme S4.3:** Screening of amino-acid derived ligands.

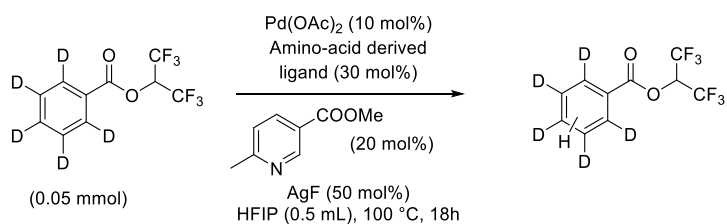

| Entry | Amino-acid derived ligand | Yield of starting material and product (% , NMR) | H-content after reaction (NMR)            |
|-------|---------------------------|--------------------------------------------------|-------------------------------------------|
| 1     | Ac-Gly-OH                 | 83                                               | Ortho - 6.5%<br>meta - 23.5%<br>para - 9% |
| 2     |                           | 78                                               | Ortho - 1%<br>meta - 4.5%<br>para - 1%    |
| 3     |                           | 22                                               | Ortho - 1.5%<br>meta - 7%<br>para - 4%    |
| 4     |                           | 68                                               | Ortho - 1%<br>meta - 5.5%<br>para - 1%    |
| 5     |                           | 64                                               | Ortho - 3%<br>meta - 13%<br>para - 4%     |
| 6     |                           | 85                                               | Ortho - 2%<br>meta - 20%<br>para - 4%     |
| 7     |                           | 20                                               | Ortho - 3.5%<br>meta - 22%<br>para - 5%   |
| 8     |                           | 80                                               | Ortho - 1%<br>meta - 3.5%<br>para - 1%    |

### Scheme S4.4: Screening of bidentate ligands.

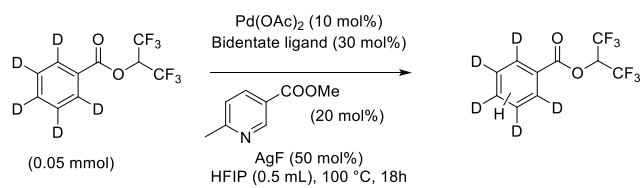

| Entry | Bidentate ligand | Yield of starting material and product (in %, NMR) | H-content after reaction (NMR)             |
|-------|------------------|----------------------------------------------------|--------------------------------------------|
| 1     | Ac-Gly-OH        | 80                                                 | Ortho - 7%<br>meta - 24%<br>para - 8%      |
| 2     |                  | 76                                                 | Ortho - 6%<br>meta - 28.5%<br>para - 10%   |
| 3     |                  | 78                                                 | Ortho - 7.5%<br>meta - 32.5%<br>para - 12% |
| 4     |                  | 78                                                 | Ortho - 2.5%<br>meta - 16%<br>para - 5%    |
| 5     |                  | 92                                                 | Ortho - 3%<br>meta - 22%<br>para - 7%      |

**Scheme S4.5:** Screening of temperature.

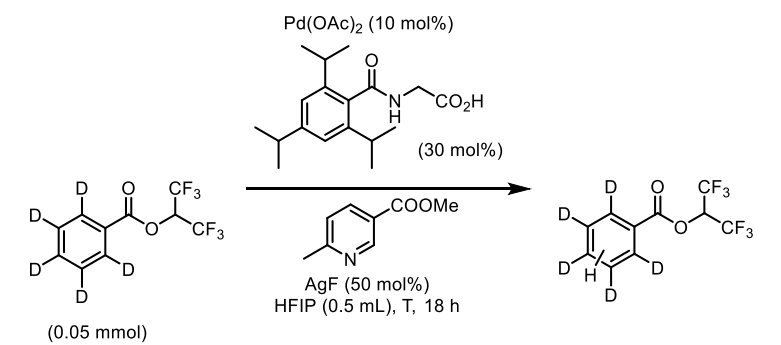

| Entry | Temperature | Yield of starting material and product (% , NMR) | H-content after reaction (NMR)              |
|-------|-------------|--------------------------------------------------|---------------------------------------------|
| 1     | 90          | 74                                               | Ortho - 5%<br>meta - 20%<br>para - 7%       |
| 2     | 100         | 86                                               | Ortho - 7.5%<br>meta - 32%<br>para - 12%    |
| 3     | 110         | 88                                               | Ortho - 10%<br>meta - 41%<br>para - 16%     |
| 4     | 120         | 84                                               | Ortho - 16.5%<br>meta - 59%<br>para - 26%   |
| 5     | 130         | 92                                               | Ortho - 17.5%<br>meta - 58.5%<br>para - 26% |

**Scheme S4.6:** Screening of amount of Ag-source.

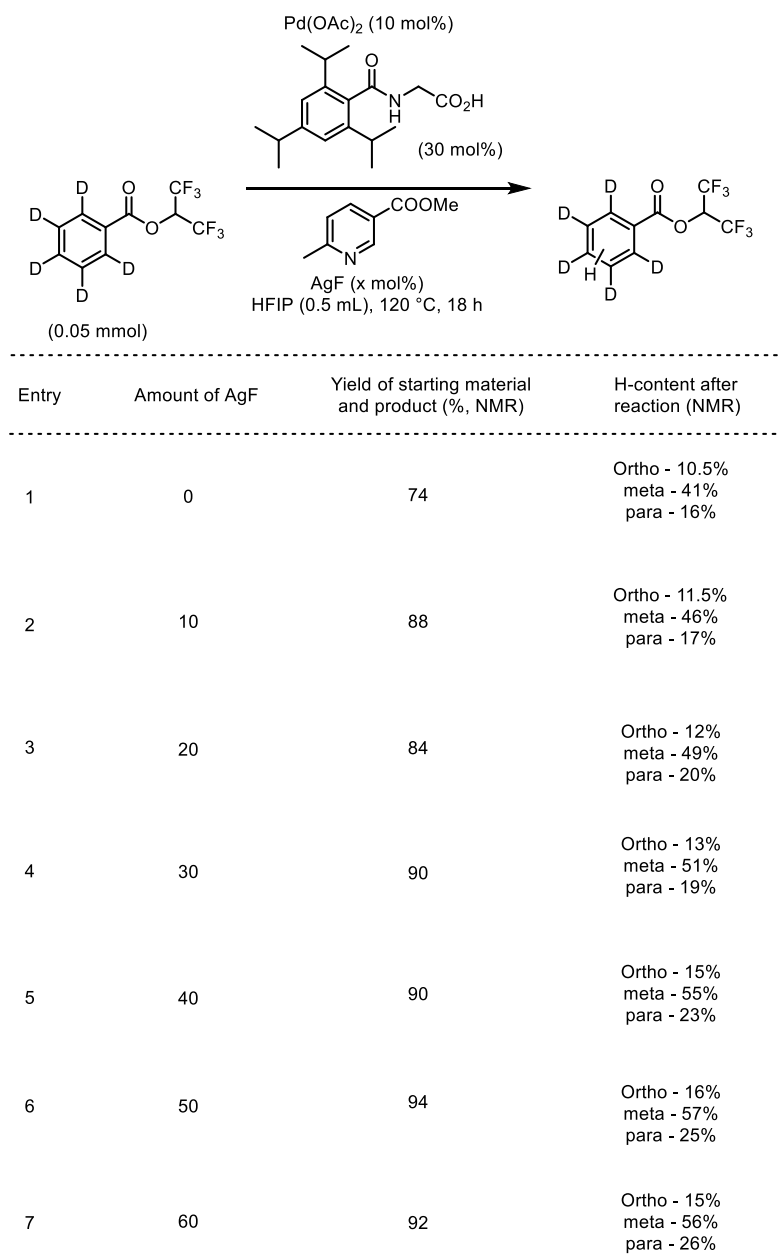

**Scheme S4.7:** Re-screening of bidentate ligands.

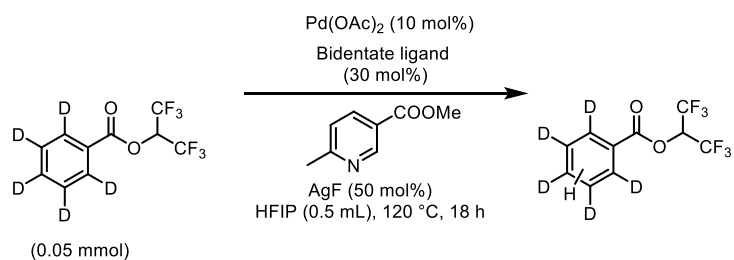

| Entry | Bidentate ligand | Yield of starting material and product (%; NMR) | H-content after reaction (NMR)          |
|-------|------------------|-------------------------------------------------|-----------------------------------------|
| 1     |                  | 86                                              | Ortho - 14%<br>meta - 54%<br>para - 22% |
| 2     |                  | 90                                              | Ortho - 4%<br>meta - 25.5%<br>para - 9% |
| 3     |                  | 92                                              | Ortho - 4%<br>meta - 37%<br>para - 13%  |
| 4     |                  | 92                                              | Ortho - 5%<br>meta - 52%<br>para - 18%  |
| 5     |                  | 96                                              | Ortho - 7%<br>meta - 72%<br>para - 30%  |



**Scheme S4.8:** Screening of ratio between catalyst components.

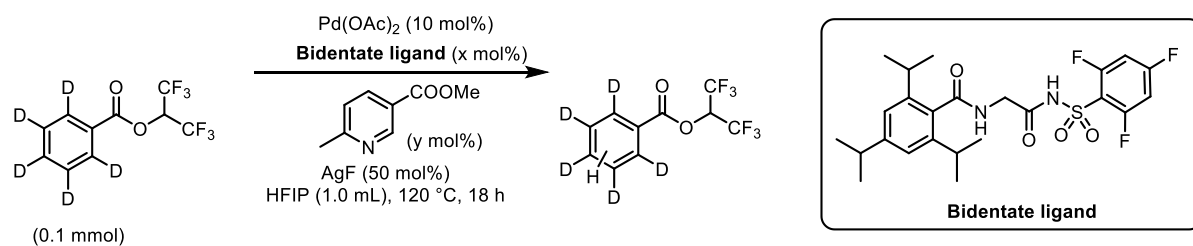

| Entry | Pd(OAc) <sub>2</sub> | Bidentate ligand | Pyridine ligand | Yield of starting material and product (% , NMR) | H-content after reaction (NMR)             |
|-------|----------------------|------------------|-----------------|--------------------------------------------------|--------------------------------------------|
| 1     | 1                    | 1                | 1               | 88                                               | Ortho - 3.5%<br>meta - 45%<br>para - 16%   |
| 2     | 1                    | 1                | 2               | 83                                               | Ortho - 5.5%<br>meta - 59.5%<br>para - 24% |
| 3     | 1                    | 1                | 3               | 85                                               | Ortho - 5%<br>meta - 59%<br>para - 23%     |
| 4     | 1                    | 2                | 1               | 91                                               | Ortho - 4%<br>meta - 49%<br>para - 17%     |
| 5     | 1                    | 2                | 2               | 89                                               | Ortho - 7%<br>meta - 68.5%<br>para - 31%   |
| 6     | 1                    | 2                | 3               | 91                                               | Ortho - 9%<br>meta - 73%<br>para - 34%     |
| 7     | 1                    | 3                | 1               | 88                                               | Ortho - 4.5%<br>meta - 55.5%<br>para - 21% |
| 8     | 1                    | 3                | 2               | 94                                               | Ortho - 6.5%<br>meta - 72.5%<br>para - 30% |
| 9     | 1                    | 3                | 3               | 96                                               | Ortho - 7.5%<br>meta - 72.5%<br>para - 33% |

**Scheme S4.9:** Control experiments.

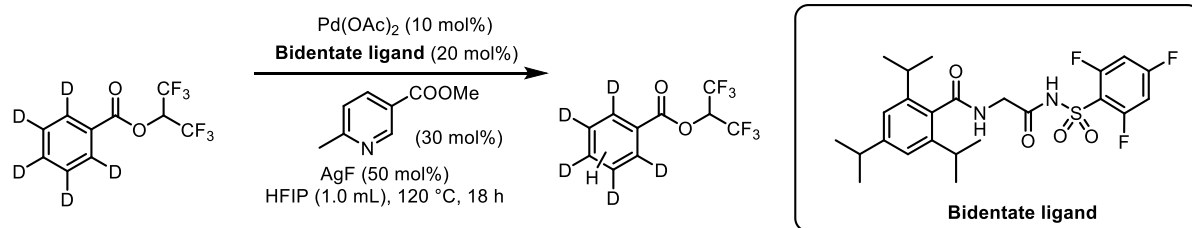

| Entry | Deviation from standard conditions | Yield of starting material and product (% , NMR) | H-content after reaction (NMR)            |
|-------|------------------------------------|--------------------------------------------------|-------------------------------------------|
| 1     | None                               | 87                                               | ortho - 7.5%<br>meta - 70%<br>para - 30%  |
| 2     | no bidentate ligand                | 86                                               | ortho - 0%<br>meta - 0%<br>para - 0%      |
| 3     | no pyridine ligand                 | 83                                               | ortho - 1%<br>meta - 2%<br>para - 1%      |
| 4     | no Pd(OAc) <sub>2</sub>            | 94                                               | ortho - 1%<br>meta - 2%<br>para - 1%      |
| 5     | no catalyst                        | 97                                               | ortho - 1%<br>meta - 0.5%<br>para - 0.5%  |
| 6     | no AgF                             | 97                                               | ortho - 8.5%<br>meta - 74%<br>para - 34%  |
| 7     | instead of                         | 93                                               | ortho - 4.5%<br>meta - 54%<br>para - 26%  |
| 8     | instead of                         | 90                                               | ortho - 13%<br>meta - 36%<br>para - 13%   |
| 9     | instead of                         | 96                                               | ortho - 10.5%<br>meta - 73%<br>para - 35% |

**Scheme S4.10:** Screening of silver-salt loading.

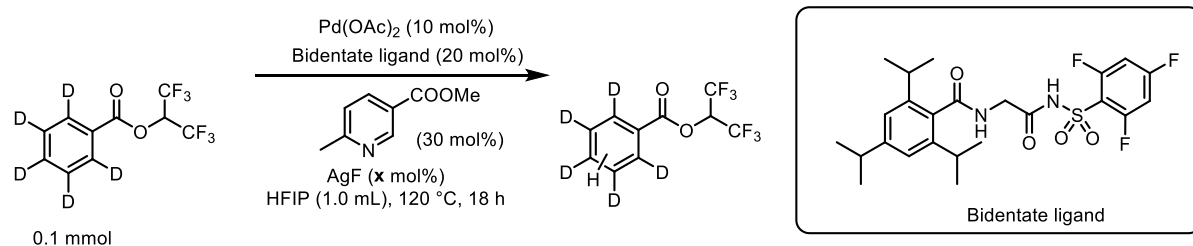

| Entry           | AgF (mol%) | Yield of starting material and product (%; NMR) | H-content after reaction (NMR)           |
|-----------------|------------|-------------------------------------------------|------------------------------------------|
| 1               | 0          | 83                                              | ortho - 7%<br>meta - 70%<br>para - 30%   |
| 2               | 10         | 83                                              | ortho - 7%<br>meta - 70.5%<br>para - 32% |
| 3               | 20         | 87                                              | ortho - 7%<br>meta - 71%<br>para - 32%   |
| 4               | 30         | 88                                              | ortho - 7%<br>meta - 71.5%<br>para - 32% |
| 5               | 40         | 91                                              | ortho - 7.5%<br>meta - 69%<br>para - 30% |
| 6               | 50         | 91                                              | ortho - 6%<br>meta - 66%<br>para - 29%   |
| 7               | 60         | 95                                              | ortho - 7%<br>meta - 65%<br>para - 30%   |
| 8               | 70         | 98                                              | ortho - 6%<br>meta - 63%<br>para - 26%   |
| 9 <sup>a</sup>  | 0          | 97                                              | ortho - 10%<br>meta - 72%<br>para - 36%  |
| 10 <sup>a</sup> | 10         | 92                                              | ortho - 10%<br>meta - 71%<br>para - 34%  |

a: 3-Trifluoroquinoline was used as Ligand

**Scheme S4.11:** Deuteration reaction at different reactions times.

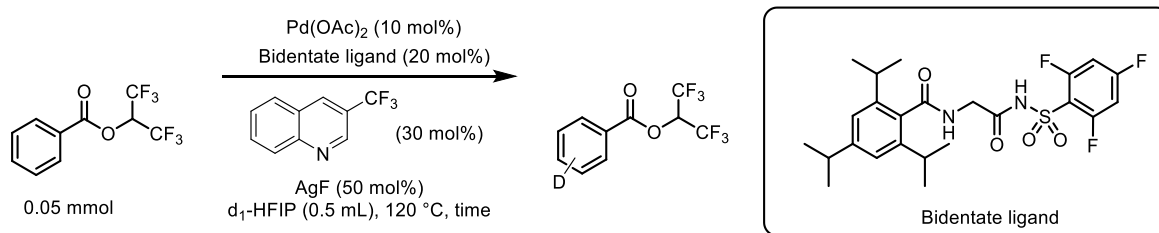

| Entry | Time (in h) | Yield of starting material and product (% , NMR) | D-content after reaction (NMR)            |
|-------|-------------|--------------------------------------------------|-------------------------------------------|
| 1     | 18          | quant                                            | ortho - 18.5%<br>meta - 86%<br>para - 62% |
| 2     | 48          | quant                                            | ortho - 36%<br>meta - 86%<br>para - 86%   |

**Scheme S4.12:** Deuteration reaction with different solvents.

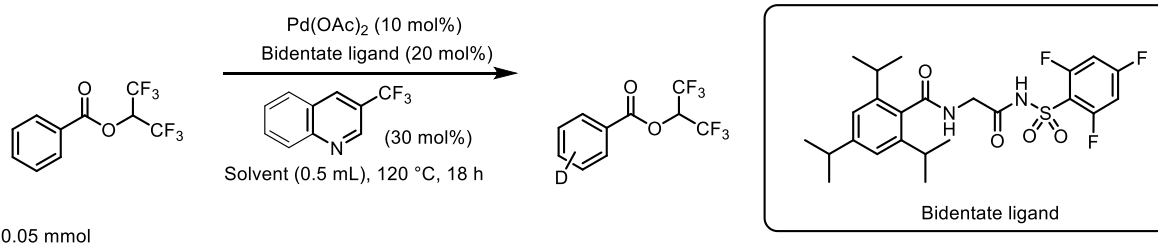

| Entry | Solvent                                              | Yield of starting material and product (%; NMR) | D-content after reaction (NMR)            |
|-------|------------------------------------------------------|-------------------------------------------------|-------------------------------------------|
| 1     | d <sub>4</sub> -MeOH                                 | 88                                              | ortho - 2.5%<br>meta - 16%<br>para - 3%   |
| 2     | d <sub>1</sub> -AcOH                                 | 100                                             | ortho - 6%<br>meta - 15%<br>para - 7%     |
| 3     | d <sub>1</sub> -TFA                                  | 86                                              | ortho - 0%<br>meta - 0%<br>para - 0%      |
| 4     | HFIP:D <sub>2</sub> O (1:1)                          | 96                                              | ortho - 31.5%<br>meta - 89%<br>para - 75% |
| 5     | HFIP:D <sub>2</sub> O (9:1)                          | 98                                              | ortho - 19%<br>meta - 58%<br>para - 40%   |
| 6     | d <sub>1</sub> -HFIP:DCE                             | 100                                             | ortho - 23.5%<br>meta - 84%<br>para - 70% |
| 7     | d <sub>1</sub> -HFIP:MeCN                            | 100                                             | ortho - 7%<br>meta - 22%<br>para - 6%     |
| 8     | d <sub>1</sub> -HFIP:CHCl <sub>3</sub>               | 84                                              | ortho - 18.5%<br>meta - 82%<br>para - 60% |
| 9     | d <sub>1</sub> -HFIP:CH <sub>2</sub> Cl <sub>2</sub> | 88                                              | ortho - 15%<br>meta - 76%<br>para - 45%   |
| 10    | d <sub>1</sub> -HFIP:THF                             | 95                                              | ortho - 12%<br>meta - 64%<br>para - 30%   |
| 11    | d <sub>1</sub> -HFIP:d <sub>4</sub> -MeOH            | 86                                              | ortho - 8%<br>meta - 46%<br>para - 10%    |
| 12    | d <sub>1</sub> -HFIP:d <sub>1</sub> -AcOH            | 94                                              | ortho - 4.5%<br>meta - 26%<br>para - 8%   |

**Scheme S4.13:** Screening of different D<sub>2</sub>O:HFIP ratios.

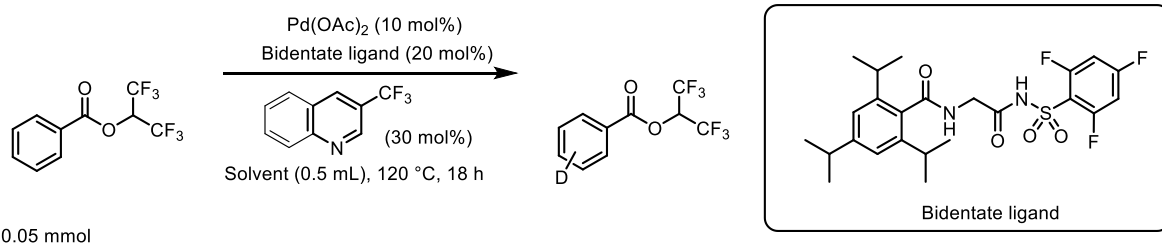

| Entry | D <sub>2</sub> O:HFIP ratio | Yield of starting material and product (% , NMR) | D-content after reaction (NMR)            |
|-------|-----------------------------|--------------------------------------------------|-------------------------------------------|
| 1     | 100% D <sub>2</sub> O       | 100                                              | ortho - 0%<br>meta - 5%<br>para - 0%      |
| 2     | 9:1                         | 100                                              | ortho - 0%<br>meta - 3%<br>para - 3%      |
| 3     | 8:2                         | 96                                               | ortho - 28.5%<br>meta - 92%<br>para - 75% |
| 4     | 7:3                         | 94                                               | ortho - 39%<br>meta - 94.5%<br>para - 89% |
| 5     | 6:4                         | 96                                               | ortho - 36%<br>meta - 92.5%<br>para - 86% |
| 6     | 1:1                         | 100                                              | ortho - 33%<br>meta - 92%<br>para - 77%   |
| 7     | 4:6                         | 94                                               | ortho - 15%<br>meta - 77.5%<br>para - 52% |
| 8     | 3:7                         | 98                                               | ortho - 20%<br>meta - 77%<br>para - 54%   |

**Scheme S4.14:** Screening of the reaction concentration.

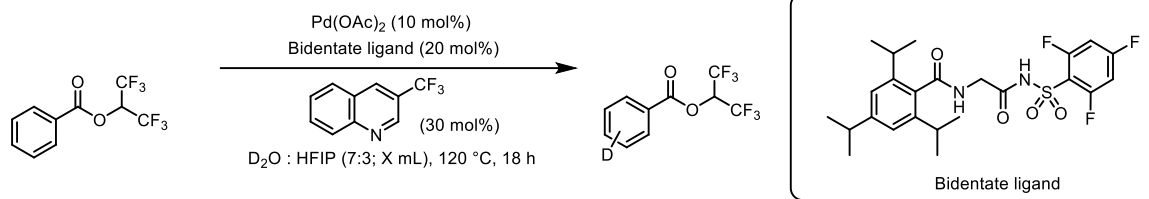

0.1 mmol

| Entry | Amount of solvent / Concentration | Yield of starting material and product (% , NMR) | D-content after reaction (NMR)              |
|-------|-----------------------------------|--------------------------------------------------|---------------------------------------------|
| 1     | 0.5 mL / 0.2 M                    | quant                                            | ortho - 42%<br>meta - 94%<br>para - 87%     |
| 2     | 1.0 mL / 0.1 M                    | 97                                               | ortho - 41%<br>meta - 95%<br>para - 88%     |
| 3     | 1.5 mL / 0.075 M                  | quant                                            | ortho - 47%<br>meta - 96%<br>para - 88%     |
| 4     | 2.0 mL / 0.05 M                   | quant                                            | ortho - 37.5%<br>meta - 95.5%<br>para - 82% |

**Scheme S4.15:** Cross-screening of different D<sub>2</sub>O:HFIP volumes and reaction times.

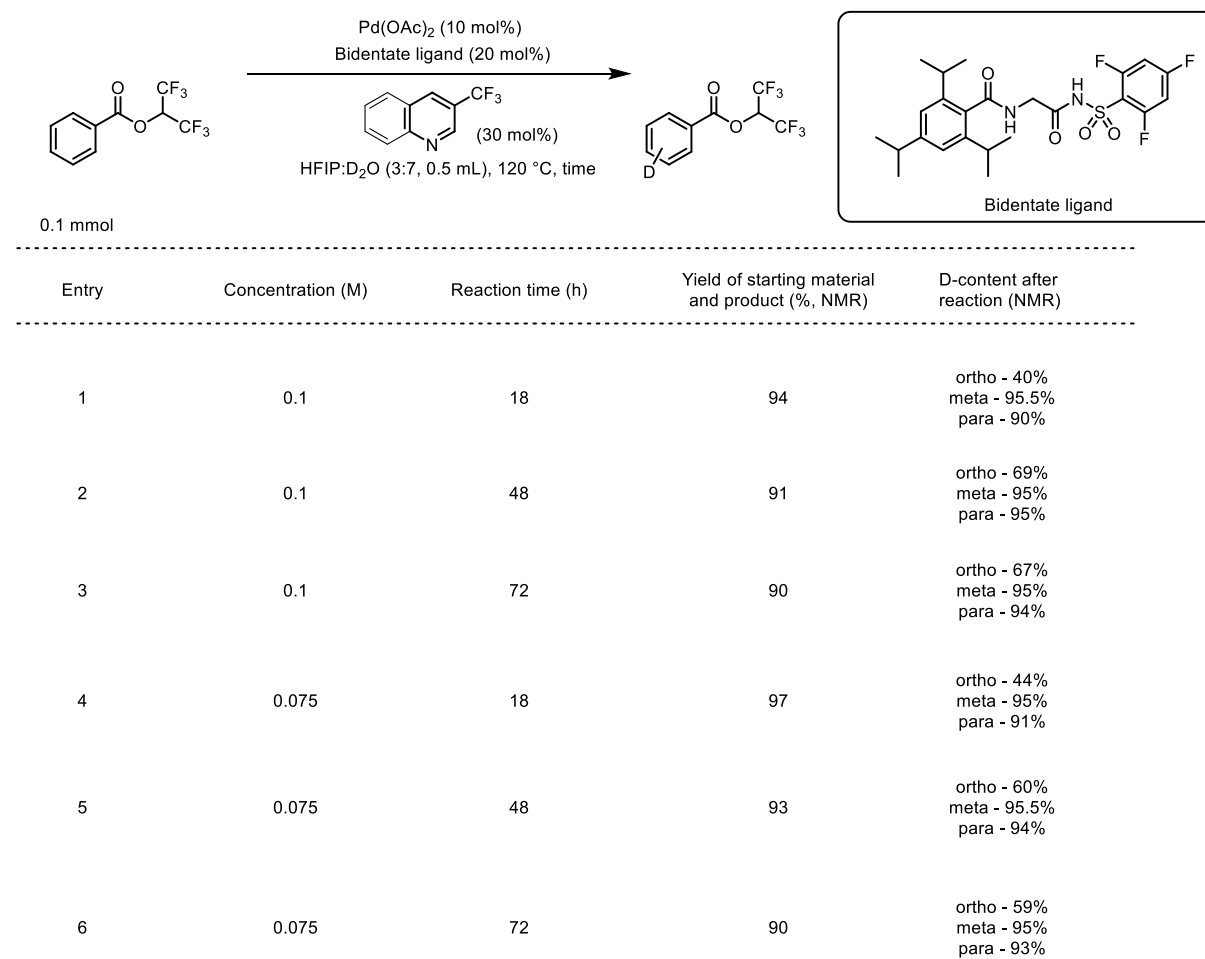

Note: A reaction mixture obtained under the optimized Conditions B was analyzed by mass spectrometry: No bidentate ligand was detected. Since this ligand can in principle be characterized through mass spectrometry, this result implies that the ligand decomposes in the reaction mixture after the reaction is completed. It could therefore not be evaluated if deuterium incorporation occurs in the bidentate ligand backbone.



**Scheme S4.16:** Use of d<sub>1</sub>-HFIP with D<sub>2</sub>O.

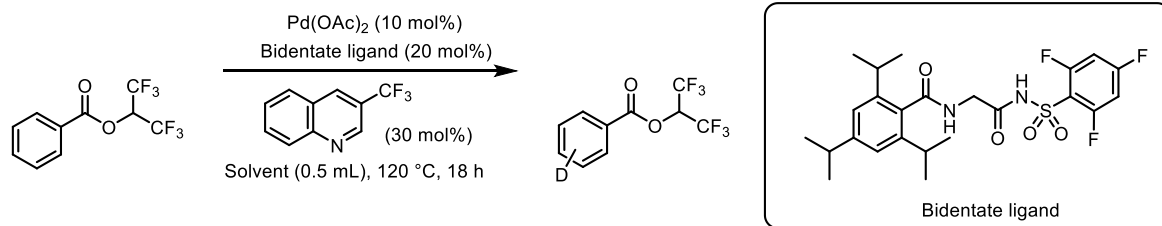

| Entry | D <sub>2</sub> O : d <sub>1</sub> -HFIP ratio | Yield of starting material and product (% , NMR) | D-content after reaction (NMR)              |
|-------|-----------------------------------------------|--------------------------------------------------|---------------------------------------------|
| 1     | 9:1                                           | 98                                               | ortho - 0%<br>meta - 8%<br>para - 5%        |
| 2     | 7:3                                           | 96                                               | ortho - 35%<br>meta - 95%<br>para - 88%     |
| 3     | 1:1                                           | 100                                              | ortho - 32.5%<br>meta - 94.5%<br>para - 86% |

**Scheme S4.17:** Control experiments.

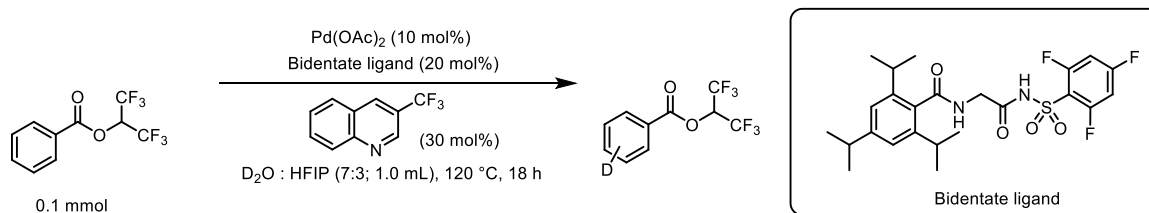

| Entry | Deviation from standard conditions | Yield of starting material and product (% , NMR) | D-content after reaction (NMR)          | D Total (MS) |
|-------|------------------------------------|--------------------------------------------------|-----------------------------------------|--------------|
| 1     | none                               | 95                                               | ortho - 39%<br>meta - 95%<br>para - 84% | 3.51         |
| 2     | no 3-trifluoromethyl quinoline     | 99                                               | ortho - 34%<br>meta - 60%<br>para - 32% | 2.15         |
| 3     | no bidentate ligand                | 98                                               | -                                       | 0            |
| 4     | no ligands added                   | 92                                               | -                                       | 0            |

**Scheme S4.18:** Comparison of amino acid-derived ligand.

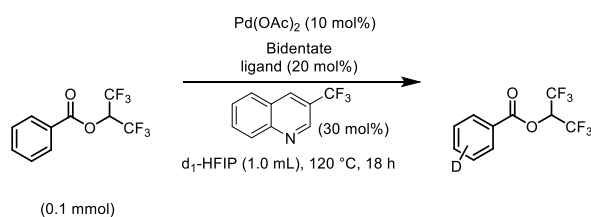

| Entry            | Bidentate ligand | Yield of starting material and product (%; NMR) | H-content after reaction (NMR)            |
|------------------|------------------|-------------------------------------------------|-------------------------------------------|
| 1                |                  | 99                                              | Ortho - 11%<br>meta - 50%<br>para - 23%   |
| 2                |                  | 95                                              | Ortho - 22%<br>meta - 73%<br>para - 41%   |
| 3                |                  | 97                                              | Ortho - 24.5%<br>meta - 79%<br>para - 47% |
| 4                |                  | 98                                              | Ortho - 5%<br>meta - 46%<br>para - 23%    |
| 5                |                  | 98                                              | Ortho - 7%<br>meta - 35%<br>para - 21%    |
| 6                |                  | 97                                              | Ortho - 5%<br>meta - 72%<br>para - 46%    |
| 7                |                  | 97                                              | Ortho - 17%<br>meta - 90%<br>para - 74%   |
| 8 <sup>a</sup>   |                  | 95                                              | Ortho - 32%<br>meta - 90%<br>para - 85%   |
| 9 <sup>a,b</sup> |                  | 94                                              | Ortho - 62%<br>meta - 95%<br>para - 95%   |

a: Reaction was conducted with 48 h reaction time  
 b: Reaction was conducted with D<sub>2</sub>O:HFIP (7:3) as solvent

## 5 Scope of the Reaction

### General Procedure E:

An oven dried 10 mL Schlenk tube was charged with Pd(OAc)<sub>2</sub> (4.5 mg, 10 mol%), (2,4,6-triisopropylbenzoyl)glycine (**L3**) (9.2 mg, 15 mol%), methyl 6-methylnicotinate (3.0 mg, 10 mol%), AgF (7.6 mg, 30 mol%), and arene (0.200 mmol). HFIP (0.6 mL) and D<sub>2</sub>O (1.4 mL) were added, the reaction vessel was tightly sealed and placed into the inside circle of a preheated aluminum block with a tightly fitting recess at 80 °C on a magnetic stirrer and stirred for 18 h. The reaction mixture was allowed to cool to room temperature, transferred into a 100 mL round-bottom flask, and concentrated under reduced pressure. The product was then purified according to the procedure described for the respective substrate.

### General Procedure F:

An oven dried 10 mL Schlenk tube was charged with Pd(OAc)<sub>2</sub> (4.5 mg, 10 mol%), (2,4,6-triisopropyl-*N*-(2-oxo-2-((2,4,6-trifluorophenyl)sulfonamido)ethyl)benzamide (**L7**) (20.0 mg, 20 mol%), 3-(trifluoromethyl)quinoline (11.8 mg, 30 mol%), and arene (0.200 mmol). HFIP (0.6 mL) and D<sub>2</sub>O (1.4 mL) were added, the reaction vessel was tightly sealed and placed into the inside circle of a preheated aluminum block with a tightly fitting recess at 120 °C on a magnetic stirrer and stirred for 48 h. The reaction mixture was allowed to cool to room temperature, transferred into a 100 mL round-bottom flask, and concentrated under reduced pressure. The product was then purified according to the procedure described for the respective substrate.

## Deuteration of cyclohexylbenzene (**2**):

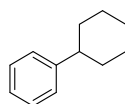

Following the general procedure E, but at 40 °C for 72 h, using cyclohexylbenzene (**2**) (32.0 mg, 0.200 mmol), and purification via silica gel column chromatography using pentane as the eluent the target compound [**D**]**2** was obtained as colorless liquid (29.4 mg, 89%). The degree of deuteration was determined by mass spectrometry.

**Deuterium Incorporation:** 4.22 D/molecule [Mass]; 4.25 D/molecule [<sup>1</sup>H-NMR].

### NMR Data of Starting Material:

<sup>1</sup>H NMR (600 MHz, CDCl<sub>3</sub>) δ = 7.36-7.30 (m, 1H), 7.28-7.23 (m, 1H), 7.24-7.19 (m, 1H), 2.59-2.49 (m, 1H), 1.99-1.84 (m, 4H), 1.84-1.76 (m, 1H), 1.54-1.39 (m, 4H), 1.37-1.26 (m, 1H) ppm.

<sup>13</sup>C NMR (100 MHz, CDCl<sub>3</sub>) δ = 148.2, 128.4, 126.9, 125.9, 44.8, 34.6, 27.1, 26.3 ppm.

### NMR Data of Product:

<sup>1</sup>H NMR (400 MHz, CDCl<sub>3</sub>) δ = 7.34-7.28 (m, 0.21H, 89.5% D), 7.26-7.20 (m, 0.45H, 77.5% D), 7.20 (s, 0.09H, 91% D), 2.60-2.45 (m, 1H), 1.95-1.82 (m, 4H), 1.81-1.72 (m, 1H), 1.51-1.35 (m, 4H), 1.34-1.23 (m, 1H) ppm.

<sup>13</sup>C NMR (100 MHz, CDCl<sub>3</sub>) δ = 148.4-147.9 (1C), 128.4-125.0 (5C), 44.8-44.6 (1C), 34.6, 27.1, 26.3 ppm.

### Mass Data:

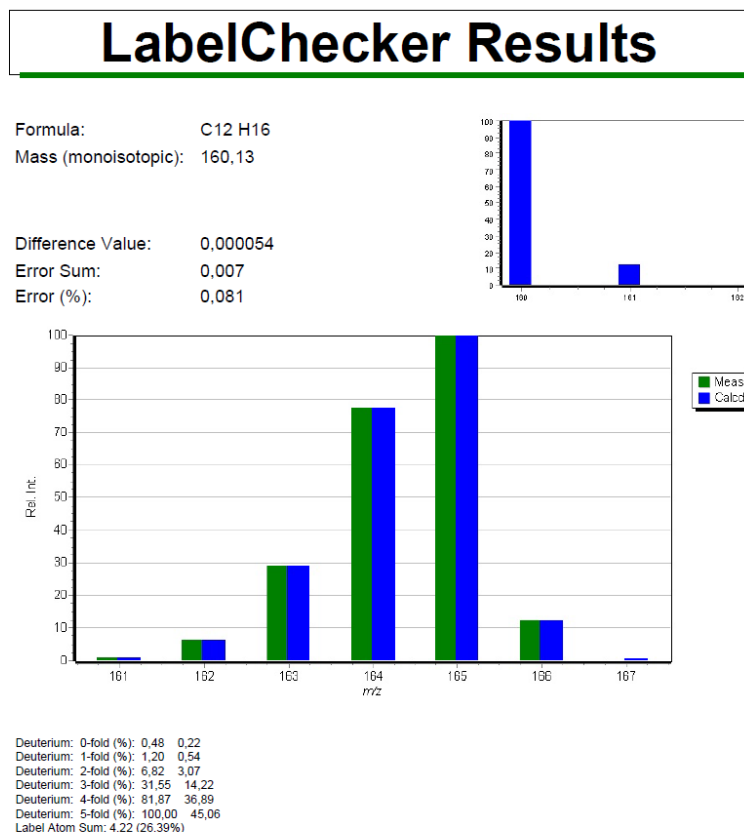

**<sup>1</sup>H-NMR spectrum in CDCl<sub>3</sub>:**

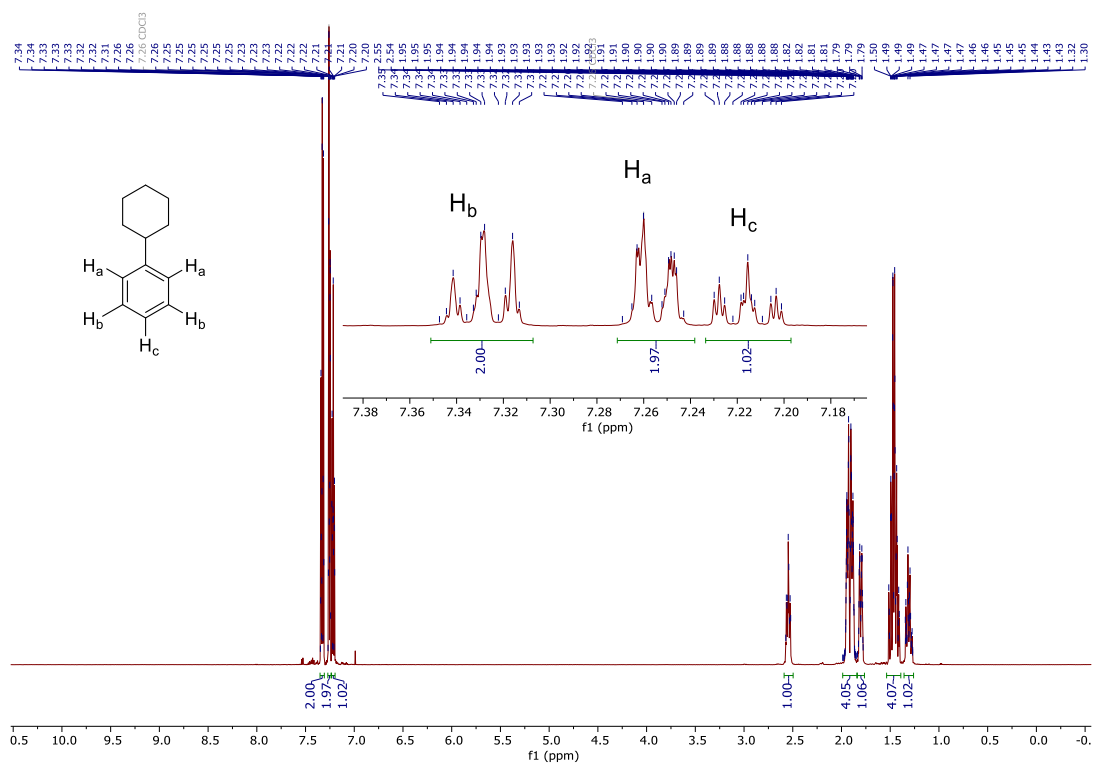

**<sup>1</sup>H-NMR spectrum in CDCl<sub>3</sub>:**

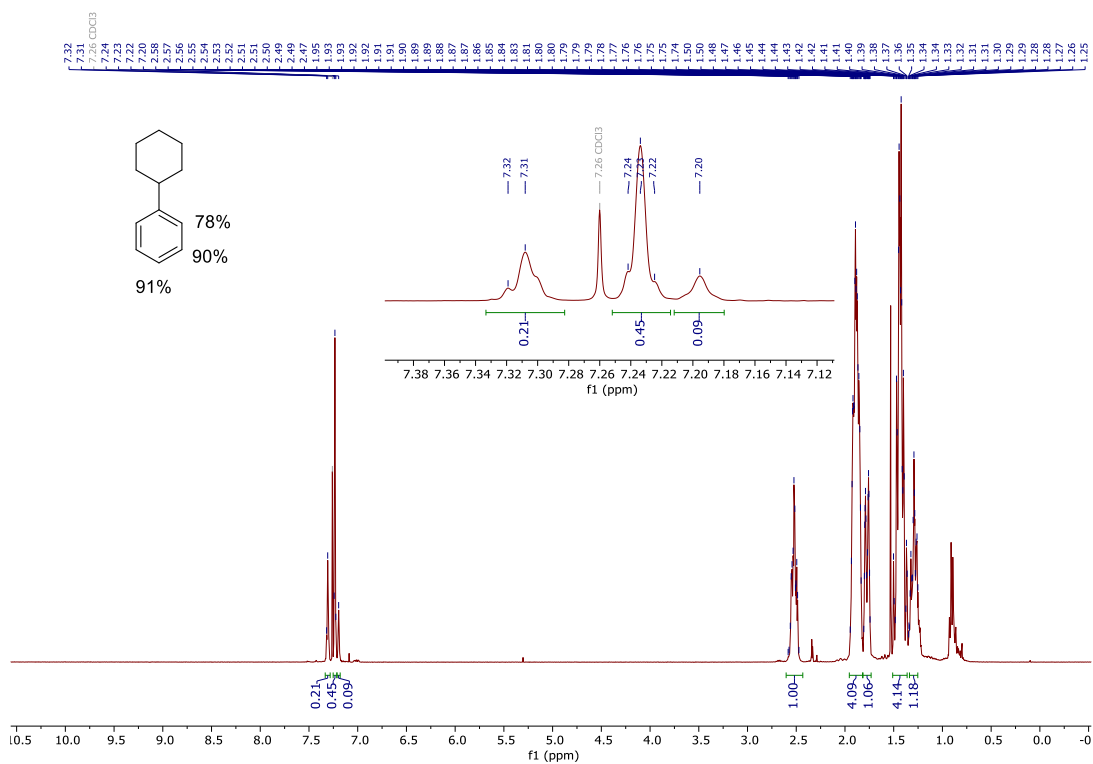

**<sup>13</sup>C-NMR spectrum in CDCl<sub>3</sub>:**

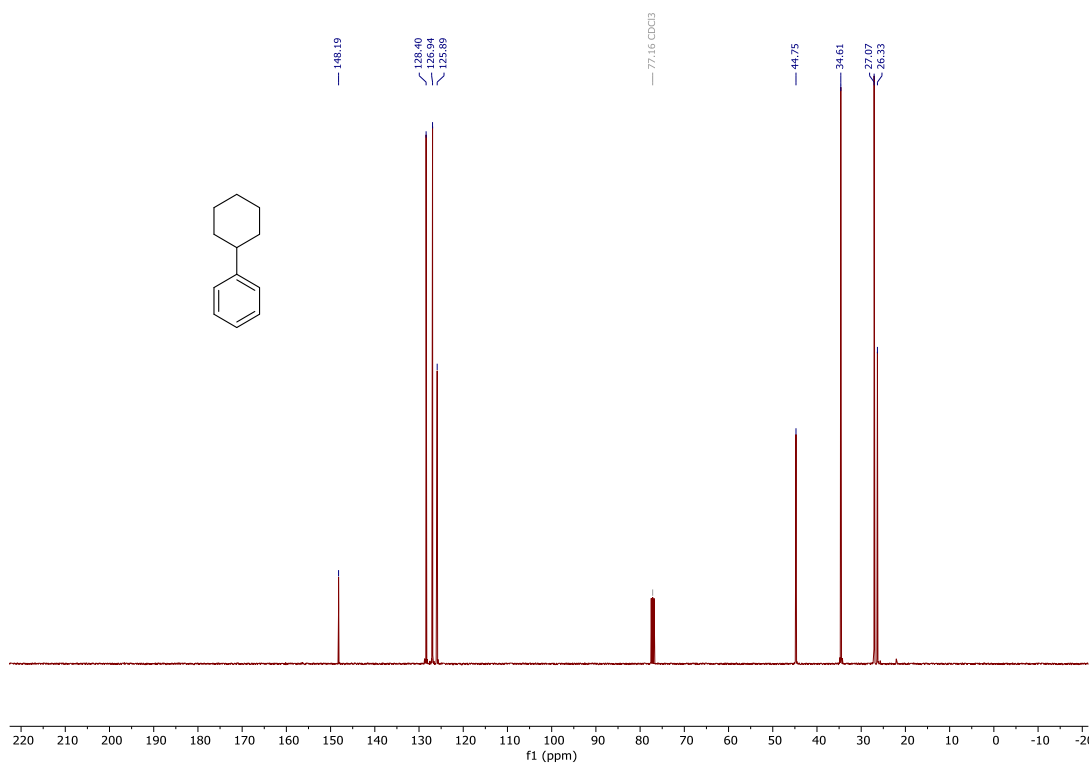

**<sup>13</sup>C-NMR spectrum in CDCl<sub>3</sub>:**

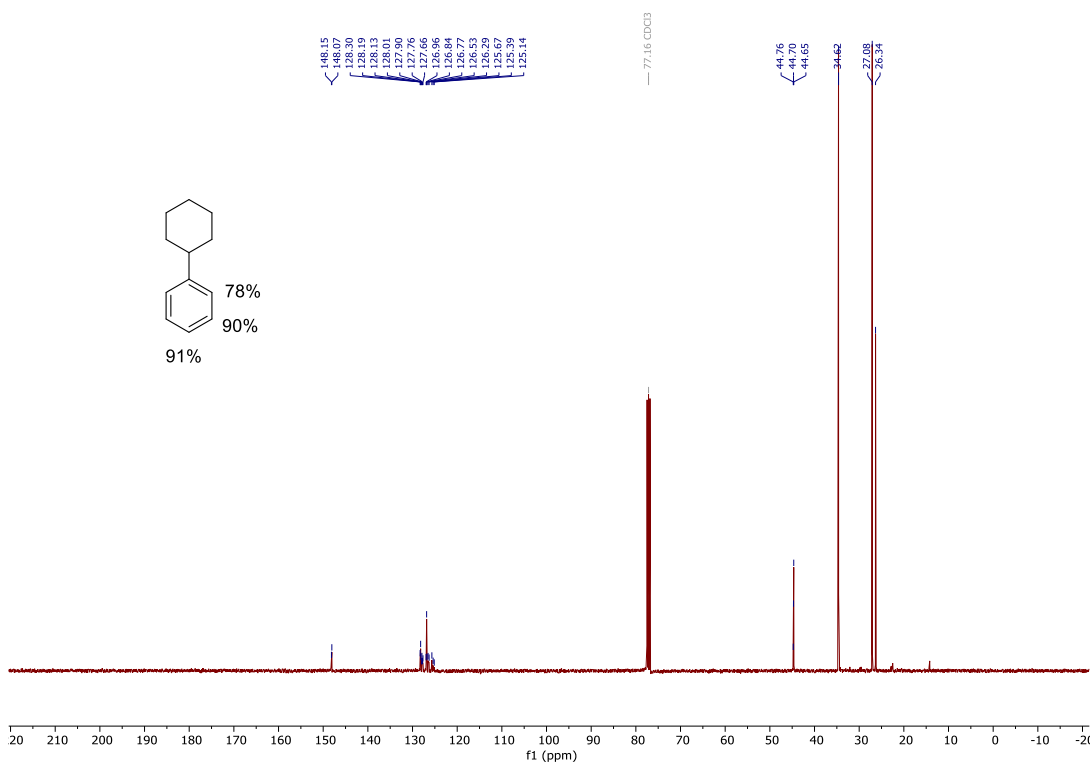

### Deuteration of (heptyloxy)benzene (3):

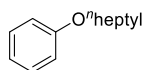

Following the general procedure E, using (heptyloxy)benzene (3) (38.5 mg, 0.200 mmol), and purification via silica gel column chromatography using pentane:Et<sub>2</sub>O = 50:1 as the eluent the target compound [D]3 was obtained as colorless liquid (32.8 mg, 83%). The degree of deuteration was determined by mass spectrometry.

**Deuterium Incorporation:** 4.76 D/molecule [Mass]; 4.73 D/molecule [<sup>1</sup>H-NMR].

#### NMR Data of Starting Material:

<sup>1</sup>H NMR (500 MHz, CDCl<sub>3</sub>) δ = 7.30-7.25 (m, 2H), 6.95-6.91 (m, 1H), 6.91-6.88 (m, 2H), 3.96 (t, *J* = 6.6 Hz, 2H), 1.83-1.74 (m, 2H), 1.49-1.42 (m, 2H), 1.40-1.27 (m, 6H), 0.93-0.86 (m, 3H) ppm.

<sup>13</sup>C NMR (125 MHz, CDCl<sub>3</sub>) δ = 159.3, 129.5, 120.6, 114.7, 68.0, 32.0, 29.5, 29.2, 26.2, 22.8, 14.2 ppm.

#### NMR Data of Product:

<sup>1</sup>H NMR (400 MHz, CDCl<sub>3</sub>) δ = 7.28 (s, 0.12H, 94% D), 6.93 (s, 0.05H, 95% D), 6.91 (s, 0.09H, 95% D), 3.96 (t, *J* = 6.6 Hz, 2H), 1.83-1.75 (m, 2H), 1.51-1.42 (m, 2H), 1.38-1.29 (m, 6H), 0.91 (t, *J* = 6.9 Hz, 3H) ppm.

<sup>13</sup>C NMR (100 MHz, CDCl<sub>3</sub>) δ = 159.2, 129.6-113.9 (5C), 68.0, 32.0, 29.5, 29.2, 26.2, 22.8, 14.2 ppm.

#### Mass Data:

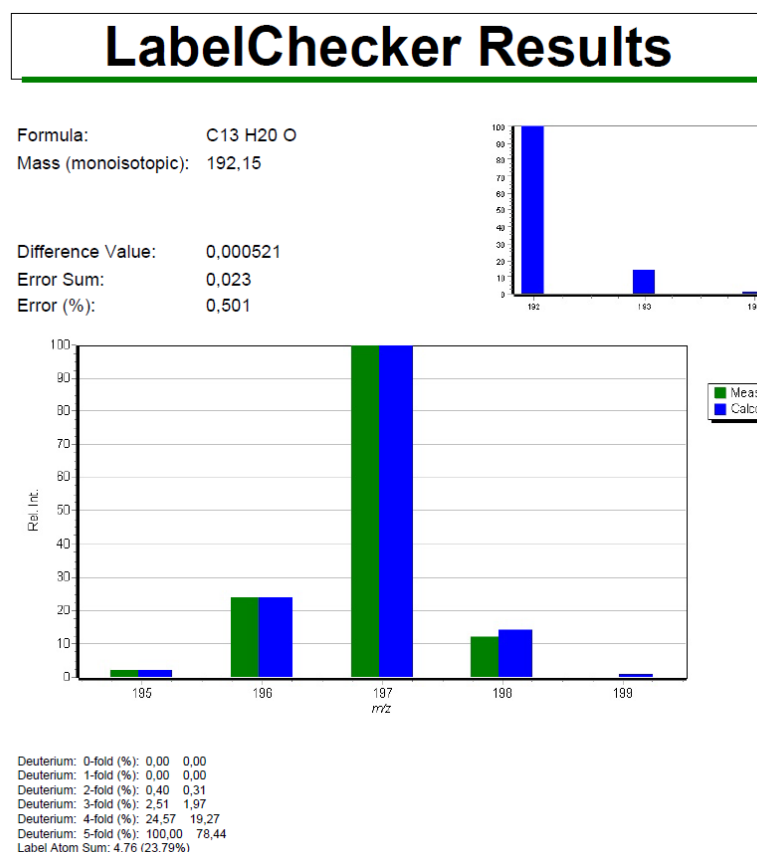





**<sup>13</sup>C-NMR spectrum in CDCl<sub>3</sub>:**

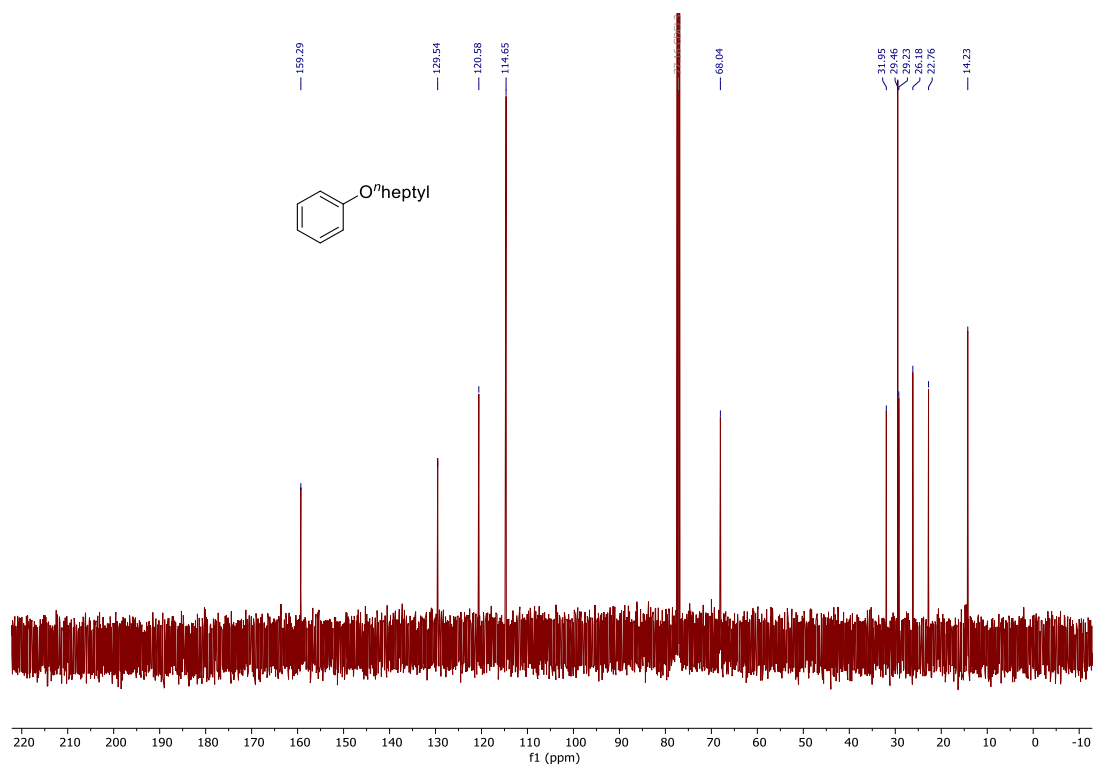

**<sup>13</sup>C-NMR spectrum in CDCl<sub>3</sub>:**

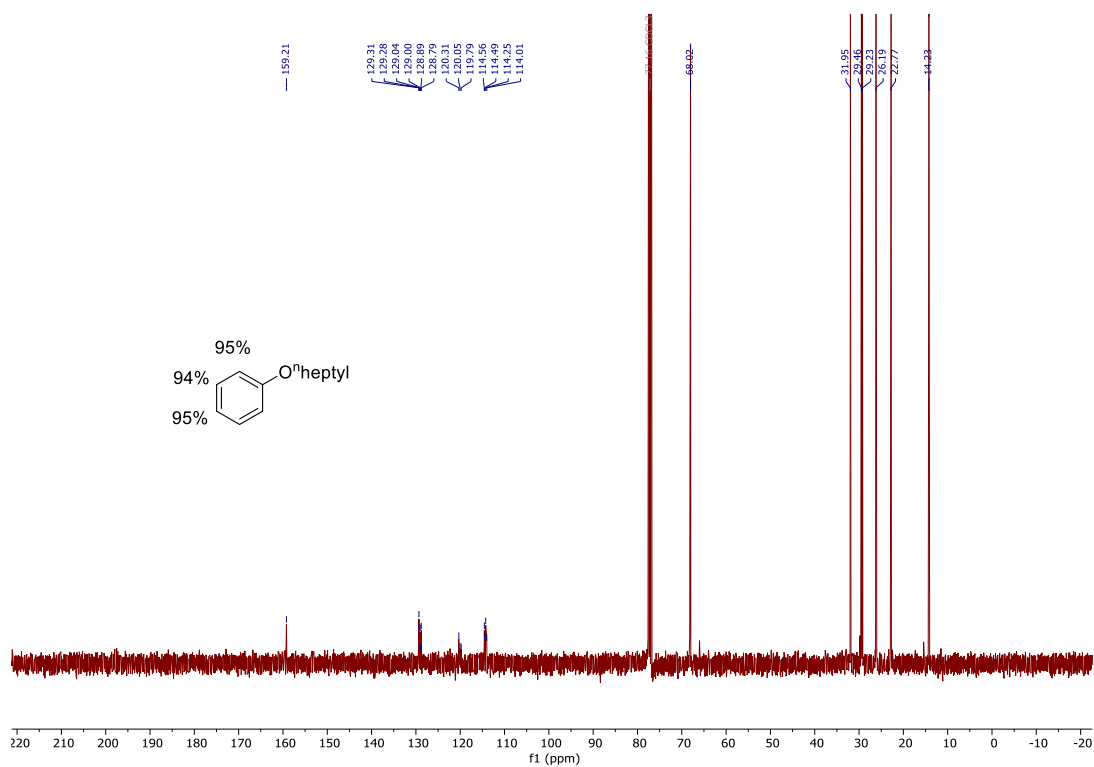

## Deuteration of 2-methyl-1-phenylpropan-1-one (4):

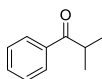

Following the general procedure F and using 2-methyl-1-phenylpropan-1-one (4) (29.6 mg, 0.200 mmol), and purification via silica gel column chromatography using pentane:Et<sub>2</sub>O = 50:1 as the eluent, the target compound [D]4 was obtained as light-yellow liquid (22.5 mg, 74%). The degree of deuteration was determined by mass spectrometry.

**Deuterium Incorporation:** 4.30 D/molecule [Mass]; 4.42 D/molecule [<sup>1</sup>H-NMR].

### NMR Data of Starting Material:

<sup>1</sup>H NMR (400 MHz, CDCl<sub>3</sub>) δ = 8.00-7.92 (m, 2H), 7.59-7.52 (m, 1H), 7.50-7.42 (m, 2H), 3.56 (hept, *J* = 6.8 Hz, 1H), 1.22 (d, *J* = 6.8 Hz, 6H) ppm.

<sup>13</sup>C NMR (101 MHz, CDCl<sub>3</sub>) δ = 204.6, 136.4, 132.9, 128.7, 128.5, 35.5, 19.3 ppm.

### NMR Data of Product:

<sup>1</sup>H NMR (400 MHz, CDCl<sub>3</sub>) δ = 7.96 (s, 0.54H, 73% D), 7.55 (s, 0.06H, 94% D), 7.49-7.44 (m, 0.11H, 94.5% D), 3.63-3.49 (m, 0.87H, 13% D), 1.22 (d, *J* = 6.8 Hz, 6H) ppm.

<sup>13</sup>C NMR (101 MHz, CDCl<sub>3</sub>) δ = 204.7, 136.7-135.2 (1C), 133.5-130.7 (1C), 129.4-126.9 (4C), 36.8-33.2 (1C), 22.4-13.2 (2C) ppm.

### Mass Data:

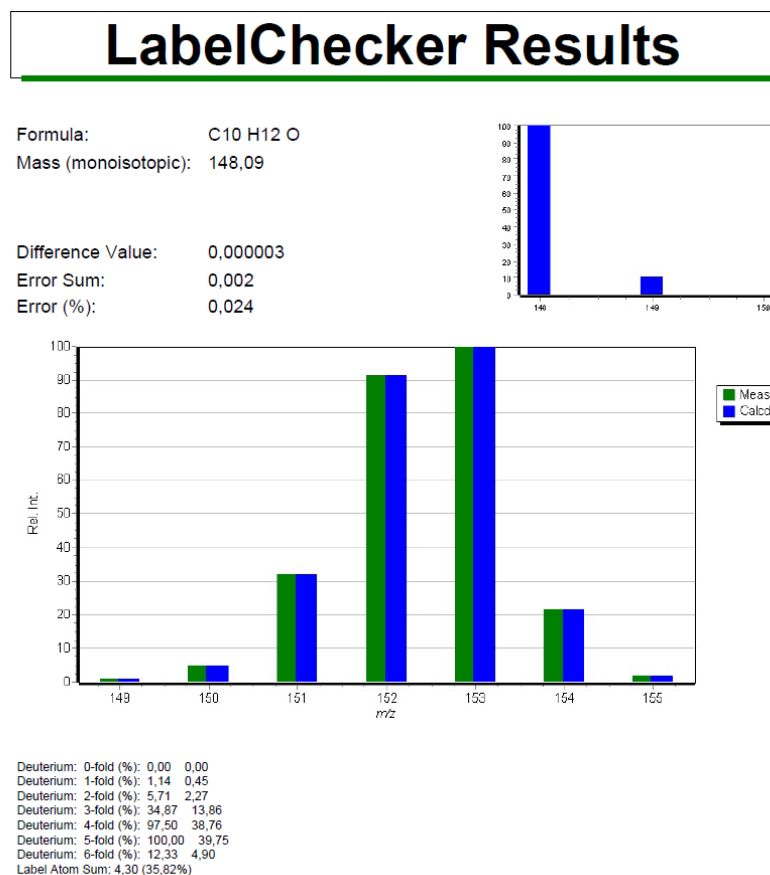

### <sup>1</sup>H-NMR spectrum in CDCl<sub>3</sub>:

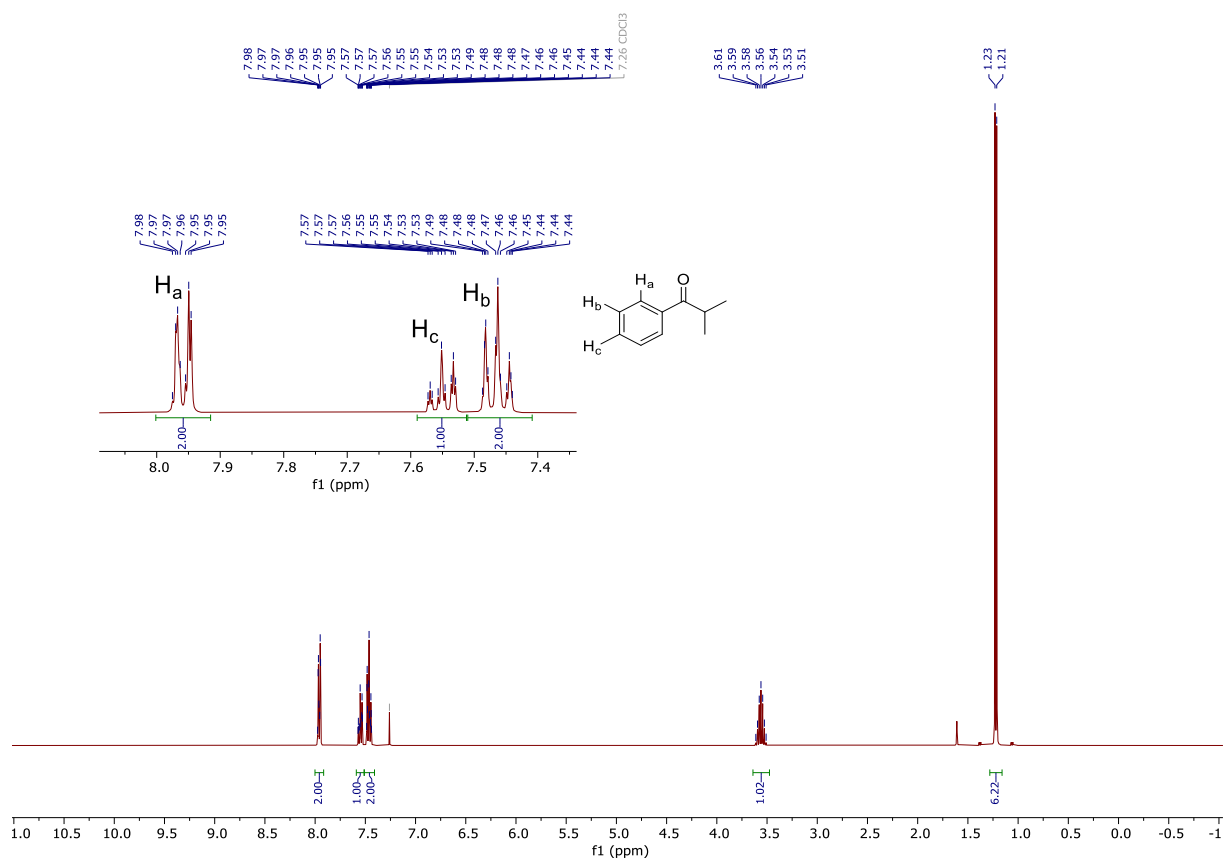

### <sup>1</sup>H-NMR spectrum in CDCl<sub>3</sub>:

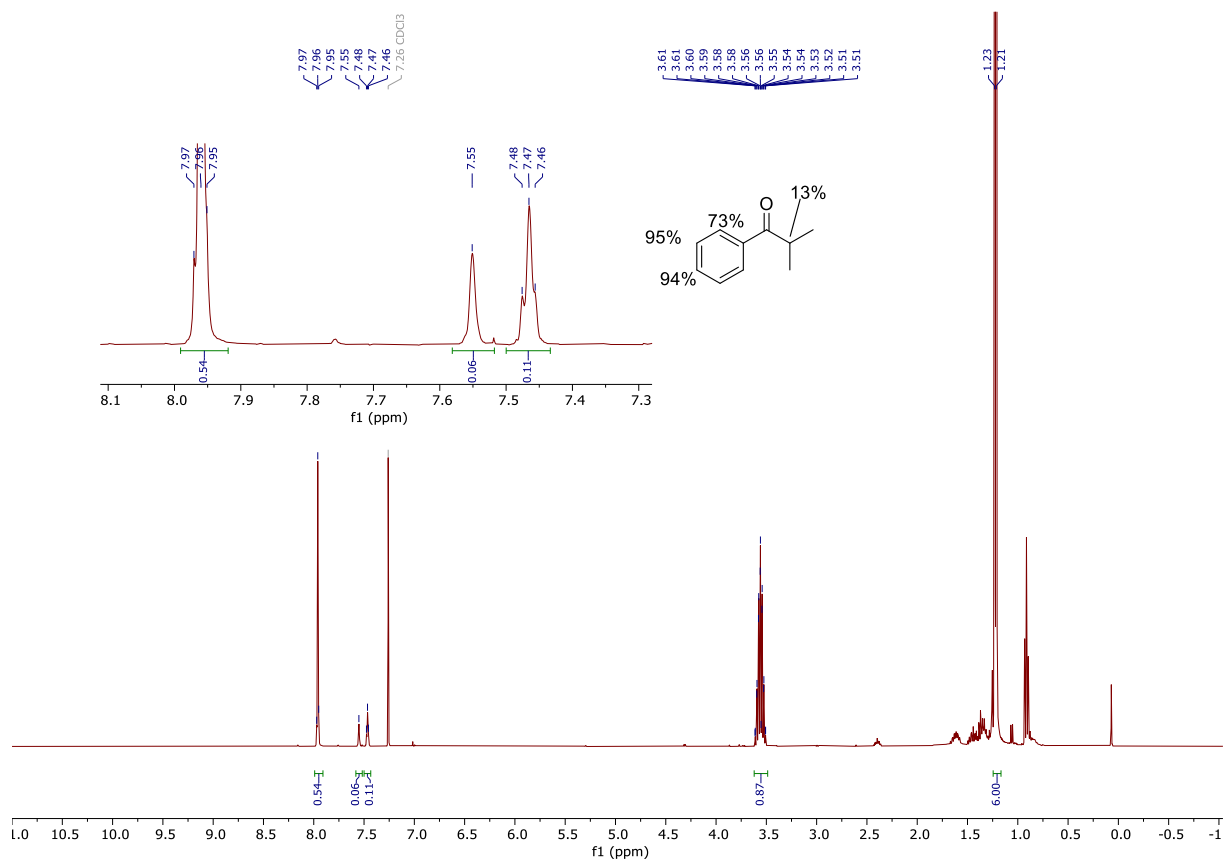

### <sup>13</sup>C-NMR spectrum in CDCl<sub>3</sub>:

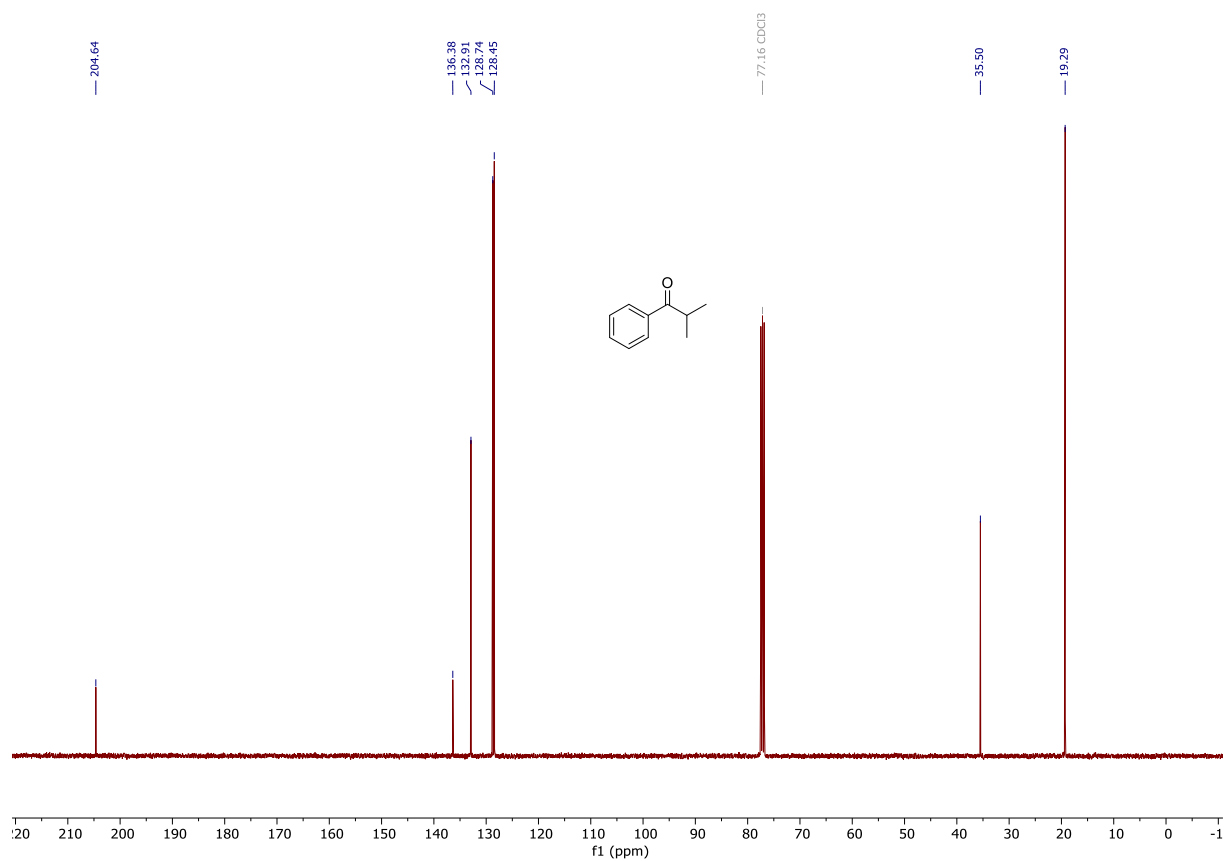

### <sup>13</sup>C-NMR spectrum in CDCl<sub>3</sub>:

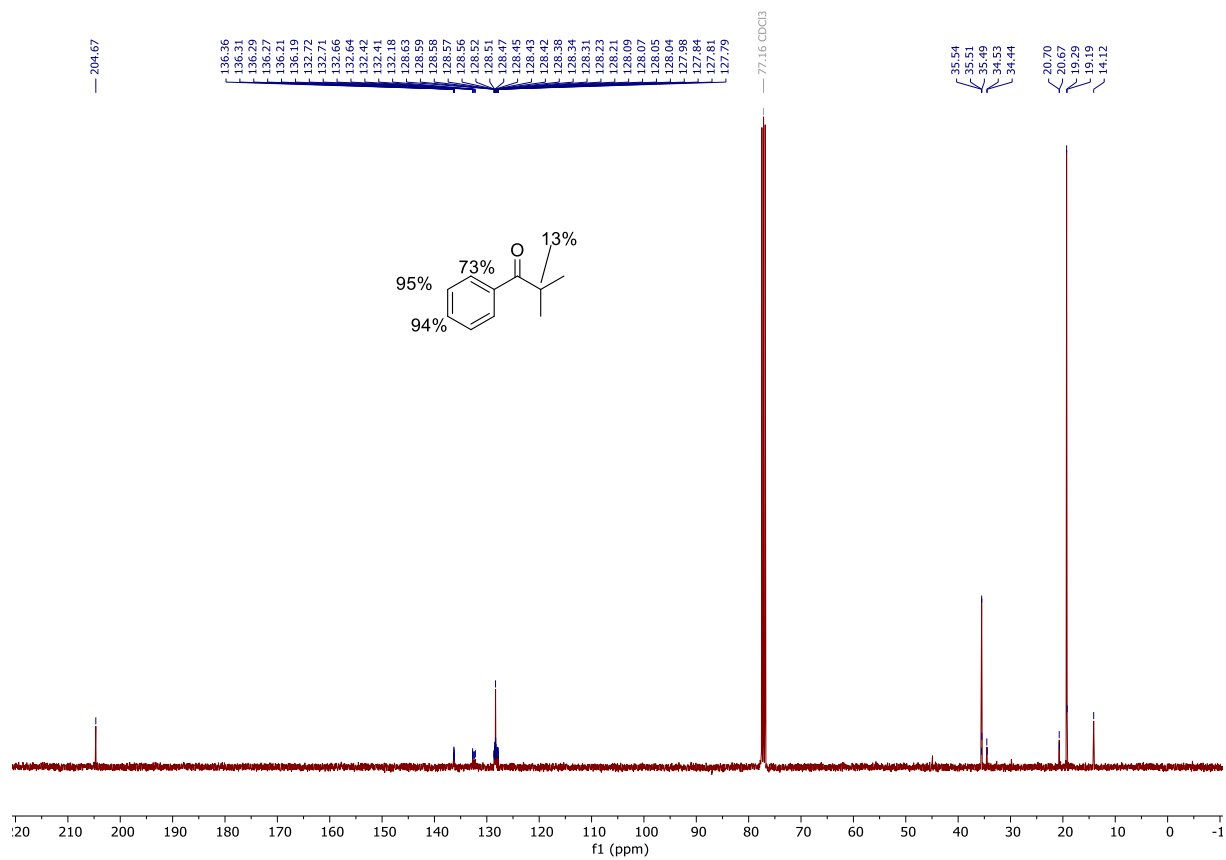

## Deuteration of 1,1,1,3,3,3-hexafluoropropan-2-yl benzoate (**1**):

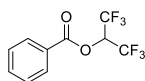

Following the general procedure F and using 1,1,1,3,3,3-hexafluoropropan-2-yl benzoate (**1**) (54.4 mg, 0.200 mmol), and purification via silica gel column chromatography using pentane:Et<sub>2</sub>O = 50:1 as the eluent, the target compound [**D**]**1** was obtained as colorless solid (41.9 mg, 76%). The degree of deuteration was determined by mass spectrometry.

**Deuterium Incorporation:** 4.03 D/molecule [Mass]; 4.13 D/molecule [<sup>1</sup>H-NMR].

### NMR Data of Starting Material:

<sup>1</sup>H NMR (400 MHz, CDCl<sub>3</sub>) δ = 8.17-8.08 (m, 2H), 7.72-7.65 (m, 1H), 7.57-7.48 (m, 2H), 6.02 (hept, *J* = 6.1 Hz, 1H) ppm.

<sup>13</sup>C NMR (101 MHz, CDCl<sub>3</sub>) δ = 163.4, 134.9, 130.7, 129.0, 127.0, 120.7 (q, *J* = 282.3 Hz), 67.1 (hept, *J* = 34.8 Hz) ppm.

<sup>19</sup>F NMR (286 MHz, CDCl<sub>3</sub>) δ = -73.2 ppm.

### NMR Data of Product:

<sup>1</sup>H NMR (400 MHz, CDCl<sub>3</sub>) δ = 8.16-8.08 (m, 0.72H, 64% D), 7.68 (s, 0.07H, 93% D), 7.56-7.49 (m, 0.12H, 94% D), 6.03 (hept, *J* = 6.1 Hz, 1H) ppm.

<sup>13</sup>C NMR (100 MHz, CDCl<sub>3</sub>) δ = 163.4, 135.4-133.6 (1C), 131.0-129.5 (2C), 129.3-127.8 (2C), 126.9, 120.7 (q, *J* = 282.3 Hz), 67.1 (hept, *J* = 34.8 Hz) ppm.

<sup>19</sup>F NMR (377 MHz, CDCl<sub>3</sub>) δ = -73.2 ppm.

### Mass Data:

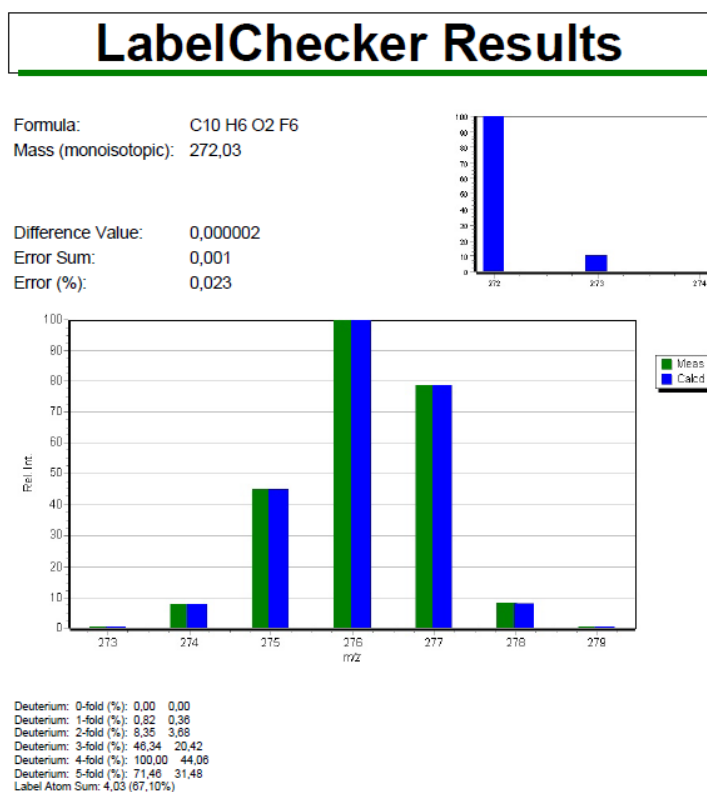

# <sup>1</sup>H-NMR spectrum in CDCl<sub>3</sub>:

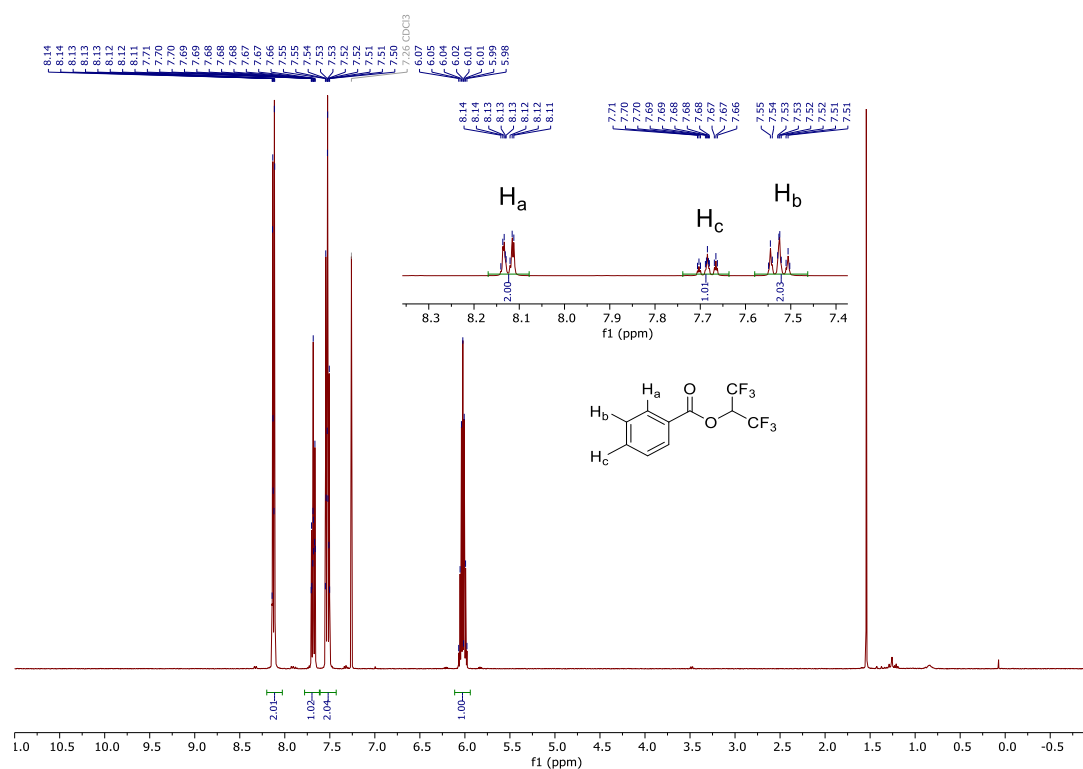

# <sup>1</sup>H-NMR spectrum in CDCl<sub>3</sub>:

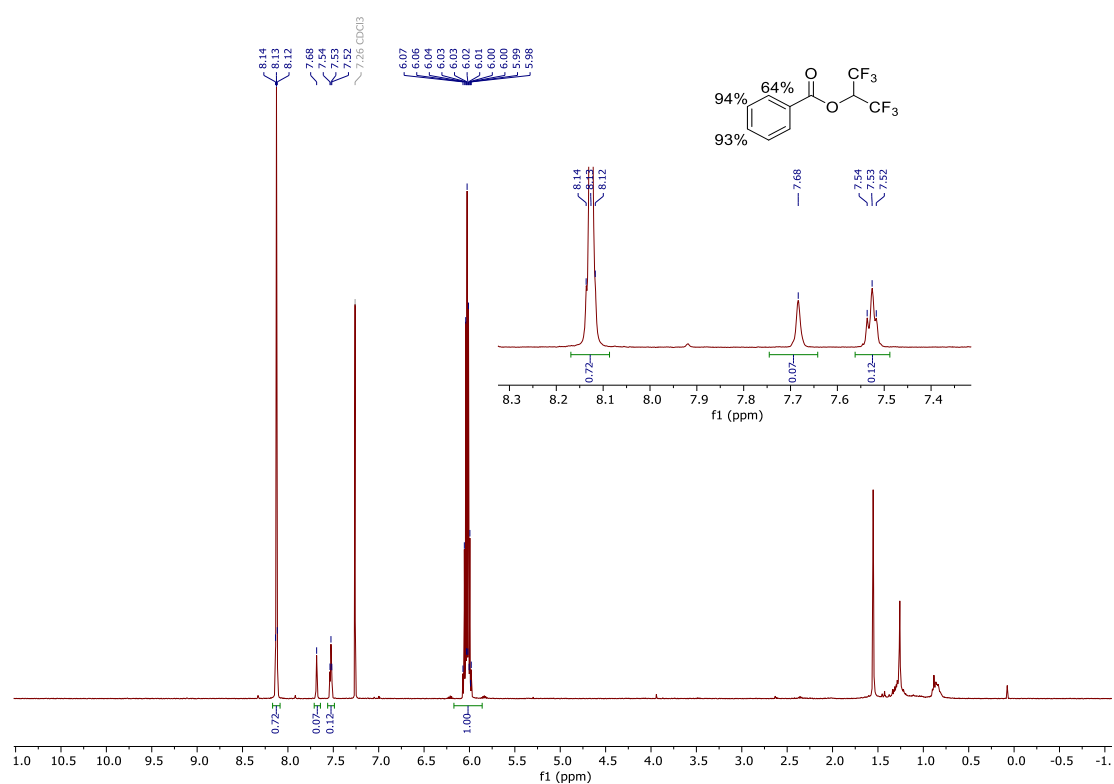

**<sup>13</sup>C-NMR spectrum in CDCl<sub>3</sub>:**

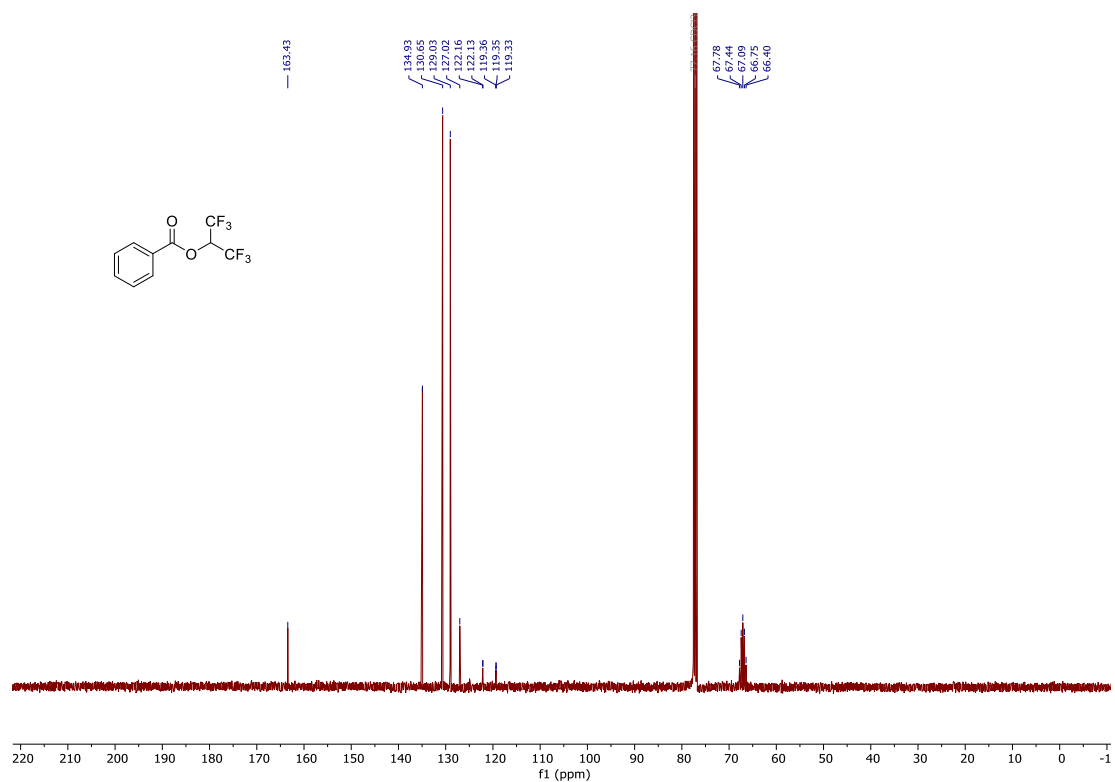

**<sup>13</sup>C-NMR spectrum in CDCl<sub>3</sub>:**

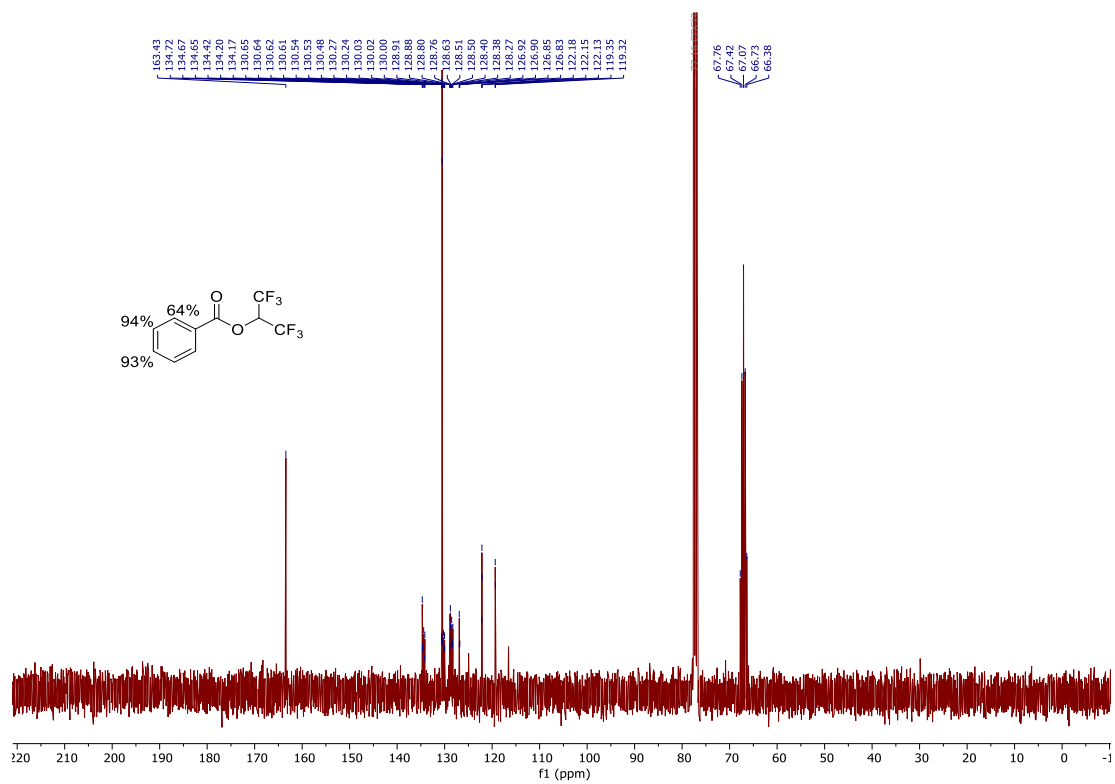

**<sup>19</sup>F-NMR spectrum in CDCl<sub>3</sub>:**

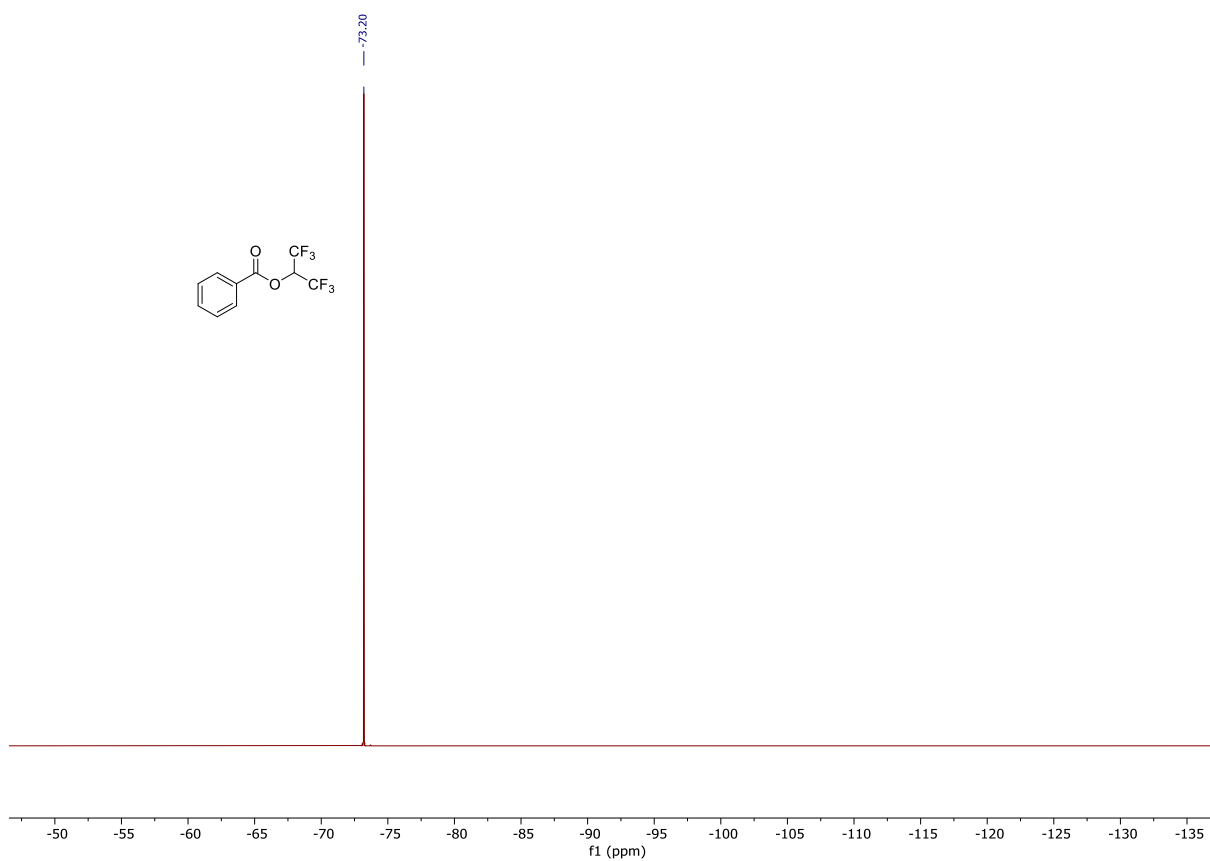

**<sup>19</sup>F-NMR spectrum in CDCl<sub>3</sub>:**

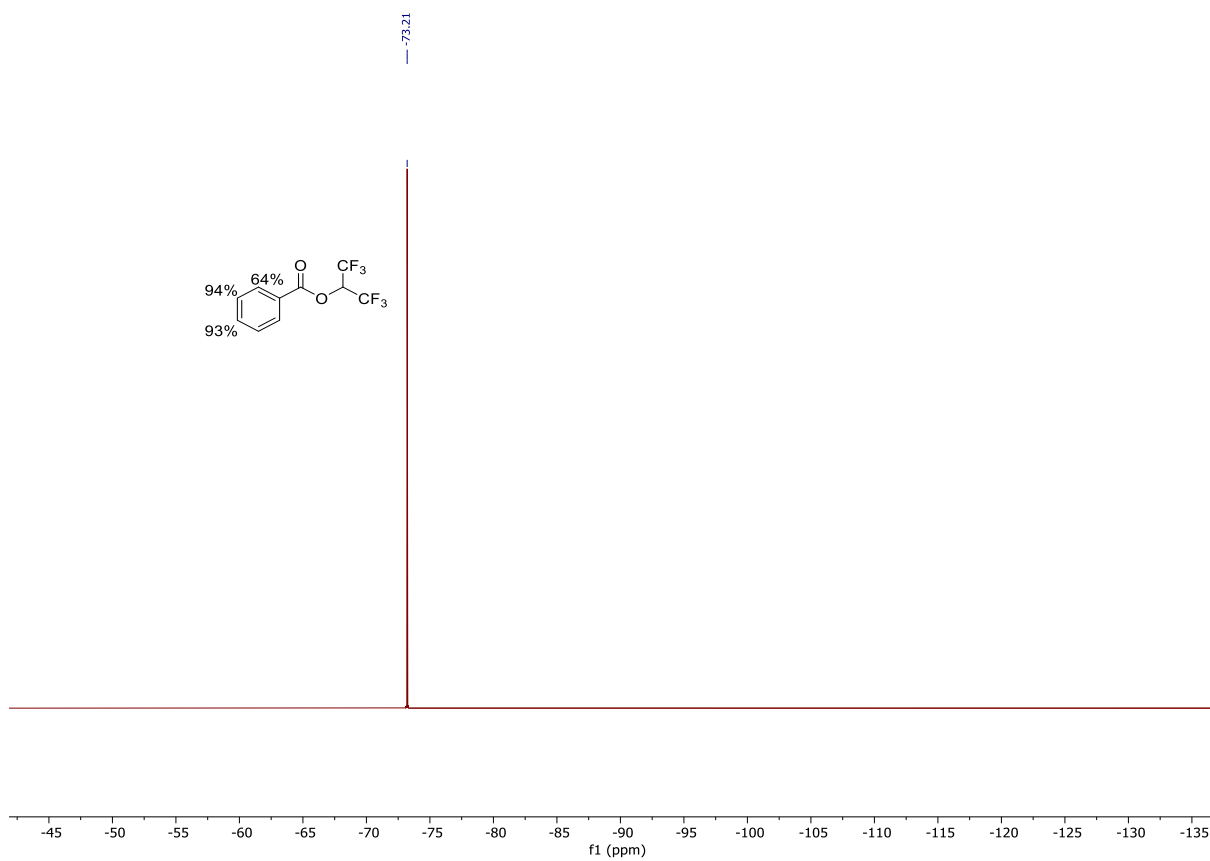



## Deuteration of methyl cinnamate (5):

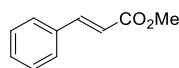

Following the general procedure F and using methyl cinnamate (5) (32.4 mg, 0.200 mmol) and purification by silica gel column chromatography using Pentane: Et<sub>2</sub>O = 90:10 as the eluent, the target compound [D]5 was obtained as colorless liquid (22.0 mg, 66%). The degree of deuteration was determined by HRMS studies.

**Deuterium Incorporation:** 4.52 D/molecule [HRMS]; 4.54 D/molecule [<sup>1</sup>H-NMR].

### NMR Data of Starting Material:

<sup>1</sup>H NMR (600 MHz, C<sub>6</sub>D<sub>6</sub>) δ = 7.78 (d, *J* = 16.1 Hz, 1H), 7.10-7.06 (m, 2H), 7.01-6.93 (m, 3H), 6.42 (d, *J* = 16.0 Hz, 1H), 3.48 (s, 3H).

<sup>13</sup>C NMR (150 MHz, C<sub>6</sub>D<sub>6</sub>) δ = 166.9, 144.8, 134.8, 130.1, 129.0, 128.3, 118.5, 51.2 ppm.

### NMR Data of Product:

<sup>1</sup>H NMR (400 MHz, C<sub>6</sub>D<sub>6</sub>) δ = 7.83-7.73 (m, 0.97H, 3% D), 7.10-7.04 (m, 0.61H, 70% D), 7.00-6.91 (m, 0.69H, 77% average D), 6.42 (d, 0.19H, 81% D), 3.48 (s, 3H) ppm.

<sup>13</sup>C NMR (100 MHz, C<sub>6</sub>D<sub>6</sub>) δ = 166.9, 144.8-144.7(1C), 134.8-134.5 (1C), 130.0-129.7 (1C), 129.4-129.2 (2C), 128.9-128.7 (2C), 118.5-118.4(1C), 51.2 ppm.

### Mass Data:

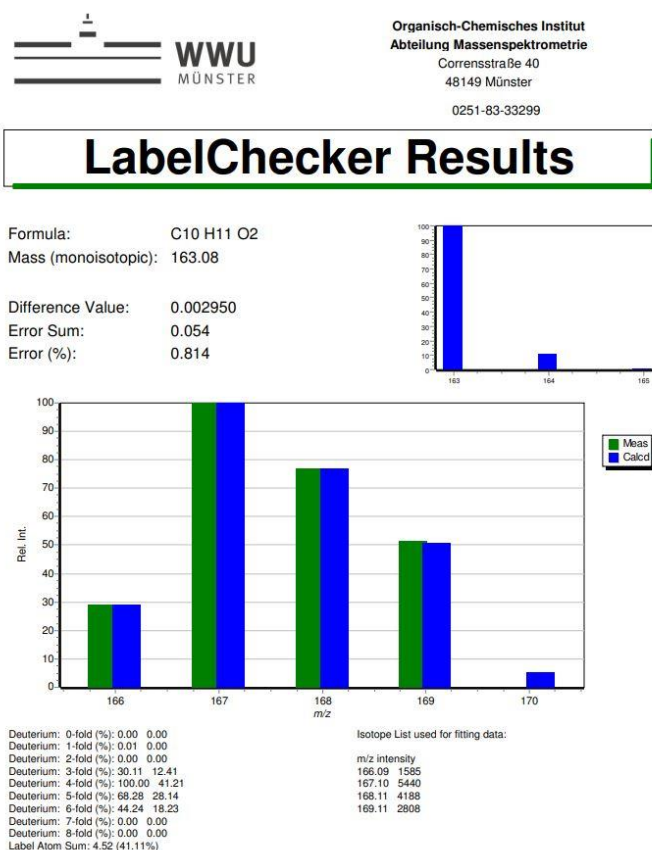

# <sup>1</sup>H-NMR spectrum in C<sub>6</sub>D<sub>6</sub>:

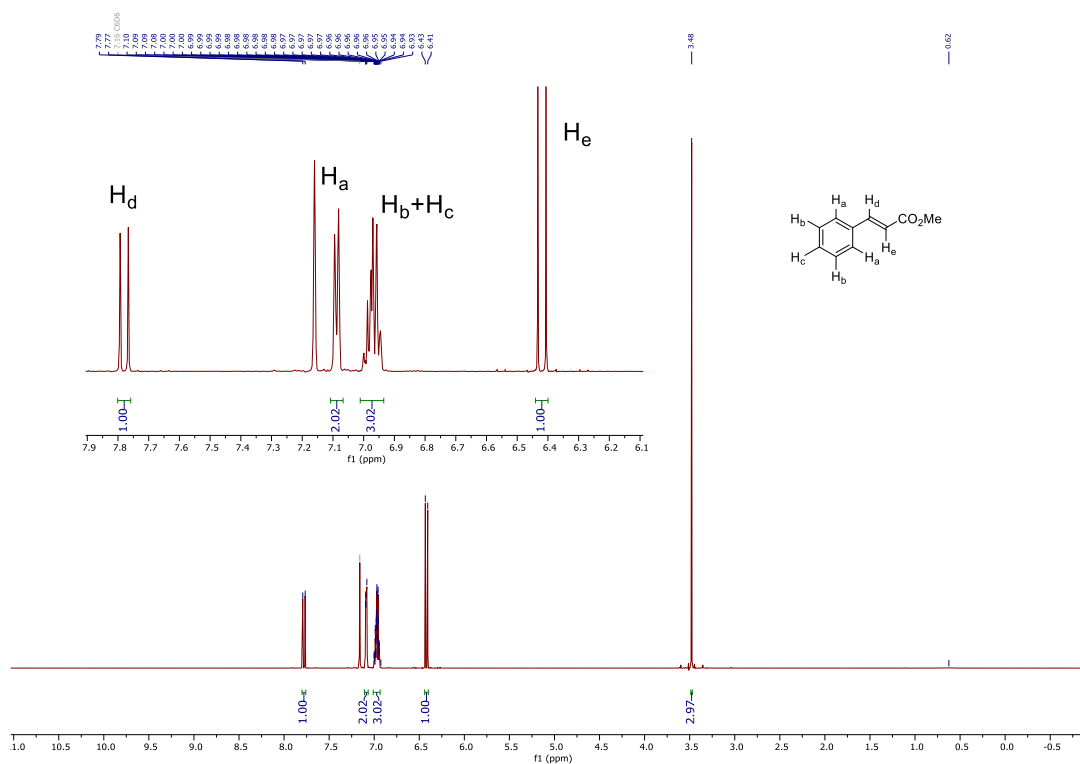

# <sup>1</sup>H-NMR spectrum in C<sub>6</sub>D<sub>6</sub>:

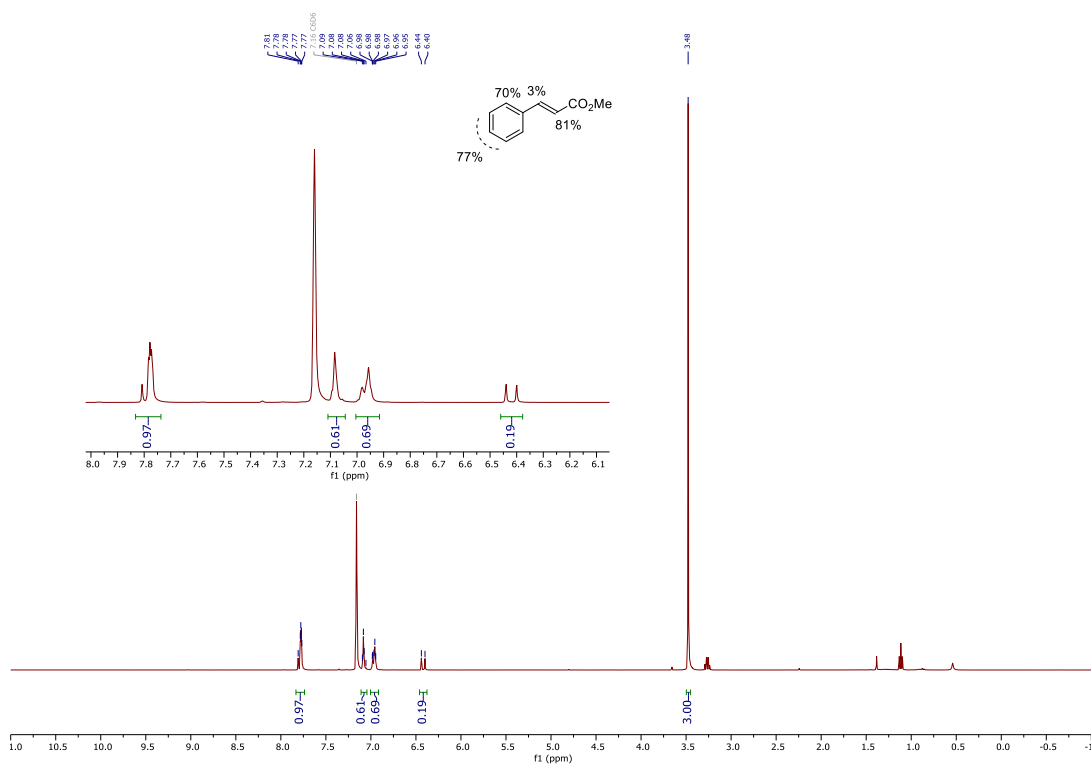



## Deuteration of isobutyl 2,2-difluoro-2-phenylacetate (**6**):

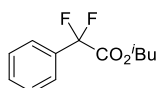

Following the general procedure F and using isobutyl 2,2-difluoro-2-phenylacetate (**6**) (45.6 mg, 0.200 mmol), and purification via silica gel column chromatography using pentane:Et<sub>2</sub>O = 50:1 as the eluent, the target compound [**D**]6 was obtained as light-yellow liquid (25.1 mg, 54%). The degree of deuteration was determined by mass spectrometry.

**Deuterium Incorporation:** 3.09 D/molecule [Mass]; 3.23 D/molecule [<sup>1</sup>H-NMR].

### NMR Data of Starting Material:

<sup>1</sup>H NMR (400 MHz, CDCl<sub>3</sub>) δ = 7.66-7.58 (m, 2H), 7.54-7.46 (m, 1H), 7.46-7.40 (m, 2H), 4.02 (d, *J* = 6.6 Hz, 2H), 1.96 (dh, *J* = 13.4, 6.7 Hz, 1H), 0.88 (d, *J* = 6.8 Hz, 6H) ppm.

<sup>13</sup>C NMR (101 MHz, CDCl<sub>3</sub>) δ = 164.4 (t, *J* = 35.4 Hz), 133.1 (t, 25.5 Hz), 131.1 (t, *J* = 1.8 Hz), 128.8, 125.6 (t, *J* = 6.2 Hz), 113.6 (t, *J* = 252.0 Hz), 72.8, 27.8, 18.9 ppm.

<sup>19</sup>F NMR (377 MHz, CDCl<sub>3</sub>) δ = -104.1 ppm.

### NMR Data of Product:

<sup>1</sup>H NMR (400 MHz, CDCl<sub>3</sub>) δ = 7.62 (s, 1.59H, 20.5% D), 7.49 (s, 0.07H, 93% D), 7.46-7.39 (m, 0.12H, 94% D), 4.02 (d, *J* = 6.6 Hz, 2H), 1.96 (dh, *J* = 13.4, 6.7 Hz, 1H), 0.88 (d, *J* = 6.8 Hz, 6H) ppm.

<sup>13</sup>C NMR (101 MHz, CDCl<sub>3</sub>) δ = 164.4 (t, *J* = 35.4 Hz), 134.4-127.2 (5C), 125.5 (t, *J* = 6.1 Hz), 113.6 (t, *J* = 252.0 Hz), 72.8, 27.8, 18.9 ppm.

<sup>19</sup>F NMR (377 MHz, CDCl<sub>3</sub>) δ = -104.1 ppm.

### Mass Data:

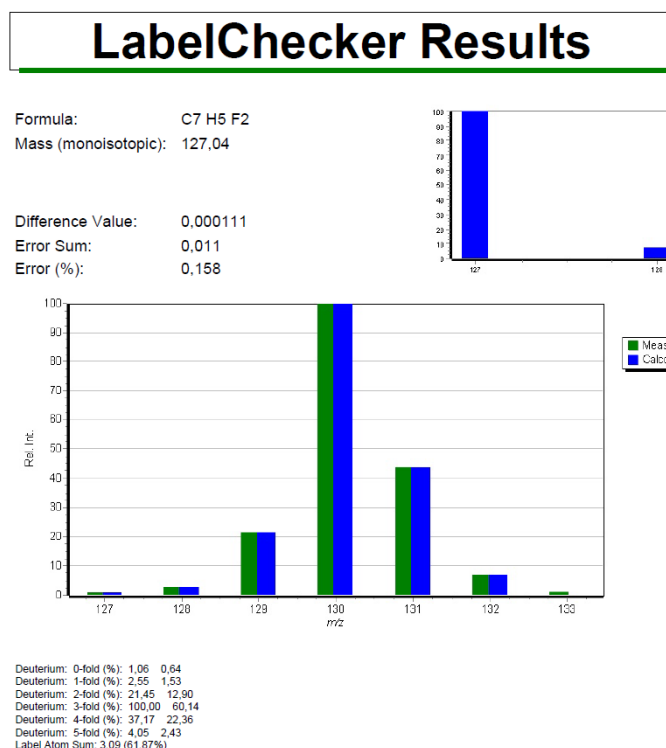

### <sup>1</sup>H-NMR spectrum in CDCl<sub>3</sub>:

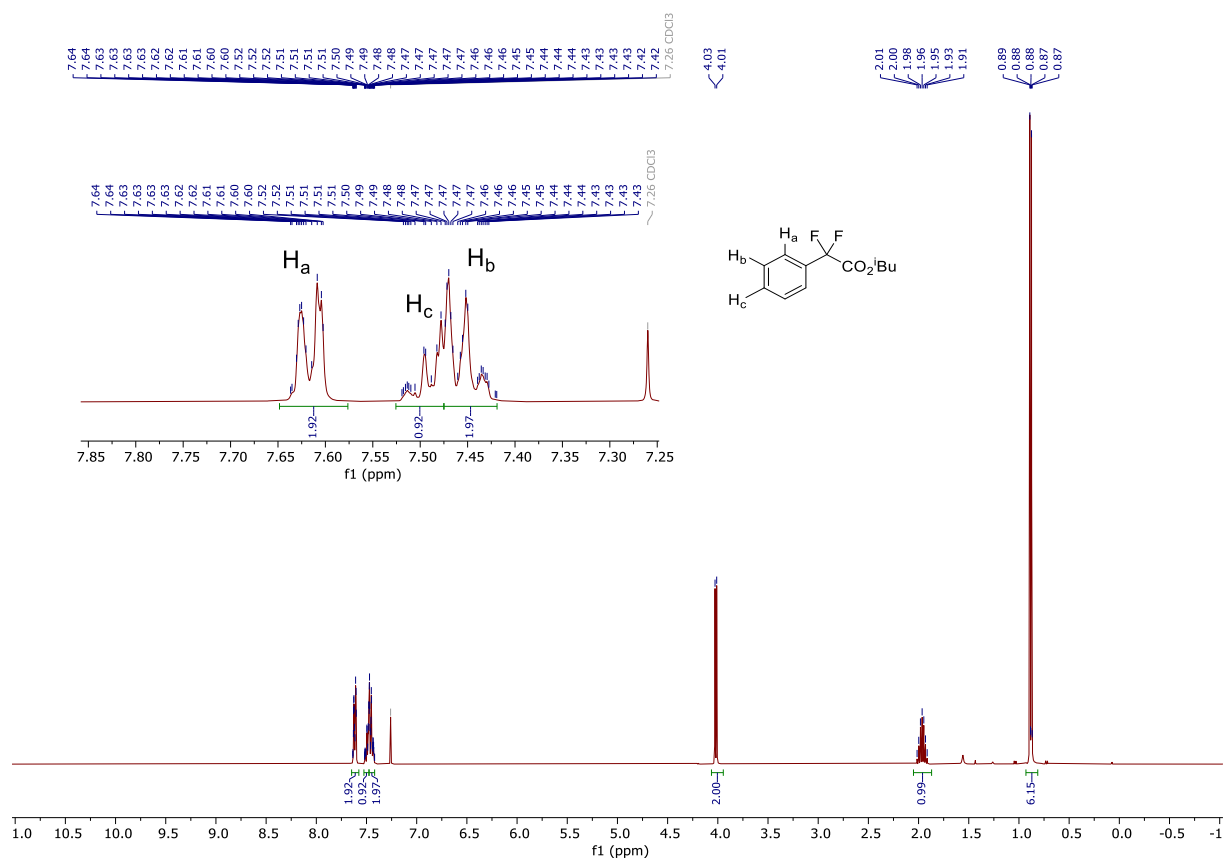

### <sup>1</sup>H-NMR spectrum in CDCl<sub>3</sub>:

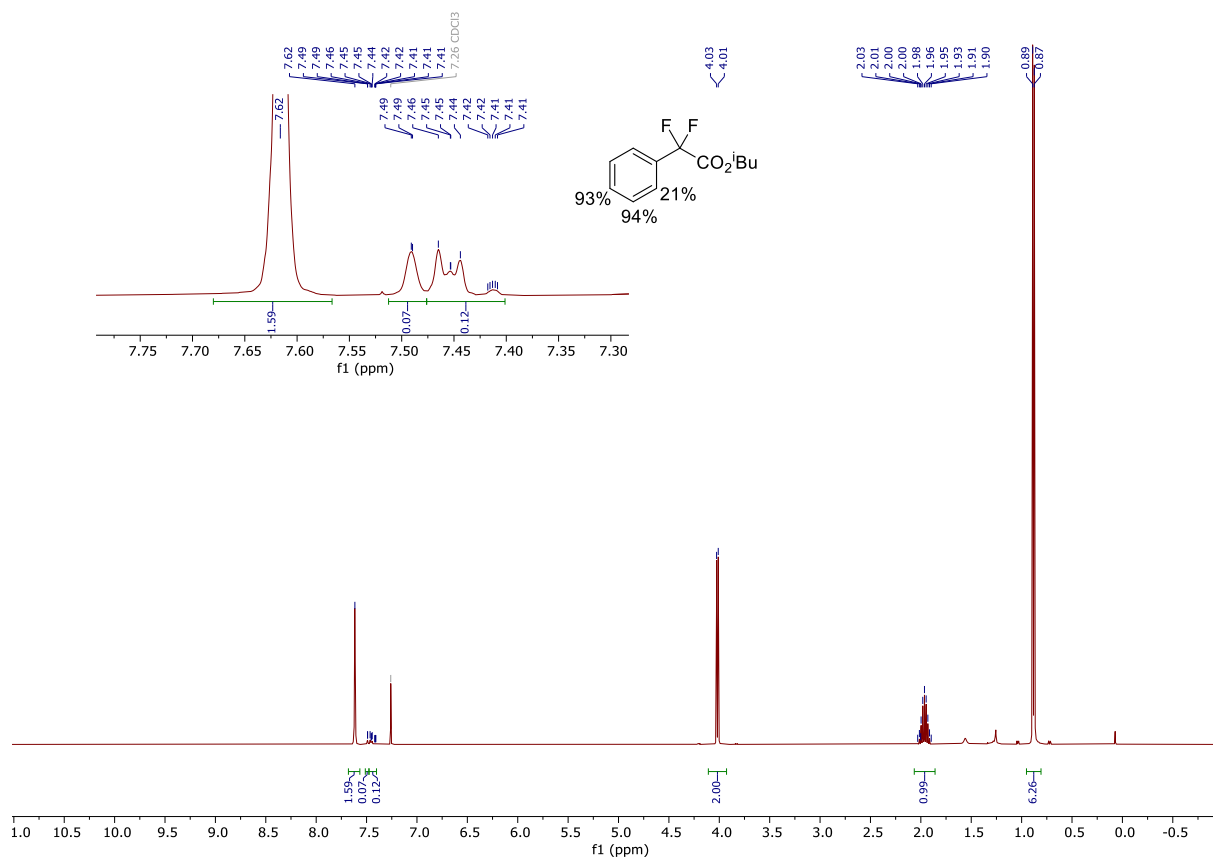

### <sup>13</sup>C-NMR spectrum in CDCl<sub>3</sub>:

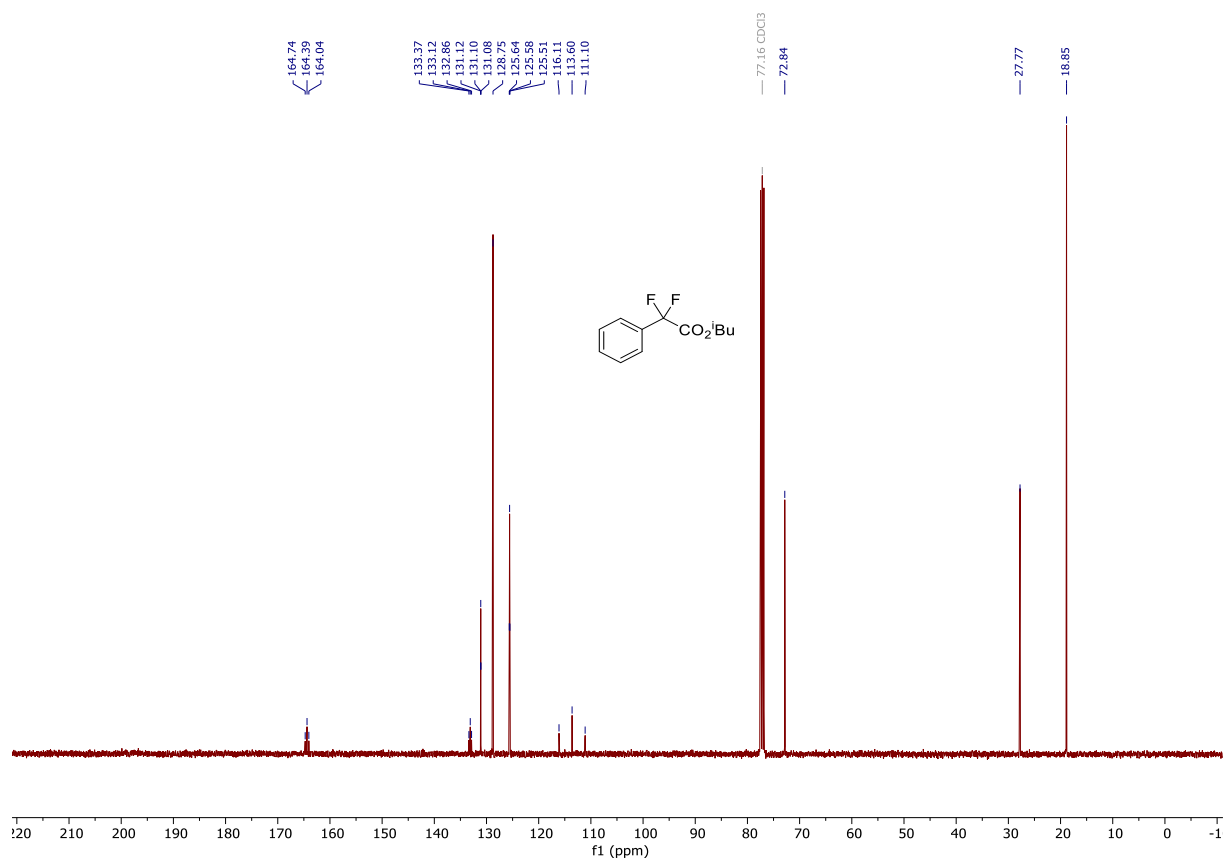

### <sup>13</sup>C-NMR spectrum in CDCl<sub>3</sub>:

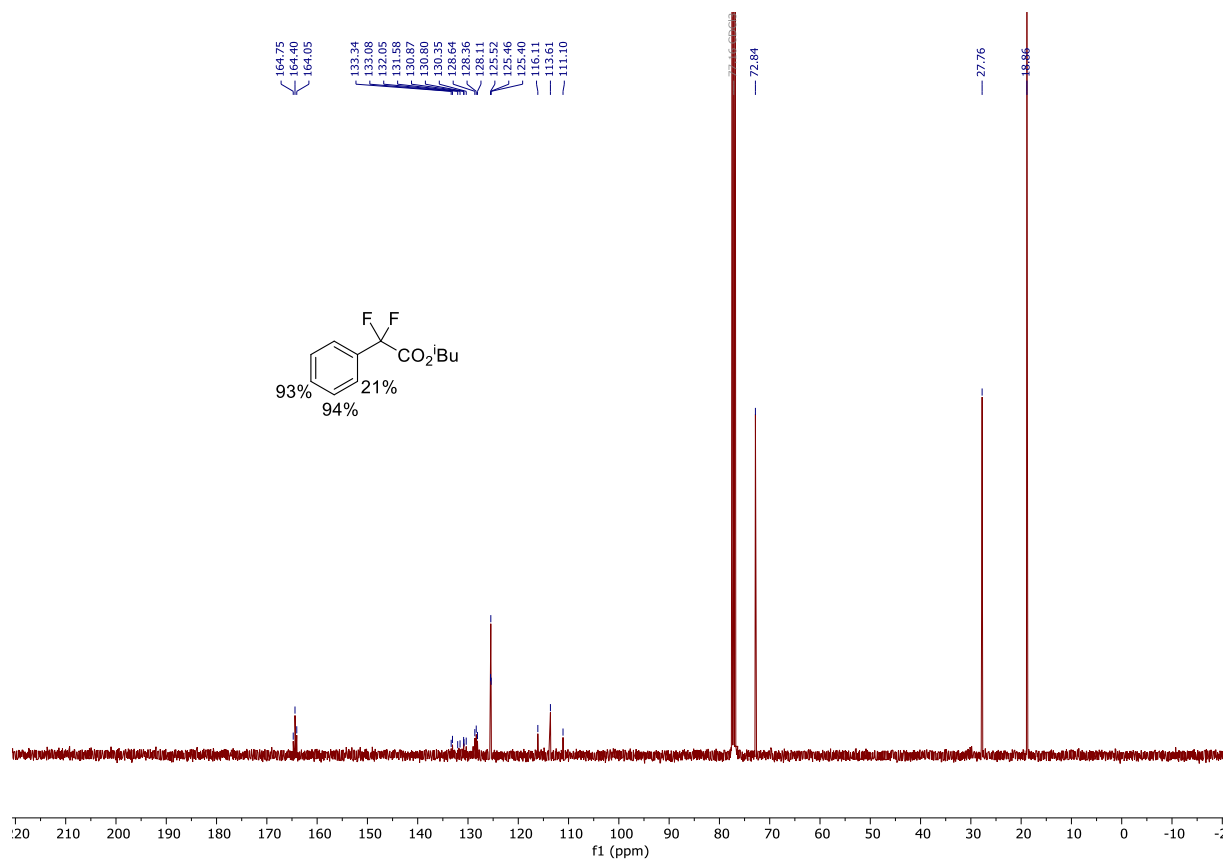

**<sup>19</sup>F-NMR spectrum in CDCl<sub>3</sub>:**

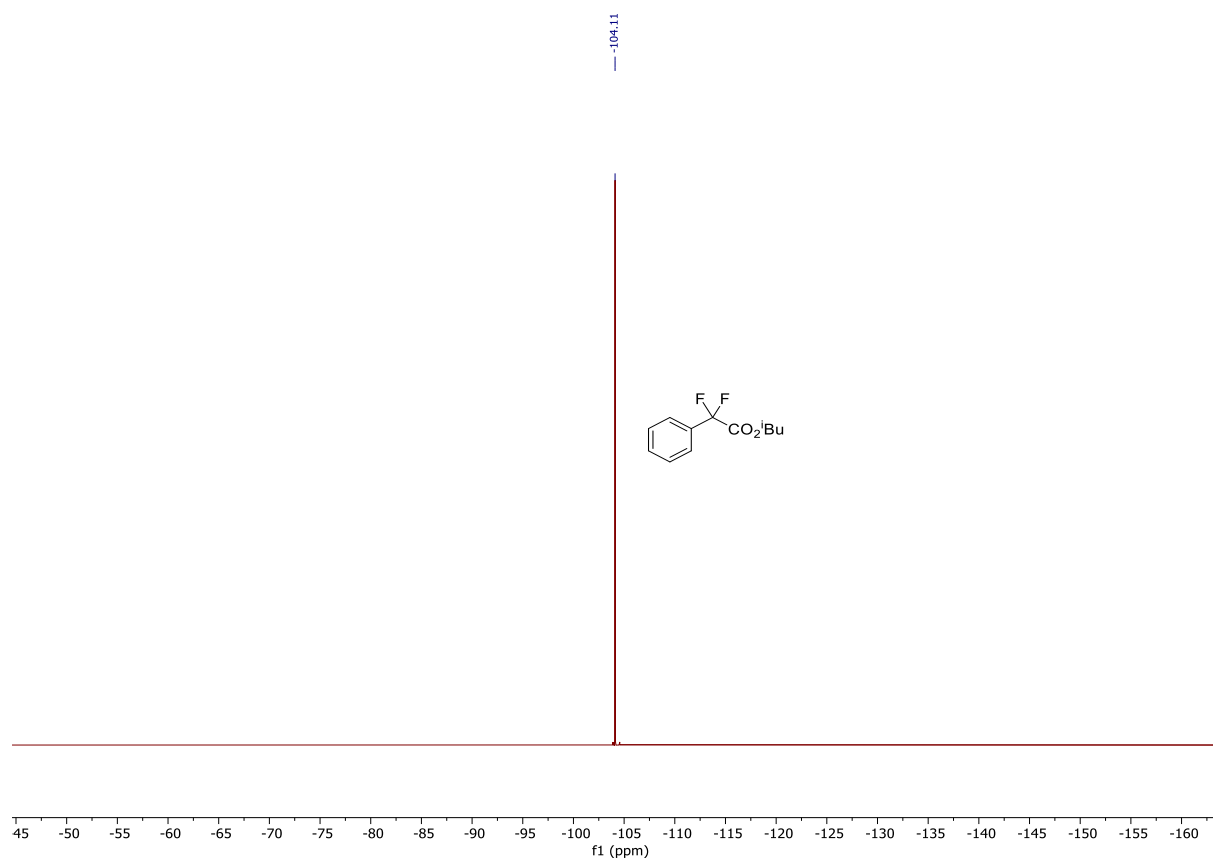

**<sup>19</sup>F-NMR spectrum in CDCl<sub>3</sub>:**

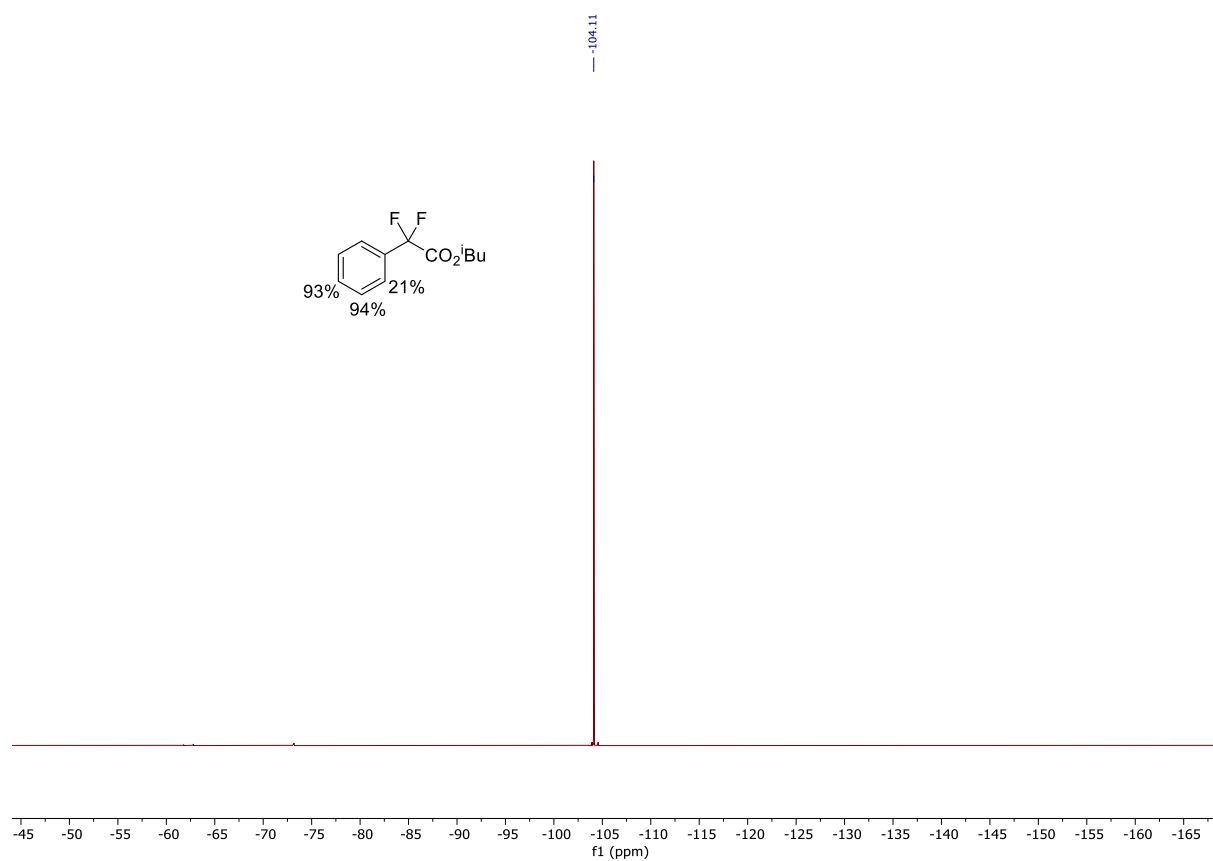

## Deuteration of 1,2,3,4-tetrahydronaphthalene (7):

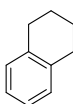

Following the general procedure E, but at 40 °C for 72 h, using 1,2,3,4-tetrahydronaphthalene (7) (26.4 mg, 0.200 mmol), and purification via silica gel column chromatography using pentane as the eluent, the target compound [D]7 was obtained as colorless liquid (16.3 mg, 60%). The degree of deuteration was determined by mass spectrometry.

**Deuterium Incorporation:** 3.40 D/molecule [Mass]; 3.77 D/molecule [<sup>1</sup>H-NMR].

### NMR Data of Starting Material:

<sup>1</sup>H NMR (600 MHz, CDCl<sub>3</sub>) δ = 7.23-7.15 (m, 4H), 2.93-2.85 (m, 4H), 1.96-1.88 (m, 4H) ppm.

<sup>13</sup>C NMR (150 MHz, CDCl<sub>3</sub>) δ = 137.2, 129.2, 125.5, 29.5, 23.4 ppm.

### NMR Data of Product:

<sup>1</sup>H NMR (400 MHz, CDCl<sub>3</sub>) δ = 7.09 (s, 0.10H, 95% D), 7.07 (s, 0.13H, 93% D), 2.85-2.71 (m, 4H), 1.88-1.73 (m, 4H). ppm.

<sup>13</sup>C NMR (100 MHz, CDCl<sub>3</sub>) δ = 137.2, 129.4-128.3 (2C), 125.7-124.4 (2C), 29.5, 23.4 ppm.

### Mass Data:

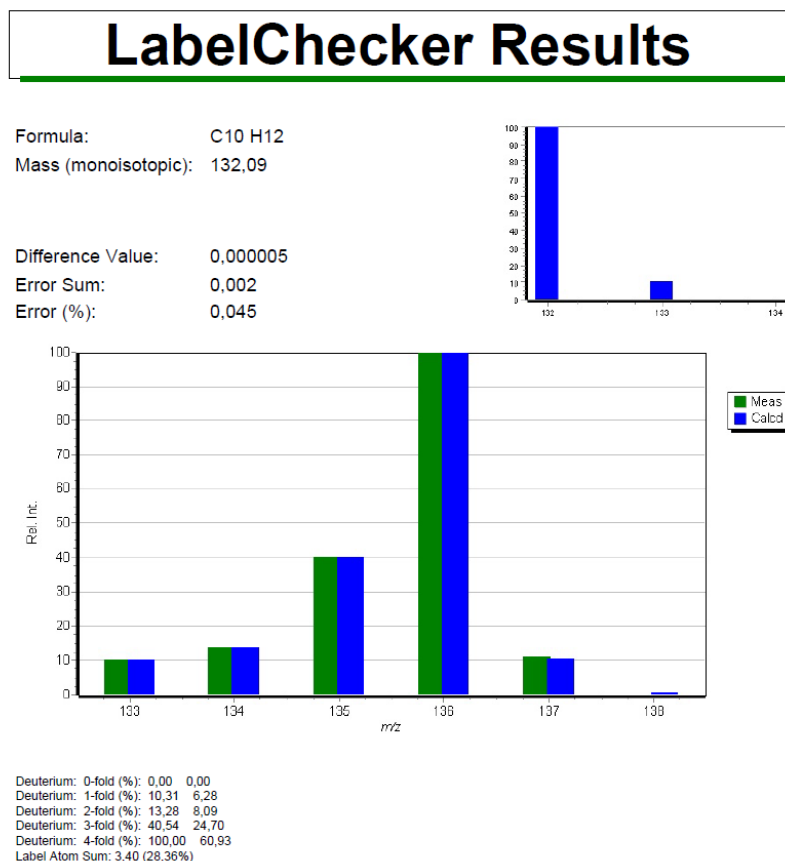



# <sup>1</sup>H-NMR spectrum in CDCl<sub>3</sub>:

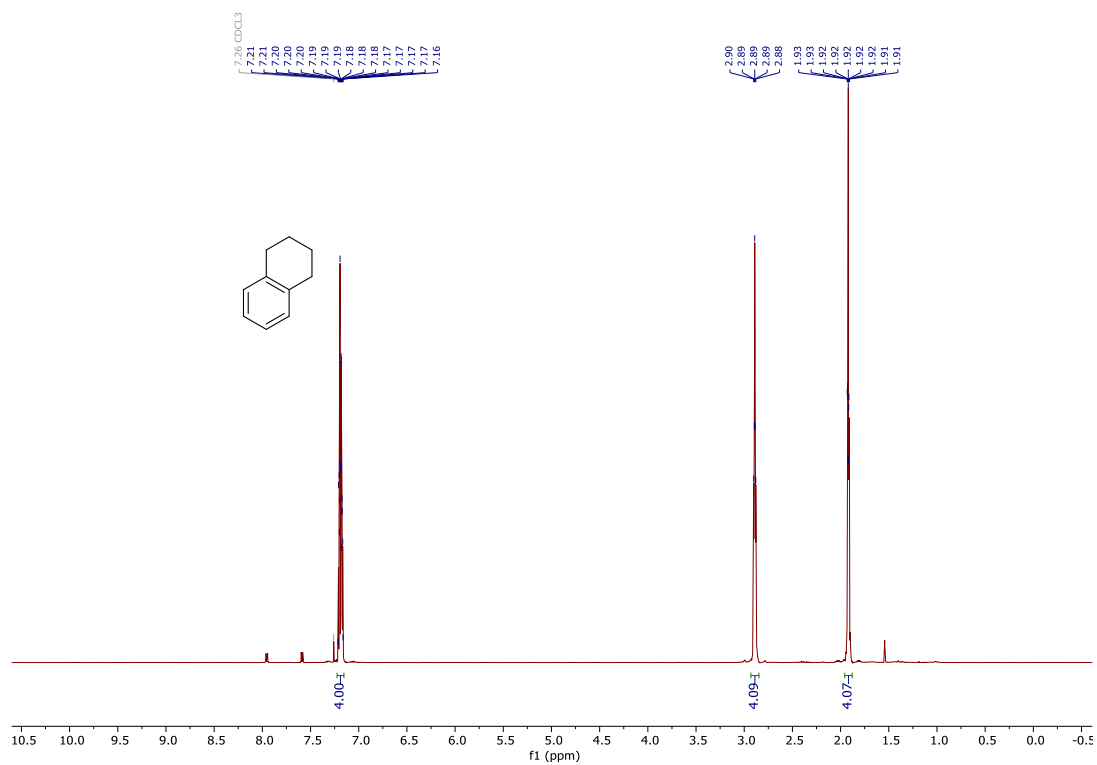

# <sup>1</sup>H-NMR spectrum in CDCl<sub>3</sub>:

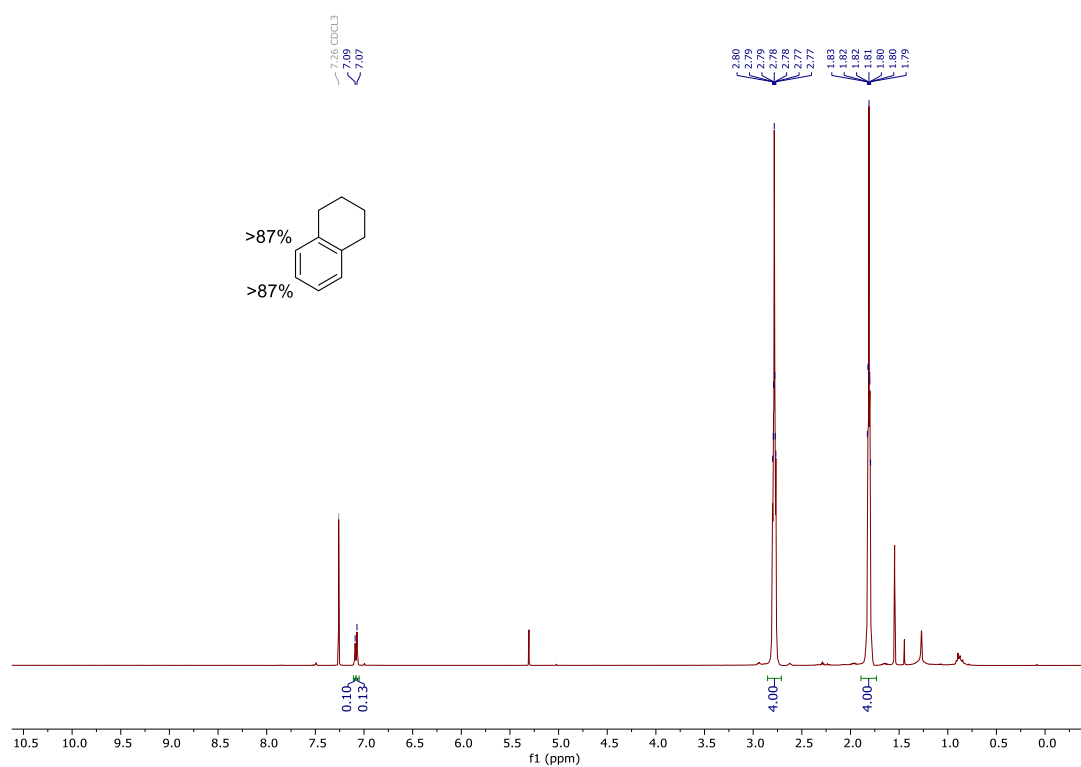

**<sup>13</sup>C-NMR spectrum in CDCl<sub>3</sub>:**

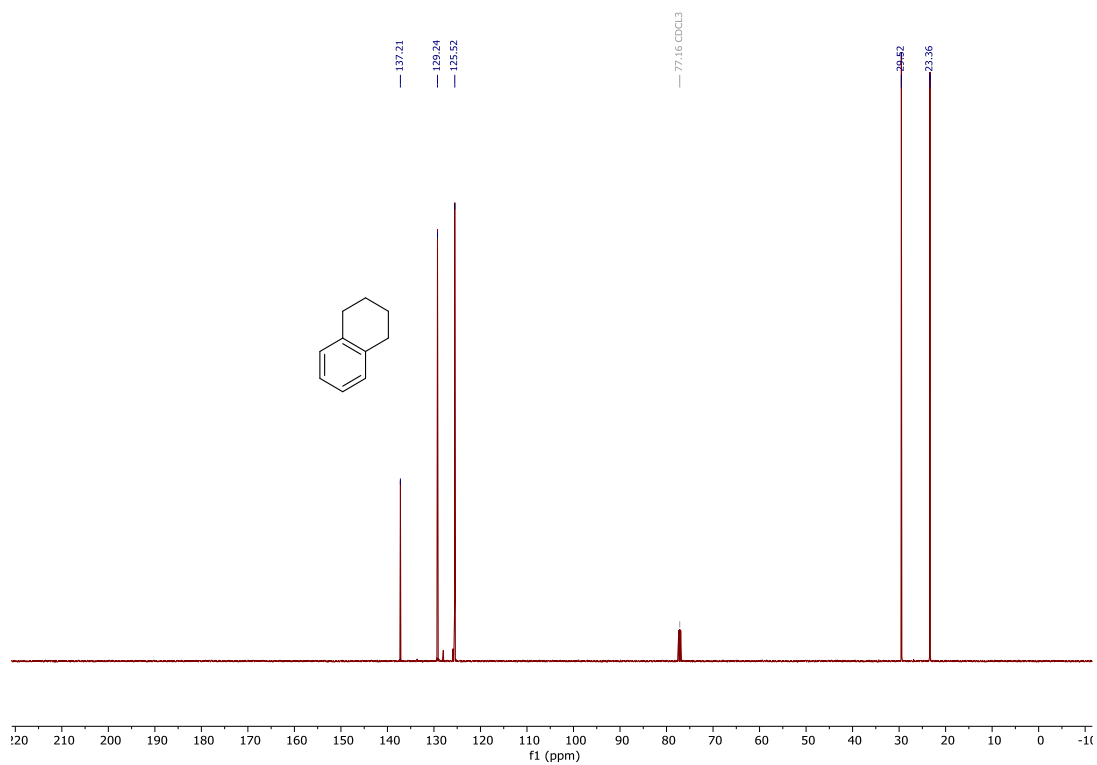

**<sup>13</sup>C-NMR spectrum in CDCl<sub>3</sub>:**

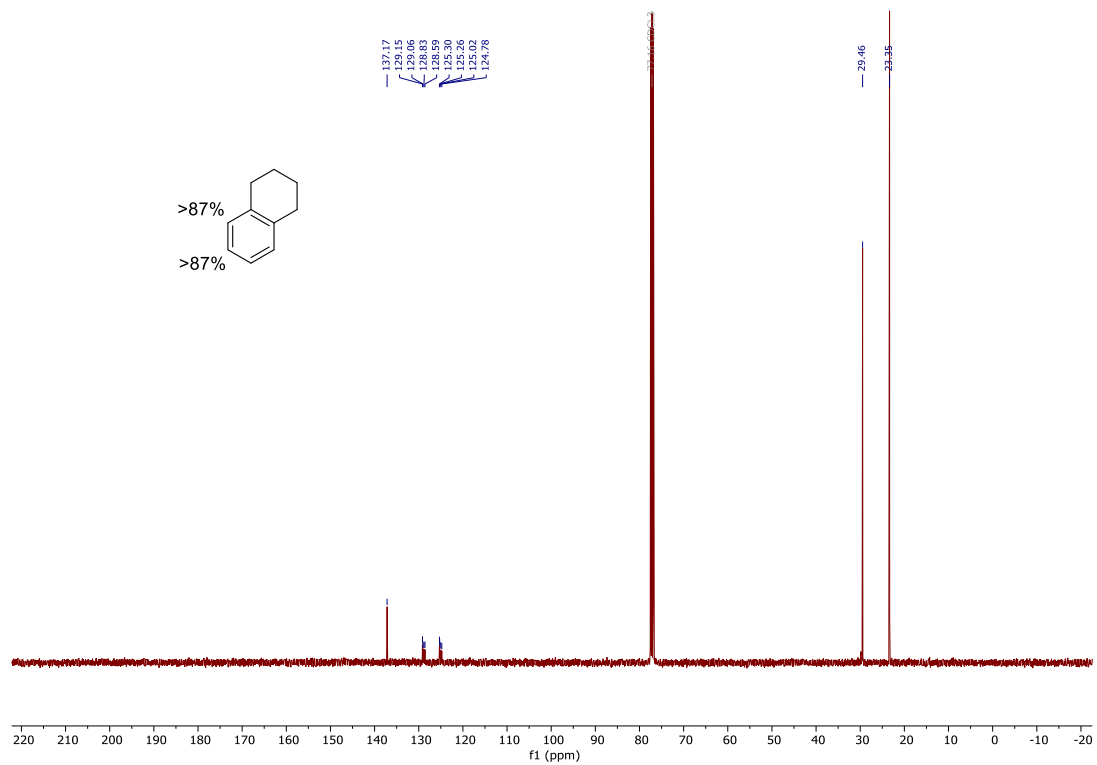

## Deuteration of 1-bromo-2-isopropylbenzene (**8**):

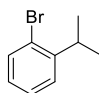

Following the general procedure E and using 1-bromo-2-isopropylbenzene (**8**) (39.8 mg, 0.200 mmol), and purification via silica gel column chromatography using pentane as the eluent, the target compound [**D**]**8** was obtained as colorless liquid (23.5 mg, 58%). The degree of deuteration was determined by mass spectrometry.

**Deuterium Incorporation:** 2.84 D/molecule [Mass]; 2.90 D/molecule [<sup>1</sup>H-NMR].

### NMR Data of Starting Material:

<sup>1</sup>H NMR (600 MHz, C<sub>6</sub>D<sub>6</sub>) δ = 7.44-7.38 (m, 1H), 7.00 (dd, *J* = 7.8, 1.8 Hz, 1H), 6.98-6.93 (m, 1H), 6.68 (ddd, *J* = 7.9, 7.3, 1.8 Hz, 1H), 3.38 (hept, *J* = 6.9 Hz, 1H), 1.07 (d, *J* = 6.9 Hz, 3H) ppm.

<sup>13</sup>C NMR (150 MHz, C<sub>6</sub>D<sub>6</sub>) δ = 147.5, 133.2, 127.9, 127.6, 127.0, 124.7, 33.1, 22.8 ppm.

### NMR Data of Product:

<sup>1</sup>H NMR (600 MHz, C<sub>6</sub>D<sub>6</sub>) δ = 7.42 (s, 0.05H, 95% D), 7.00 (s, 0.94H, 6% D), 6.95 (d, *J* = 7.7 Hz, 0.06H, 94% H), 6.67 (s, 0.05H, 95% D), 3.39 (hept, *J* = 6.8 Hz, 1H), 1.07 (d, *J* = 6.9 Hz, 6H) ppm.

<sup>13</sup>C NMR (150 MHz, C<sub>6</sub>D<sub>6</sub>) δ = 147.5, 132.9-132.4 (1C), 128.6-124.5 (4C), 33.1, 22.8 ppm.

### Mass Data:

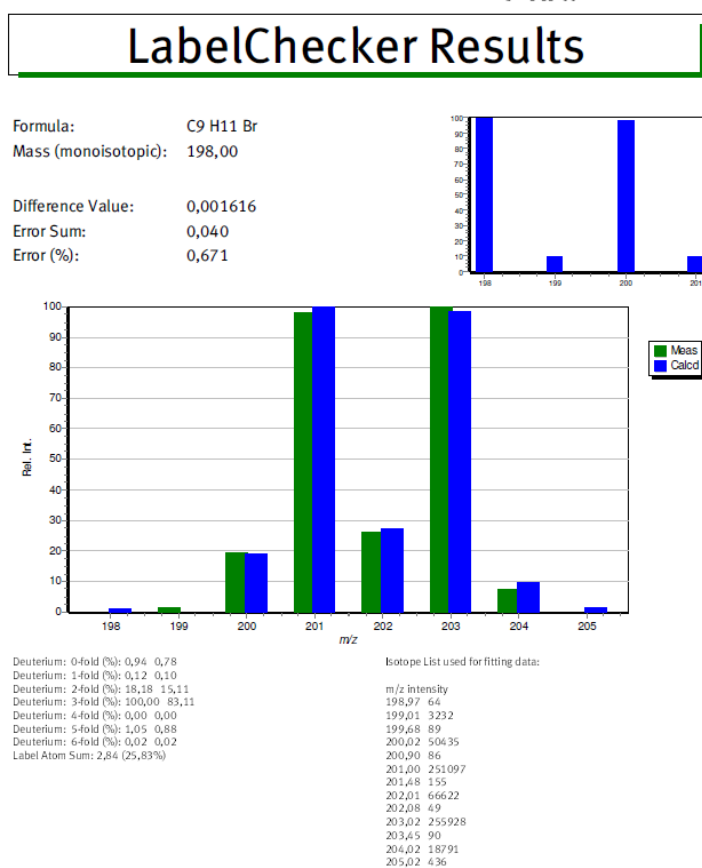



**<sup>13</sup>C-NMR spectrum in C<sub>6</sub>D<sub>6</sub>:**

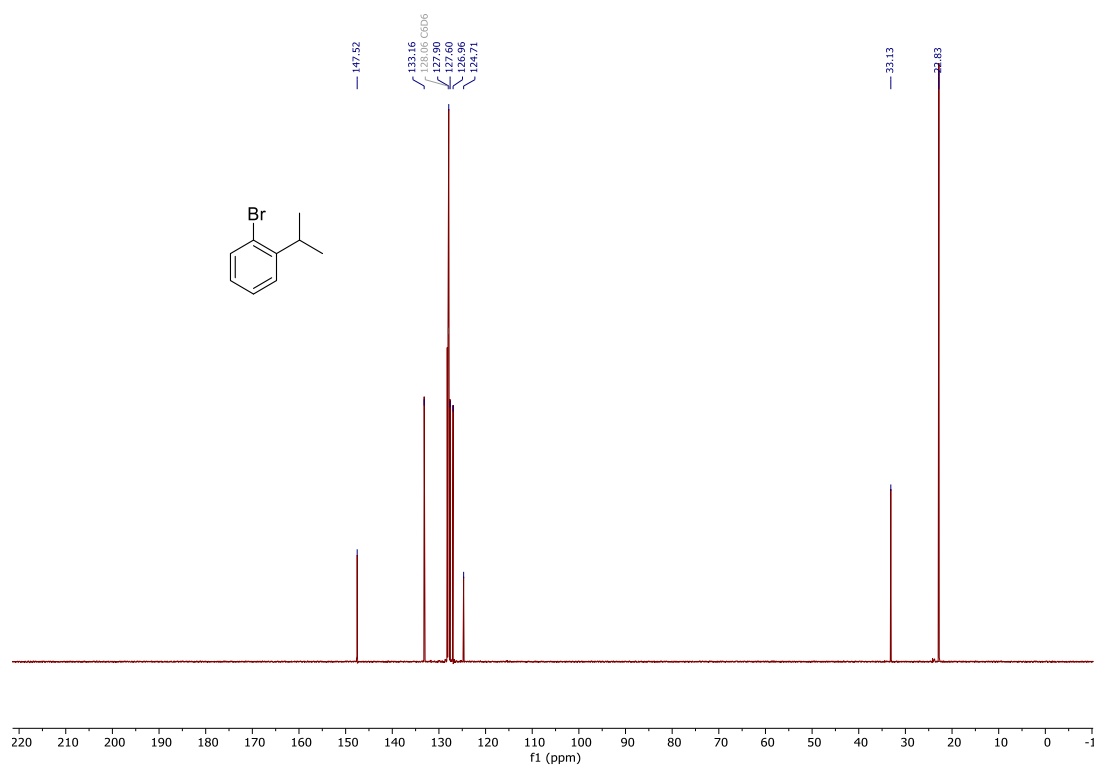

**<sup>13</sup>C-NMR spectrum in C<sub>6</sub>D<sub>6</sub>:**

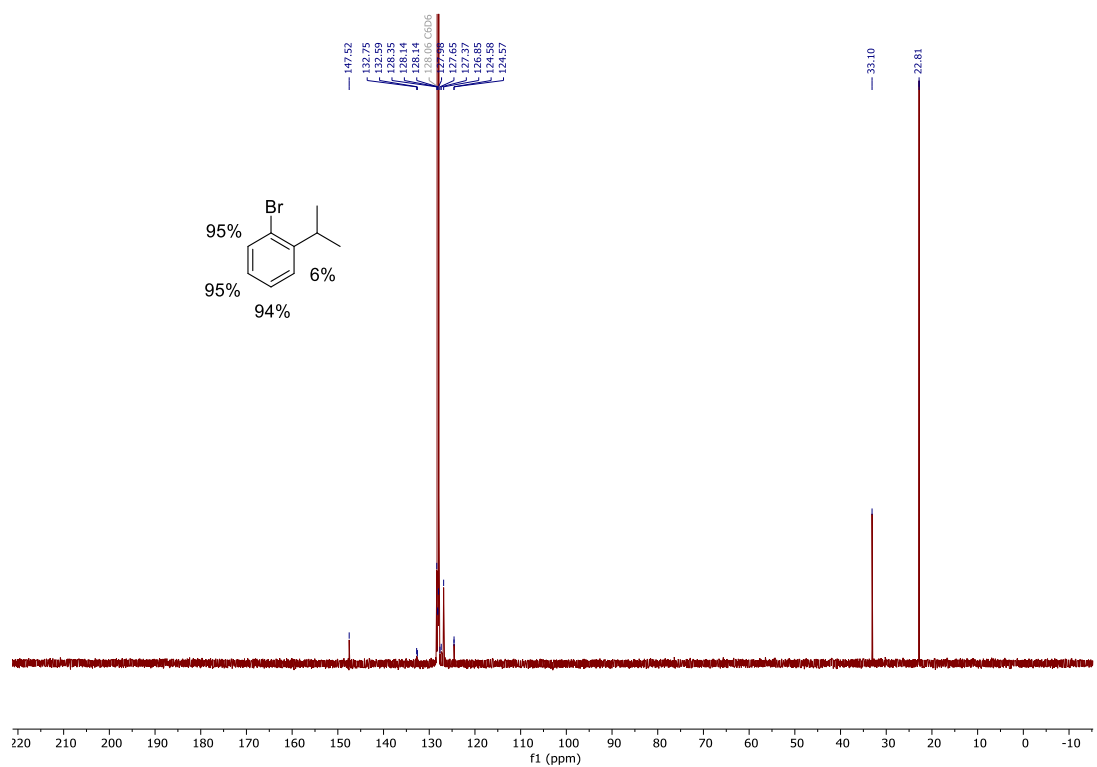

## Deuteration of isobutyl 2-methylbenzoate (9):

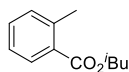

Following the general procedure F and using isobutyl 2-methylbenzoate (9) (38.5 mg, 0.200 mmol), and purification via silica gel column chromatography using pentane:Et<sub>2</sub>O = 50:1 as the eluent, the target compound [D]9 was obtained as colorless liquid (34.0 mg, 87%). The degree of deuteration was determined by mass spectrometry.

**Deuterium Incorporation:** 3.97 D/molecule [Mass]; 3.76 D/molecule [<sup>1</sup>H-NMR].

### NMR Data of Starting Material:

<sup>1</sup>H NMR (400 MHz, CDCl<sub>3</sub>) δ = 7.98-7.84 (m, 1H), 7.43-7.36 (m, 1H), 7.28-7.20 (m, 2H), 4.09 (d, *J* = 6.6 Hz, 2H), 2.61 (s, 3H), 2.07 (dh, *J* = 13.4, 6.7 Hz, 1H), 1.03 (d, *J* = 6.8 Hz, 6H) ppm.

<sup>13</sup>C NMR (101 MHz, CDCl<sub>3</sub>) δ = 167.9, 140.2, 132.0, 131.8, 130.7, 130.1, 125.8, 71.1, 28.0, 22.0, 19.5 ppm.

### NMR Data of Product:

<sup>1</sup>H NMR (400 MHz, CDCl<sub>3</sub>) δ = 7.93 (s, 0.06H, 94% D), 7.39 (s, 0.06H, 94% D), 7.25 (s, 0.12H, 94% D), 4.09 (d, *J* = 6.5 Hz, 2H), 2.61 (s, 3H), 2.07 (dh, *J* = 13.4, 6.7 Hz, 1H), 1.03 (d, *J* = 6.8 Hz, 6H) ppm.

<sup>13</sup>C NMR (100 MHz, CDCl<sub>3</sub>) δ = 167.9, 140.1, 132.0-130.8 (2C), 130.8-130.0 (1C), 130.0, 125.8-124.7 (1C), 71.1, 28.0, 21.9, 19.4 ppm.

### Mass Data:

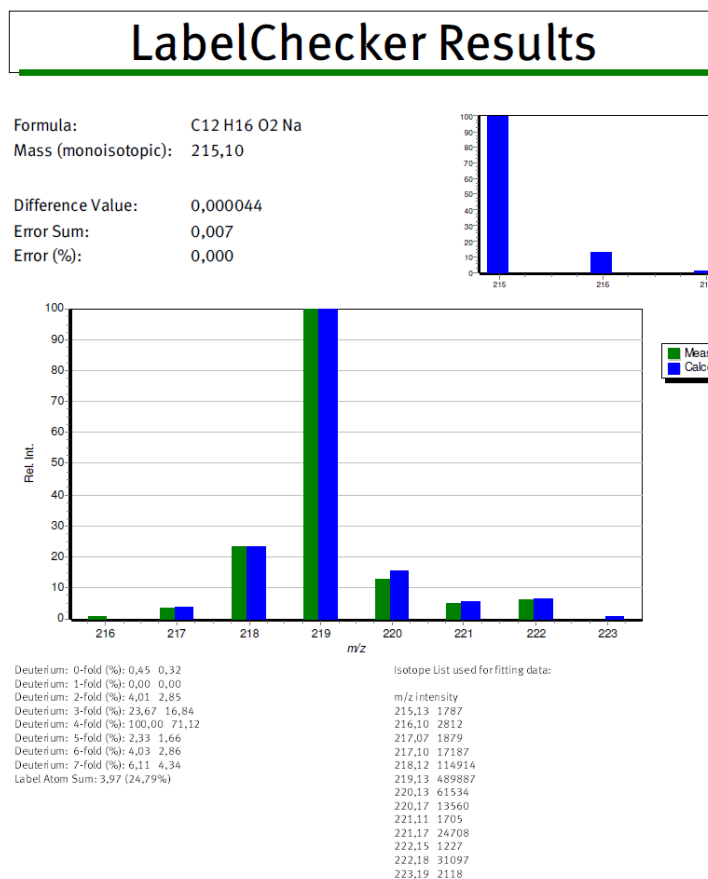



### <sup>13</sup>C-NMR spectrum in CDCl<sub>3</sub>:

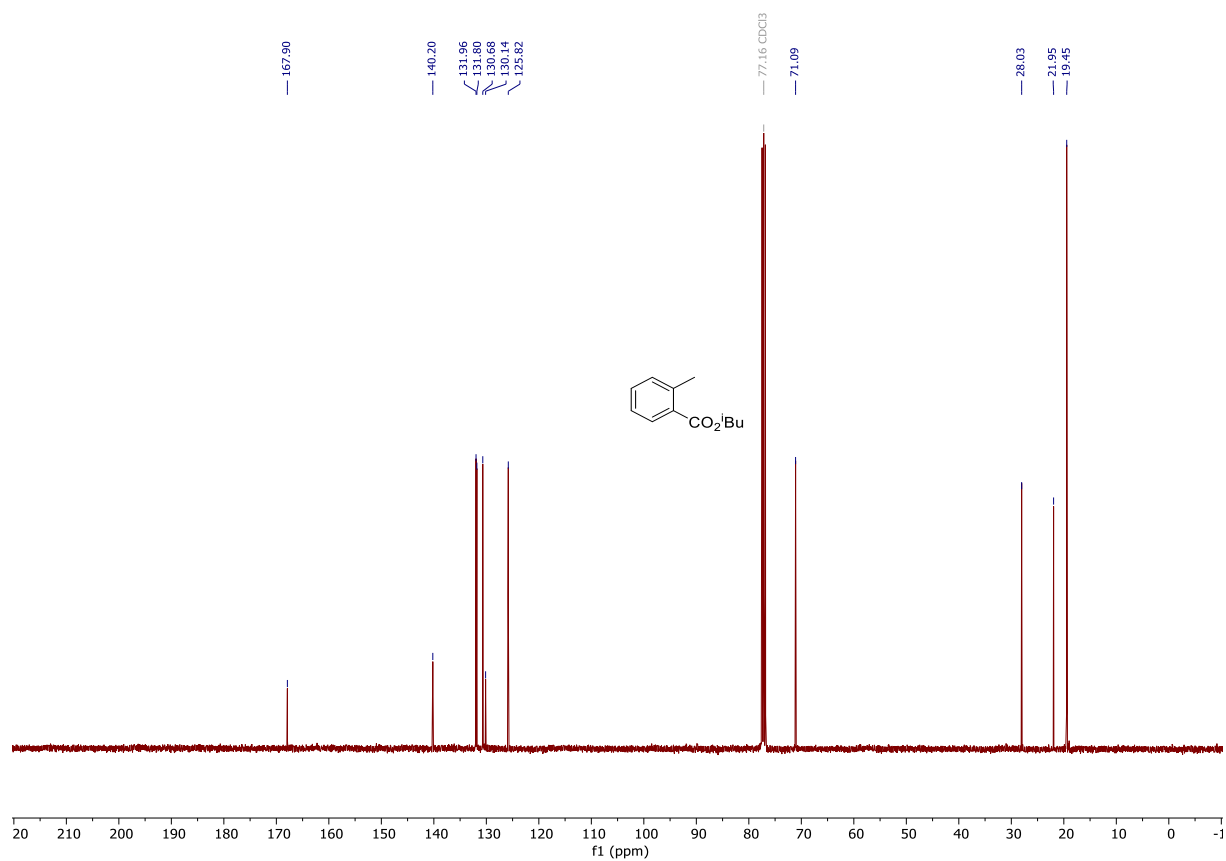

### <sup>13</sup>C-NMR spectrum in CDCl<sub>3</sub>:

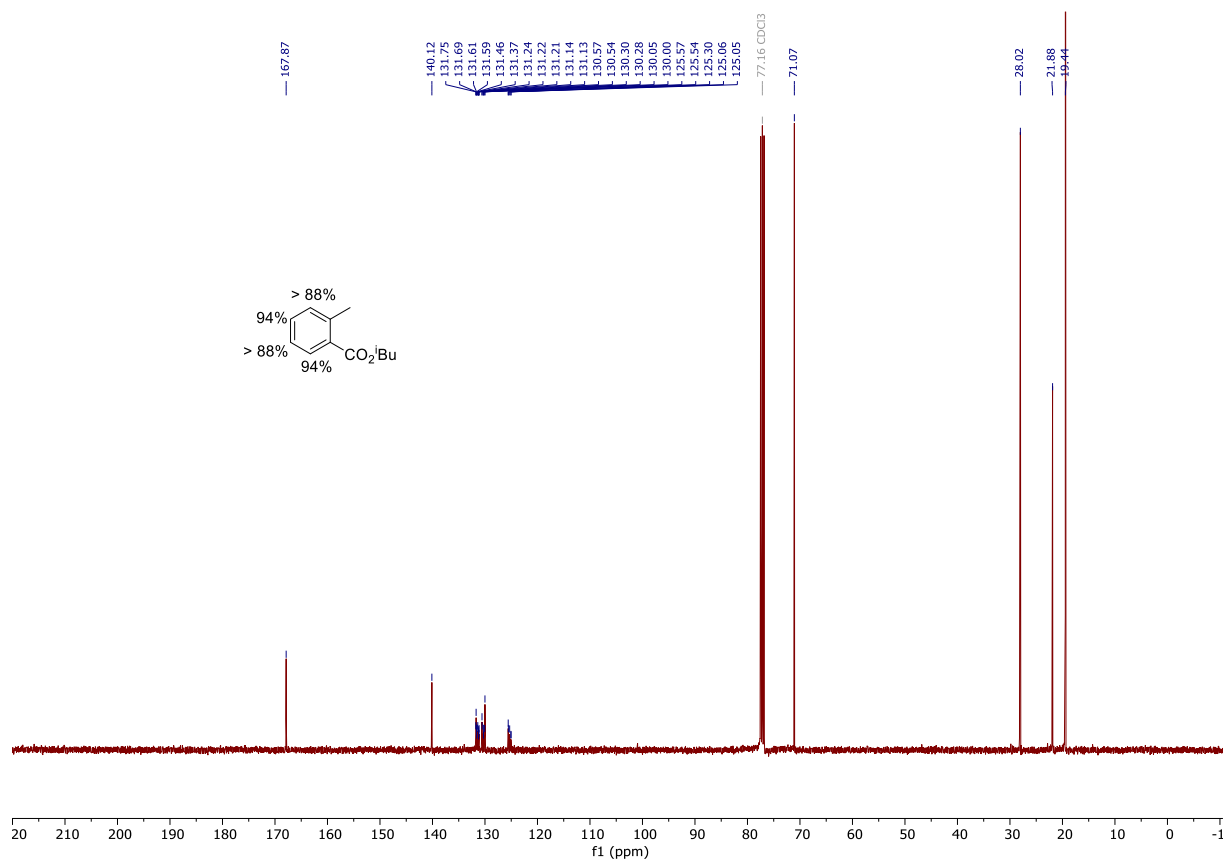



## Deuteration of *N,N*-diisopropyl-2-methylbenzamide (**10**):

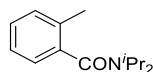

Following the general procedure F and using *N,N*-diisopropyl-2-methylbenzamide (**10**) (43.9 mg, 0.200 mmol), and purification via silica gel column chromatography using pentane:EtOAc = 9:1 as the eluent, the target compound [**D**]**10** was obtained as colorless liquid (41.2 mg, 93%). The degree of deuteration was determined by mass spectrometry.

**Deuterium Incorporation:** 3.32 D/molecule [Mass]; 3.36 D/molecule [<sup>1</sup>H-NMR].

### NMR Data of Starting Material:

<sup>1</sup>H NMR (500 MHz, CDCl<sub>3</sub>) δ = 7.25-7.20 (m, 1H), 7.20-7.14 (m, 2H), 7.10-7.07 (m, 1H), 3.66 (hept, *J* = 6.8 Hz, 1H), 3.51 (hept, *J* = 6.8 Hz, 1H), 2.31 (s, 3H), 1.58 (d, *J* = 6.8 Hz, 6H), 1.12 (d, *J* = 6.7 Hz, 3H), 1.08 (d, *J* = 6.7 Hz, 3H) ppm.

<sup>13</sup>C NMR (126 MHz, CDCl<sub>3</sub>) δ = 170.8, 138.8, 133.7, 130.5, 128.2, 125.9, 124.8, 50.9, 45.9, 21.1, 20.90, 20.86, 20.7, 18.9 ppm.

### NMR Data of Product:

<sup>1</sup>H NMR (400 MHz, CDCl<sub>3</sub>) δ = 7.21 (s, 0.05H, 95% D), 7.19-7.14 (m, 0.12H, 94% D), 7.08 (s, 0.46H, 54% D), 3.65 (hept, *J* = 6.7 Hz, 1H), 3.50 (hept, *J* = 6.8 Hz, 1H), 2.31 (s, 3H), 1.57 (d, *J* = 6.5 Hz, 6H), 1.11 (d, *J* = 6.7 Hz, 3H), 1.07 (d, *J* = 6.7 Hz, 3H) ppm.

<sup>13</sup>C NMR (101 MHz, CDCl<sub>3</sub>) δ = 170.8, 138.7, 133.6, 130.4-129.5 (1C), 128.0-127.3 (1C), 125.9-124.9 (1C), 124.8-123.9 (1C), 50.8, 45.8, 21.0, 20.84, 20.80, 20.7, 18.8 ppm.

### Mass Data:

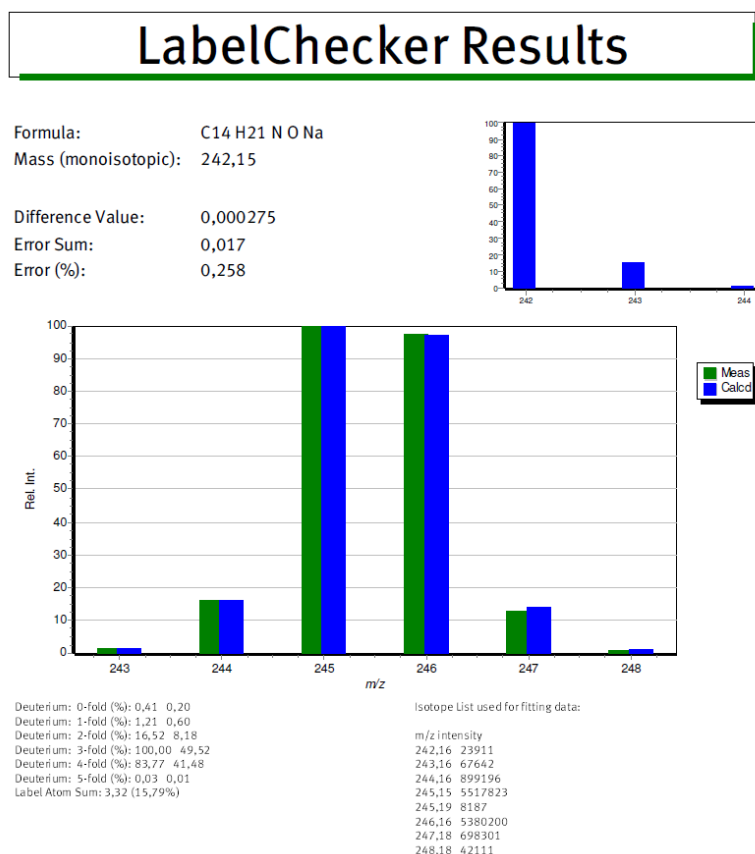

**<sup>1</sup>H-NMR spectrum in CDCl<sub>3</sub>:**

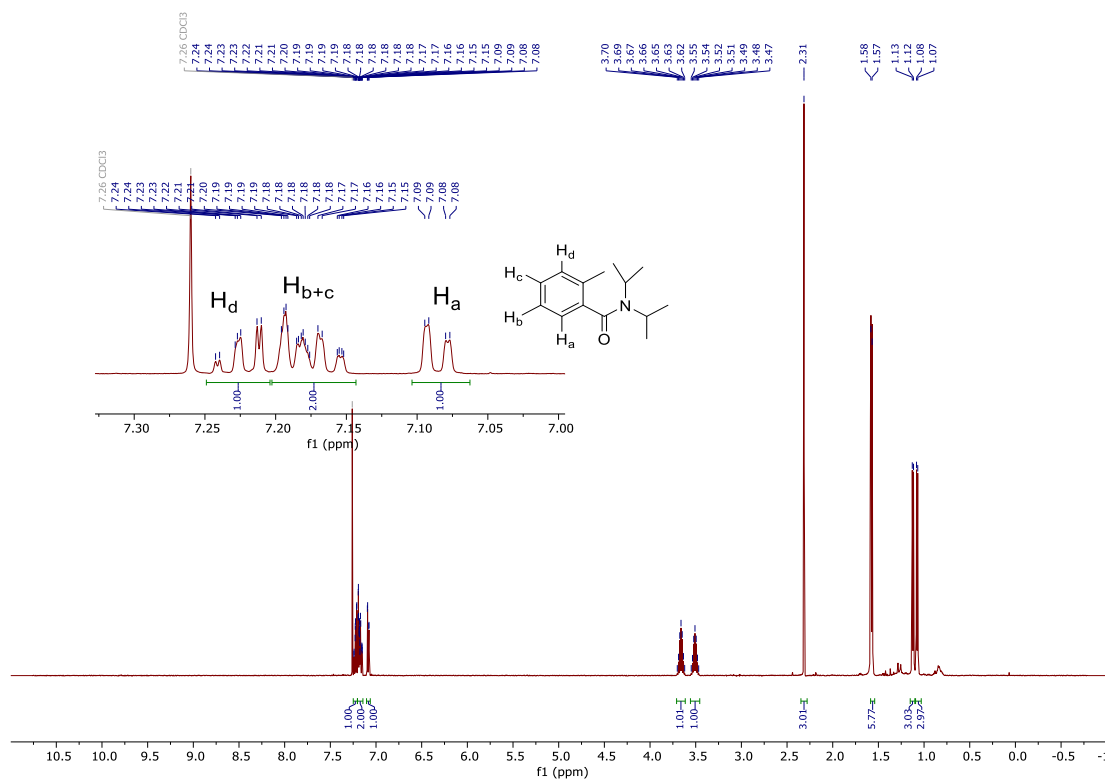

**<sup>1</sup>H-NMR spectrum in CDCl<sub>3</sub>:**

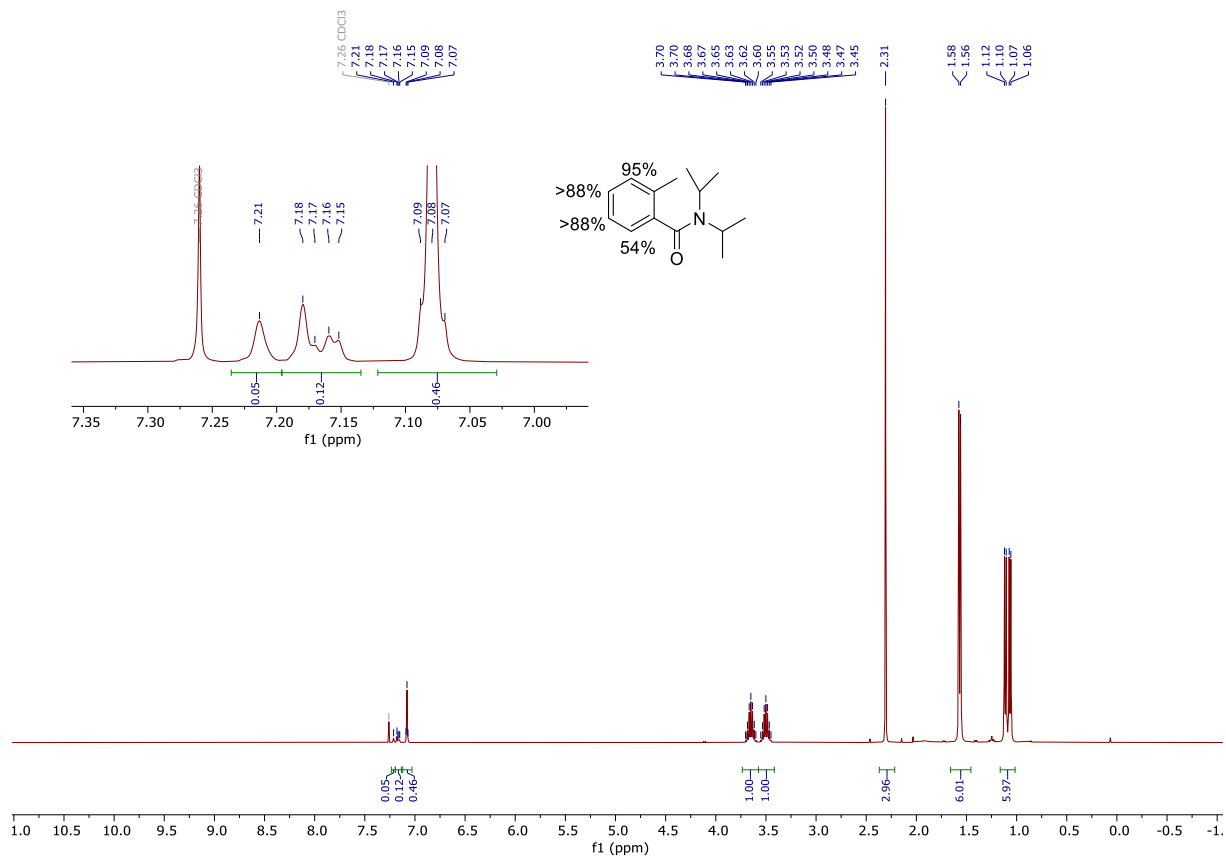

### <sup>13</sup>C-NMR spectrum in CDCl<sub>3</sub>:

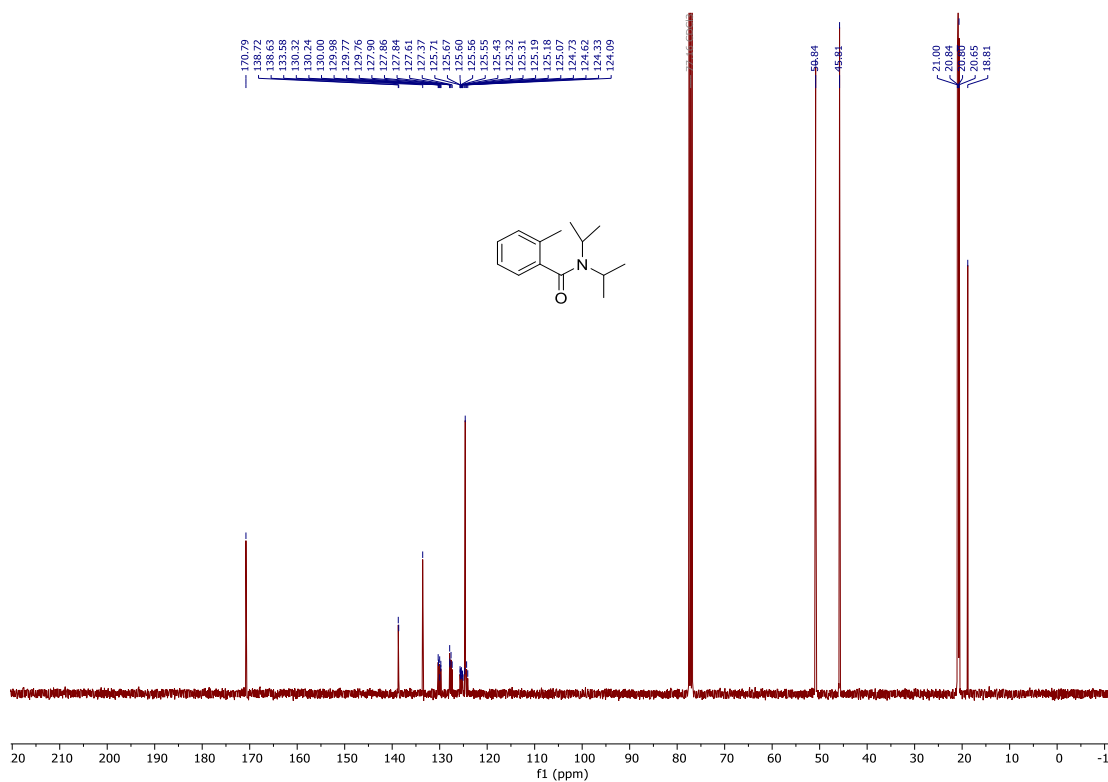

### <sup>13</sup>C-NMR spectrum in CDCl<sub>3</sub>:

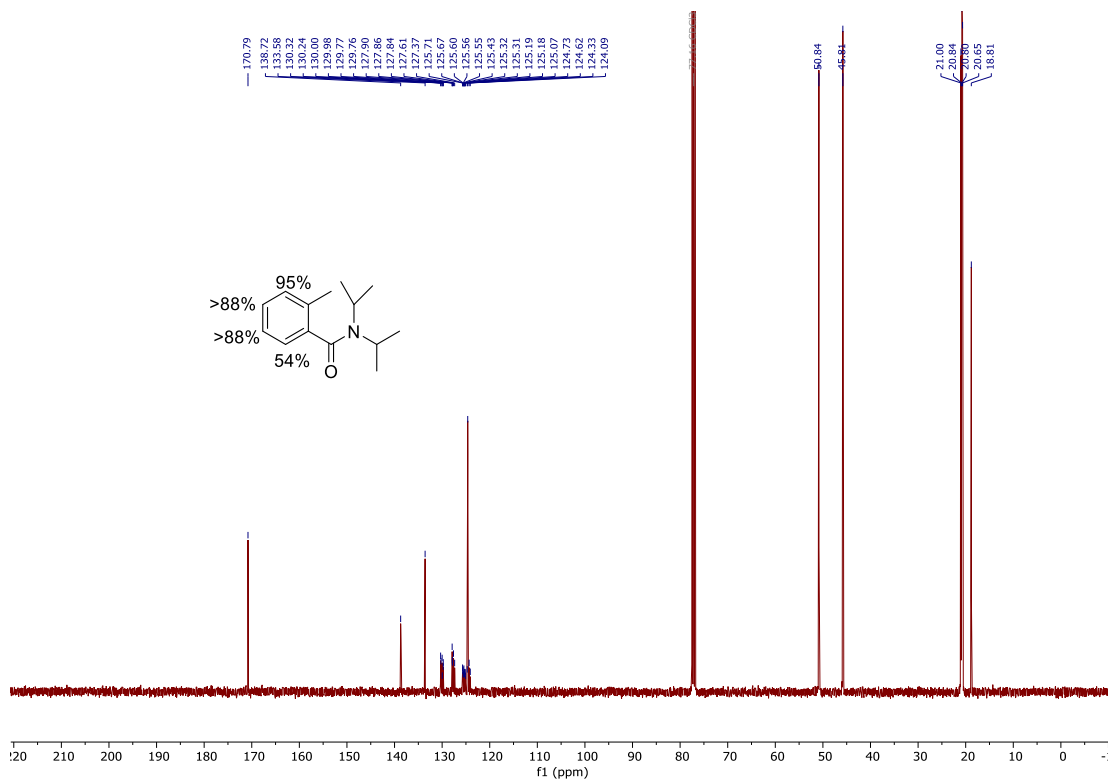

## Deuteration of 1-(heptyloxy)-3-methylbenzene (**11**):

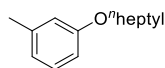

Following the general procedure E and using 1-(heptyloxy)-3-methylbenzene (**11**) (41.3 mg, 0.200 mmol), and purification via silica gel column chromatography using pentane:Et<sub>2</sub>O = 50:1 as the eluent, the target compound [**D**]**11** was obtained as colorless liquid (33.6 mg, 80%). The degree of deuteration was determined by mass spectrometry.

**Deuterium Incorporation:** 3.82 D/molecule [Mass]; 3.80 D/molecule [<sup>1</sup>H-NMR].

### NMR Data of Starting Material:

<sup>1</sup>H NMR (600 MHz, CDCl<sub>3</sub>) δ = 7.19 (t, *J* = 7.8 Hz, 1H), 6.78 (d, *J* = 7.5 Hz, 1H), 6.76 (s, 1H), 6.74 (d, *J* = 8.3 Hz, 1H), 3.97 (t, *J* = 6.6 Hz, 2H), 2.36 (s, 3H), 1.81 (p, *J* = 6.7 Hz, 2H), 1.49 (p, *J* = 7.7, 7.3 Hz, 2H), 1.44-1.29 (m, 6H), 0.94 (t, *J* = 6.8 Hz, 3H) ppm.

<sup>13</sup>C NMR (150 MHz, CDCl<sub>3</sub>) δ = 159.3, 139.5, 129.3, 121.4, 115.5, 111.5, 68.0, 32.0, 29.5, 29.2, 26.2, 22.8, 21.7, 14.2 ppm.

### NMR Data of Product:

<sup>1</sup>H NMR (600 MHz, CDCl<sub>3</sub>) δ = 7.16 (s, 0.05H, 95% D), 6.76 (s, 0.05H, 95% D), 6.74 (s, 0.05H, 95% D), 6.71 (s, 0.05H, 95% D), 3.94 (t, *J* = 6.6 Hz, 2H), 2.33 (s, 3H), 1.81-1.75 (m, 2H), 1.49-1.43 (m, 2H), 1.39-1.29 (m, 6H), 0.91 (t, *J* = 7.0 Hz, 3H) ppm.

<sup>13</sup>C NMR (150 MHz, CDCl<sub>3</sub>) δ = 159.2, 139.4, 129.2-128.3 (1C), 121.5-120.4 (1C), 115.9-114.7 (1C), 111.7-110.6 (1C), 68.0, 32.0, 29.5, 29.2, 26.2, 22.8, 21.6, 14.2 ppm.

### Mass Data:

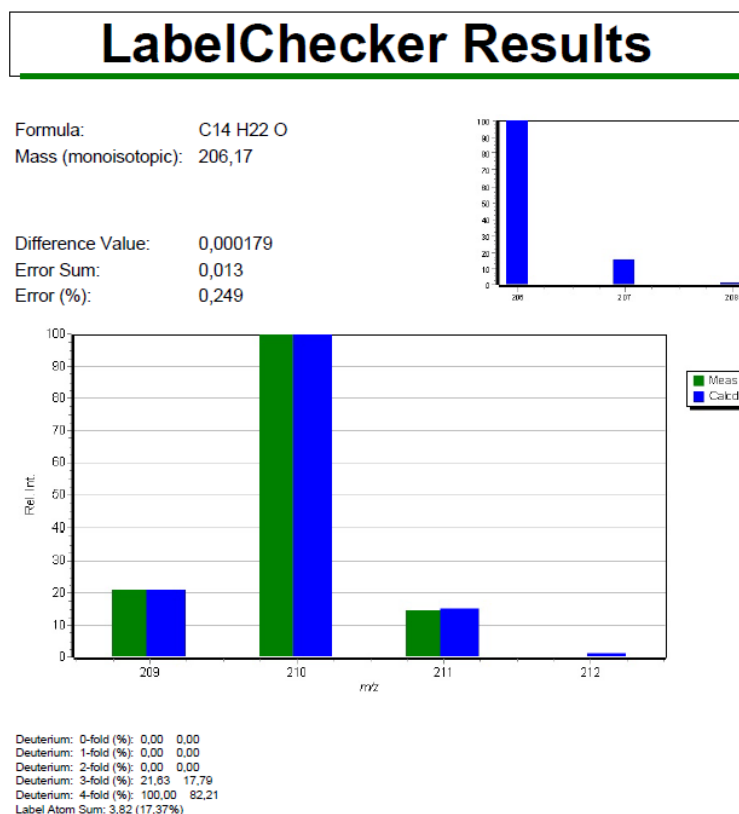



### <sup>13</sup>C-NMR spectrum in CDCl<sub>3</sub>:

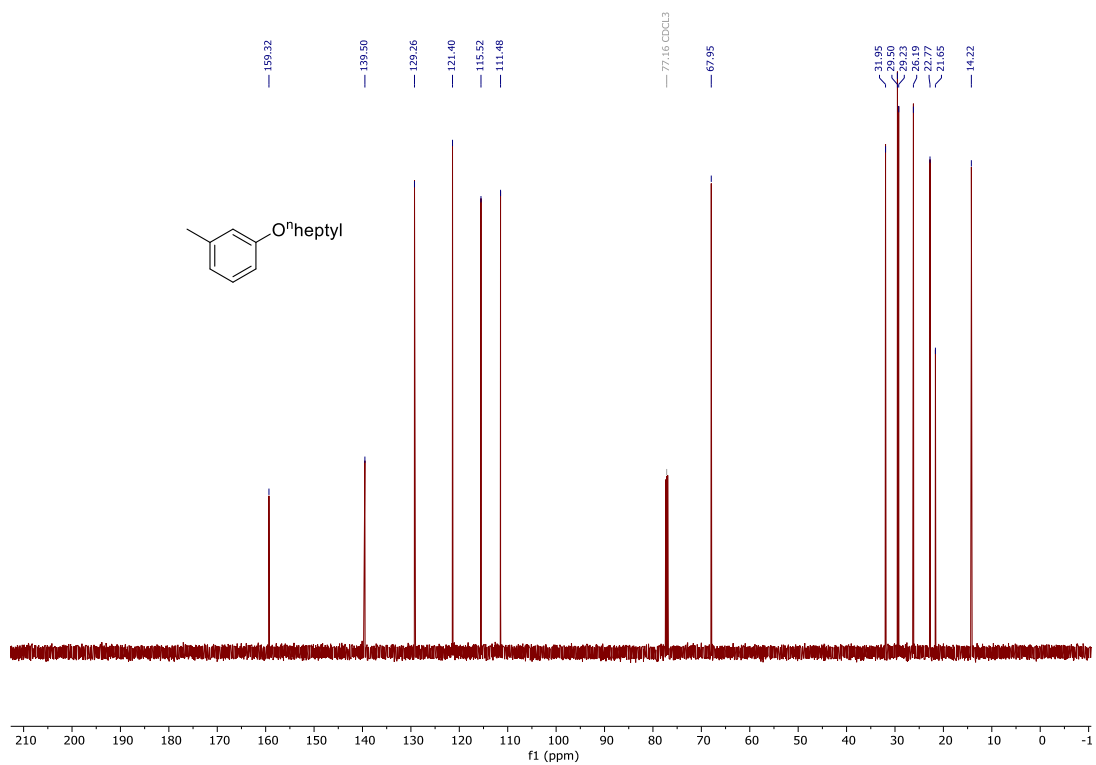

### <sup>13</sup>C-NMR spectrum in CDCl<sub>3</sub>:

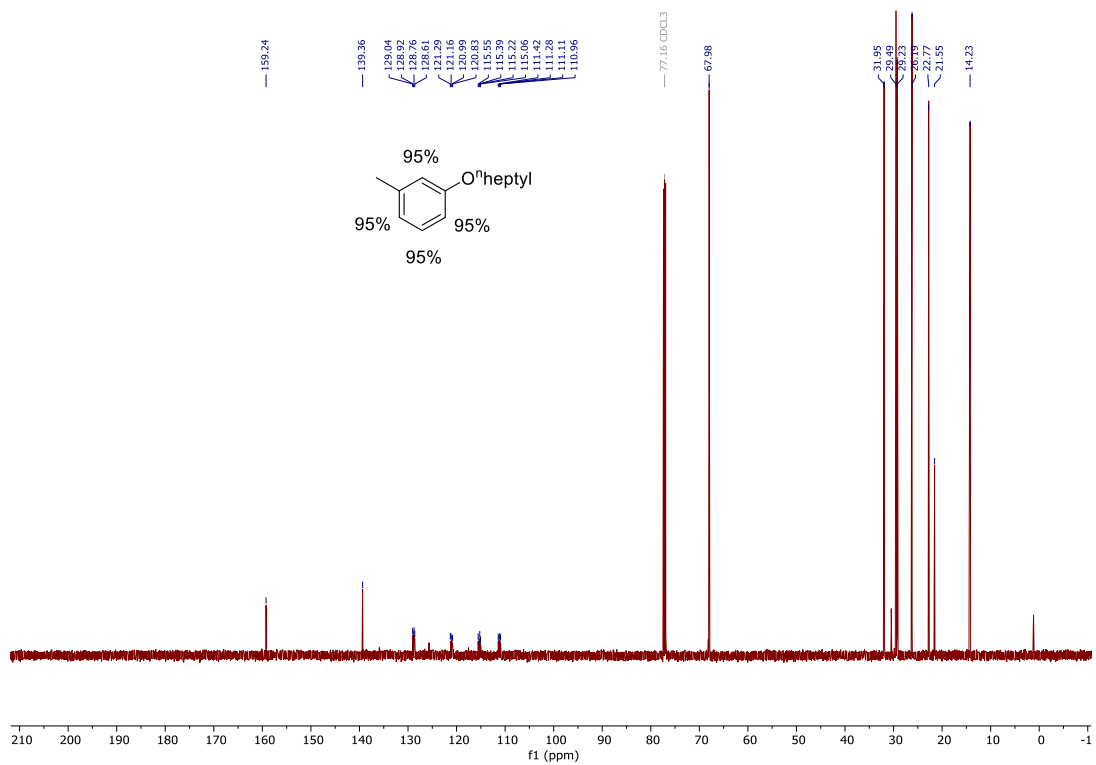

## Deuteration of 3-(*tert*-butyl)phenol (**12**) using Conditions A:

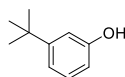

Following the general procedure E, using 3-(*tert*-butyl)phenol (**12**) (30.0 mg, 0.200 mmol), and purification via silica gel column chromatography using pentane:EtOAc = 19:1 as the eluent the target compound [**D**]12 was obtained as light-yellow liquid (23.7 mg, 79%). The degree of deuteration was determined by mass spectrometry.

**Deuterium Incorporation:** 1.99 D/molecule [Mass]; 2.18 D/molecule [<sup>1</sup>H-NMR].

### NMR Data of Starting Material:

<sup>1</sup>H NMR (400 MHz, CDCl<sub>3</sub>) δ = 7.18 (t, *J* = 7.9 Hz, 1H), 7.00-6.95 (m, 1H), 6.89-6.85 (m, 1H), 6.68-6.62 (m, 1H), 4.56 (s, br s, OH), 1.31 (s, 9H) ppm.

<sup>13</sup>C NMR (101 MHz, CDCl<sub>3</sub>) δ = 155.4, 153.5, 129.3, 118.0, 112.7, 112.4, 34.8, 31.4 ppm.

### NMR Data of Product:

<sup>1</sup>H NMR (400 MHz, CDCl<sub>3</sub>) δ = 7.21-7.15 (m, 0.05H, 95% D), 6.99-6.95 (m, 0.86H, 14% D), 6.90-6.84 (m, 0.85H, 15% D), 6.69-6.63 (m, 0.06H, 94% D), 4.70 (s, br s, OH), 1.31 (s, 9H) ppm.

<sup>13</sup>C NMR (101 MHz, CDCl<sub>3</sub>) δ = 155.3, 153.5, 129.7-128.2 (1H), 118.2-117.5 (1H), 112.7, 112.4-111.6 (1H), 34.8, 31.4 ppm.

### Mass Data:

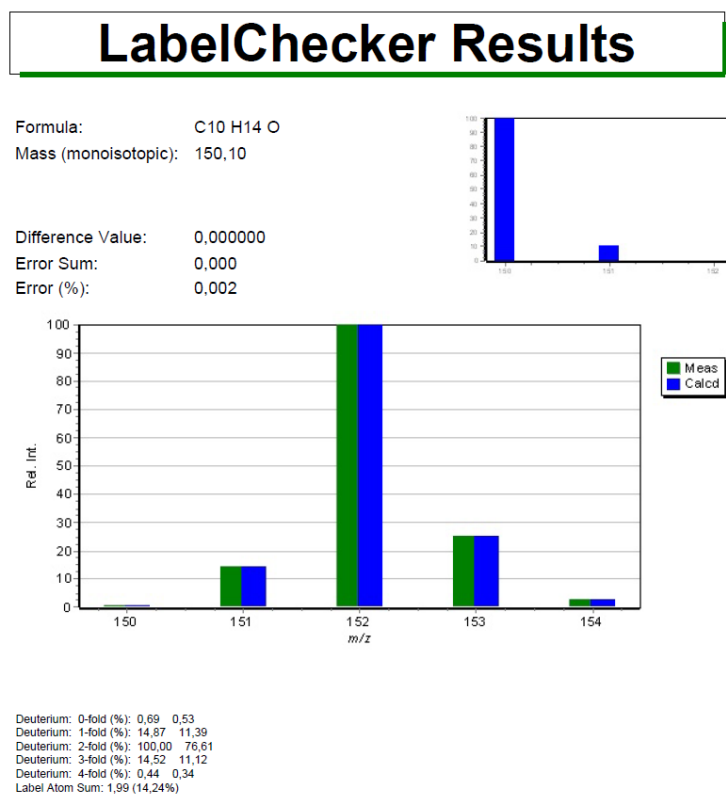

**<sup>1</sup>H-NMR spectrum in CDCl<sub>3</sub>:**

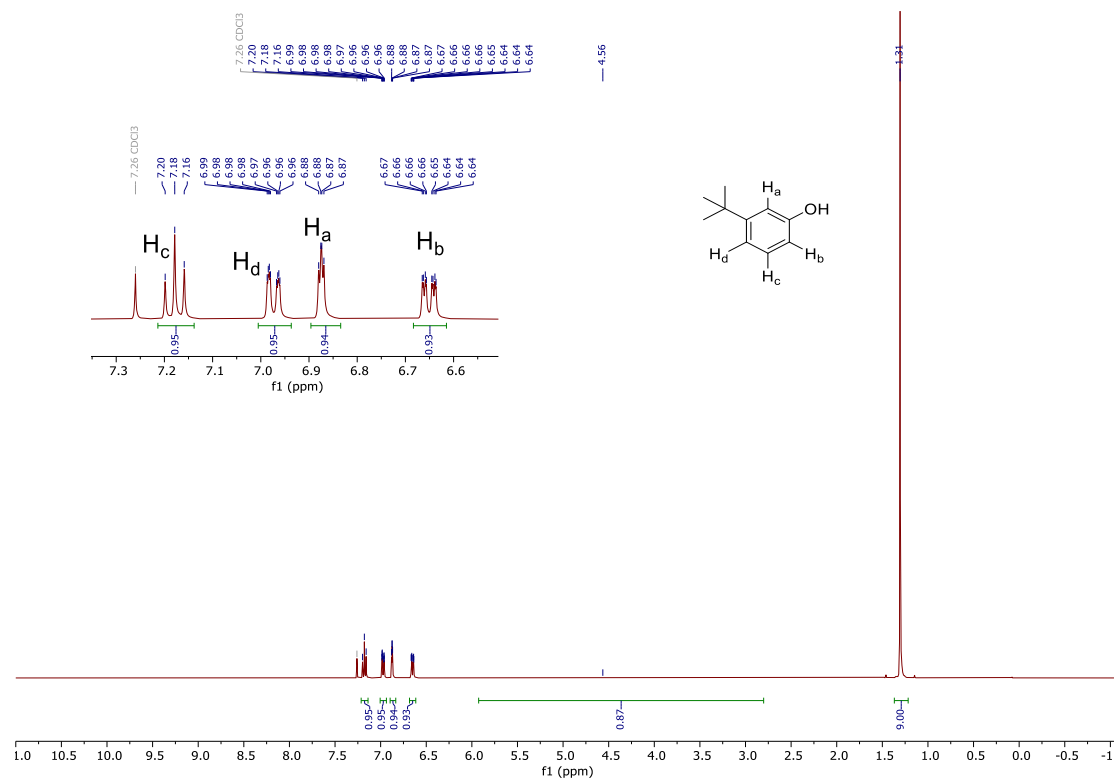

**<sup>1</sup>H-NMR spectrum in CDCl<sub>3</sub>:**

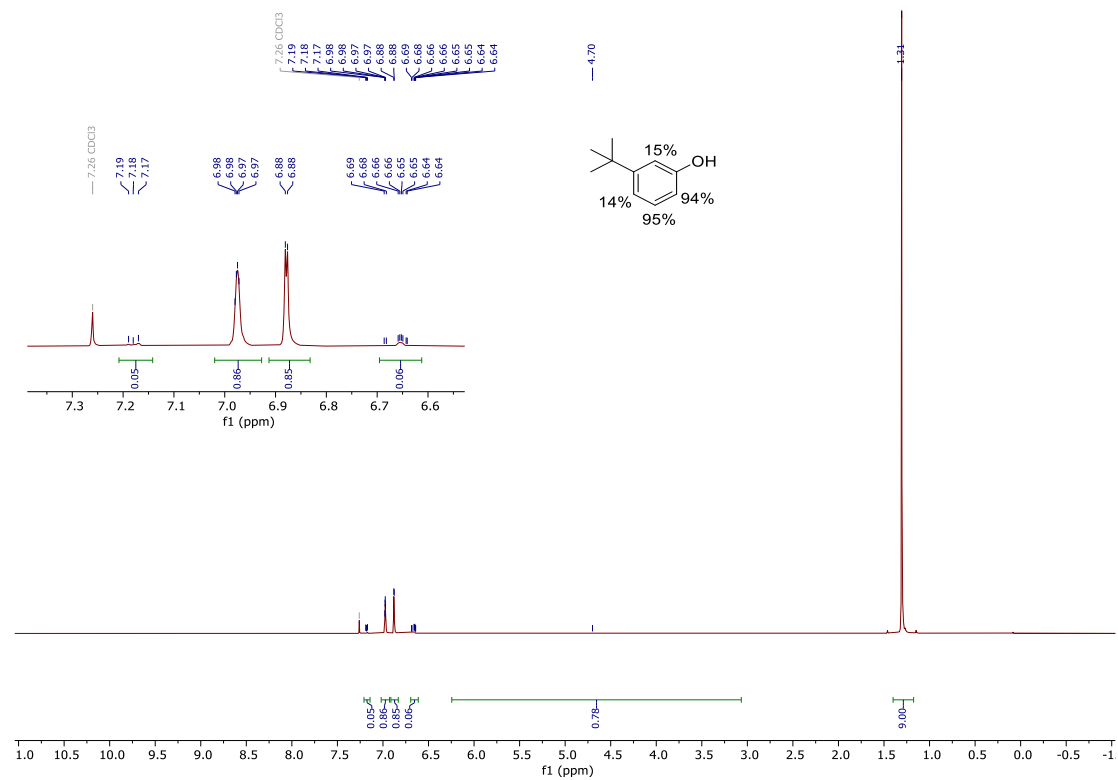



### <sup>13</sup>C-NMR spectrum in CDCl<sub>3</sub>:

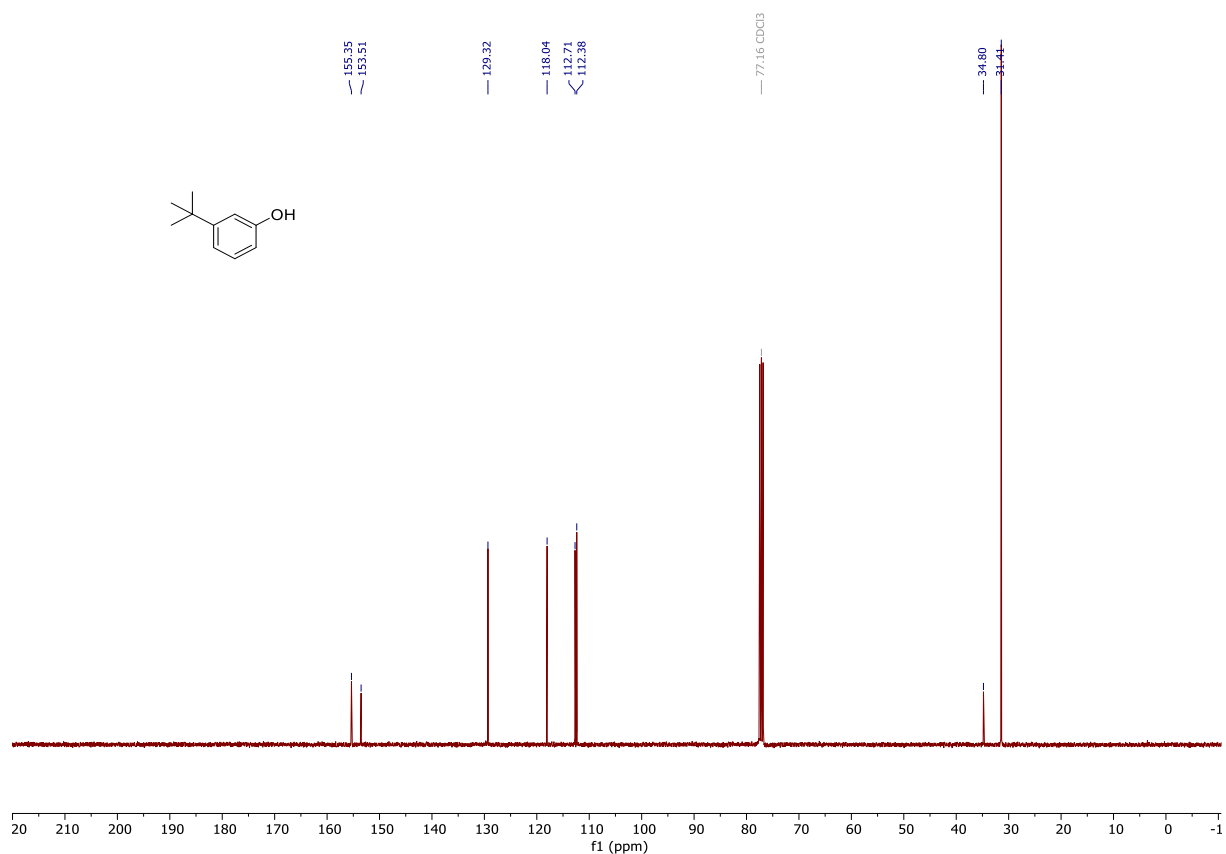

### <sup>13</sup>C-NMR spectrum in CDCl<sub>3</sub>:

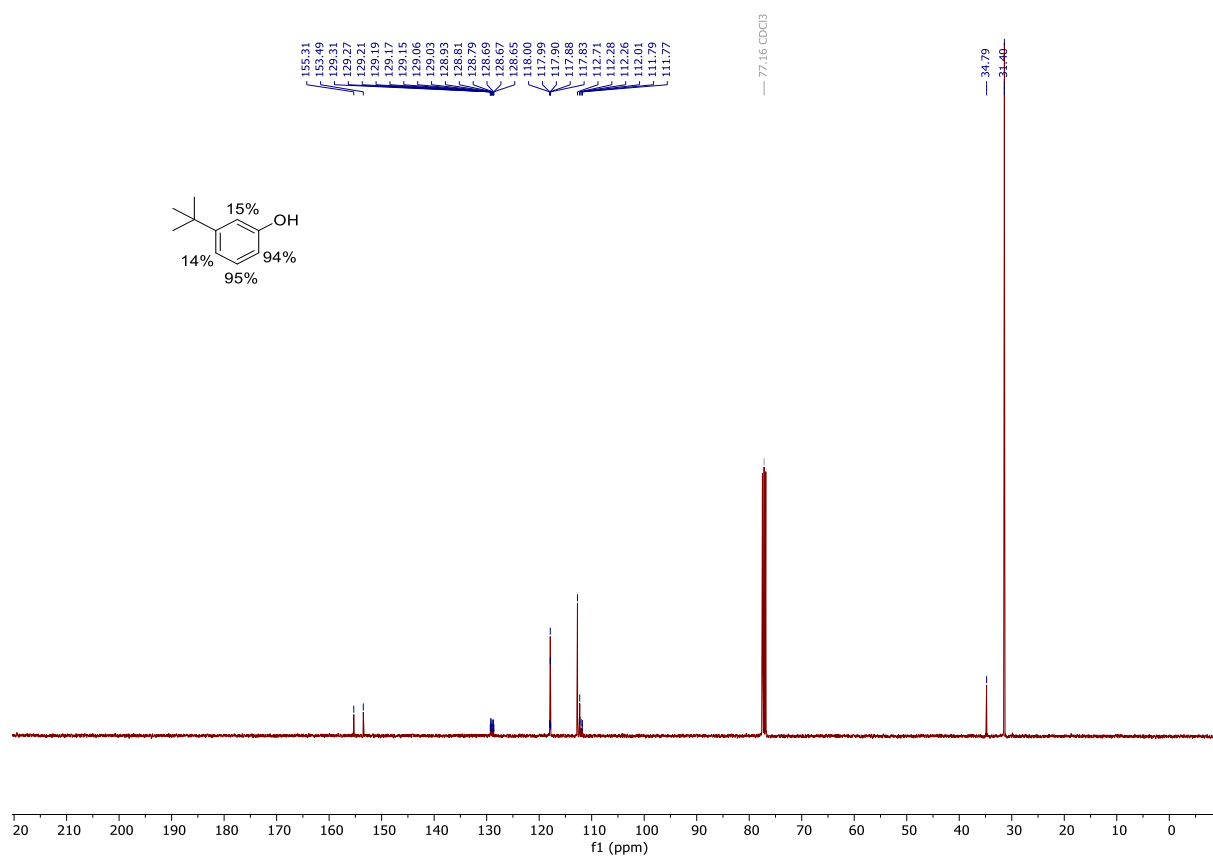

## Deuteration of 3-(*tert*-butyl)phenol (**12**) using Conditions B:

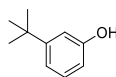

Following the general procedure F, using 3-(*tert*-butyl)phenol (**12**) (30.0 mg, 0.200 mmol), and purification via silica gel column chromatography using pentane:EtOAc = 19:1 as the eluent the target compound [**D**]12 was obtained as light-yellow liquid (27.7 mg, 92%). The degree of deuteration was determined by mass spectrometry.

**Deuterium Incorporation:** 3.34 D/molecule [Mass]; 3.43 D/molecule [<sup>1</sup>H-NMR].

### NMR Data of Starting Material:

<sup>1</sup>H NMR (400 MHz, CDCl<sub>3</sub>) δ = 7.18 (t, *J* = 7.9 Hz, 1H), 7.00-6.95 (m, 1H), 6.89-6.85 (m, 1H), 6.68-6.62 (m, 1H), 4.56 (s, br s, OH), 1.31 (s, 9H) ppm.

<sup>13</sup>C NMR (101 MHz, CDCl<sub>3</sub>) δ = 155.4, 153.5, 129.3, 118.0, 112.7, 112.4, 34.8, 31.4 ppm.

### NMR Data of Product:

<sup>1</sup>H NMR (400 MHz, CDCl<sub>3</sub>) δ = 7.20-7.16 (m, 0.05H, 95% D), 6.99-6.95 (m, 0.22H, 78% D), 6.90-6.87 (m, 0.25H, 75% D), 6.66 (s, 0.05H, 95% D), 5.05 (s, br s, OH), 1.30 (s, 9H) ppm.

<sup>13</sup>C NMR (100 MHz, CDCl<sub>3</sub>) δ = 155.3, 153.3, 129.8-128.0 (1H), 118.3-116.6 (1H), 112.8-111.7 (2H), 34.8, 31.4 ppm.

### Mass Data:

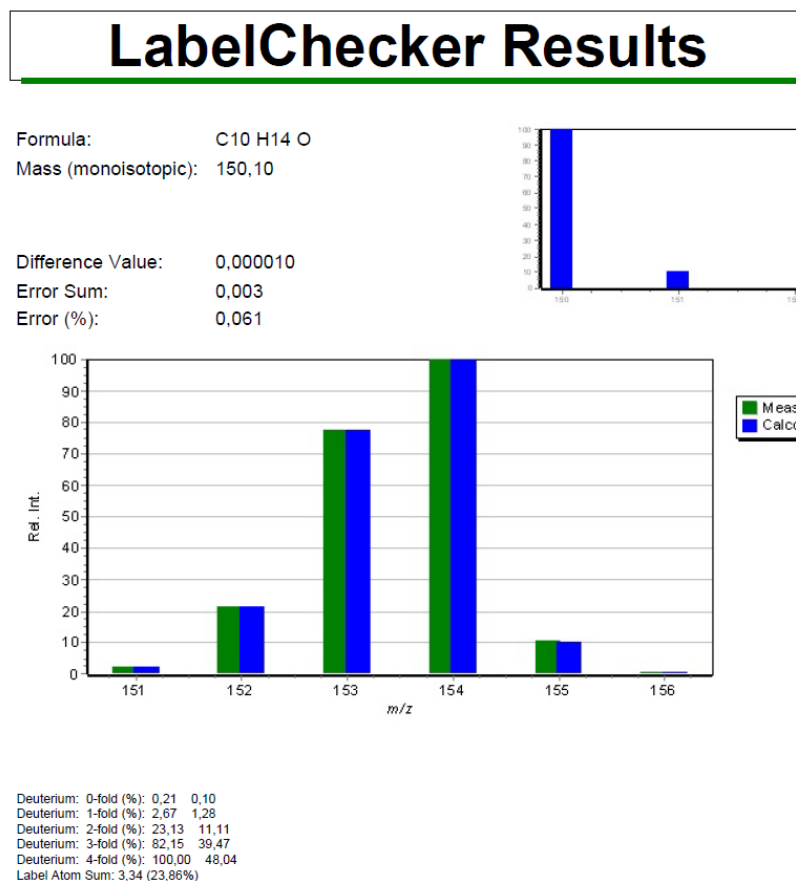



### <sup>13</sup>C-NMR spectrum in CDCl<sub>3</sub>:



### <sup>13</sup>C-NMR spectrum in CDCl<sub>3</sub>:

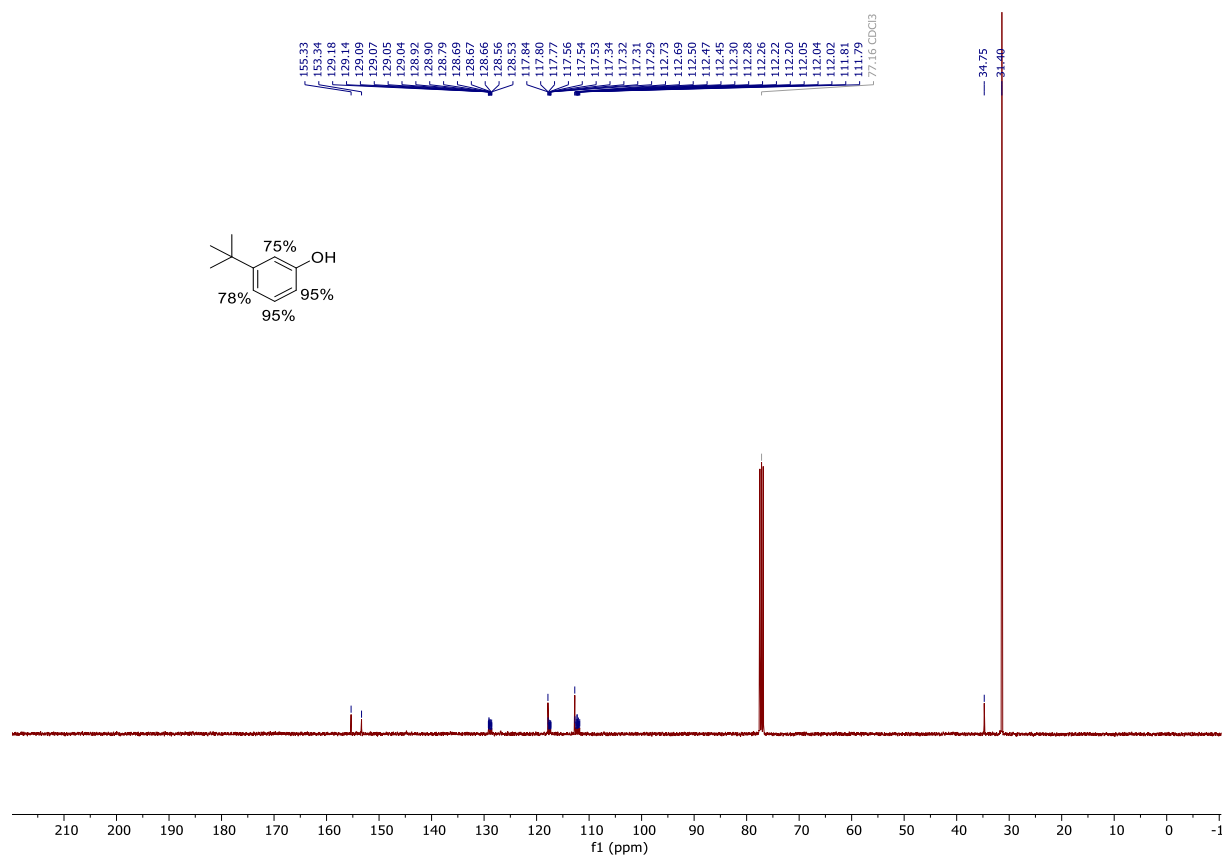

## Deuteration of 3-methylbenzoic acid (**13**):

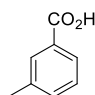

Following the general procedure F and using 3-methylbenzoic acid (**13**) (27.2 mg, 0.200 mmol) and purification by silica gel column chromatography using Pentane:EtOAc = 90:10 as the eluent, the target compound [**D**]**13** was obtained as colorless solid (21 mg, 76%). The degree of deuteration was determined by HRMS studies.

**Deuterium Incorporation:** 2.91 D/molecule [HRMS]; 2.95 D/molecule [<sup>1</sup>H-NMR].

### NMR Data of Starting Material:

<sup>1</sup>H NMR (600 MHz, CDCl<sub>3</sub>) δ = 7.95-7.91 (m, 2H), 7.43 (d, *J* = 7.5 Hz, 1H), 7.37 (t, *J* = 7.6 Hz, 1H), 2.43 (s, 3H) ppm.

<sup>13</sup>C NMR (151 MHz, CDCl<sub>3</sub>) δ = 172.5, 138.5, 134.7, 130.9, 129.4, 128.5, 127.5, 21.4 ppm.

### NMR Data of Product:

<sup>1</sup>H NMR (600 MHz, CDCl<sub>3</sub>) δ = 7.94 (d, *J* = 0.8 Hz, 0.55H, 45% D) 7.93 (s, 0.15H, 85% D) 7.43 (s, 0.3H, 70% D), 7.38-7.35 (0.06H, 94% D), 2.43-2.42 (m, 3H) ppm.

<sup>13</sup>C NMR (151 MHz, CDCl<sub>3</sub>) δ = 172.4, 138.4-138.3(1C), 134.6, 130.8, 129.4-129.2(1C), 128.4-128.1(1C), 127.5-127.3(1C), 21.4-21.3(1C) ppm.

### Mass Data:

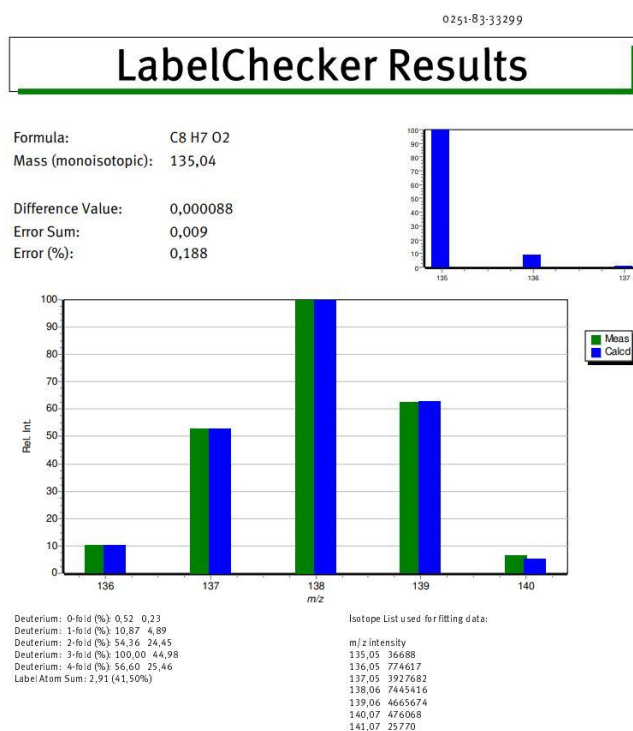

**<sup>1</sup>H-NMR spectrum in CDCl<sub>3</sub>:**

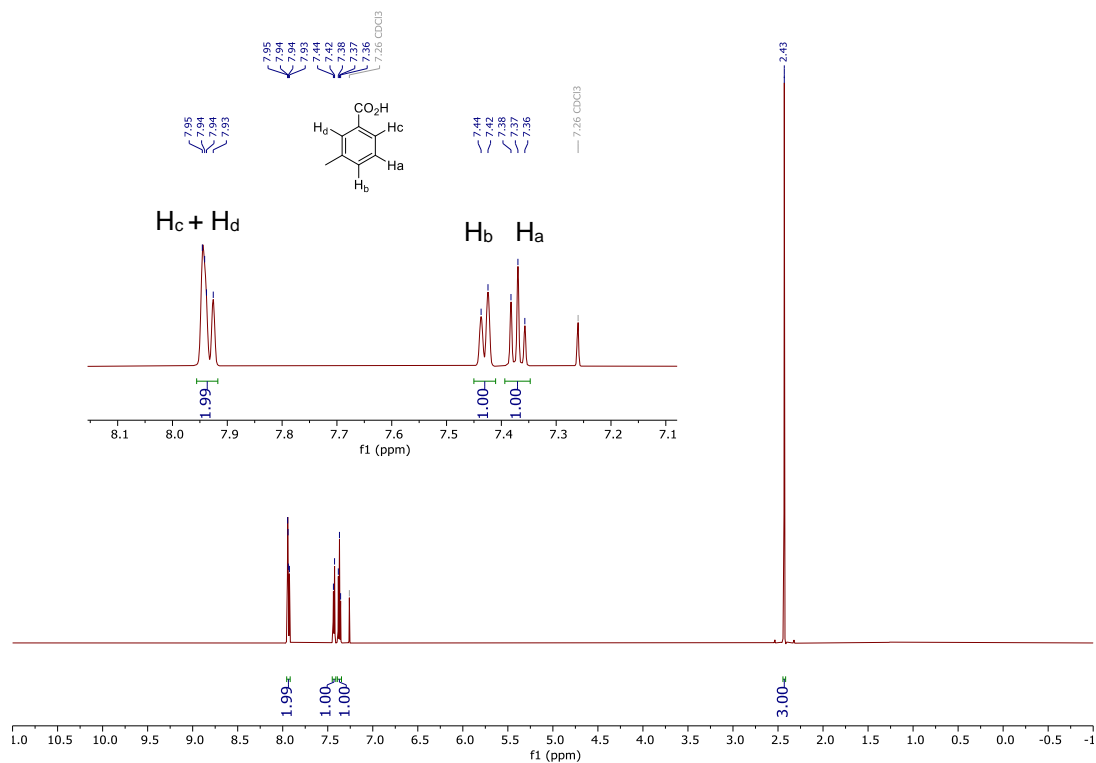

**<sup>1</sup>H-NMR spectrum in CDCl<sub>3</sub>:**

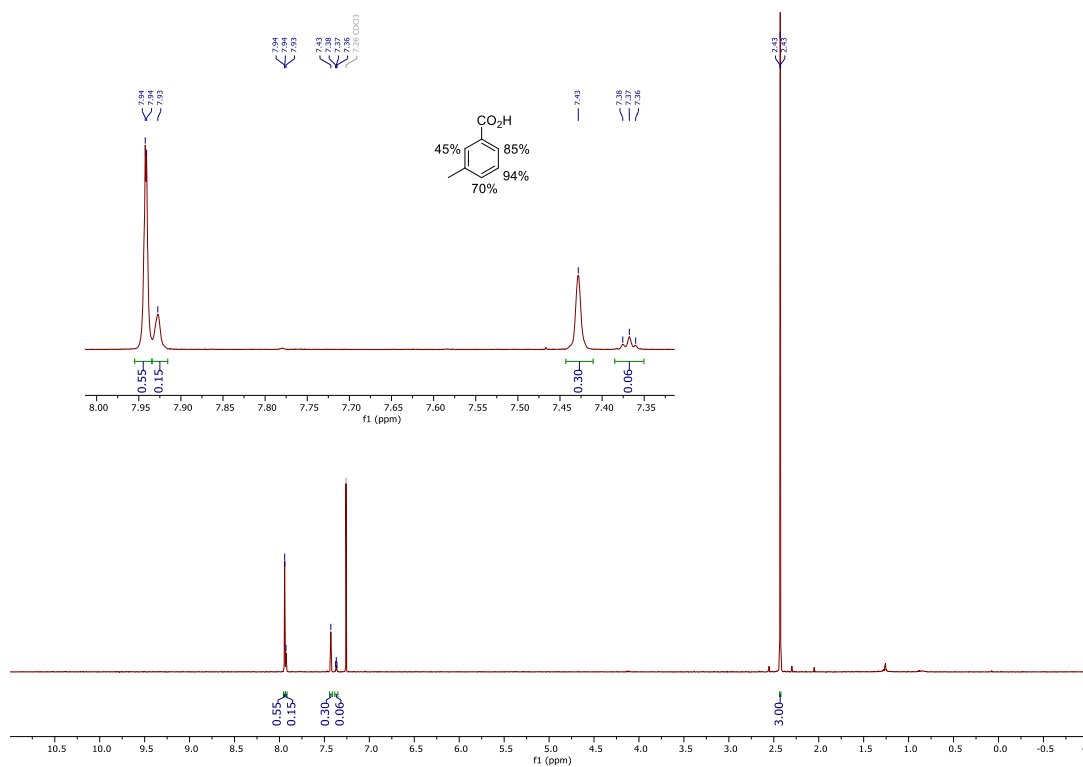



## Deuteration of 5,6,7,8-tetrahydronaphthalen-1-amine (**14**) using Conditions A:

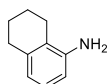

Following the general procedure E, using 5,6,7,8-tetrahydronaphthalen-1-amine (**14**) (29.4 mg, 0.200 mmol), and purification via silica gel column chromatography using pentane:EtOAc = 19:1 as the eluent the target compound [**D**]**14** was obtained as red liquid (18.1 mg, 61%). The degree of deuteration was determined by mass spectrometry.

**Deuterium Incorporation:** 1.80 D/molecule [Mass]; 1.99 D/molecule [<sup>1</sup>H-NMR].

### NMR Data of Starting Material:

<sup>1</sup>H NMR (599 MHz, CDCl<sub>3</sub>) δ = 6.96 (t, *J* = 7.7 Hz, 1H), 6.63-6.59 (m, 2H), 4.45 (br s, NH<sub>2</sub>), 2.74 (t, *J* = 6.3 Hz, 2H), 2.51 (t, *J* = 6.5 Hz, 2H), 1.90-1.84 (m, 2H), 1.79-1.74 (m, 2H) ppm.

<sup>13</sup>C NMR (151 MHz, CDCl<sub>3</sub>) δ = 143.0, 138.4, 126.1, 122.8, 120.7, 113.1, 30.1, 24.3, 23.2, 22.9 ppm.

### NMR Data of Product:

<sup>1</sup>H NMR (400 MHz, CDCl<sub>3</sub>) δ = 6.95 (s, 0.91H, 9% D), 6.57 (t, *J* = 7.5 Hz, 0.10H, >90% D), 3.80 (br s, NH<sub>2</sub>), 2.75 (t, *J* = 6.2 Hz, 2H), 2.49 (t, *J* = 6.4 Hz, 2H), 1.93-1.82 (m, 2H), 1.82-1.71 (m, 2H) ppm.

<sup>13</sup>C NMR (100 MHz, CDCl<sub>3</sub>) δ = 143.8, 138.2, 126.4-125.4 (1H), 122.2, 120.4-119.2 (1H), 112.9-111.4 (1H), 30.0, 24.2, 23.2, 22.9 ppm.

### Mass Data:

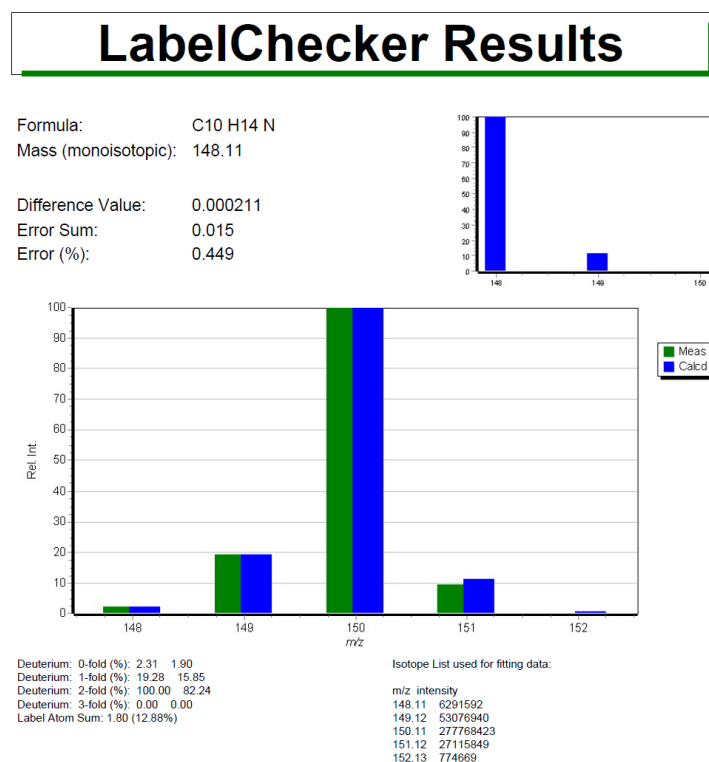



**<sup>1</sup>H-NMR spectrum in CDCl<sub>3</sub>:**

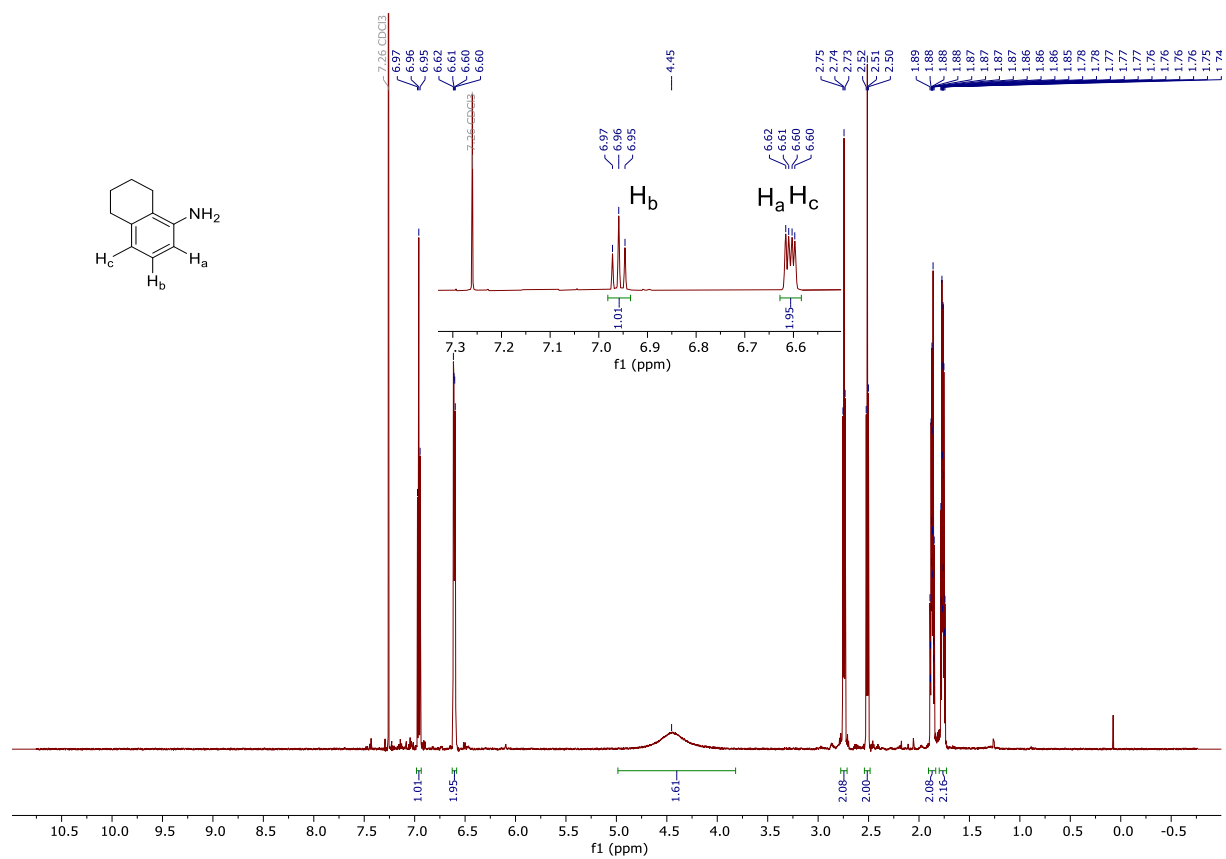

**<sup>1</sup>H-NMR spectrum in CDCl<sub>3</sub>:**

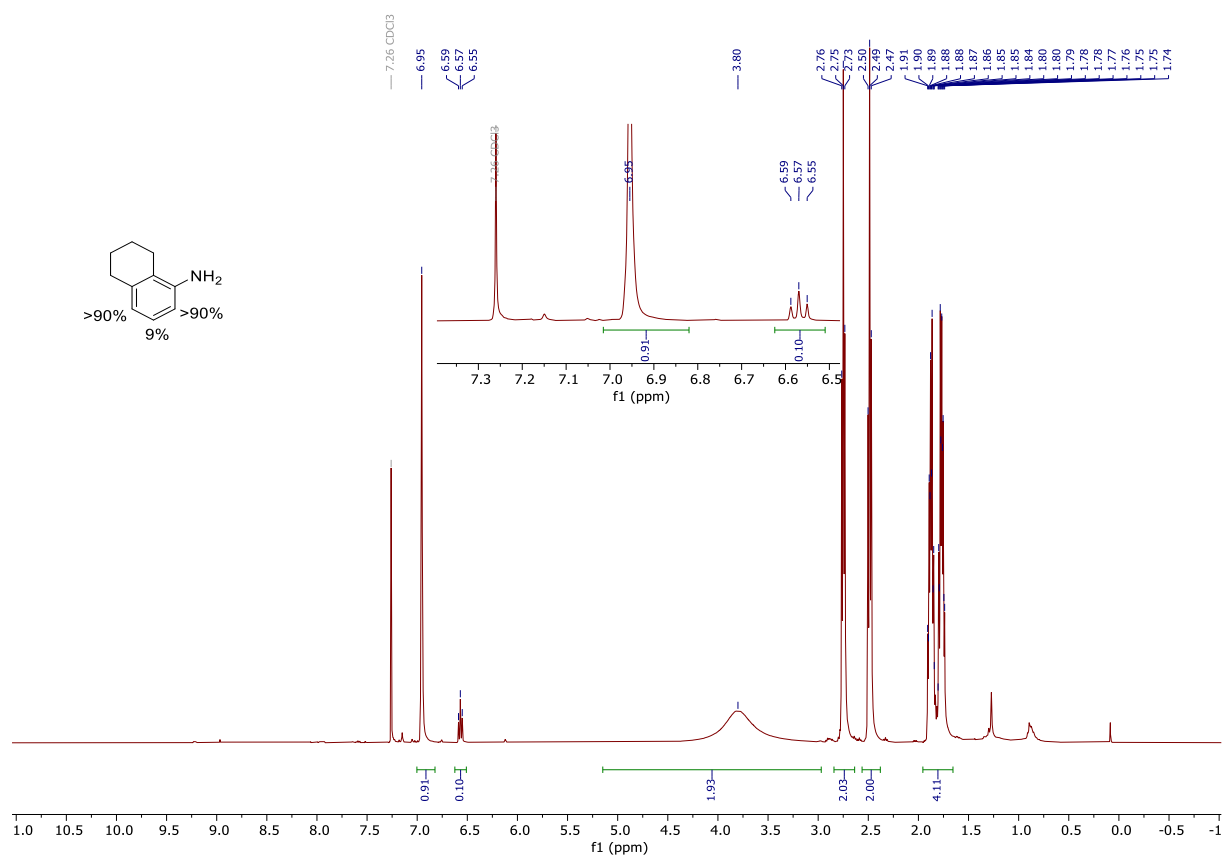

**<sup>13</sup>C-NMR spectrum in CDCl<sub>3</sub>:**

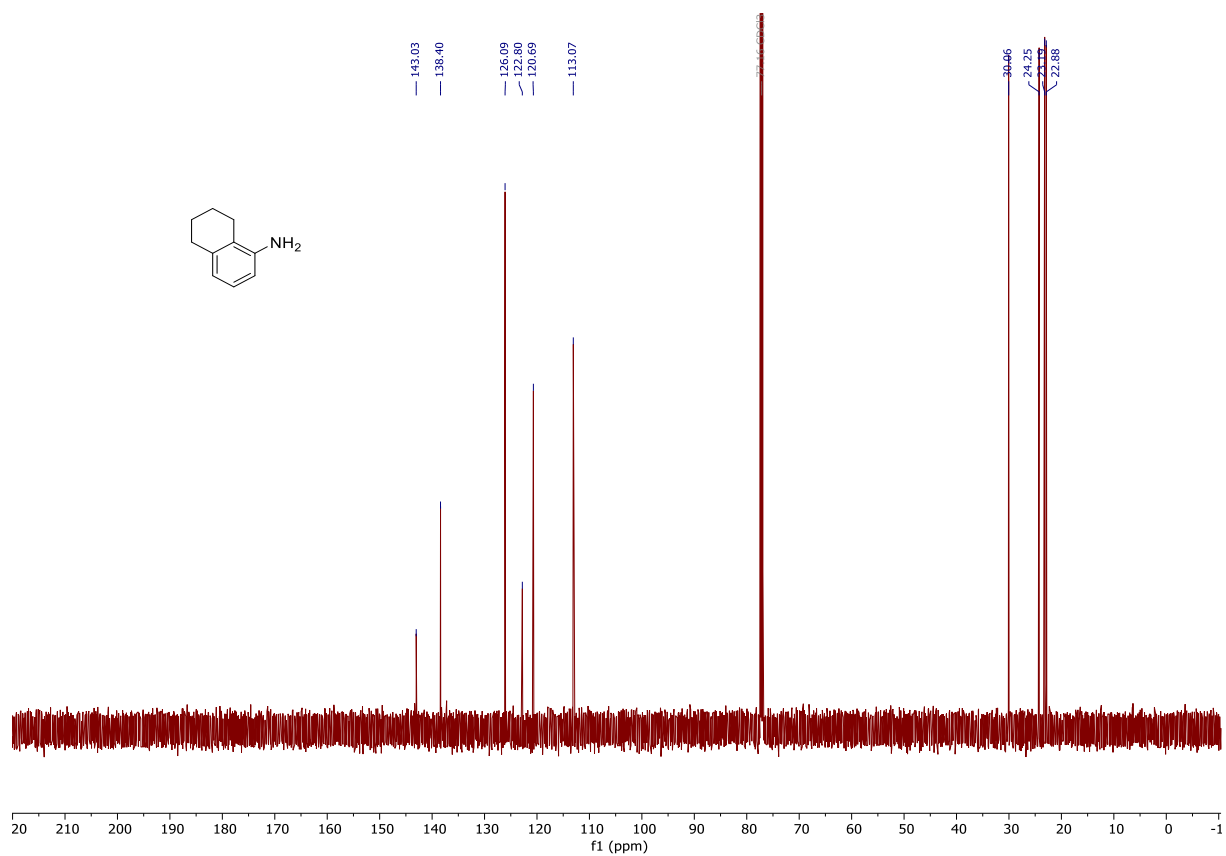

**<sup>13</sup>C-NMR spectrum in CDCl<sub>3</sub>:**

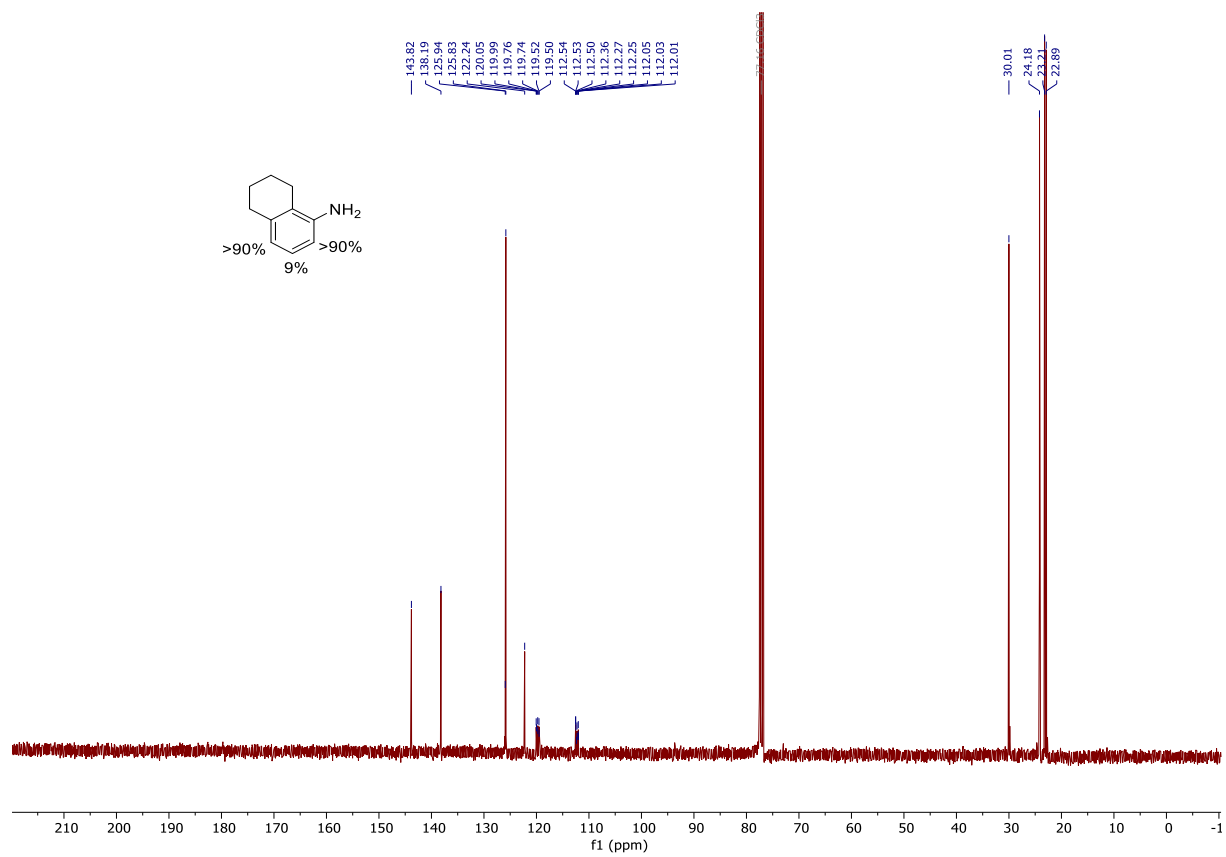

## Deuteration of 5,6,7,8-tetrahydronaphthalen-1-amine (**14**) using Conditions B:

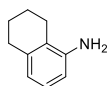

Following the general procedure F, using 5,6,7,8-tetrahydronaphthalen-1-amine (**14**) (29.4 mg, 0.200 mmol), and purification via silica gel column chromatography using pentane:EtOAc = 19:1 as the eluent the target compound [**D**]**14** was obtained as red liquid (16.6 mg, 56%). The degree of deuteration was determined by mass spectrometry.

**Deuterium Incorporation:** 1.98 D/molecule [Mass]; 2.19 D/molecule [<sup>1</sup>H-NMR].

### NMR Data of Starting Material:

<sup>1</sup>H NMR (599 MHz, CDCl<sub>3</sub>) δ = 6.96 (t, *J* = 7.7 Hz, 1H), 6.63-6.59 (m, 2H), 4.45 (br s, NH<sub>2</sub>), 2.74 (t, *J* = 6.3 Hz, 2H), 2.51 (t, *J* = 6.5 Hz, 2H), 1.90-1.84 (m, 2H), 1.79-1.74 (m, 2H) ppm.

<sup>13</sup>C NMR (151 MHz, CDCl<sub>3</sub>) δ = 143.0, 138.4, 126.1, 122.8, 120.7, 113.1, 30.1, 24.3, 23.2, 22.9 ppm.

### NMR Data of Product:

<sup>1</sup>H NMR (400 MHz, CDCl<sub>3</sub>) δ = 6.95 (s, 0.71H, 29% D), 6.57 (t, *J* = 7.3 Hz, 0.10H, >90% D), 3.81 (br s, NH<sub>2</sub>), 2.75 (t, *J* = 6.2 Hz, 2H), 2.49 (t, *J* = 6.5 Hz, 2H), 1.94-1.83 (m, 2H), 1.83-1.70 (m, 2H) ppm.

<sup>13</sup>C NMR (100 MHz, CDCl<sub>3</sub>) δ = 143.8, 138.2, 126.4-125.2 (1H), 122.3, 120.3-119.1 (1H), 113.4-111.4 (1H), 30.0, 24.2, 23.2, 22.9 ppm.

### Mass Data:

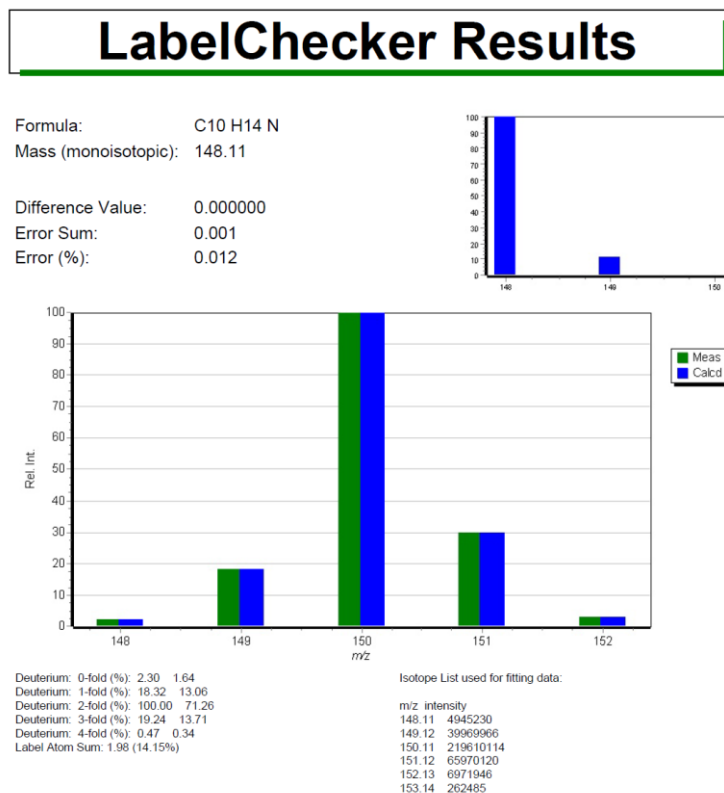

# <sup>1</sup>H-NMR spectrum in CDCl<sub>3</sub>:

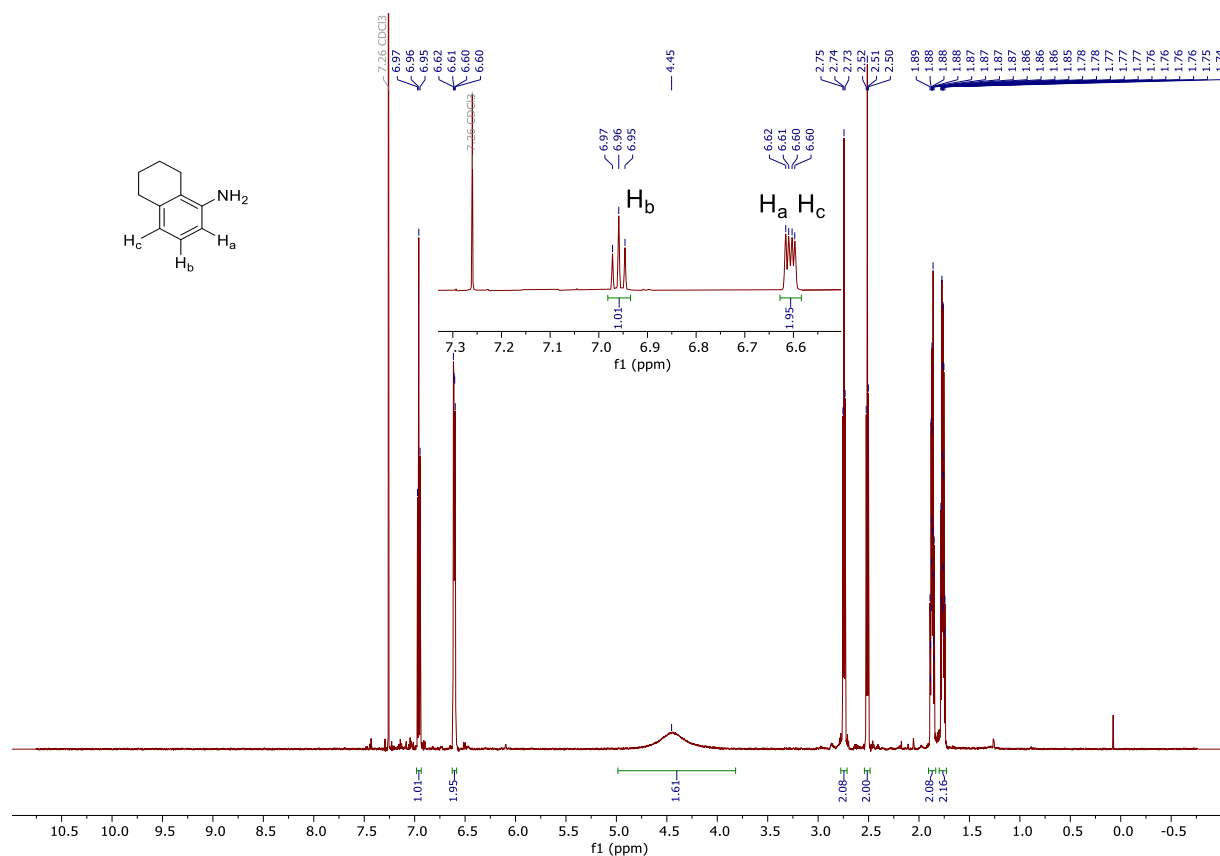

# <sup>1</sup>H-NMR spectrum in CDCl<sub>3</sub>:

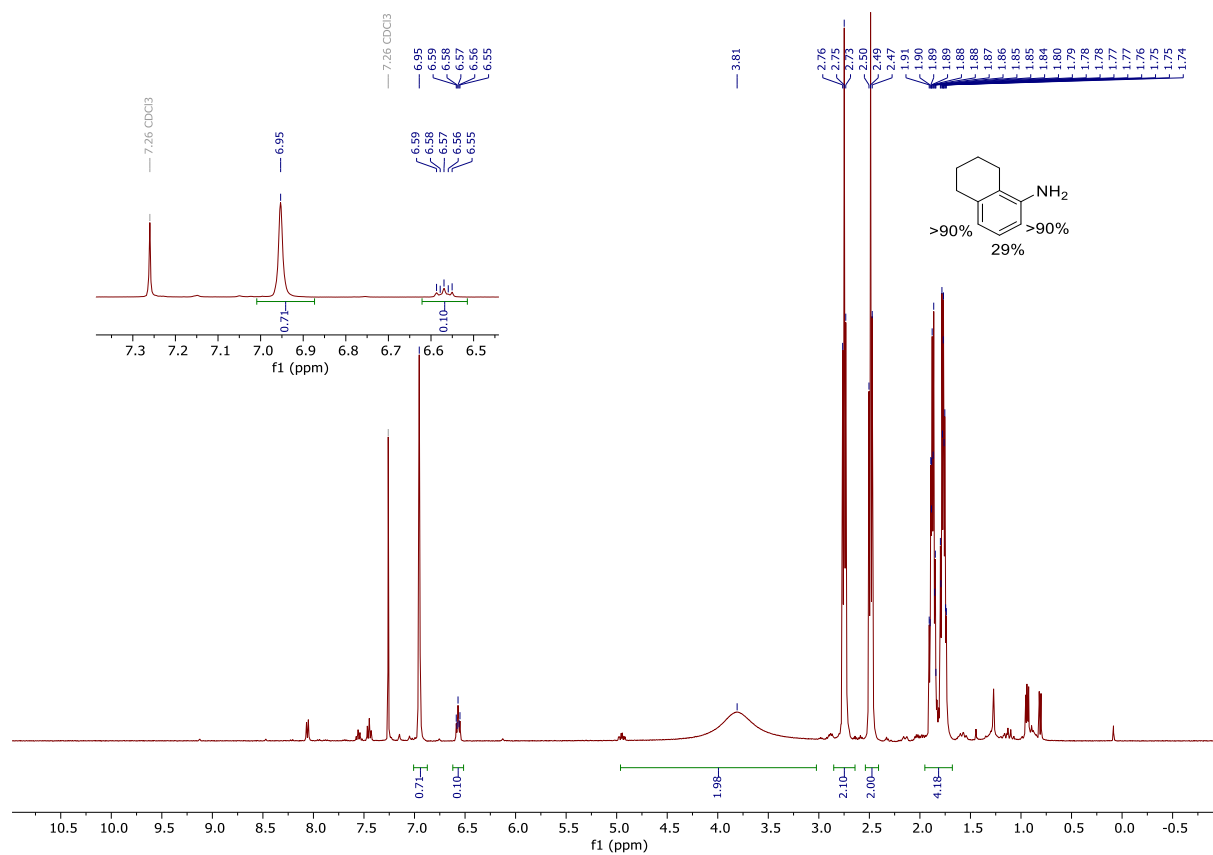

**<sup>13</sup>C-NMR spectrum in CDCl<sub>3</sub>:**

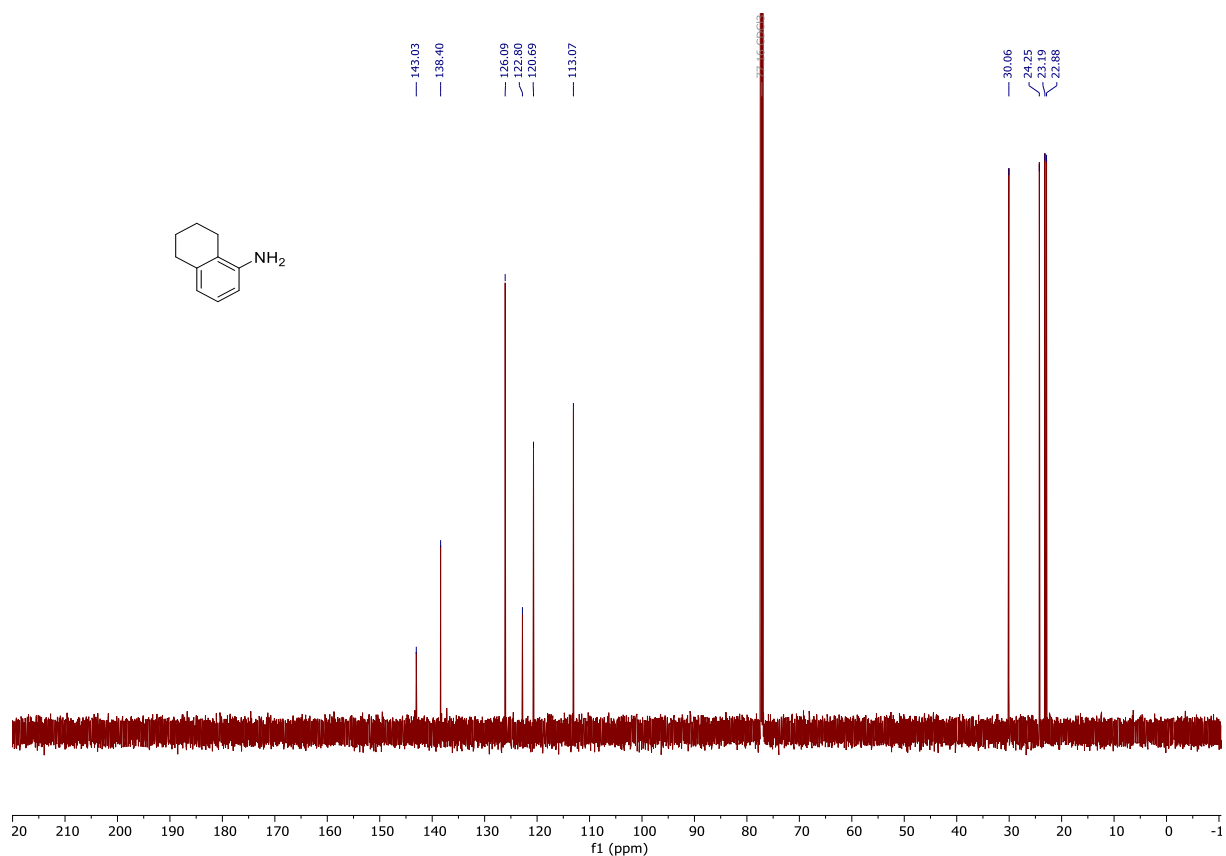

**<sup>13</sup>C-NMR spectrum in CDCl<sub>3</sub>:**

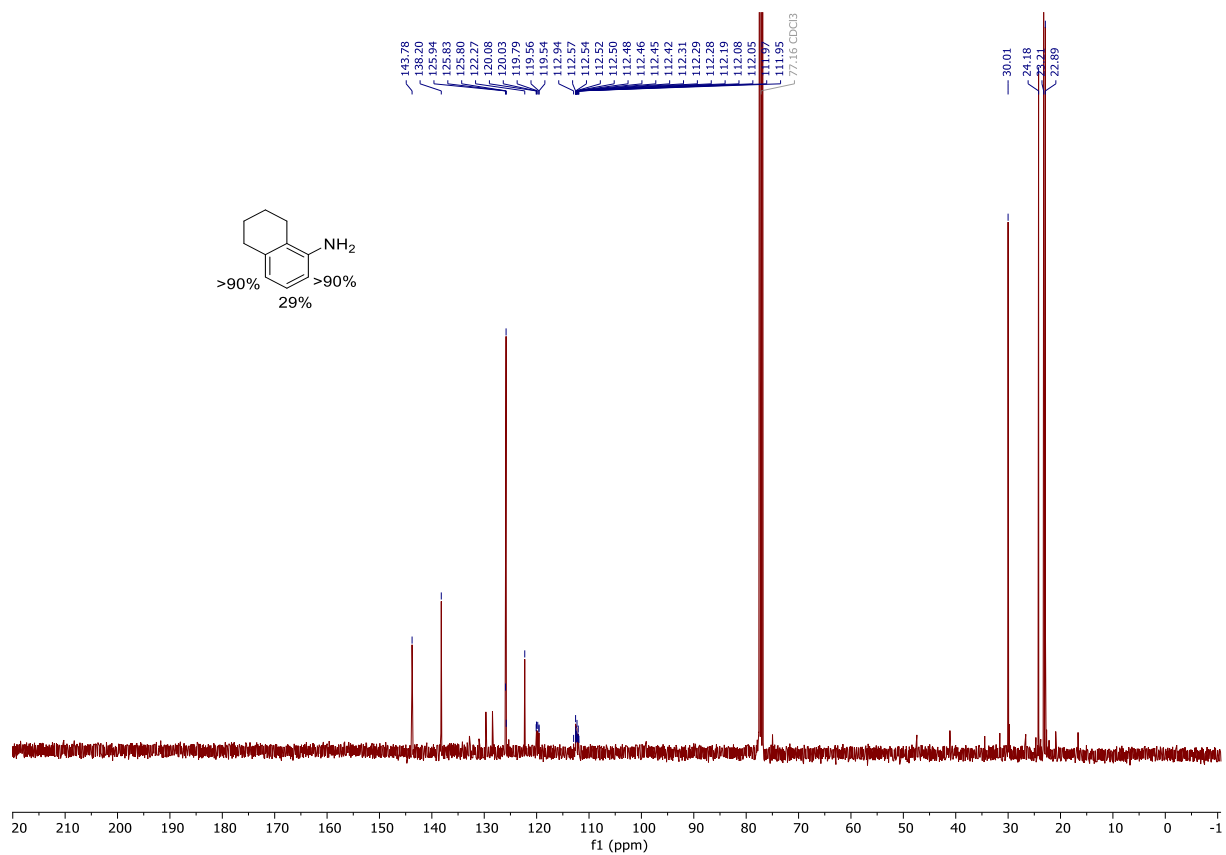

## Deuteration of 1-naphthaldehyde (**15**):

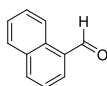

Following the general procedure F, using 1-naphthaldehyde (**15**) (31.2 mg, 0.200 mmol), and purification via silica gel column chromatography using pentane:EtOAc = 19:1 as the eluent the target compound [**D**]**15** was obtained as yellow liquid (18.7 mg, 60%). The degree of deuteration was determined by mass spectrometry.

**Deuterium Incorporation:** 3.95 D/molecule [Mass]; 4.28 D/molecule [<sup>1</sup>H-NMR].

### NMR Data of Starting Material:

<sup>1</sup>H NMR (599 MHz, CDCl<sub>3</sub>) δ = 10.41 (s, 1H), 9.26 (d, J = 8.7 Hz, 1H), 8.11 (d, J = 8.2 Hz, 1H), 8.00 (dd, J = 7.0, 1.3 Hz, 1H), 7.93 (d, J = 8.4 Hz, 1H) 7.70 (ddd, J = 8.5, 6.9, 1.4 Hz, 1H), 7.64 (dd, J = 8.2, 7.0 Hz, 1H), 7.60 (ddd, J = 8.1, 6.9, 1.2 Hz, 1H) ppm.

<sup>13</sup>C NMR (151 MHz, CDCl<sub>3</sub>) δ = 193.7, 136.8, 135.5, 133.9, 131.6, 130.7, 129.2, 128.6, 127.1, 125.0(4), 125.0(3) ppm.

### NMR Data of Product:

<sup>1</sup>H NMR (400 MHz, CDCl<sub>3</sub>) δ = 10.41 (s, 1H), 9.29-9.24 (m, 0.67H, 33% D), 8.14-8.09 (m, 0.42H, 58% D), 8.02-7.98 (m, 0.91H, 9% D), 7.95-7.90 (m, 0.11H, 89%) 7.73-7.67 (m, 0.17H, 83% D), 7.66-7.58 (m, 0.44H, >77% D) ppm.

<sup>13</sup>C NMR (101 MHz, CDCl<sub>3</sub>) δ = 193.7, 136.9-136.5 (1H), 135.5-135.1 (1H), 133.9-133.6 (1H), 131.6, 130.7, 129.3-129.0 (1H), 128.7-128.3 (1H), 127.1-126.7 (1H), 125.1-124.7 (2H) ppm.

### Mass Data:

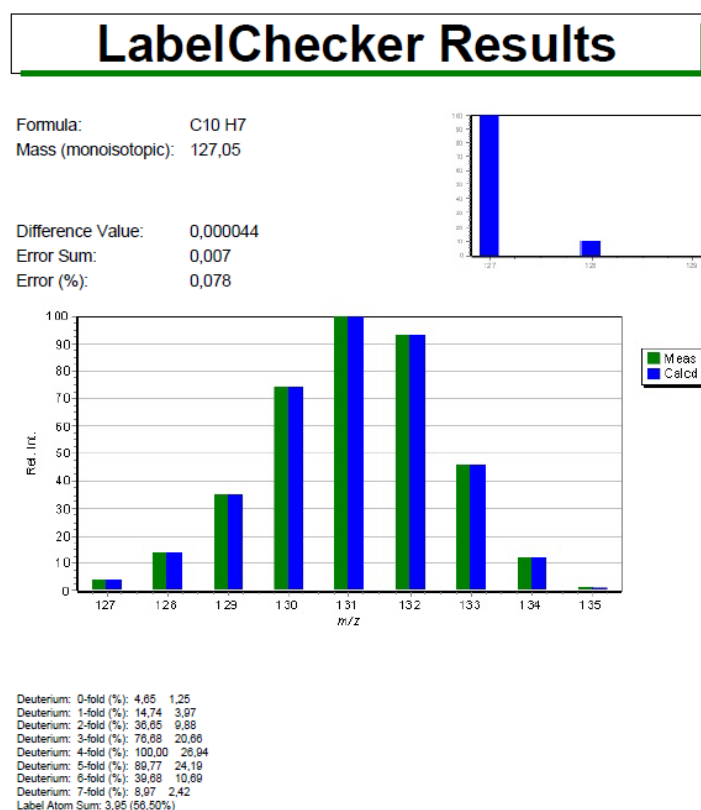

### <sup>1</sup>H-NMR spectrum in CDCl<sub>3</sub>:

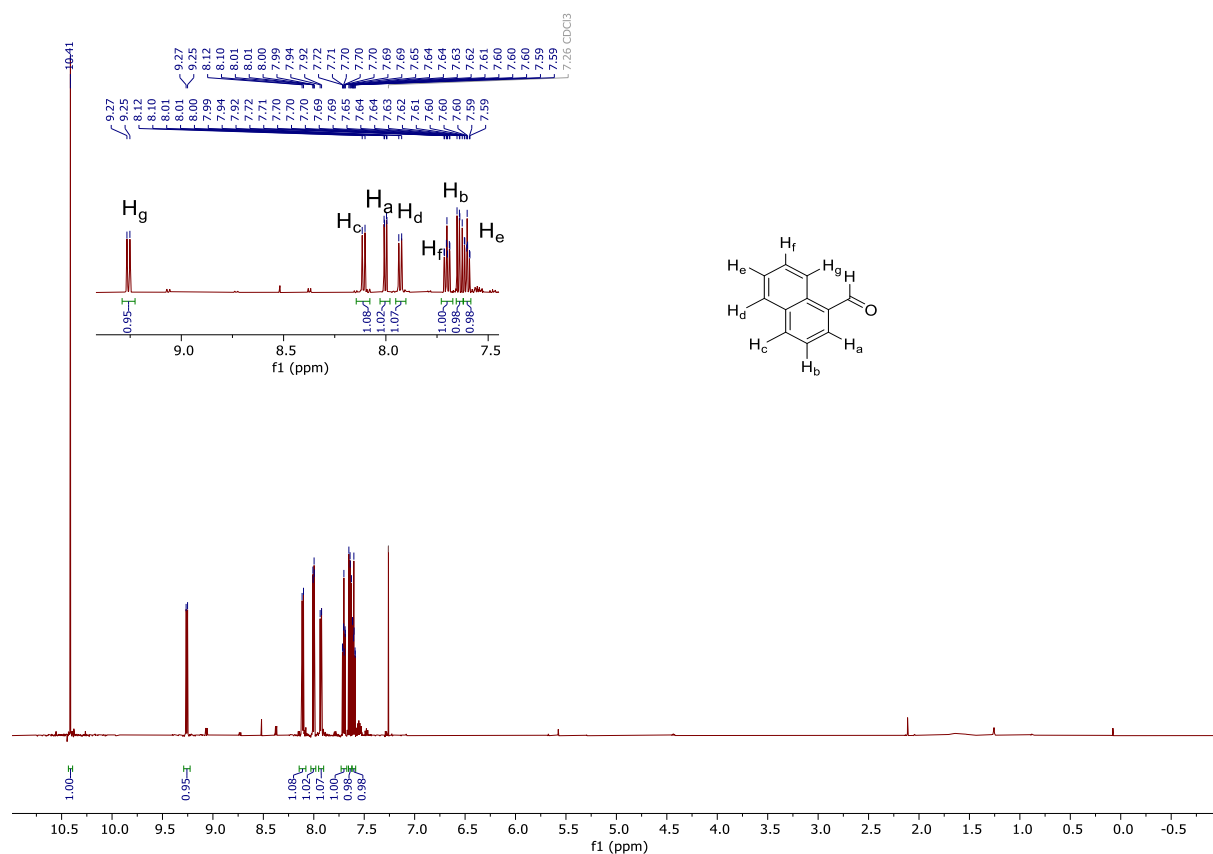

### <sup>1</sup>H-NMR spectrum in CDCl<sub>3</sub>:

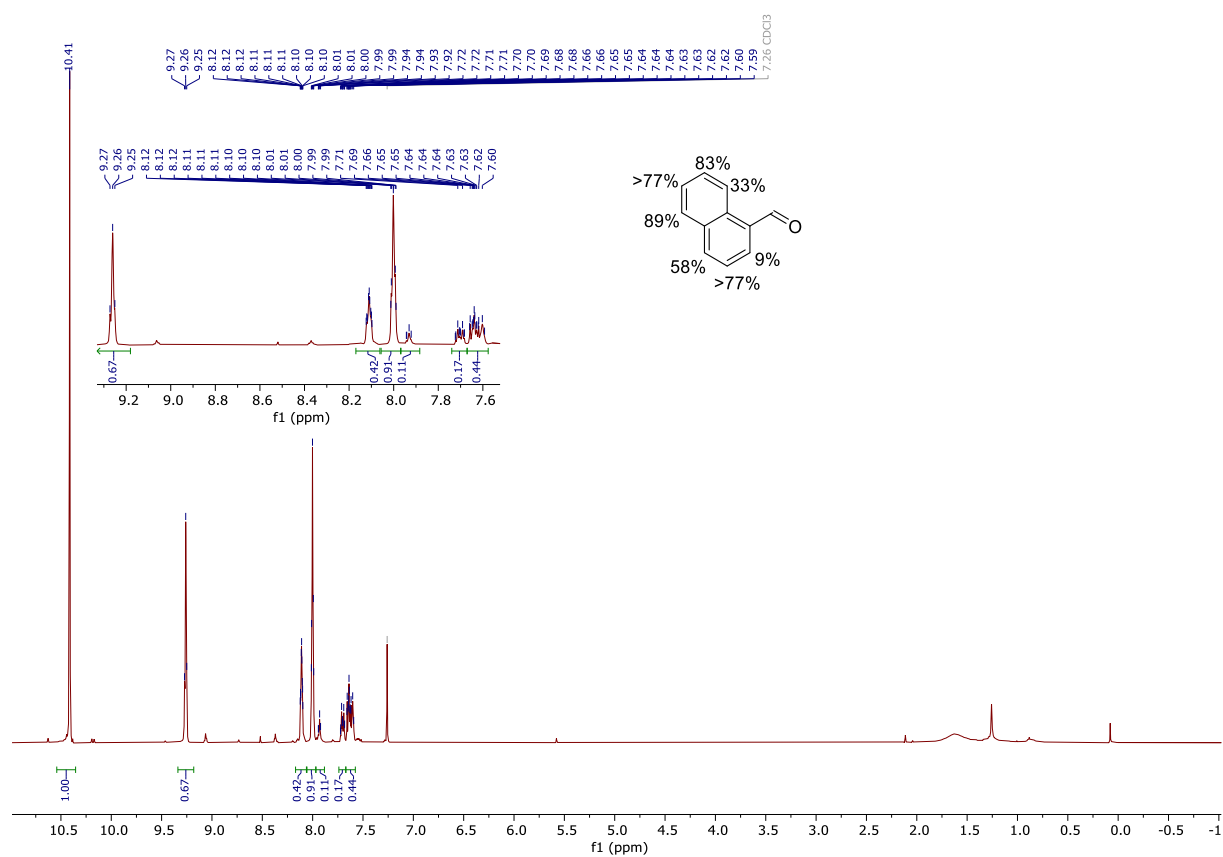

**<sup>13</sup>C-NMR spectrum in CDCl<sub>3</sub>:**

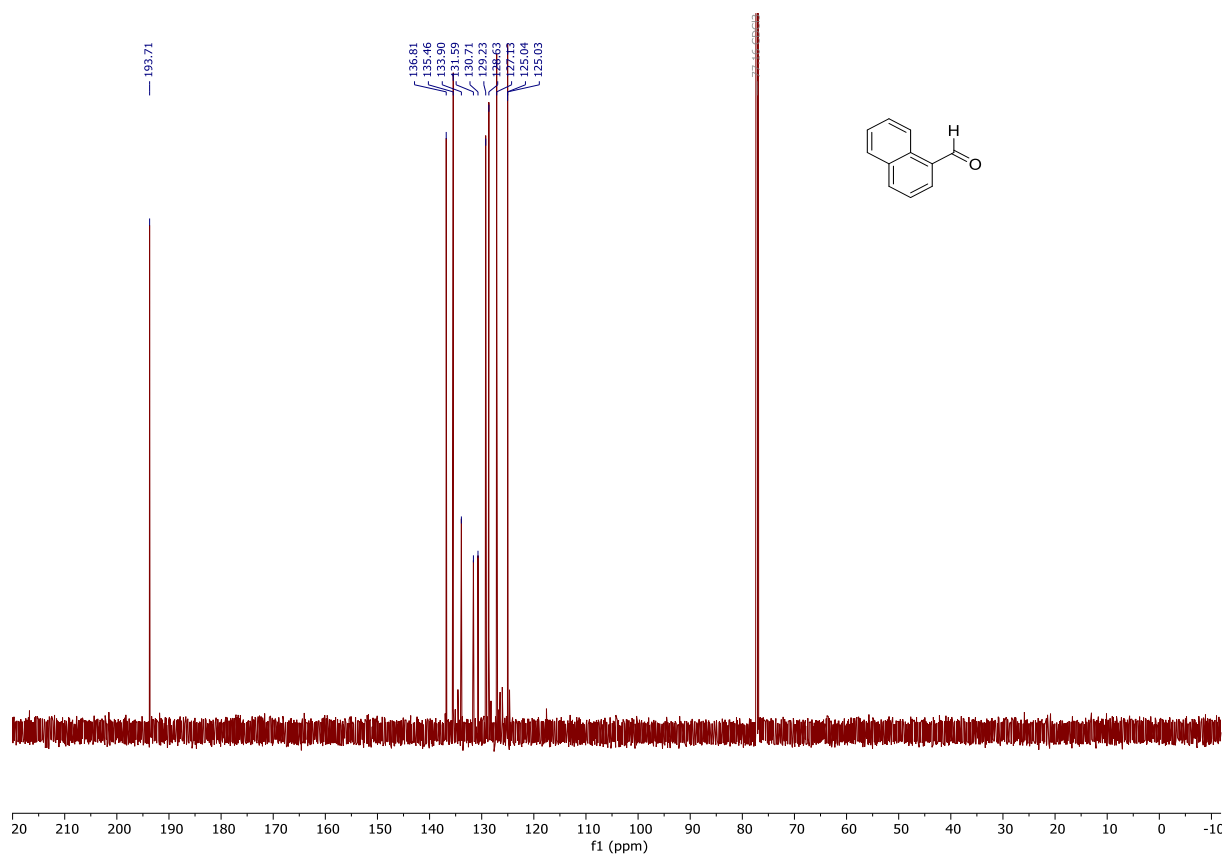

**<sup>13</sup>C-NMR spectrum in CDCl<sub>3</sub>:**

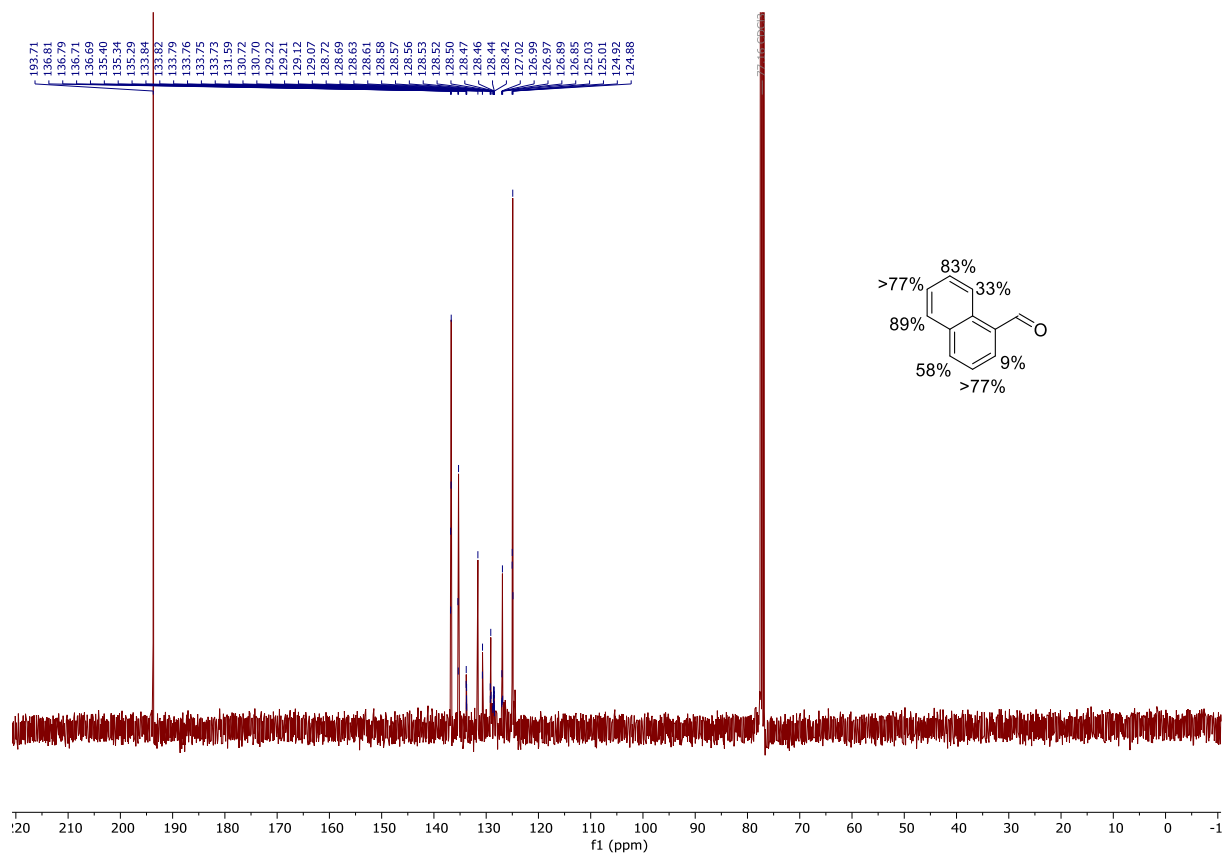



### Deuteration of 3-mesityl-1-methyl-1*H*-pyrrole (**16**):

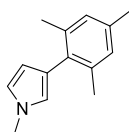

Following the general procedure E and using 3-mesityl-1-methyl-1*H*-pyrrole (**16**) (39.9 mg, 0.200 mmol), and purification via silica gel column chromatography using pentane:EtOAc = 100:1 as the eluent, the target compound [**D**]16 was obtained as a colorless solid (21.2 mg, 53%). The degree of deuteration was determined by NMR-spectroscopy.

**Deuterium Incorporation:** 0.56 D/molecule [<sup>1</sup>H-NMR].<sup>1</sup>

#### NMR Data of Starting Material:

<sup>1</sup>H NMR (400 MHz, CDCl<sub>3</sub>) δ = 6.9 (s, 2H), 6.7 (dd, *J* = 2.5, 2.5 Hz, 1H), 6.4 (dd, *J* = 2.0, 2.0 Hz, 1H), 6.0 (dd, *J* = 2.1, 2.1 Hz, 1H), 3.7 (s, 3H), 2.3 (s, 3H), 2.2 (s, 6H). ppm.

<sup>13</sup>C NMR (151 MHz, CDCl<sub>3</sub>): δ = 137.7, 135.9, 133.8, 128.0, 122.3, 121.3, 120.4, 110.0, 36.3, 21.4, 21.1 ppm.

#### NMR Data of Product:

<sup>1</sup>H NMR (400 MHz, CDCl<sub>3</sub>) δ = 6.93 (s, 2H), 6.65 (s, 0.82H, 18% D), 6.42 (s, 0.78 H, 22% D), 5.99 (s, 0.84H, 16% D), 3.70 (s, 3H), 2.31 (s, 4H), 2.17 (s, 6H). ppm.

<sup>13</sup>C NMR (101 MHz, CDCl<sub>3</sub>) δ = 137.7, 135.9, 133.8, 128.0, 122.2 121.4-121.1 (1C), 120.5-120.3 (1C), 110.1-109.7 (1C), 36.3, 21.4, 21.1 ppm.

---

<sup>1</sup> The degree of deuteration could not be determined through mass spectrometry for this compound, which proved unsuitable for ESI analysis and gave inconclusive deuteration values from the fragments observed after EI ionization.

### <sup>1</sup>H-NMR spectrum in CDCl<sub>3</sub>:

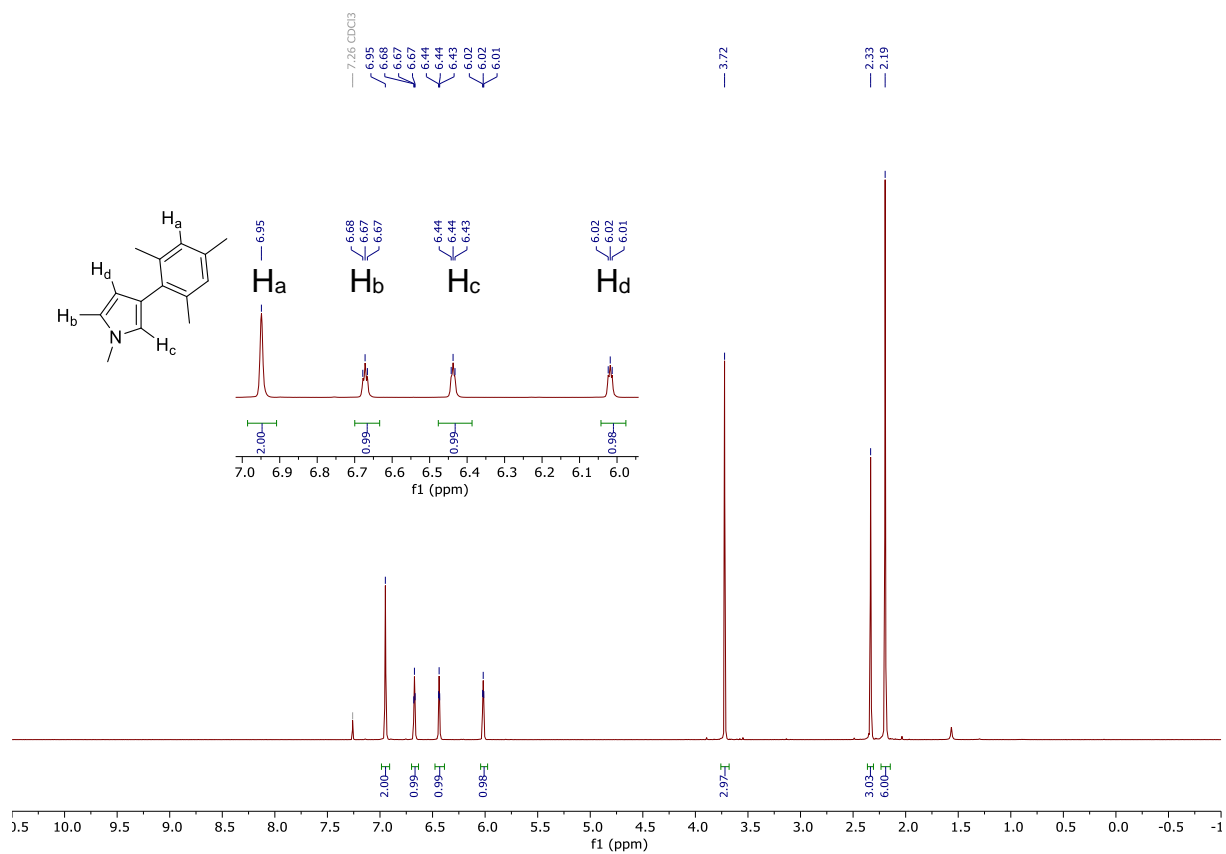

### <sup>1</sup>H-NMR spectrum in CDCl<sub>3</sub>:

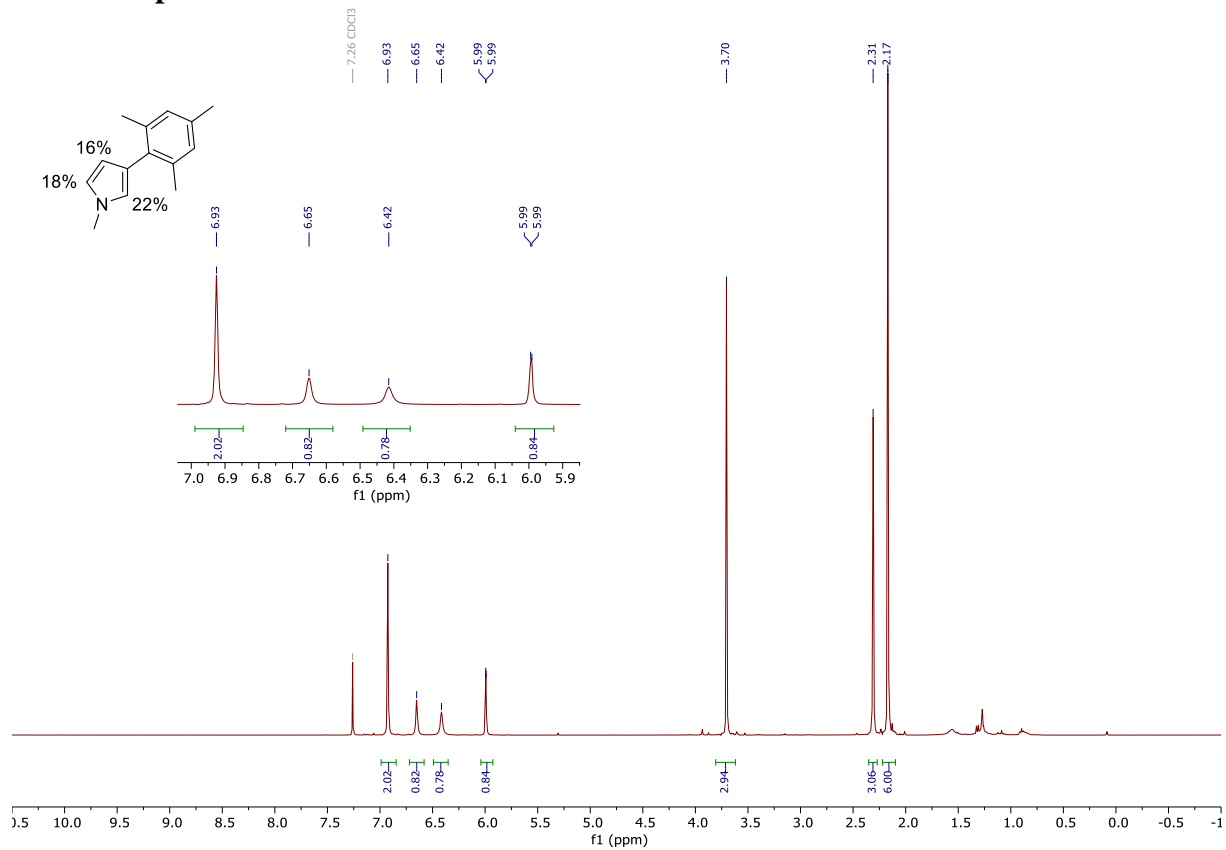

### <sup>13</sup>C-NMR spectrum in CDCl<sub>3</sub>:

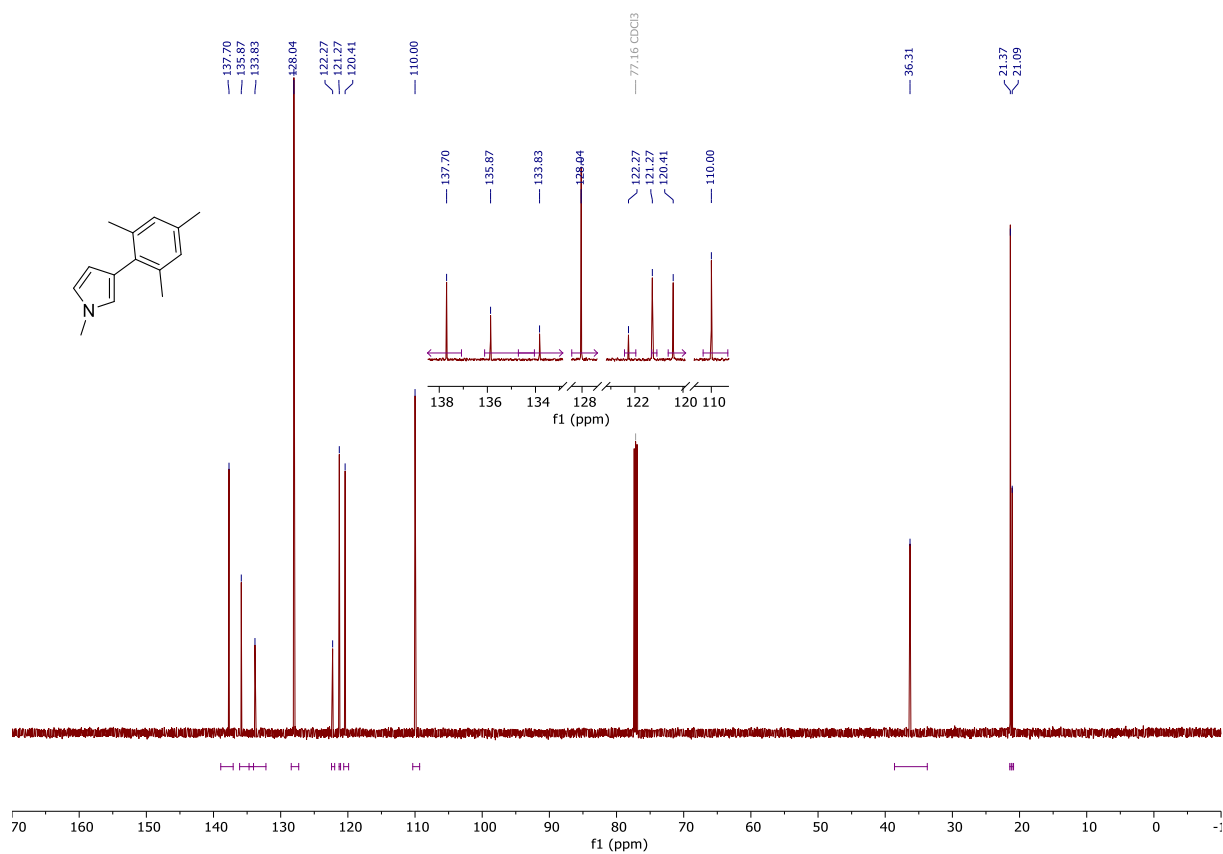

### <sup>13</sup>C-NMR spectrum in CDCl<sub>3</sub>:

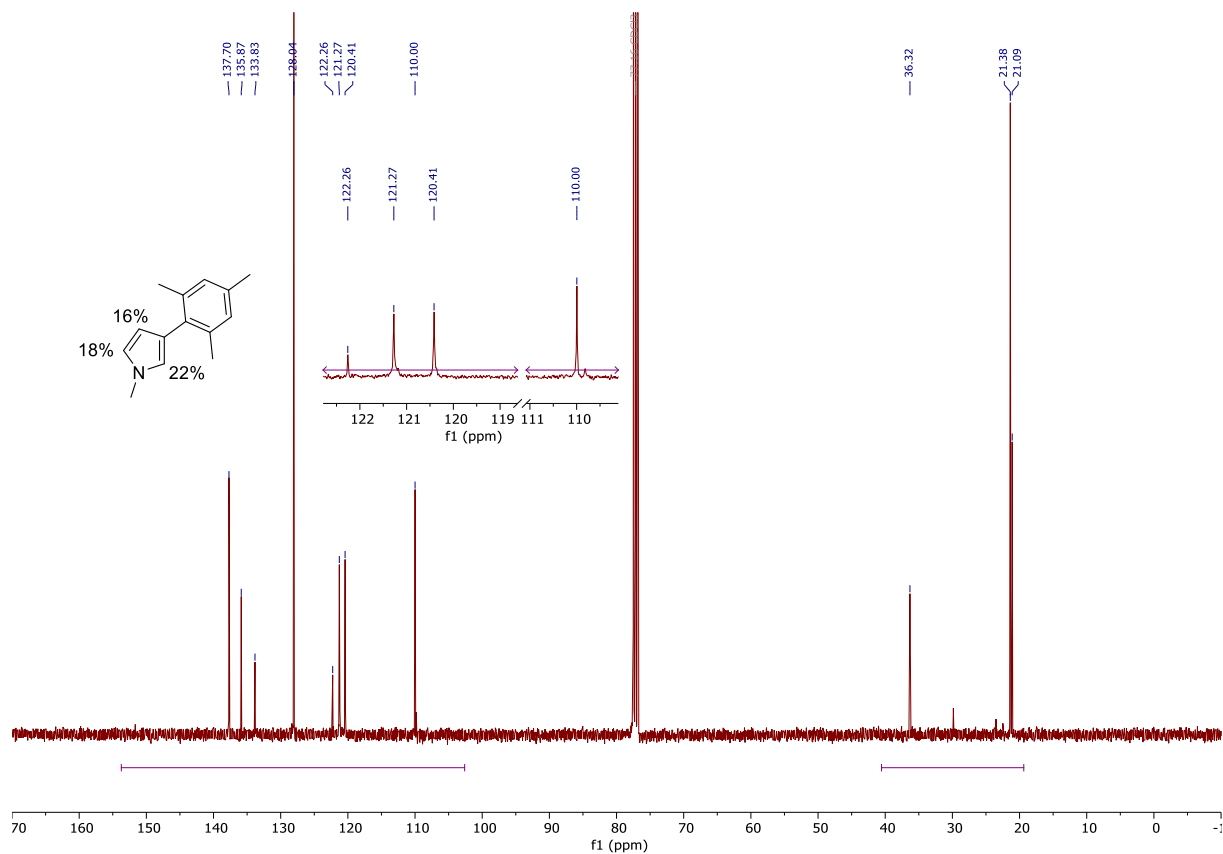

## Deuteration of ethyl oxazole-4-carboxylate (**17**):

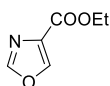

Following the general procedure F and using ethyl oxazole-4-carboxylate (**17**) (28.2 mg, 0.200 mmol), and purification via silica gel column chromatography using pentane:Et<sub>2</sub>O = 20:1 as the eluent, the target compound [**D**]**17** was obtained as colorless liquid (32%)<sup>a</sup>. The degree of deuteration was determined by mass spectrometry.

**Deuterium Incorporation:** 1.18 D/molecule [Mass]; 1.17 D/molecule [<sup>1</sup>H-NMR].

### NMR Data of Starting Material:

<sup>1</sup>H NMR (400 MHz, CDCl<sub>3</sub>) δ = 8.30-8.23 (m, 1H), 7.93 (s, 1H), 4.39 (q, *J* = 7.1 Hz, 2H), 1.38 (t, *J* = 7.1 Hz, 3H). ppm.

<sup>13</sup>C NMR (100 MHz, CDCl<sub>3</sub>) δ = 161.1, 151.5, 144.1, 133.5, 61.5, 14.4 ppm.

### NMR Data of Product:

<sup>1</sup>H NMR (400 MHz, CDCl<sub>3</sub>) δ = 8.27 (s, 0.79H, 21% D), 7.93 (s, 0.04H, 96% D), 4.44-4.36 (m, 2H), 1.39 (t, *J* = 7.1 Hz, 3H) ppm.

<sup>13</sup>C NMR (150 MHz, CDCl<sub>3</sub>) δ = 161.1, 151.0-149.9 (1C), 144.1, 133.5, 61.5, 14.4 ppm.

### Mass Data:

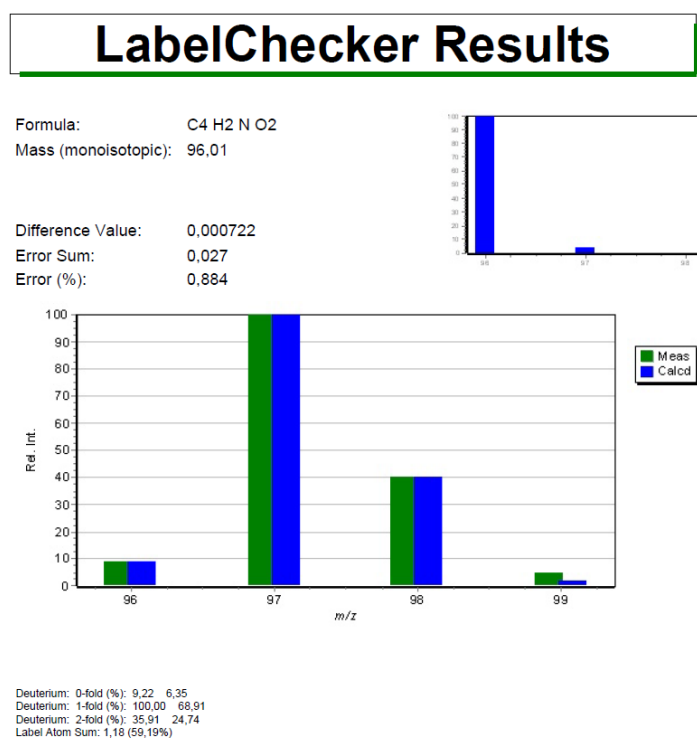

a The isolated product was obtained with an unknown impurity, which could not be separated by column chromatography. Therefore, after isolation, 1,3,5-trimethyl benzene was added as an internal standard and the product yield was calculated. The spectra presented are those after isolation with unknown impurity, but before the addition of the internal standard.

### <sup>1</sup>H-NMR spectrum in CDCl<sub>3</sub>:

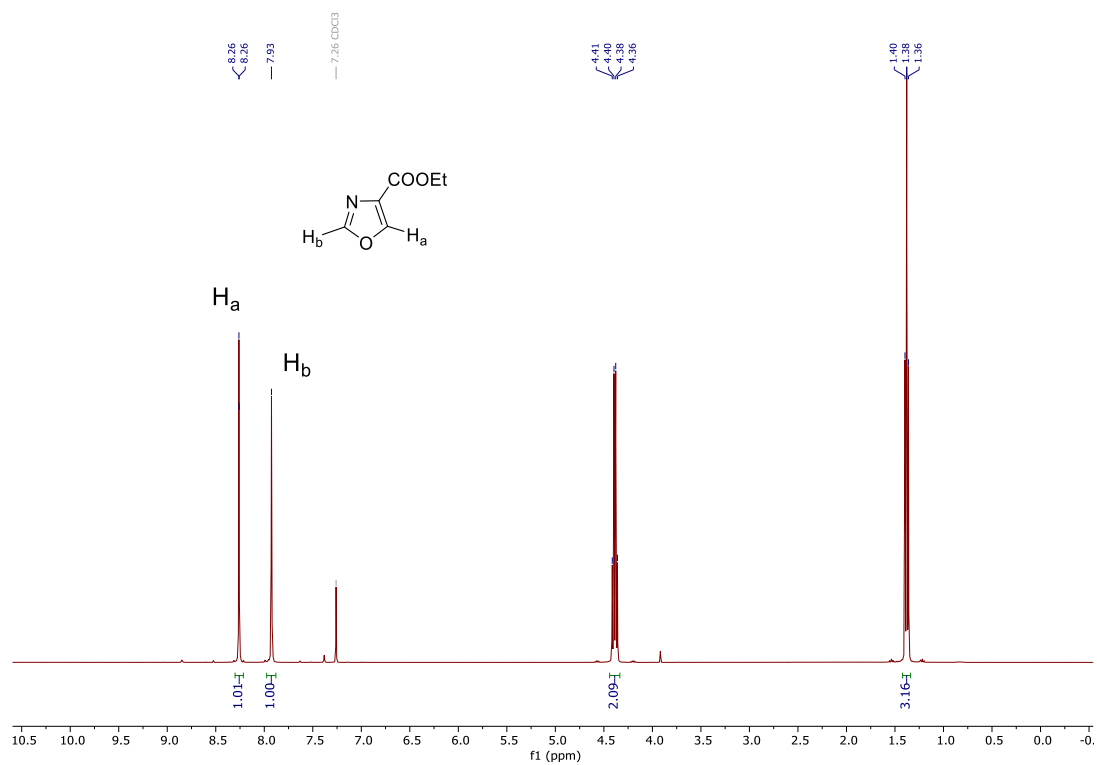

### <sup>1</sup>H-NMR spectrum in CDCl<sub>3</sub>:

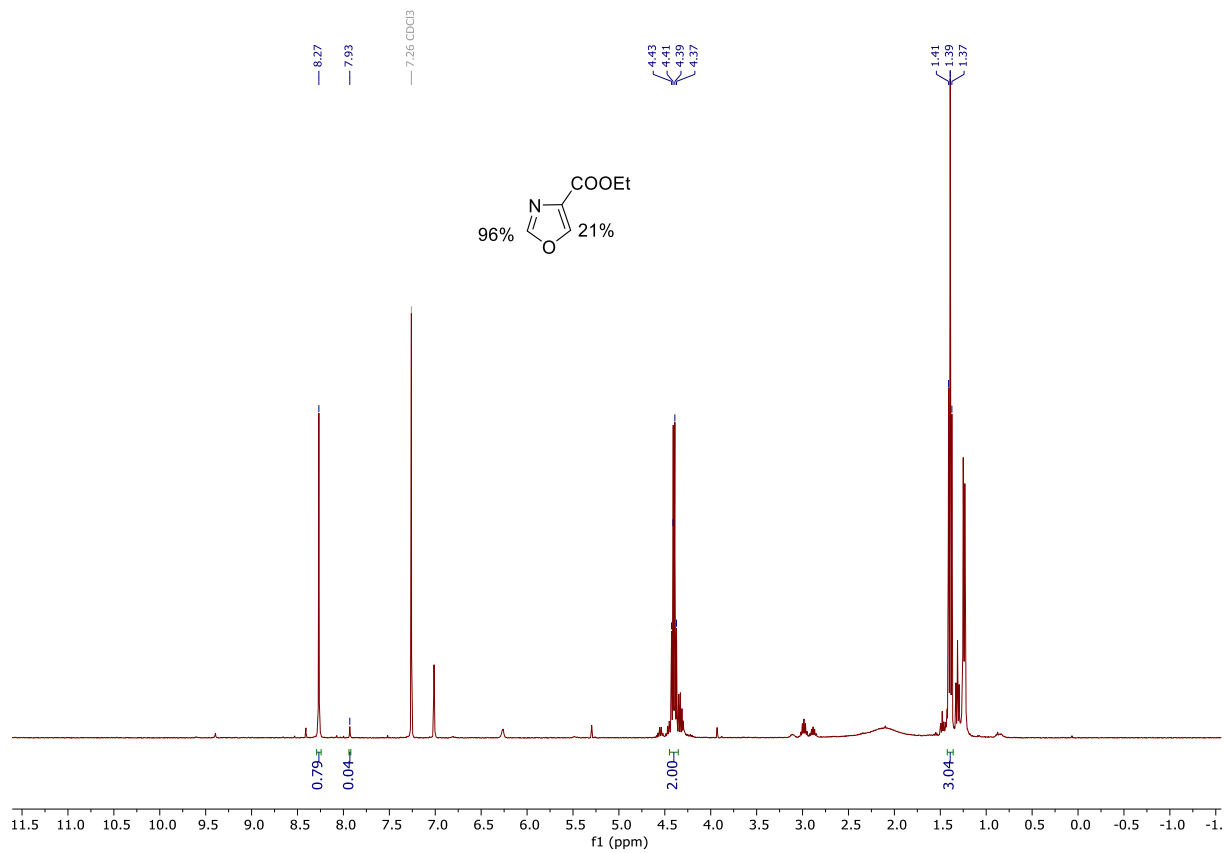

**<sup>13</sup>C-NMR spectrum in CDCl<sub>3</sub>:**

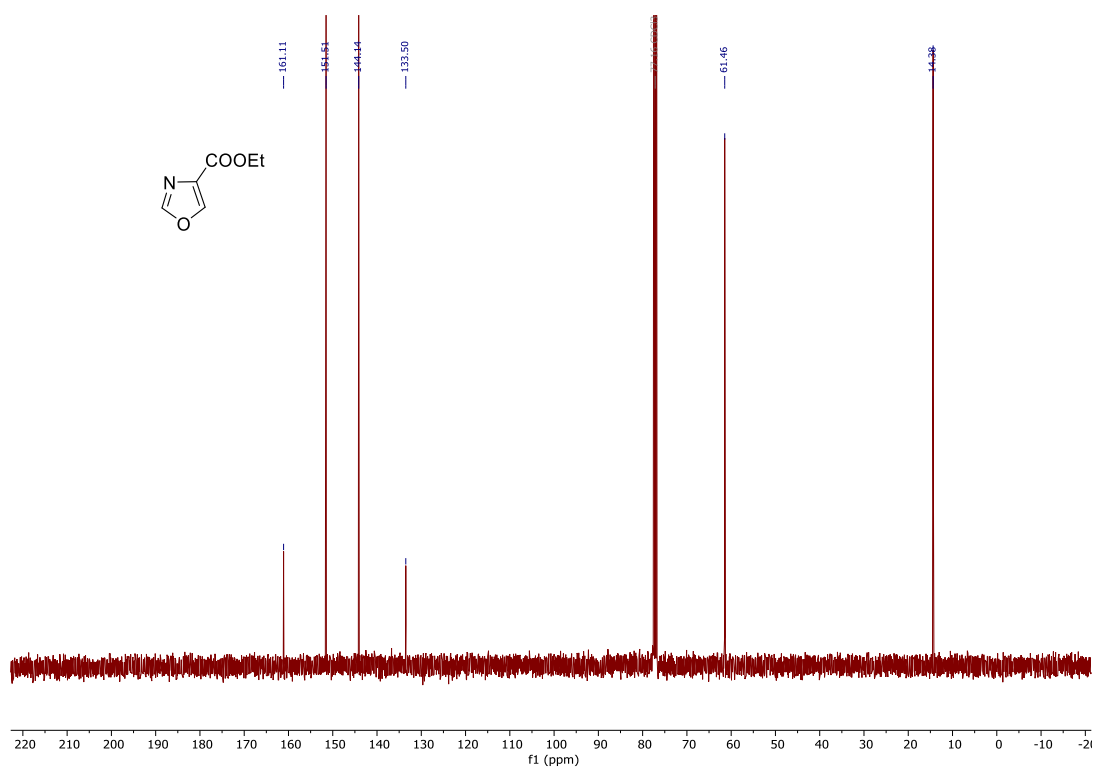

**<sup>13</sup>C-NMR spectrum in CDCl<sub>3</sub>:**

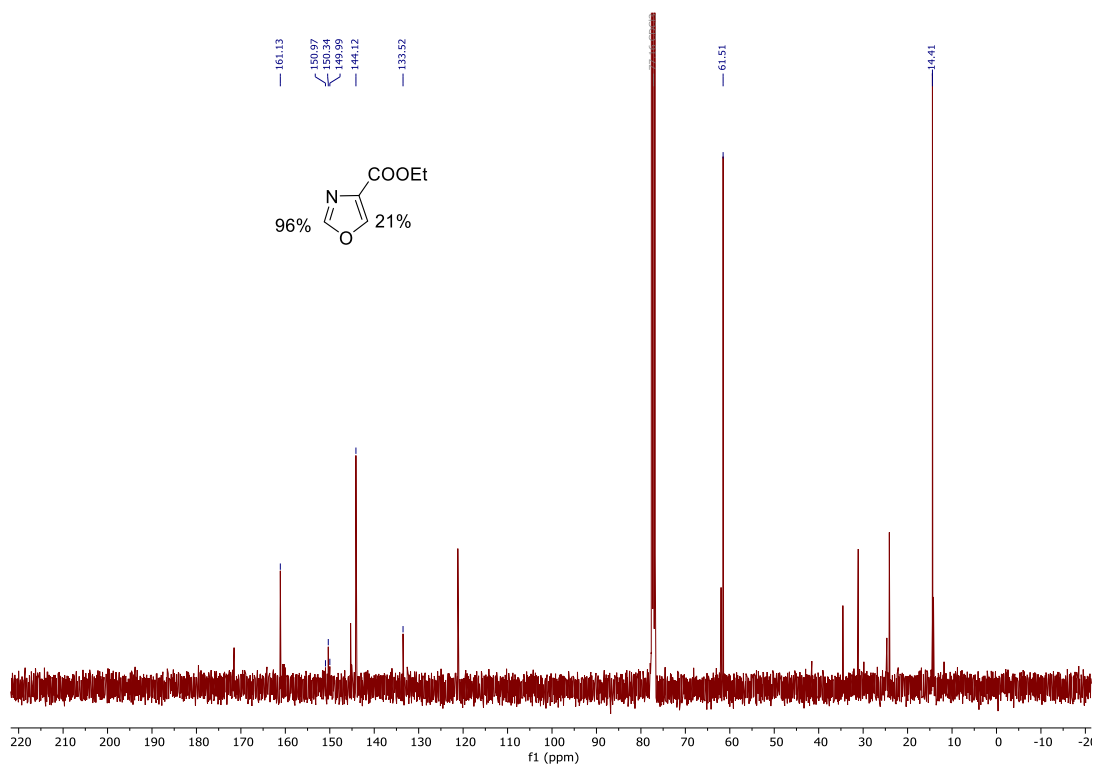

## Deuteration of 2-methoxythiazole (**18**):

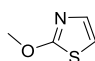

Following the general procedure F and using 2-methoxythiazole (**18**) (23.0 mg, 0.200 mmol), the yield of the target compound [**D**]**18** was determined using crude reaction mixture and 1,3,5-trimethyl benzene as an internal standard (85%)<sup>b</sup>. The degree of deuteration was determined by mass spectrometry.

**Deuterium Incorporation:** 0.46 D/molecule [Mass]; 0.53 D/molecule [<sup>1</sup>H-NMR].

### NMR Data of Starting Material:

<sup>1</sup>H NMR (400 MHz, CDCl<sub>3</sub>) δ = 7.16-7.01 (m, 1H), 6.72-6.55 (m, 1H), 4.08-3.99 (m, 3H) ppm.

### NMR Data of Product in Crude Reaction Mixture:

<sup>1</sup>H NMR (400 MHz, CDCl<sub>3</sub>) δ = 7.12-7.06 (m, 0.96H, 4% D), 6.62-6.57 (m, 0.51H, 49% D), 4.06 (s, 3H) ppm.

### Mass Data:

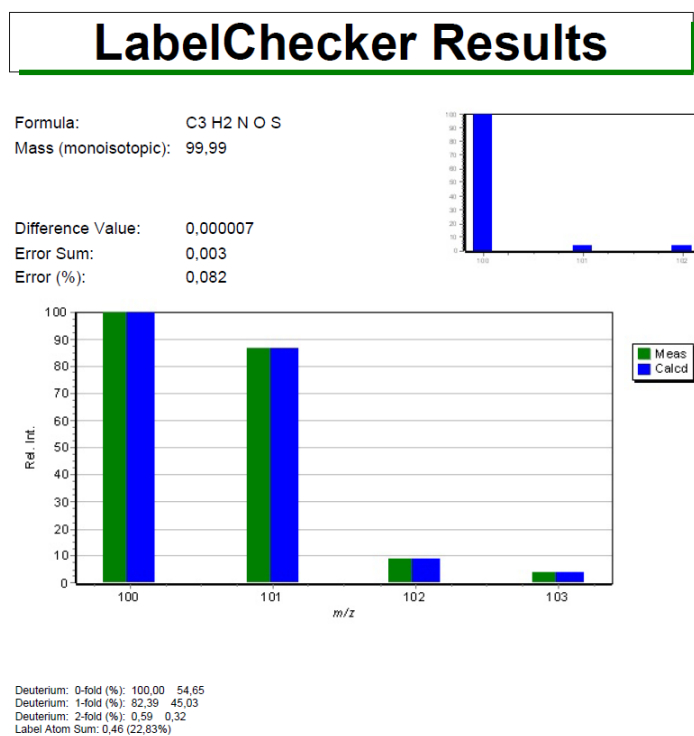

<sup>b</sup> The NMR yield was used in this case due to difficulties in the isolation of this product caused by its volatility.

### <sup>1</sup>H-NMR spectrum in CDCl<sub>3</sub>:

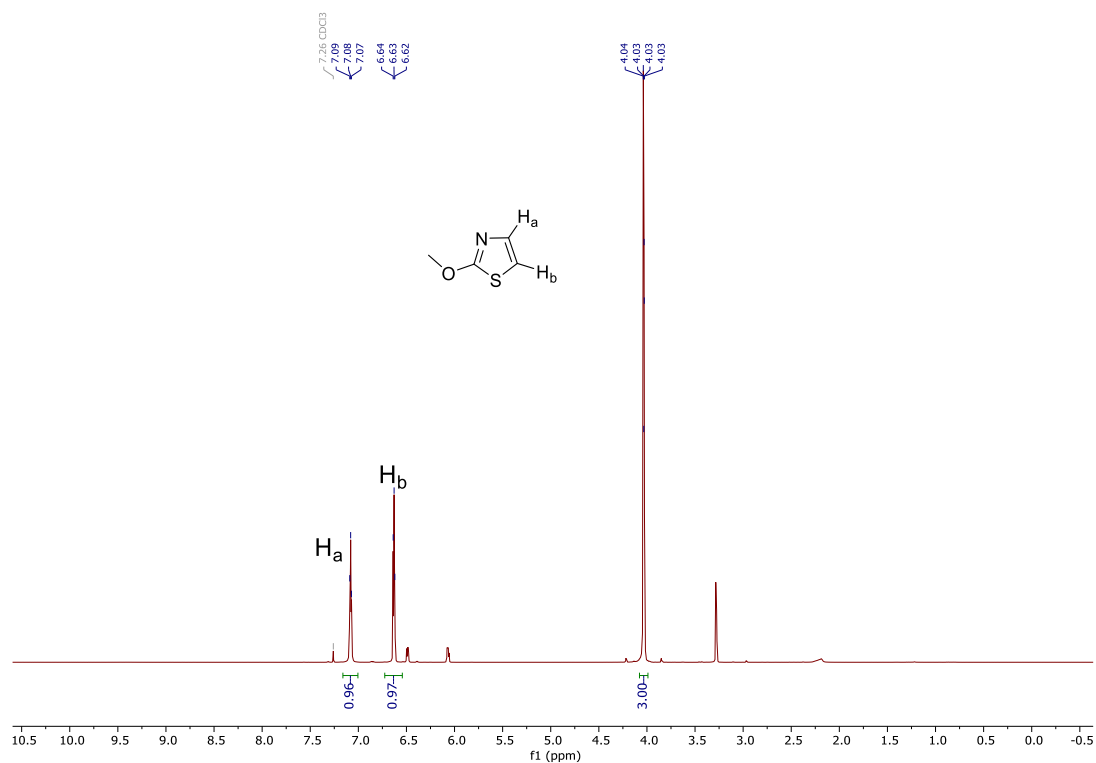

### <sup>1</sup>H-NMR spectrum in CDCl<sub>3</sub>:

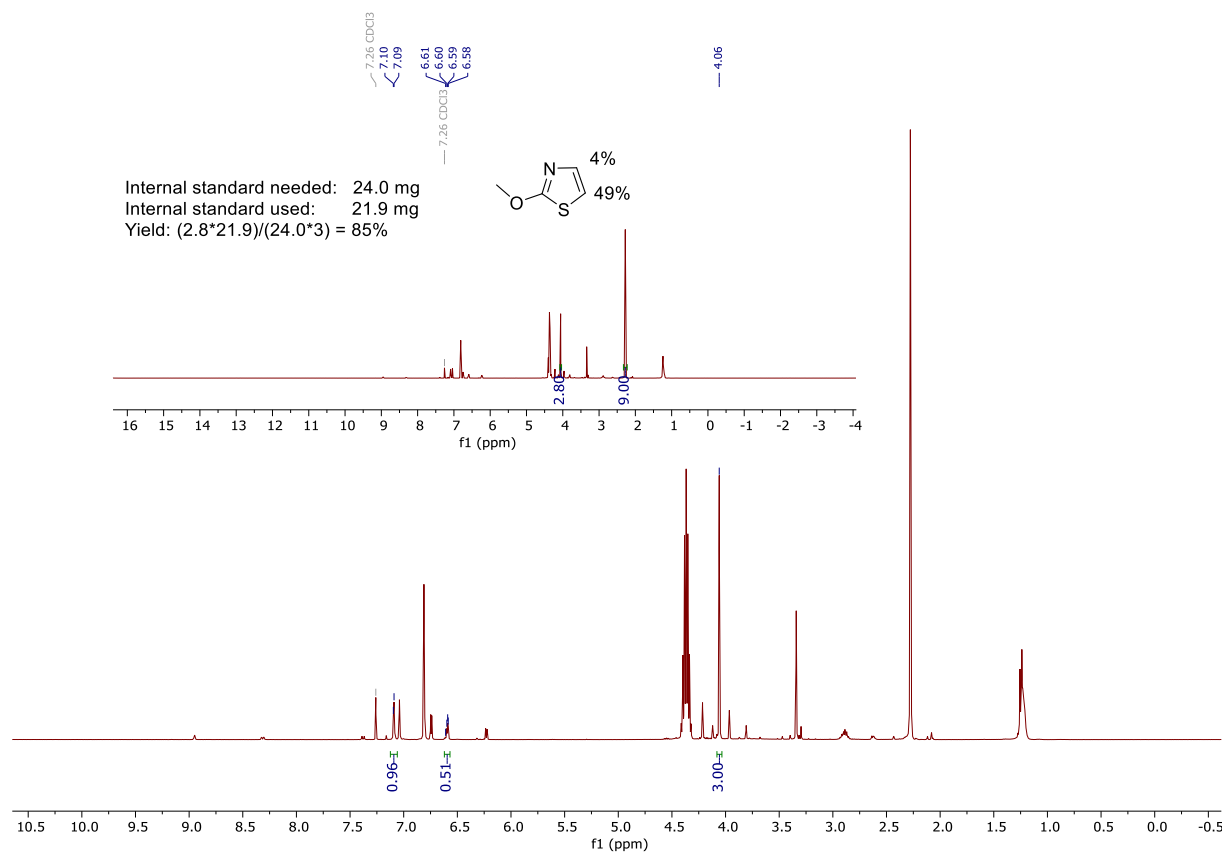



## Deuteration of 2,6-di-*tert*-butylpyridine (**19**):

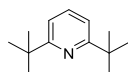

Following the general procedure F and using 2,6-di-*tert*-butylpyridine (**19**) (38.3 mg, 0.200 mmol), and purification via silica gel column chromatography using pentane:EtOAc = 9:1 as the eluent, the target compound [**D**]**19** was obtained as colorless solid (26.4 mg, 69%). The degree of deuteration was determined by mass spectrometry.

**Deuterium Incorporation:** 0.89 D/molecule [Mass]; 1.02 D/molecule [<sup>1</sup>H-NMR].

### NMR Data of Starting Material:

<sup>1</sup>H NMR (400 MHz, CDCl<sub>3</sub>) δ = 7.51 (t, *J* = 7.8 Hz, 1H), 7.09 (d, *J* = 7.8 Hz, 2H), 1.35 (s, 18H) ppm.

<sup>13</sup>C NMR (101 MHz, CDCl<sub>3</sub>) δ = 167.7, 136.1, 115.3, 37.8, 30.3 ppm.

### NMR Data of Product:

<sup>1</sup>H NMR (400 MHz, CDCl<sub>3</sub>) δ = 7.54-7.46 (m, 0.17H, 83% D), 7.11-7.05 (m, 1.80H, 10% D), 1.35 (s, 18H) ppm.

<sup>13</sup>C NMR (101 MHz, CDCl<sub>3</sub>) δ = 167.7, 136.9-134.0 (1C), 116.2-114.0 (2C), 37.8, 30.3 ppm

### Mass Data:

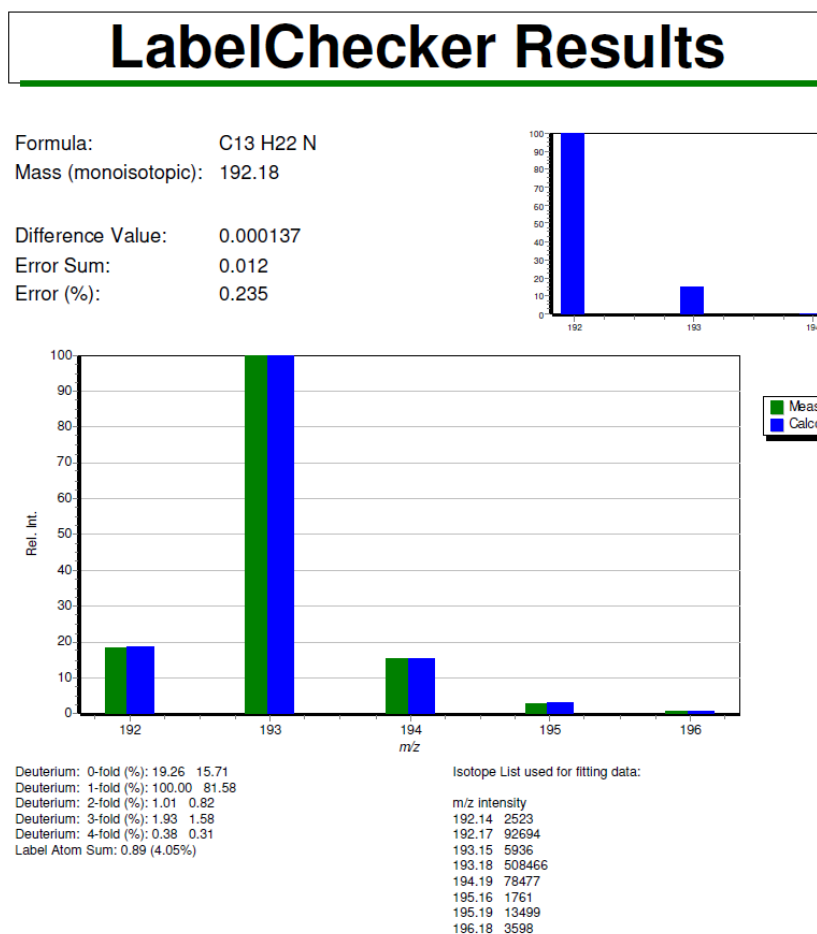

### <sup>1</sup>H-NMR spectrum in CDCl<sub>3</sub>:

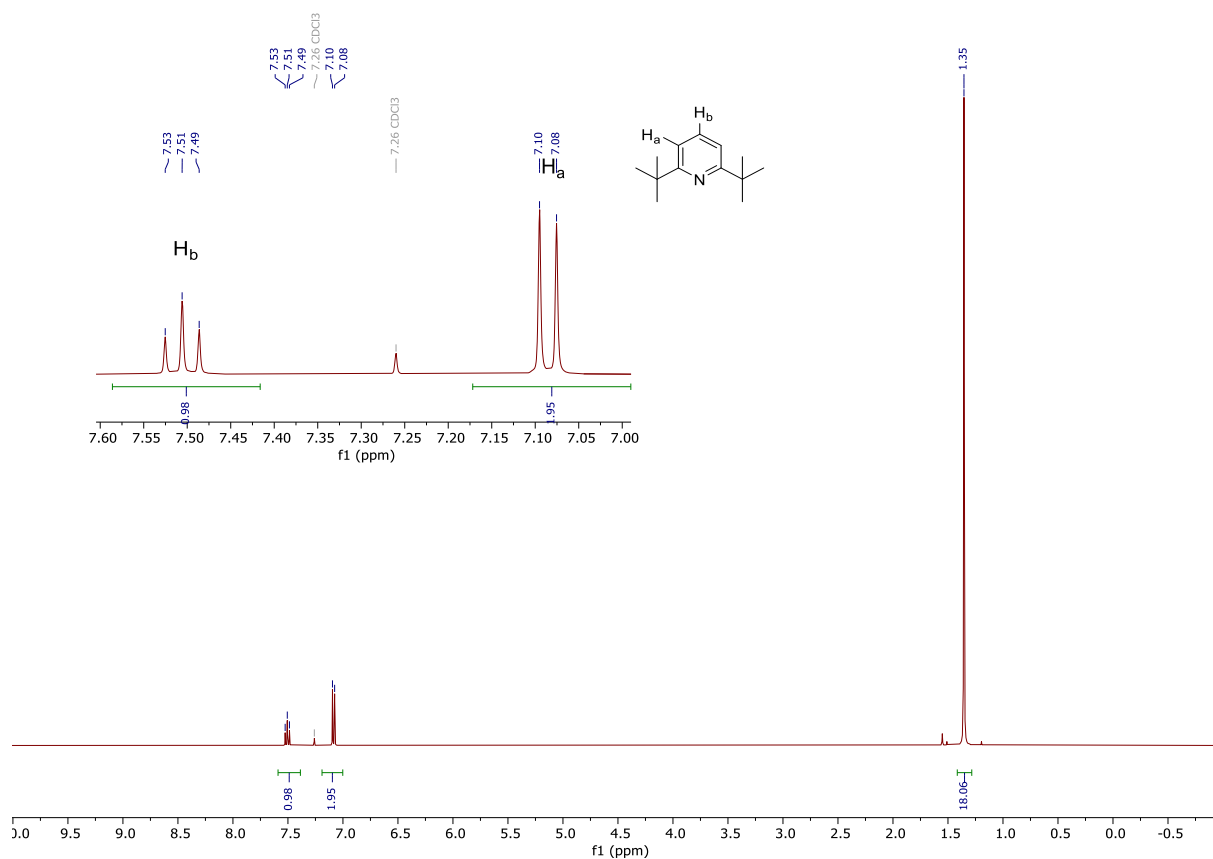

### <sup>1</sup>H-NMR spectrum in CDCl<sub>3</sub>:

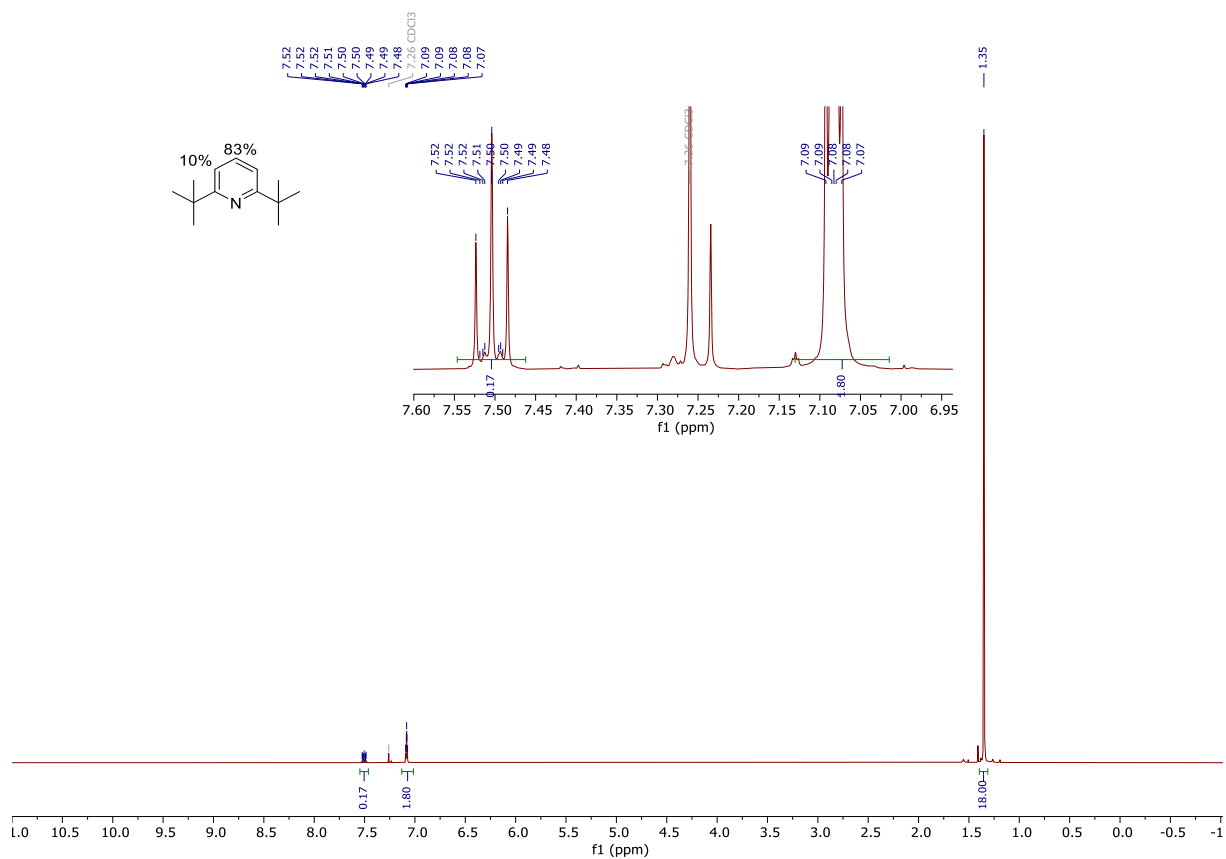

### <sup>13</sup>C-NMR spectrum in CDCl<sub>3</sub>:

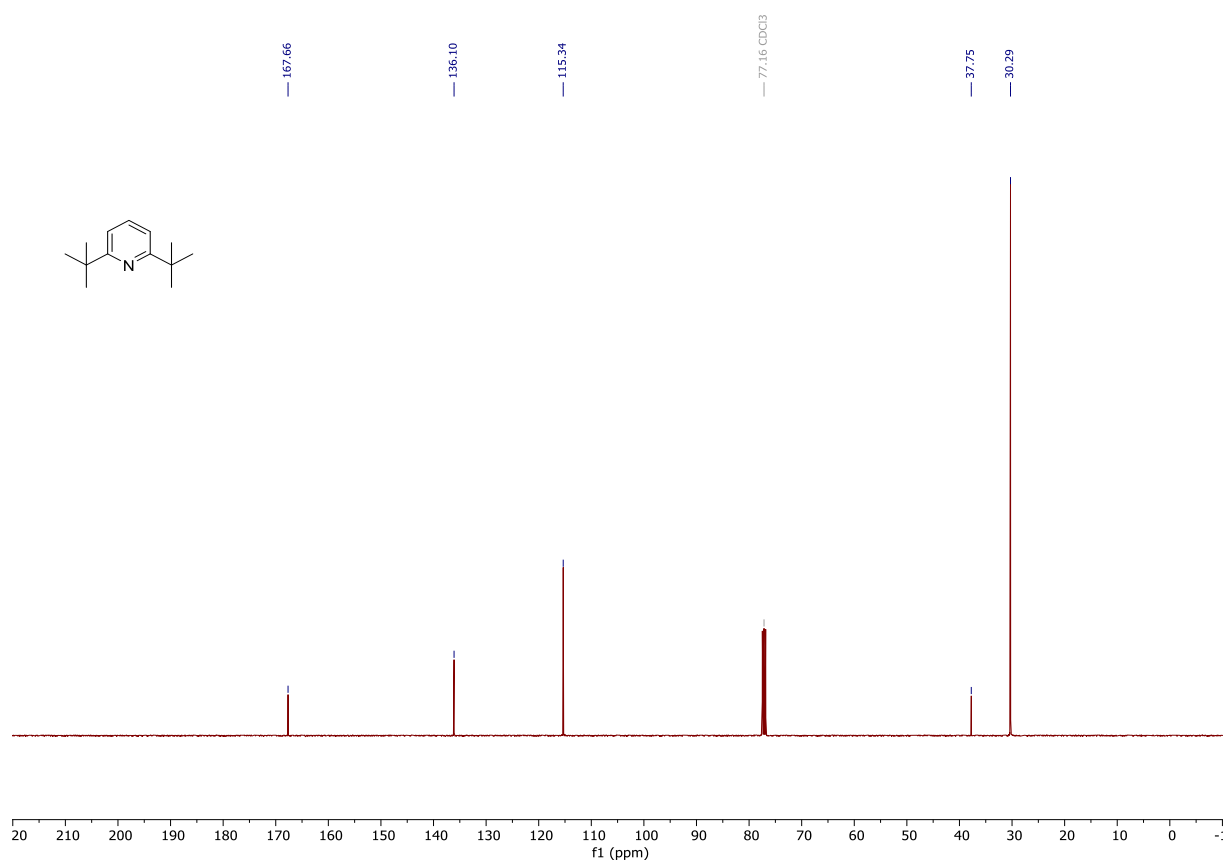

### <sup>13</sup>C-NMR spectrum in CDCl<sub>3</sub>:

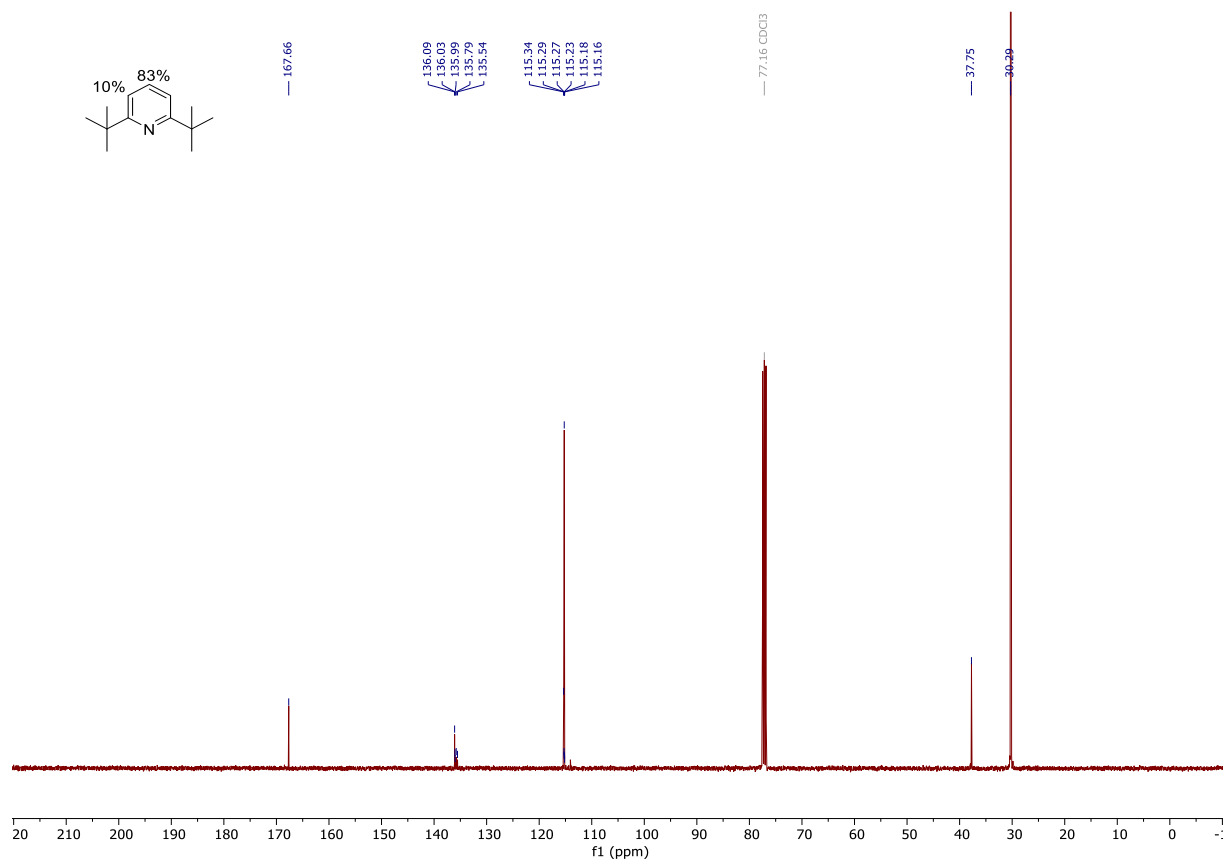

## Deuteration of (8*R*,9*S*,13*S*)-3-methoxy-13-methyl-6,7,8,9,11,12,13,14,15,16-decahydro-17*H*-cyclopenta[*a*]phenanthren-17-one (20):

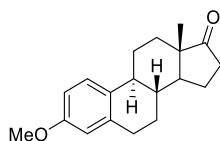

Following the general procedure E and using (8*R*,9*S*,13*S*)-3-methoxy-13-methyl-6,7,8,9,11,12,13,14,15,16-decahydro-17*H*-cyclopenta[*a*]phenanthren-17-one (**20**) (56.9 mg, 0.200 mmol), and purification via silica gel column chromatography using pentane:EtOAc = 3:1 as the eluent, the target compound [**D**]20 was obtained as colorless solid (49.3 mg, 86%). The degree of deuteration was determined by mass spectrometry.

**Deuterium Incorporation:** 2.21 D/molecule [HRMS]; 2.29 D/molecule [<sup>1</sup>H-NMR].

### NMR Data of Starting Material:

<sup>1</sup>H NMR (600 MHz, CDCl<sub>3</sub>) δ = 7.21 (d, *J* = 8.7 Hz, 1H), 6.72 (dd, *J* = 8.6, 2.8 Hz, 1H), 6.65 (d, *J* = 2.7 Hz, 1H), 3.78 (s, 3H), 2.94-2.86 (m, 2H), 2.50 (ddd, *J* = 19.1, 8.9, 1.0 Hz, 1H), 2.43-2.37 (m, 1H), 2.26 (td, *J* = 10.7, 4.4 Hz, 1H), 2.14 (dt, *J* = 19.0, 9.0 Hz, 1H), 2.09-1.98 (m, 2H), 1.97-1.93 (m, 1H), 1.67-1.56 (m, 2H), 1.54-1.40 (m, 4H), 0.91 (s, 3H) ppm.

<sup>13</sup>C NMR (100 MHz, CDCl<sub>3</sub>) δ = 221.1, 157.7, 137.9, 132.2, 126.5, 114.0, 111.7, 55.4, 50.6, 48.2, 44.1, 38.5, 36.0, 31.7, 29.8, 26.7, 26.1, 21.7, 14.0 ppm.

### NMR Data of Product:

<sup>1</sup>H NMR (400 MHz, CDCl<sub>3</sub>) δ = 7.21 (s, 0.63H, 37% H), 6.75-6.70 (m, 0.04H, 96% H), 6.65 (s, 0.04H, 96% H), 3.78 (s, 3H), 2.96-2.85 (m, 2H), 2.55-2.46 (m, 1H), 2.44-2.35 (m, 1H), 2.26 (td, *J* = 10.8, 3.9 Hz, 1H), 2.20-1.90 (m, 4H), 1.70-1.36 (m, 6H), 0.91 (s, 3H) ppm.

<sup>13</sup>C NMR (100 MHz, CDCl<sub>3</sub>) δ = 221.0, 157.6, 137.8, 132.2-131.9 (1C), 126.3, 114.2-113.3 (1C), 111.8-111.2 (1C), 55.3, 50.5, 48.1, 44.1, 44.1, 38.5, 36.0, 31.7, 29.7, 26.7, 26.0, 21.7, 14.0 ppm.

### Mass Data:

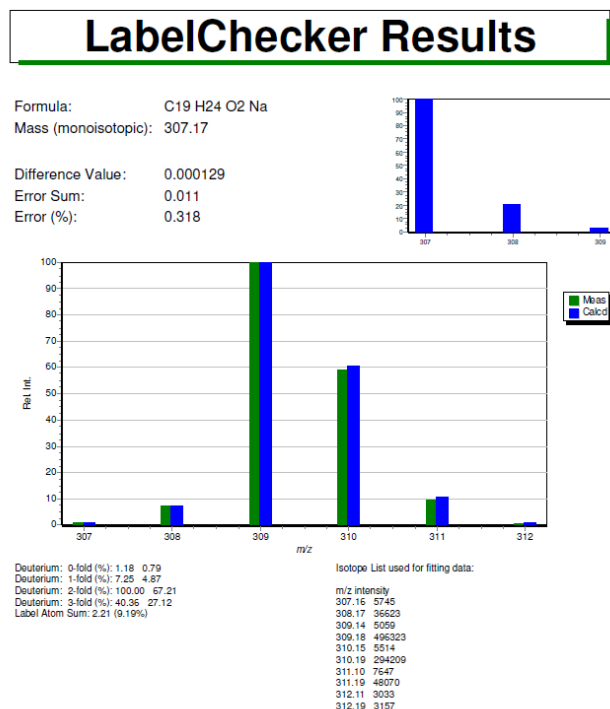



### <sup>13</sup>C-NMR spectrum in CDCl<sub>3</sub>:

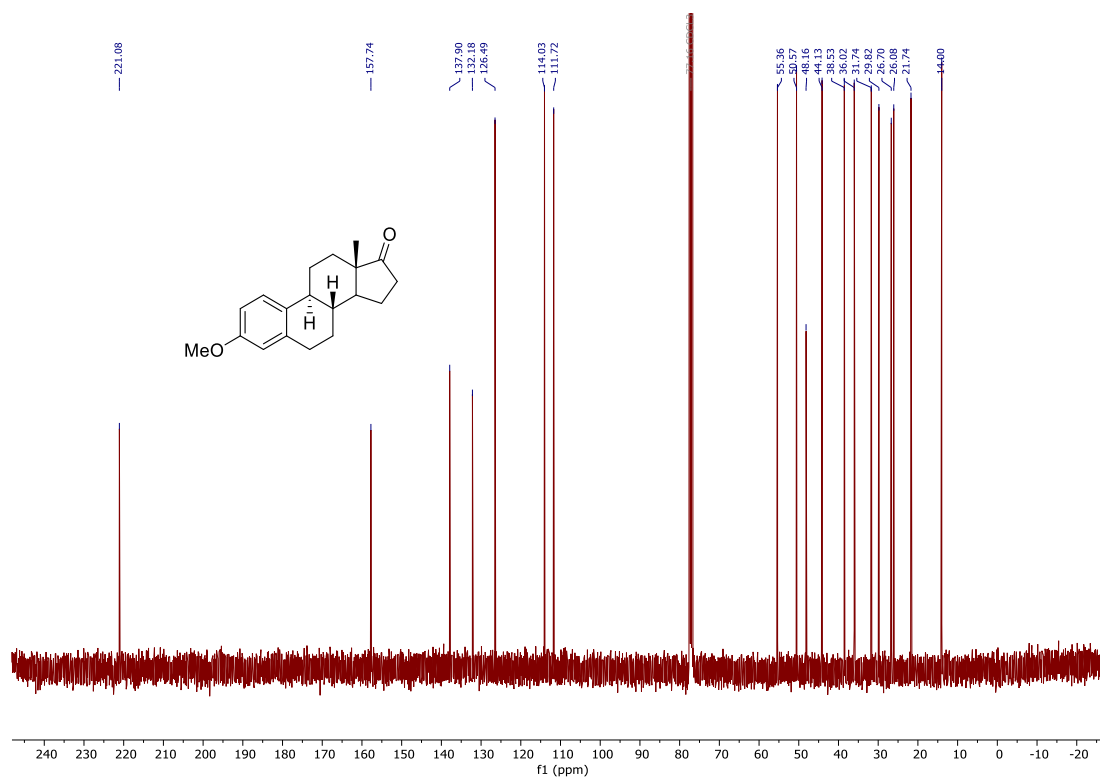

### <sup>13</sup>C-NMR spectrum in CDCl<sub>3</sub>:

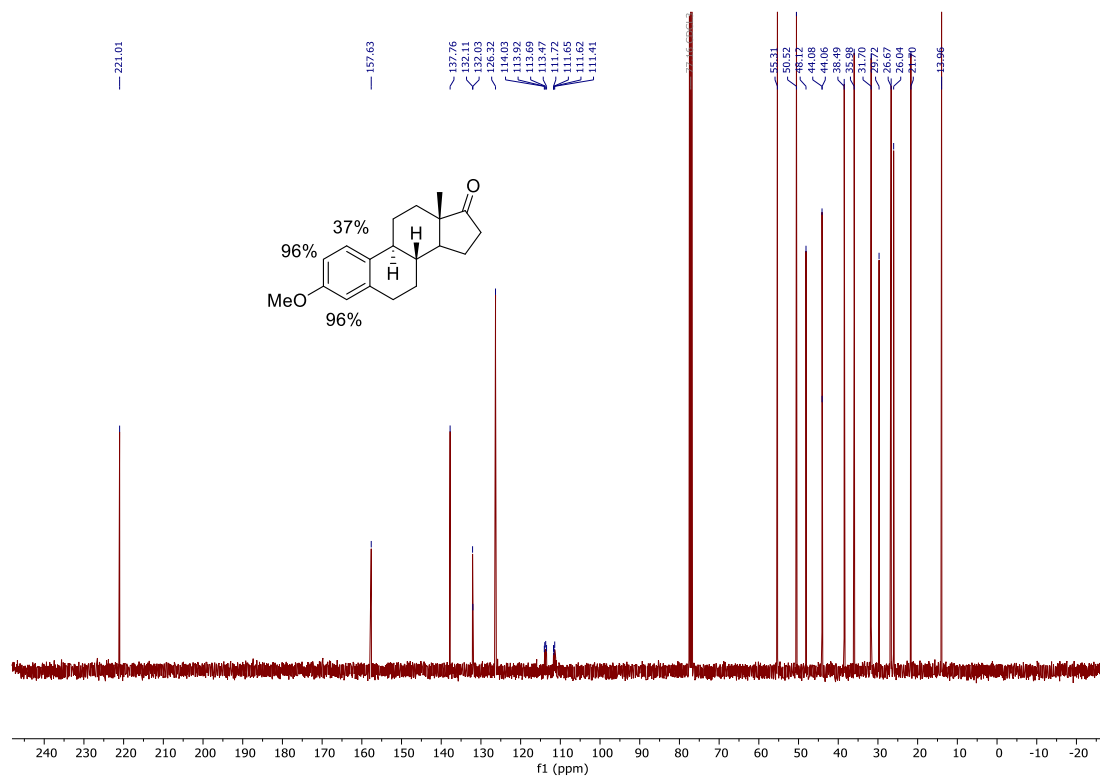

## Deuteration of methyl (*R*)-2-(1,3-dioxisoindolin-2-yl)-3-(4-methoxyphenyl)propanoate (**21**):

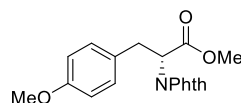

Following the general procedure E and using methyl (*R*)-2-(1,3-dioxisoindolin-2-yl)-3-(4-methoxyphenyl)propanoate (**21**) (67.9 mg, 0.200 mmol), and purification via silica gel column chromatography using EtOAc as the eluent, the target compound [**D**]**21** was obtained as colorless solid (66.5 mg, 97%). The degree of deuteration was determined by mass spectrometry.

**Deuterium Incorporation:** 2.80 D/molecule [HRMS]; 2.81 D/molecule [<sup>1</sup>H-NMR].

### NMR Data of Starting Material:

<sup>1</sup>H NMR (600 MHz, CDCl<sub>3</sub>) δ = 7.78 (dd, *J* = 5.5, 3.0 Hz, 2H), 7.69 (dd, *J* = 5.4, 3.1 Hz, 2H), 7.07 (d, *J* = 8.7 Hz, 2H), 6.71 (d, *J* = 8.7 Hz, 2H), 5.11 (dd, *J* = 11.3, 5.3 Hz, 1H), 3.77 (s, 3H), 3.70 (s, 3H), 3.57-3.45 (m, 2H) ppm.

<sup>13</sup>C NMR (100 MHz, CDCl<sub>3</sub>) δ = 169.5, 167.6, 158.5, 134.2, 131.8, 130.0, 128.8, 123.6, 114.1, 55.2, 53.6, 53.0, 33.9 ppm.

### NMR Data of Product:

<sup>1</sup>H NMR (400 MHz, CDCl<sub>3</sub>) δ = 7.77 (dd, *J* = 5.4, 3.1 Hz, 1H), 7.68 (dd, *J* = 5.5, 3.0 Hz, 1H), 7.06 (s, 1.10H, 45% D), 6.73-6.69 (m, 0.09H, 96% D), 5.11 (dd, *J* = 10.9, 5.7 Hz, 1H), 3.77 (s, 3H), 3.69 (s, 3H), 3.57-3.43 (m, 2H) ppm.

<sup>13</sup>C NMR (100 MHz, CDCl<sub>3</sub>) δ = 169.5, 167.6, 158.4, 134.2, 131.7, 129.8, 128.7-128.3 (2C), 123.6, 114.2-113.2 (2C), 55.2, 53.5, 53.0, 33.9-33.5 (1C) ppm.

### Mass Data:

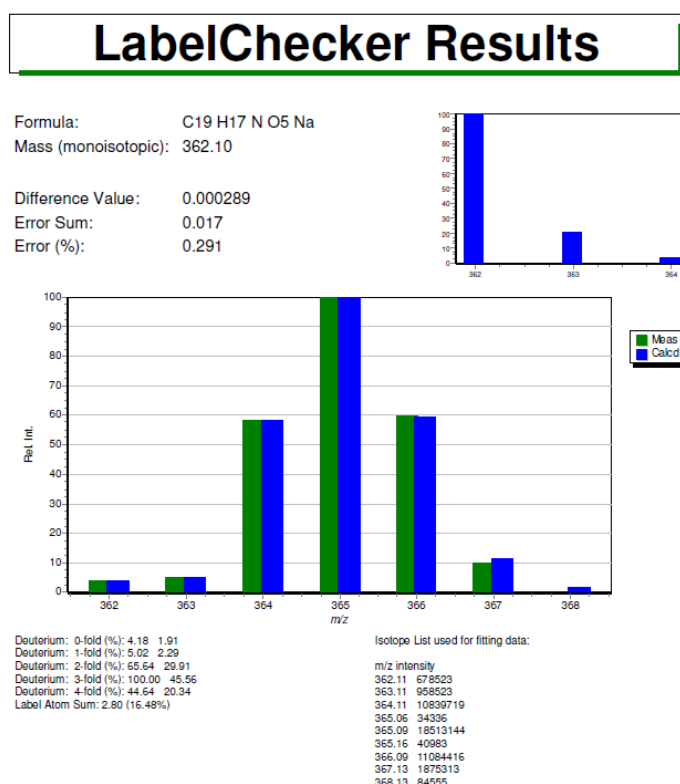

### <sup>1</sup>H-NMR spectrum in CDCl<sub>3</sub>:

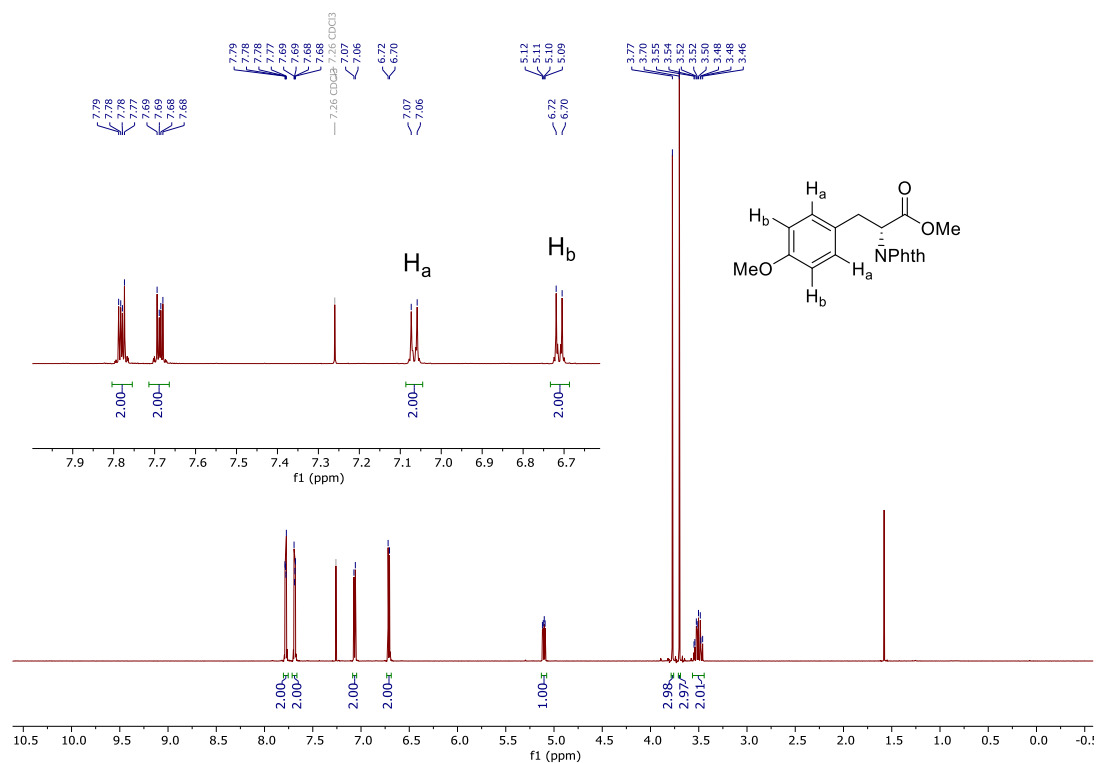

### <sup>1</sup>H-NMR spectrum in CDCl<sub>3</sub>:

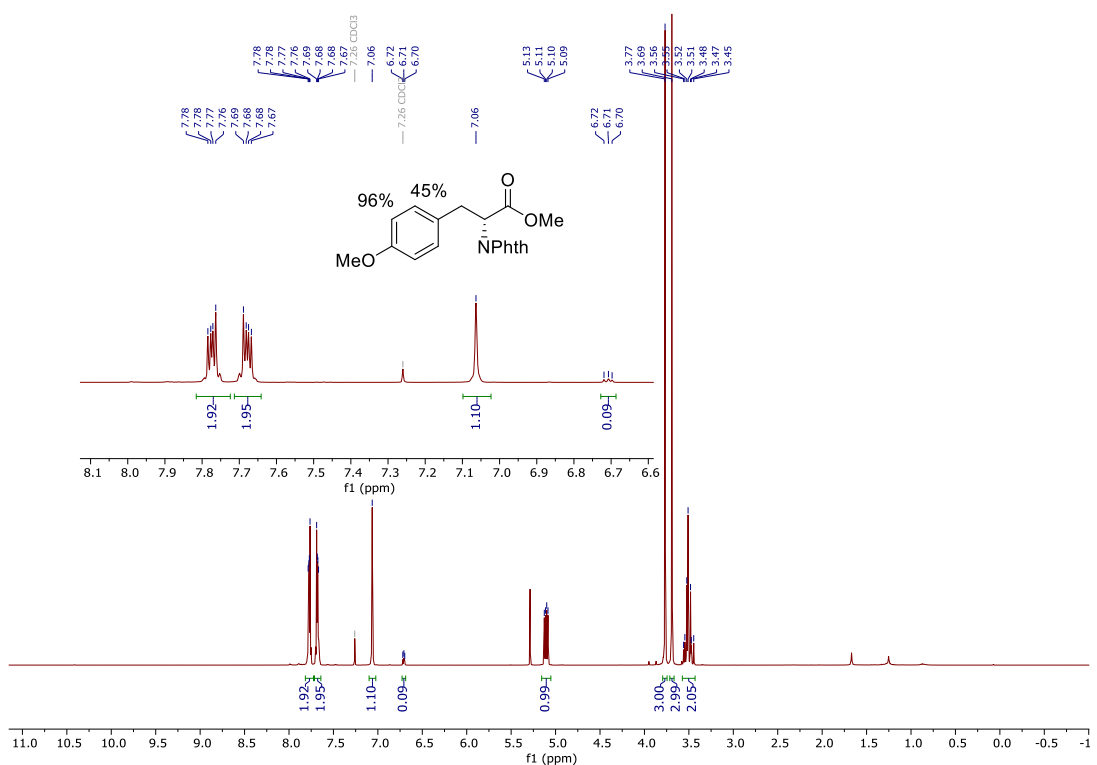



### <sup>13</sup>C-NMR spectrum in CDCl<sub>3</sub>:

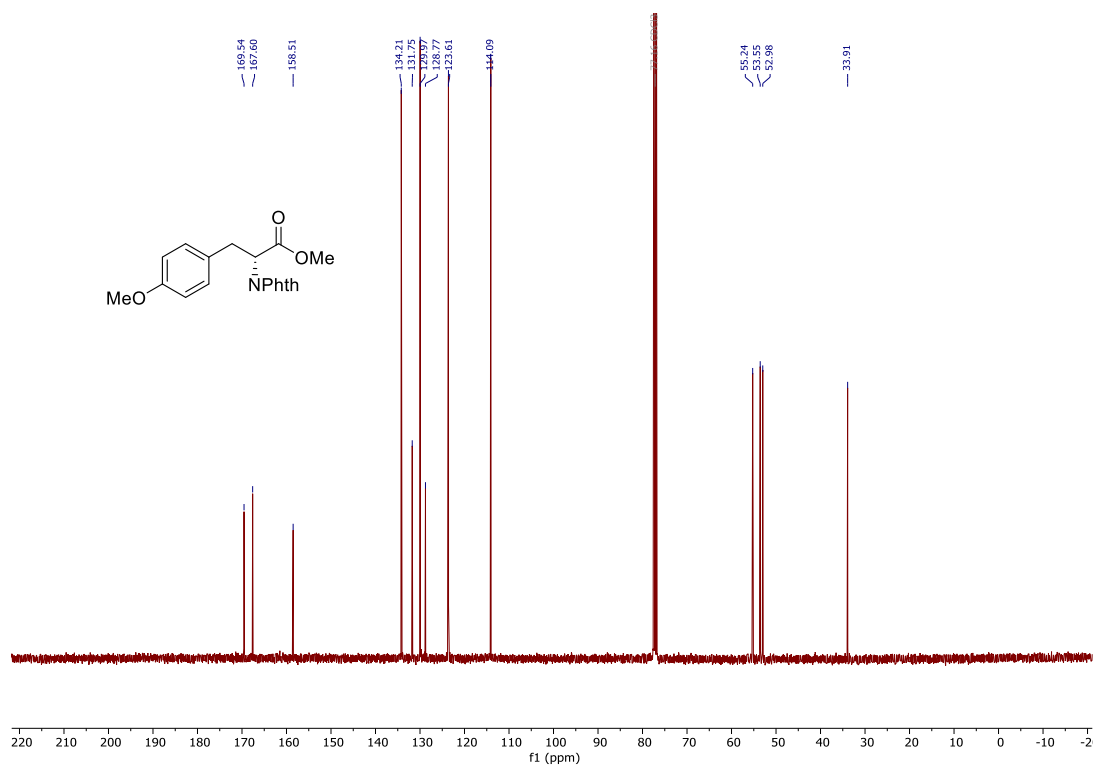

### <sup>13</sup>C-NMR spectrum in CDCl<sub>3</sub>:

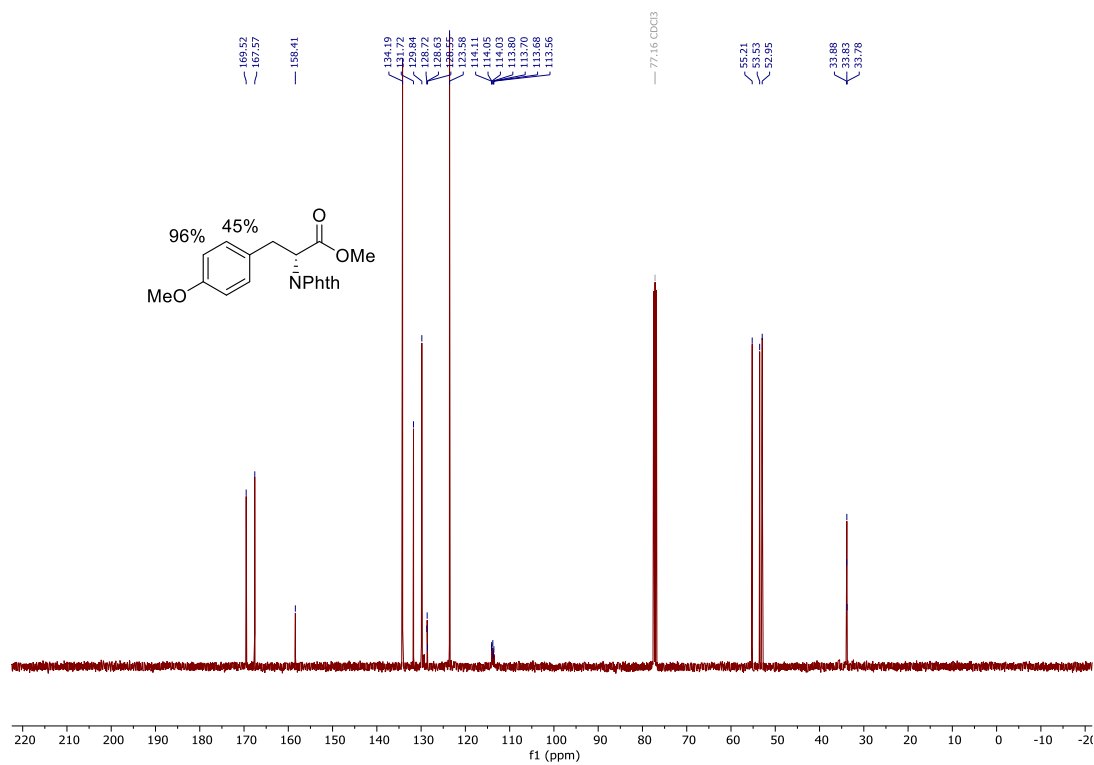

## Deuteration of (*R*)-2-rel-((1*r*,4*R*)-4-Isopropylcyclohexanecarboxamido)-3-phenylpropanoate (**22**):

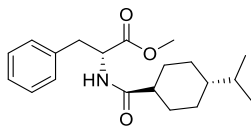

Following the general procedure E and using (*R*)-2-rel-((1*r*,4*R*)-4-Isopropylcyclohexanecarboxamido)-3-phenylpropanoate (**22**) (66.3 mg, 0.200 mmol), and purification via silica gel column chromatography using pentane:EtOAc = 80:20 as the eluent, the target compound [**D**]**22** was obtained as colorless liquid (62 mg, 92%). The degree of deuteration was determined by mass spectrometry.

**Deuterium Incorporation:** 4.42 D/molecule [HRMS]. 4.38 D/molecule [<sup>1</sup>H-NMR].

### NMR Data of Starting Material:

<sup>1</sup>H NMR (600 MHz, CDCl<sub>3</sub>) δ = 7.30-7.26 (m, 2H), 7.26-7.22 (m, 1H), 7.09-7.05 (m, 2H), 5.87 (d, *J* = 7.7 Hz, 1H), 4.91-4.86 (m, 1H), 3.73 (s, 3H), 3.18-3.06 (m, 2H), 2.04-1.95 (m, 1H), 1.92-1.82 (m, 2H), 1.80-1.73 (m, 2H), 1.45-1.33 (m, 3H), 1.09-0.91 (m, 3H), 0.85 (d, *J* = 6.8 Hz, 6H) ppm.

<sup>13</sup>C NMR (125 MHz, CDCl<sub>3</sub>) δ = 175.7, 172.4, 136.1, 129.5, 128.6, 127.2, 52.8, 52.4, 45.6, 43.4, 38.0, 32.9, 29.9, 29.6, 29.1, 29.0, 19.8(65), 19.8(61) ppm.

### NMR Data of Product:

<sup>1</sup>H NMR (600 MHz, CDCl<sub>3</sub>) δ = 7.30-7.26 (m, 0.29H, 85.5% D), 7.25-7.21 (m, 0.09H, 91% D), 7.09-7.05 (m, 0.24H, 88% D), 5.87 (d, *J* = 7.8 Hz, 1H), 4.91-4.86 (m, 1H), 3.73 (s, 3H), 3.20-3.05 (m, 1H), 2.04-1.96 (m, 1H), 1.92-1.82 (m, 2H), 1.80-1.74 (m, 2H), 1.44-1.34 (m, 3H), 1.09-0.91 (m, 3H), 0.85 (d, *J* = 6.8 Hz, 6H) ppm.

<sup>13</sup>C NMR (126 MHz, CDCl<sub>3</sub>) δ = 175.7, 172.3, 136.0-135.9(1C), 129.3-127.4 (5C), 52.9, 52.4, 45.7, 43.4, 38.0-37.9(1C), 32.9, 29.9, 29.6, 29.1, 29.0, 19.8, 19.8(7)-19.8(6) ppm.

### Mass Data:

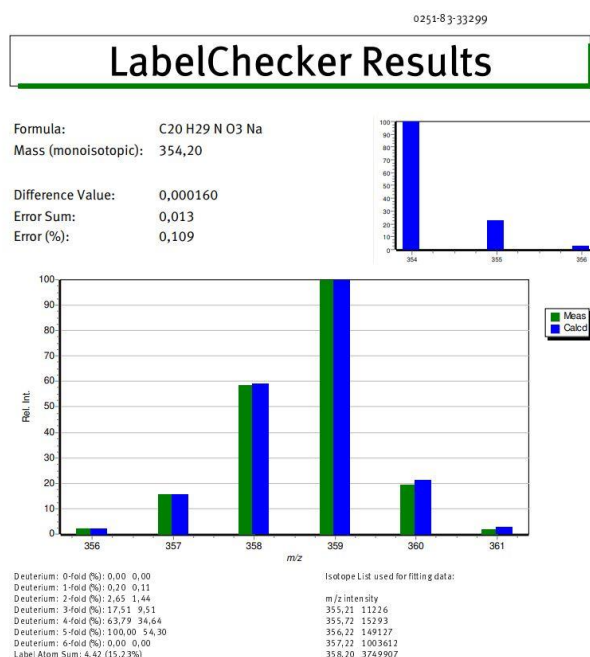



**<sup>13</sup>C-NMR spectrum in CDCl<sub>3</sub>:**

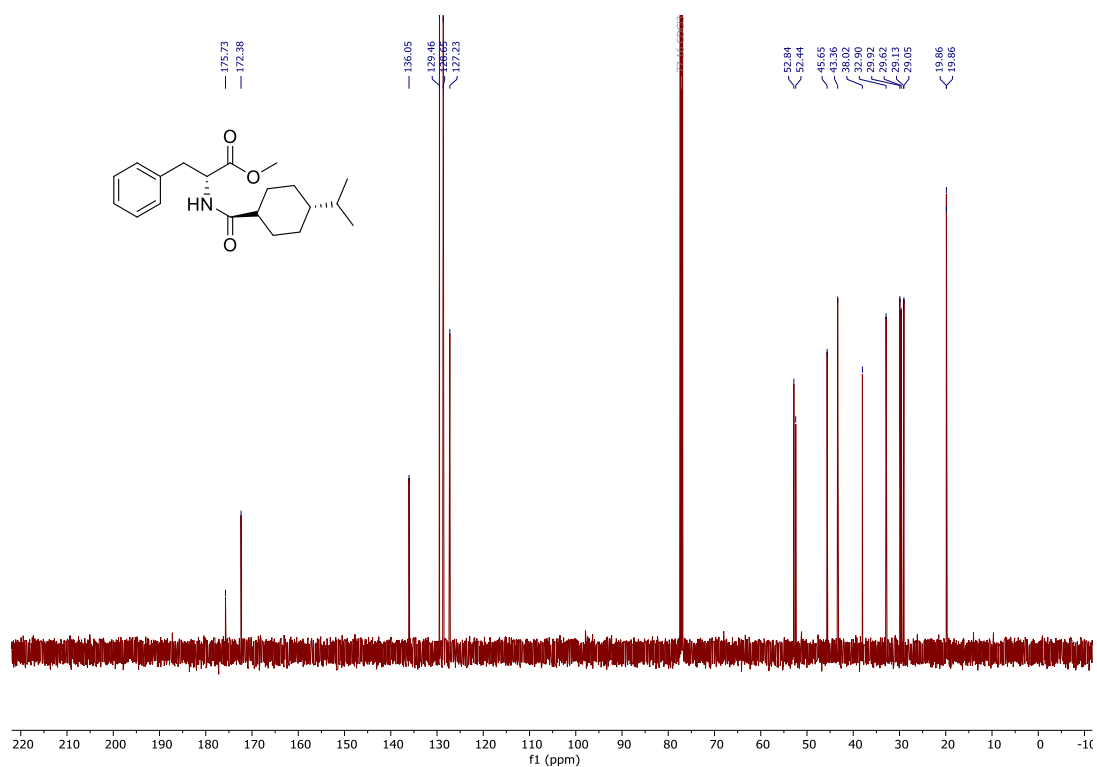

**<sup>13</sup>C-NMR spectrum in CDCl<sub>3</sub>:**

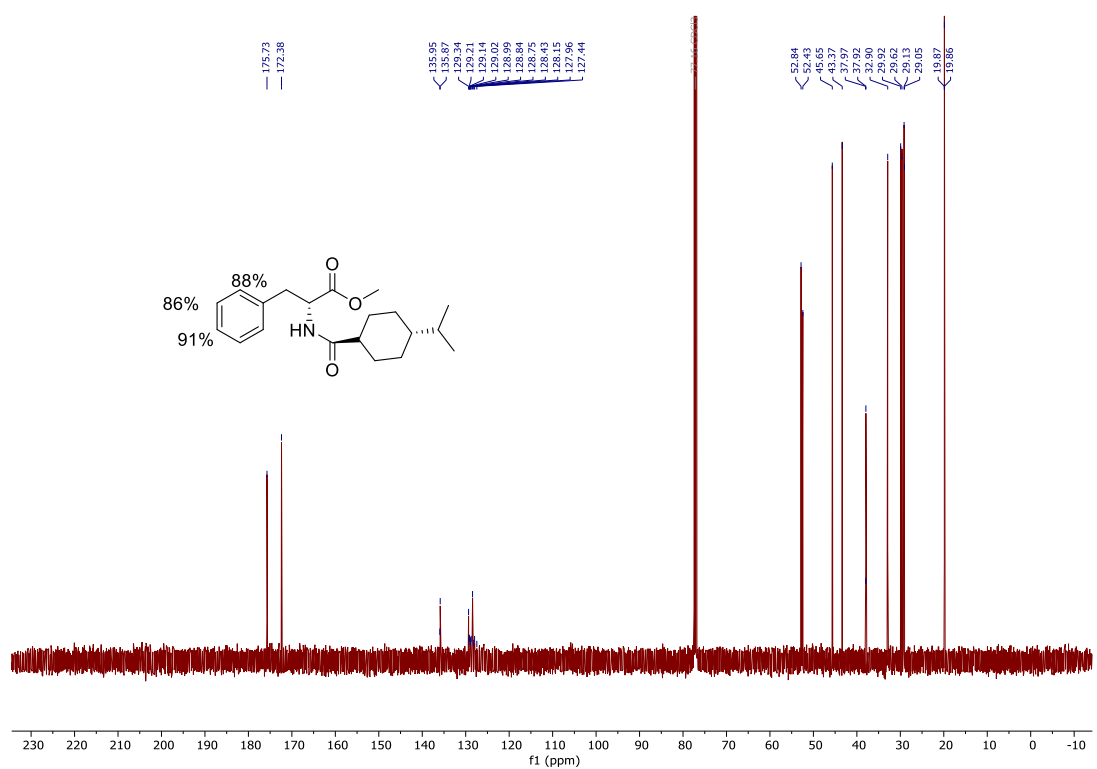

## Deuteration of (*R*)-4-benzyl-3-propionyloxazolidin-2-one (**23**):

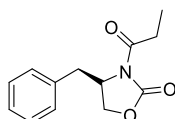

Following the general procedure E and using (*R*)-4-benzyl-3-propionyloxazolidin-2-one (**23**) (46.7 mg, 0.200 mmol), and purification via silica gel column chromatography using pentane:EtOAc = 80:20 as the eluent, the target compound [**D**]**23** was obtained as colorless liquid (46.5 mg, 98%). The degree of deuteration was determined by mass spectrometry.

**Deuterium Incorporation:** 3.63 D/molecule [HRMS]; 3.78 D/molecule [<sup>1</sup>H-NMR].

### NMR Data of Starting Material:

<sup>1</sup>H NMR (600 MHz, CDCl<sub>3</sub>) δ = 7.36-7.31 (m, 2H), 7.30-7.26 (m, 1H), 7.22-7.19 (m, 2H), 4.70-4.64 (m, 1H), 4.22-4.15 (m, 2H), 3.31 (dd, *J* = 13.4, 3.4 Hz, 1H), 3.04-2.88 (m, 2H), 2.77 (dd, *J* = 13.4, 9.6 Hz, 1H), 1.21 (t, *J* = 7.4 Hz, 3H) ppm.

<sup>13</sup>C NMR (126 MHz, CDCl<sub>3</sub>) δ = 174.2, 153.7, 135.5, 129.6, 129.1, 127.5, 66.4, 55.3, 38.1, 29.3, 8.4 ppm.

### NMR Data of Product:

<sup>1</sup>H NMR (600 MHz, CDCl<sub>3</sub>) δ = 7.35-7.31 (m, 0.32H, 84% D), 7.28-7.26 (m, 0.06H, 94% D), 7.23-7.18 (m, 0.84H, 58% D) 4.70-4.64 (m, 1H), 4.22-4.13 (m, 2H), 3.31 (dd, *J* = 13.4, 3.4 Hz, 1H), 3.03-2.88 (m, 2H), 2.77 (dd, *J* = 13.4, 9.6 Hz, 1H), 1.20 (t, *J* = 7.4 Hz, 3H) ppm.

<sup>13</sup>C NMR (126 MHz, CDCl<sub>3</sub>) δ = 174.2, 153.6, 135.4-135.3(1C), 129.5-128.3(4C), 127.3-126.7(1C), 66.3, 55.3, 38.0-37.9(1C), 29.3, 8.4 ppm.

### Mass Data:

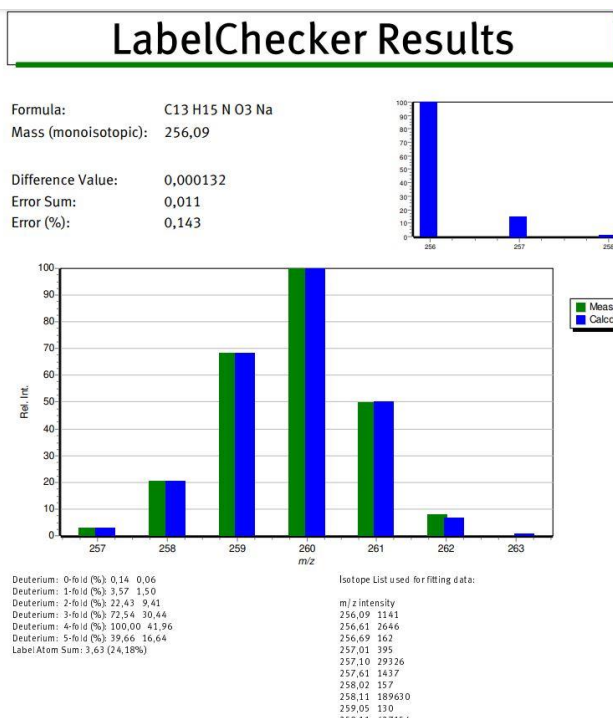

# <sup>1</sup>H-NMR spectrum in CDCl<sub>3</sub>:

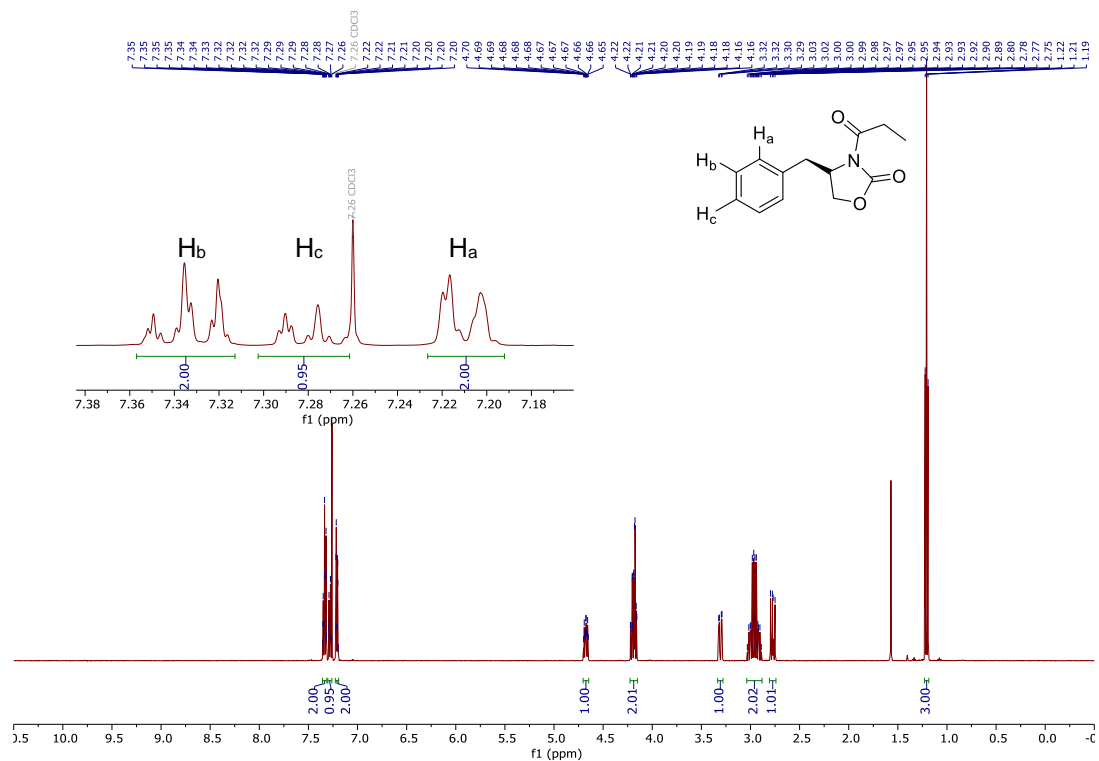

# <sup>1</sup>H-NMR spectrum in CDCl<sub>3</sub>:

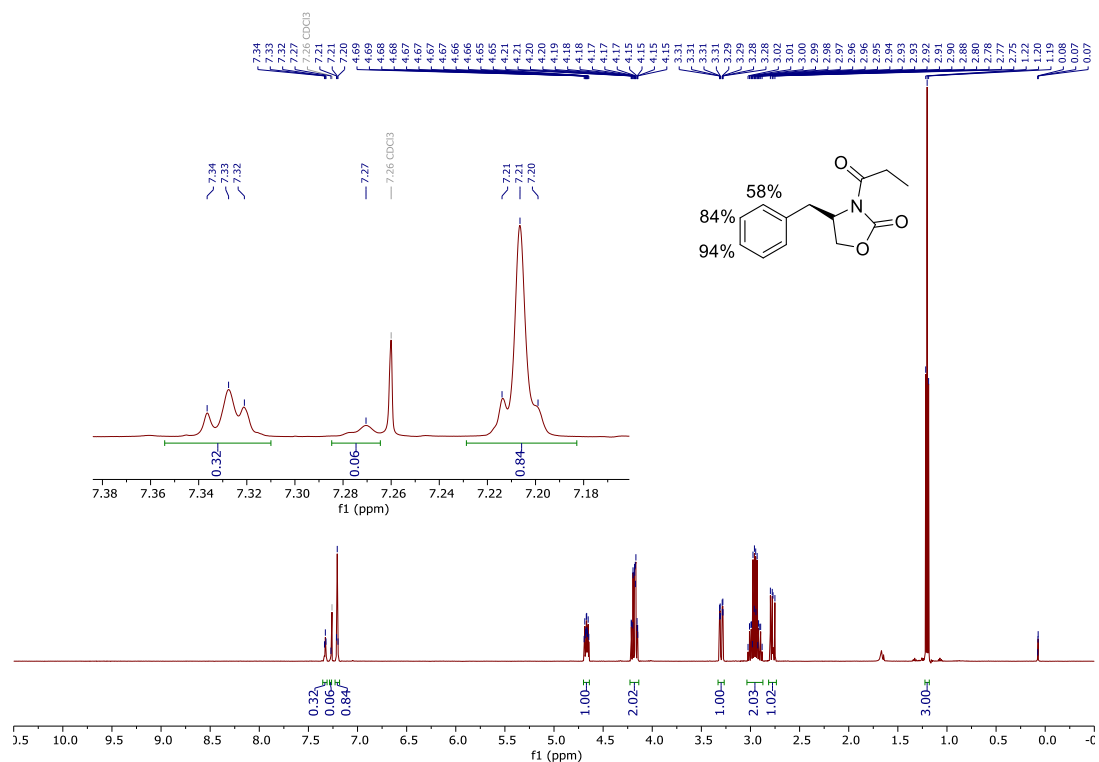

### <sup>13</sup>C-NMR spectrum in CDCl<sub>3</sub>:

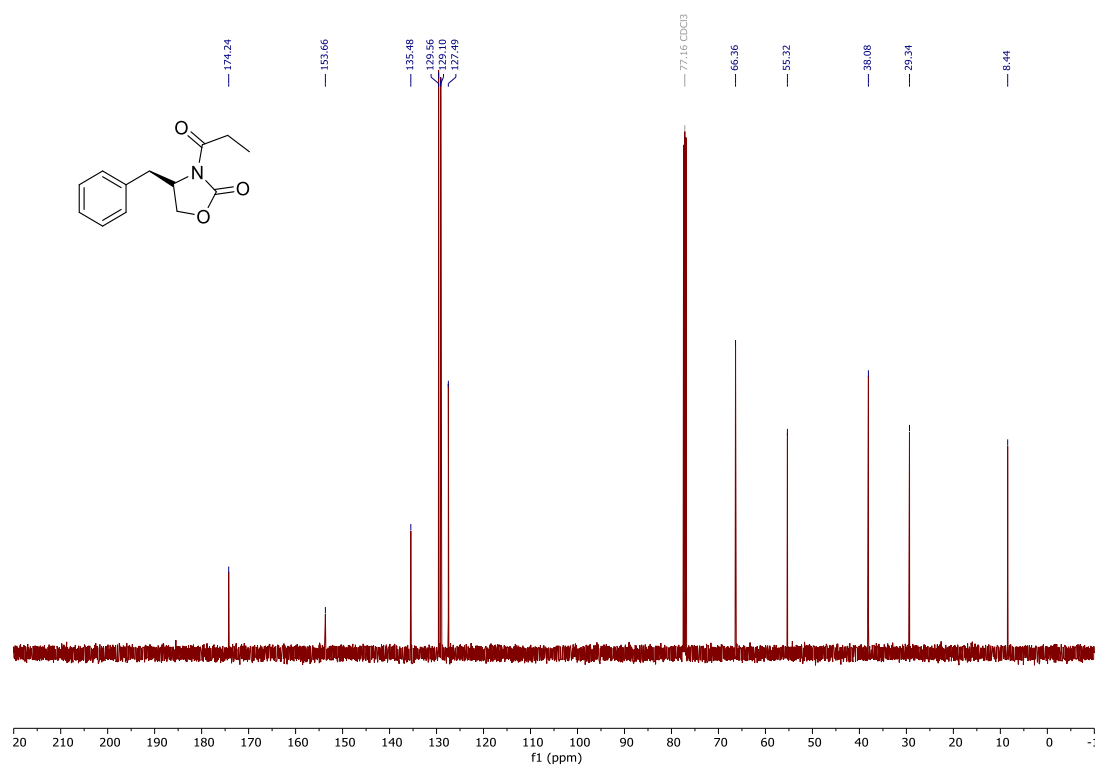

### <sup>13</sup>C-NMR spectrum in CDCl<sub>3</sub>:

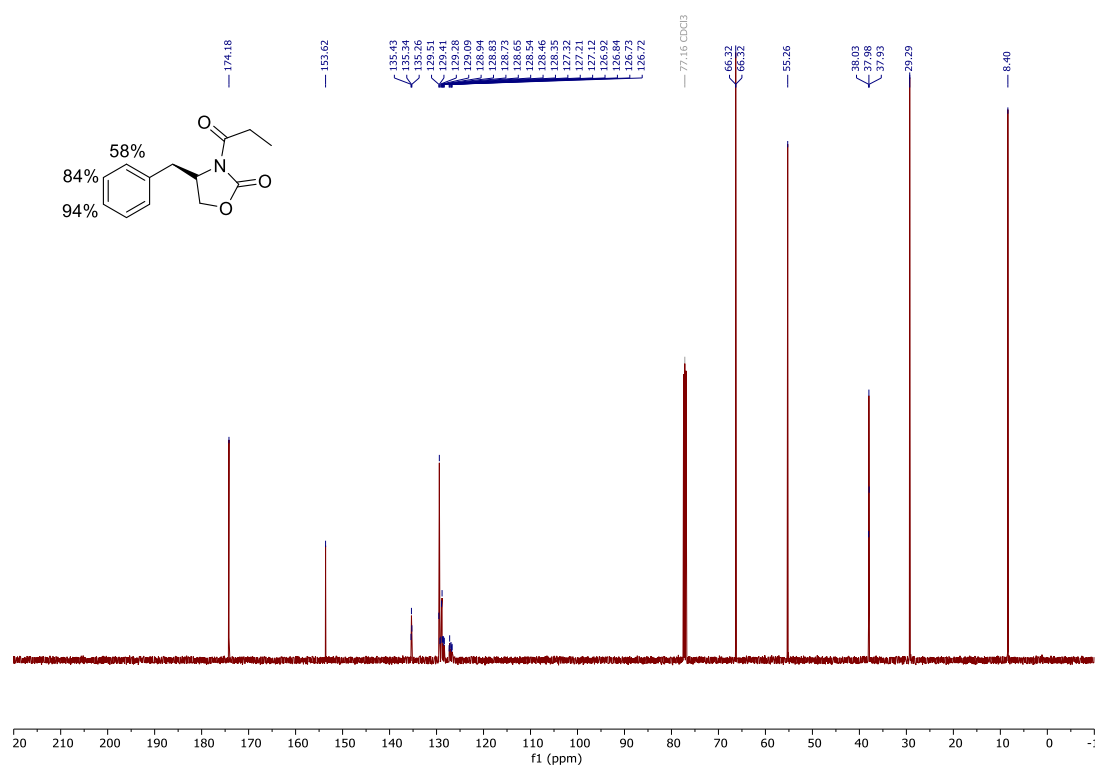

## Deuteration of 1-(2,3-dimethoxypropoxy)-2-methoxybenzene (**24**)

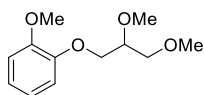

Following the general procedure E and using 1-(2,3-dimethoxypropoxy)-2-methoxybenzene (**24**) (45.3 mg, 0.200 mmol), and purification via silica gel column chromatography using pentane:EtOAc = 80:20 as the eluent, the target compound [**D**]**24** was obtained as colorless liquid (41.8 mg, 91%). The degree of deuteration was determined by mass spectrometry.

**Deuterium Incorporation:** 3.85 D/molecule [HRMS]; 3.84 D/molecule [<sup>1</sup>H-NMR].

### NMR Data of Starting Material:

<sup>1</sup>H NMR (599 MHz, C<sub>6</sub>D<sub>6</sub>) δ = 6.85-6.81 (m, 1H), 6.81-6.78 (m, 2H), 6.65-6.62 (m, 1H), 4.07-3.99 (m, 2H), 3.71 (p, *J* = 5.2 Hz, 1H), 3.51-3.43 (m, 2H), 3.39 (s, 3H), 3.34 (s, 3H), 3.09 (s, 3H) ppm.

<sup>13</sup>C NMR (151 MHz, C<sub>6</sub>D<sub>6</sub>) δ = 150.6, 149.6, 121.6, 121.2, 114.6, 112.9, 79.3, 72.8, 69.6, 58.9, 58.1, 55.6 ppm.

<sup>1</sup>H NMR (599 MHz, C<sub>6</sub>D<sub>6</sub>) δ = 6.84-6.82 (m, 0.04H, 96% D), 6.81-6.79 (m, 0.08H, 96% D), 6.65-6.63 (m, 0.04H, 96% D), 4.07-3.98 (m, 2H), 3.71 (p, *J* = 5.2 Hz, 1H), 3.52-3.43 (m, 2H), 3.40 (s, 3H), 3.34 (s, 3H), 3.09 (s, 3H) ppm.

<sup>13</sup>C NMR (151 MHz, C<sub>6</sub>D<sub>6</sub>) δ = 150.1, 149.1, 121.0-120.8(2C), 114.1-113.6(1C), 112.4-111.9(1C), 78.9, 72.4, 69.1, 58.5, 57.7, 55.2 ppm.

### Mass Data:

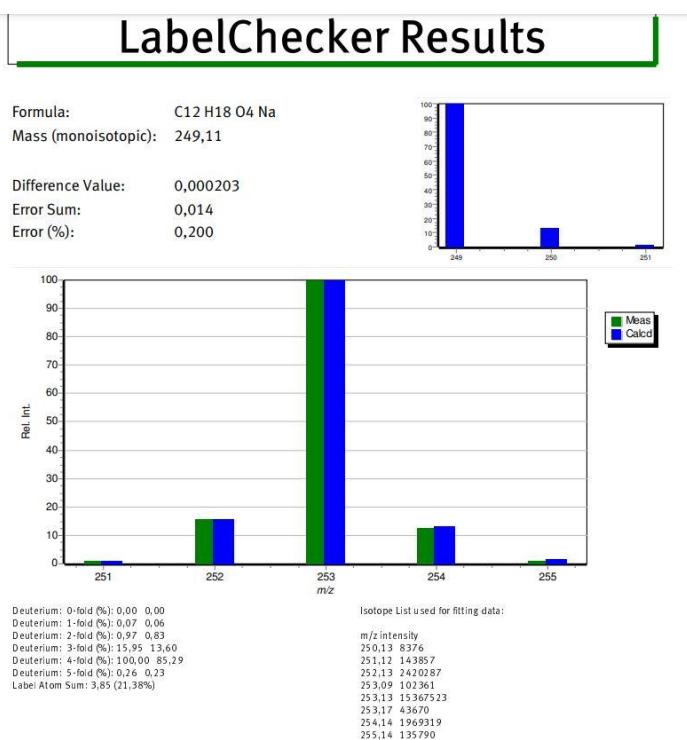



# <sup>1</sup>H-NMR spectrum in C<sub>6</sub>D<sub>6</sub>:

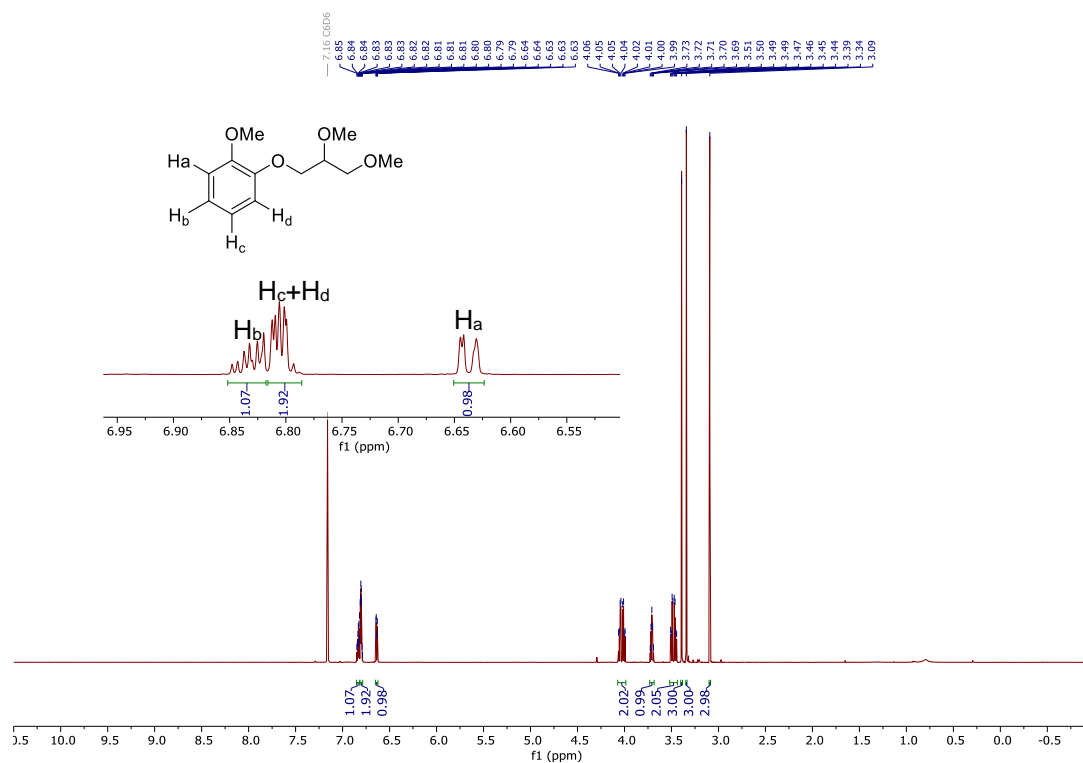

# <sup>1</sup>H-NMR spectrum in C<sub>6</sub>D<sub>6</sub>

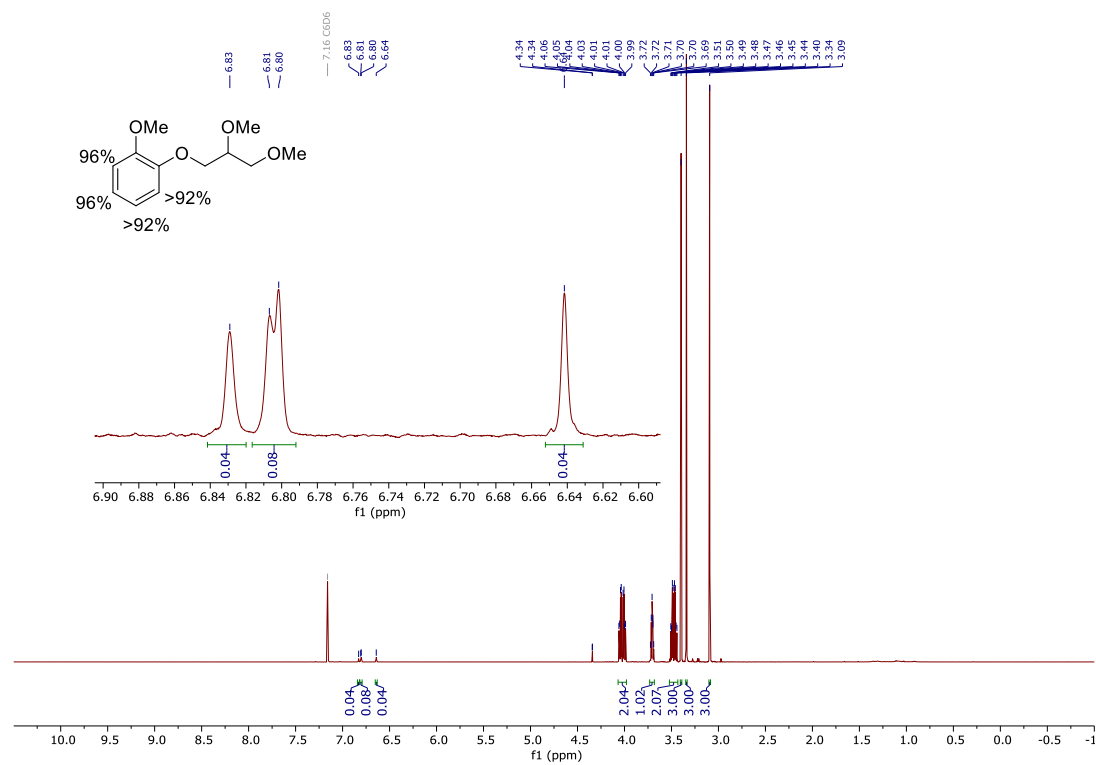

### <sup>13</sup>C-NMR spectrum in C<sub>6</sub>D<sub>6</sub>:

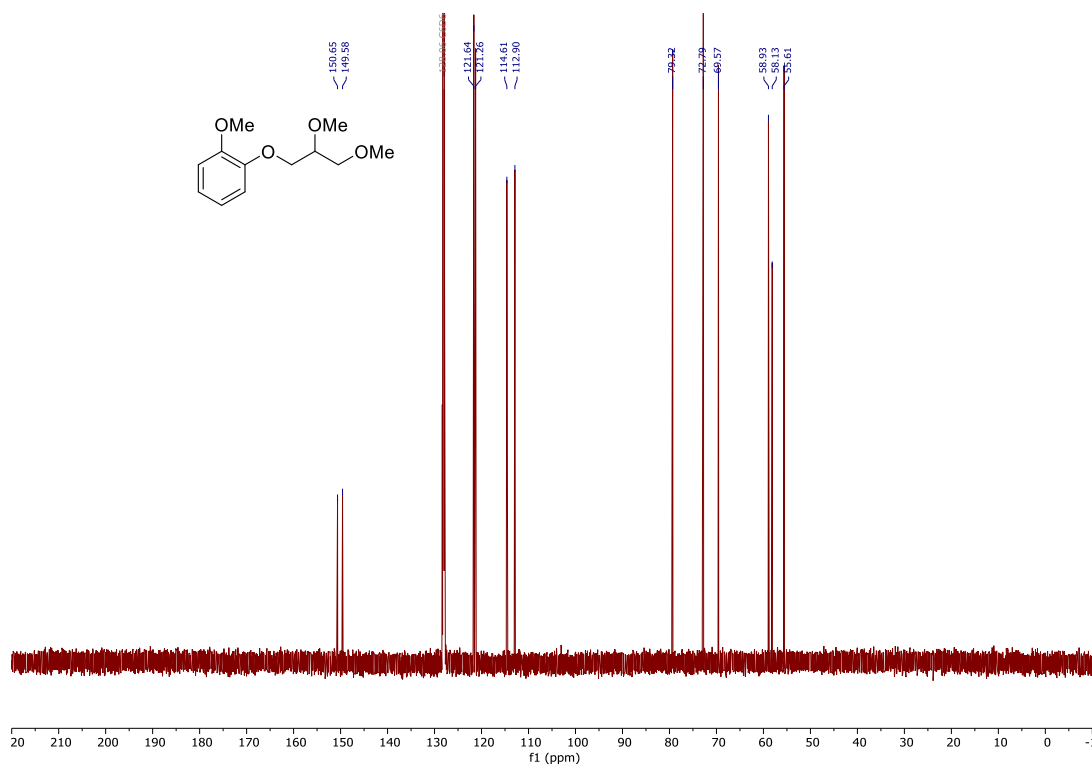

### <sup>13</sup>C-NMR spectrum in C<sub>6</sub>D<sub>6</sub>:

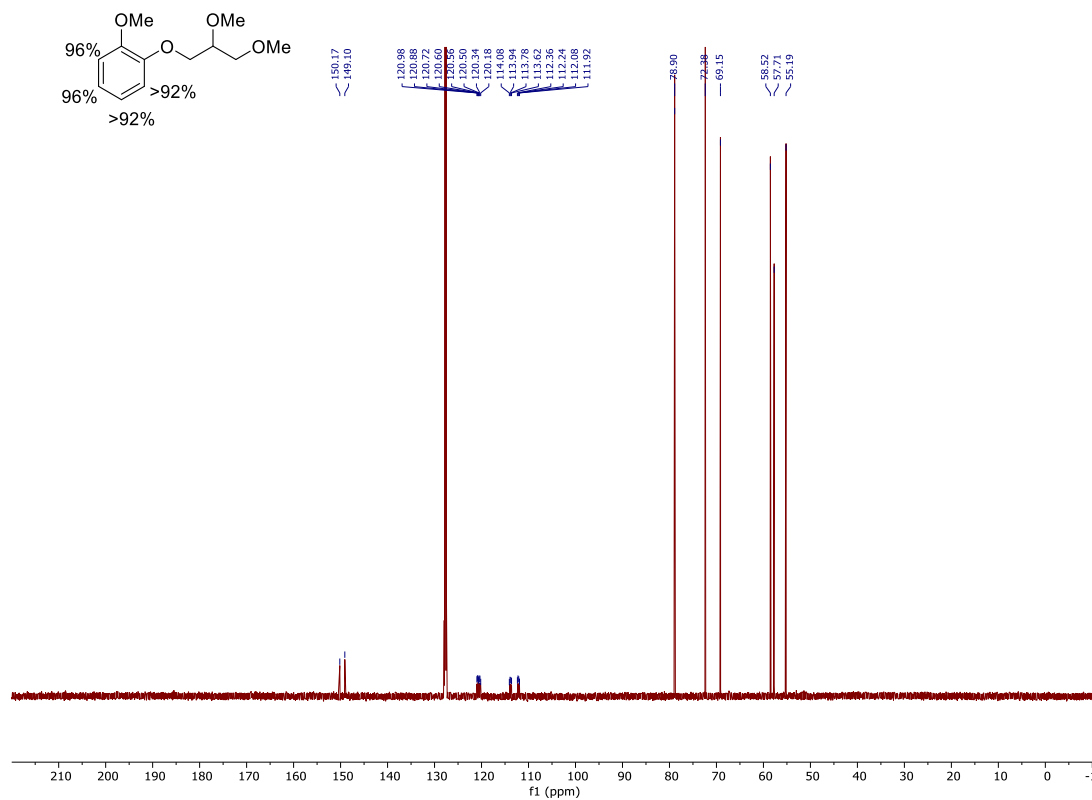

## Deuteration of 7-methyl-2*H*-benzo[*b*][1,4]dioxepin-3(4*H*)-one (25):

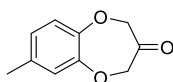

Following the general procedure E and using 7-methyl-2*H*-benzo[*b*][1,4]dioxepin-3(4*H*)-one (**25**) (35.6 mg, 0.200 mmol), and purification via silica gel column chromatography using pentane:EtOAc = 15:1 as the eluent, the target compound [**D**]25 was obtained as a colorless solid (31.2 mg, 86%). The degree of deuteration was determined by mass spectrometry.

**Deuterium Incorporation:** 2.44 D/molecule [HRMS]; 2.37 D/molecule [<sup>1</sup>H-NMR].

### NMR Data of Starting Material:

<sup>1</sup>H NMR (400 MHz, CDCl<sub>3</sub>) δ = 6.89 (d, *J* = 8.2 Hz, 1H), 6.81 (d, *J* = 2.1 Hz, 1H), 6.77 (dd, *J* = 8.2, 2.1 Hz, 1H), 4.70 (s, 2H), 4.67 (s, 2H), 2.27 (s, 3H) ppm.

<sup>13</sup>C NMR (101 MHz, CDCl<sub>3</sub>) δ = 204.9, 148.1, 146.2, 133.9, 124.4, 121.3, 120.8, 75.9, 75.6, 20.6 ppm.

### NMR Data of Product:

<sup>1</sup>H NMR (400 MHz, CDCl<sub>3</sub>) δ = 6.91-6.87 (m, 0.06H, 94%D), 6.82-6.70 (m, 0.45H, 65%D), 6.78-6.75 (m, 0.12H, 88%D), 4.70 (s, 2H), 4.68 (s, 2H), 2.27 (s, 3H) ppm.

<sup>13</sup>C NMR (101 MHz, CDCl<sub>3</sub>) δ = 205.0, 148.1, 146.2, 134.0-133.6 (1C), 124.5-123.8 (1C), 121.3, 121.0-120.4 (1C), 75.9, 75.6, 20.6-20.5 (1C) ppm.

### Mass Data:

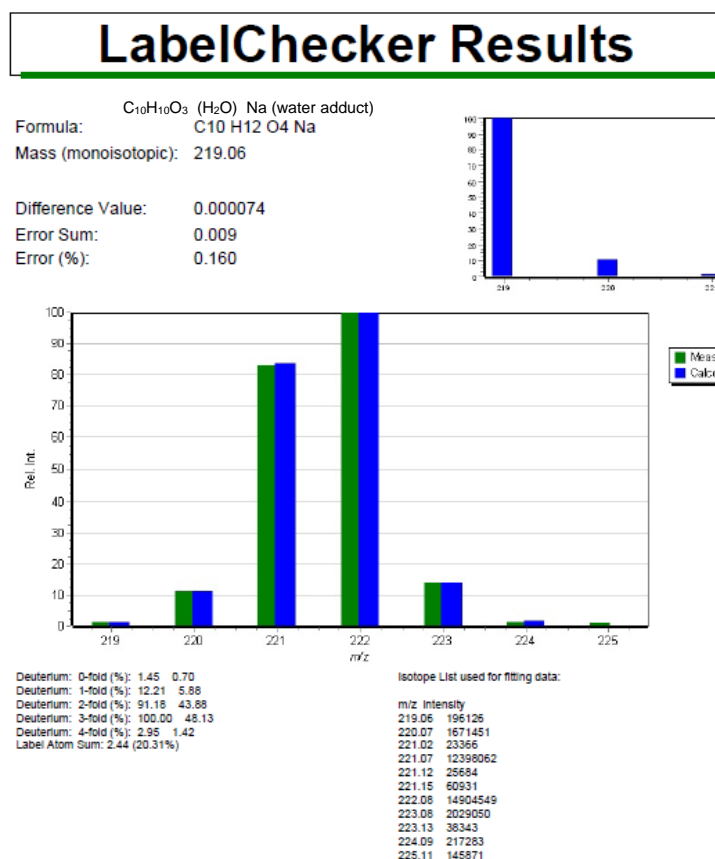

### <sup>1</sup>H-NMR spectrum in CDCl<sub>3</sub>:

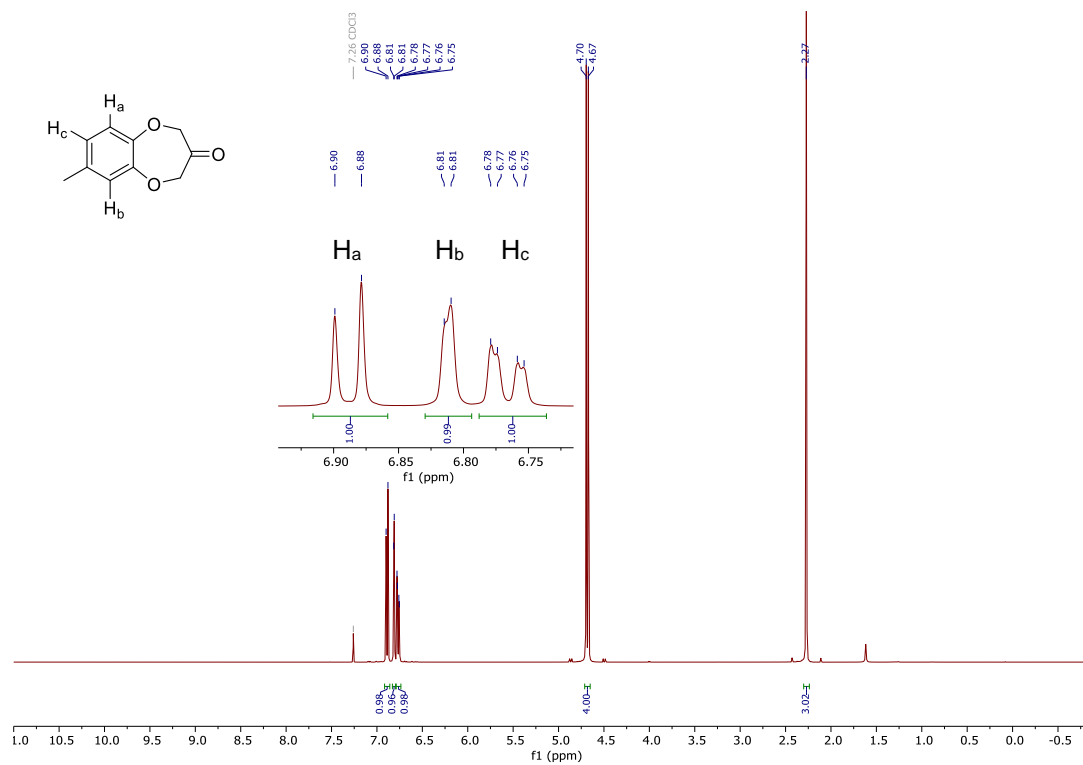

### <sup>1</sup>H-NMR spectrum in CDCl<sub>3</sub>:

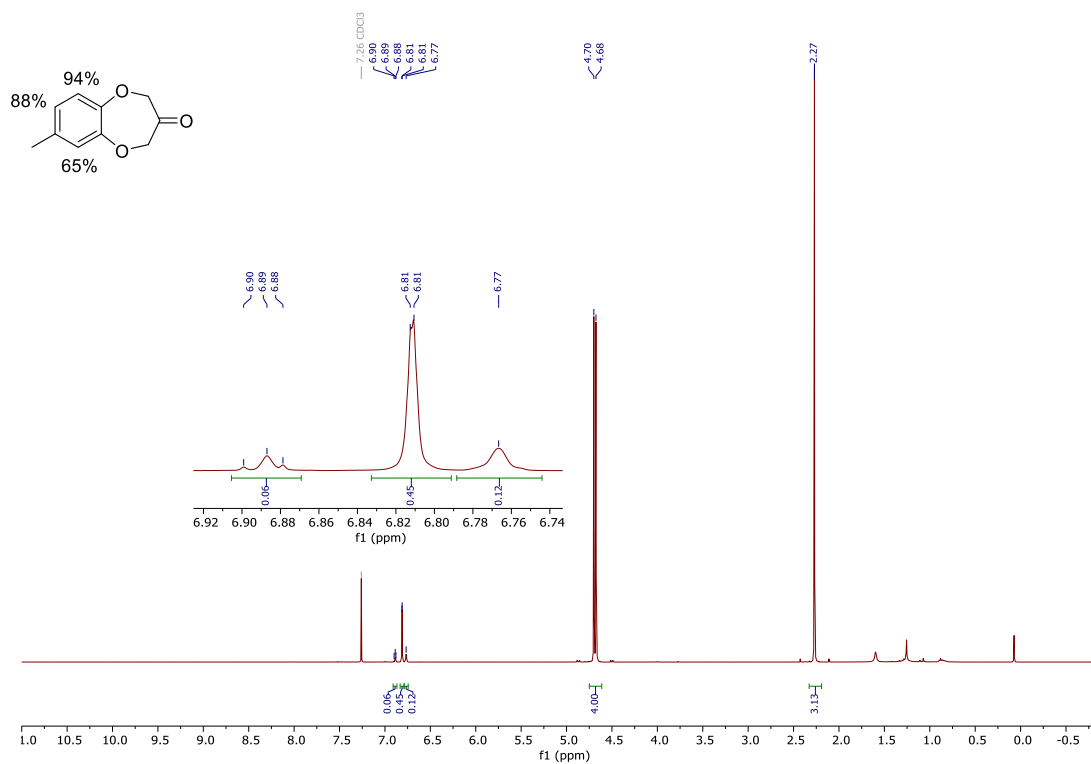

### <sup>13</sup>C-NMR spectrum in CDCl<sub>3</sub>:

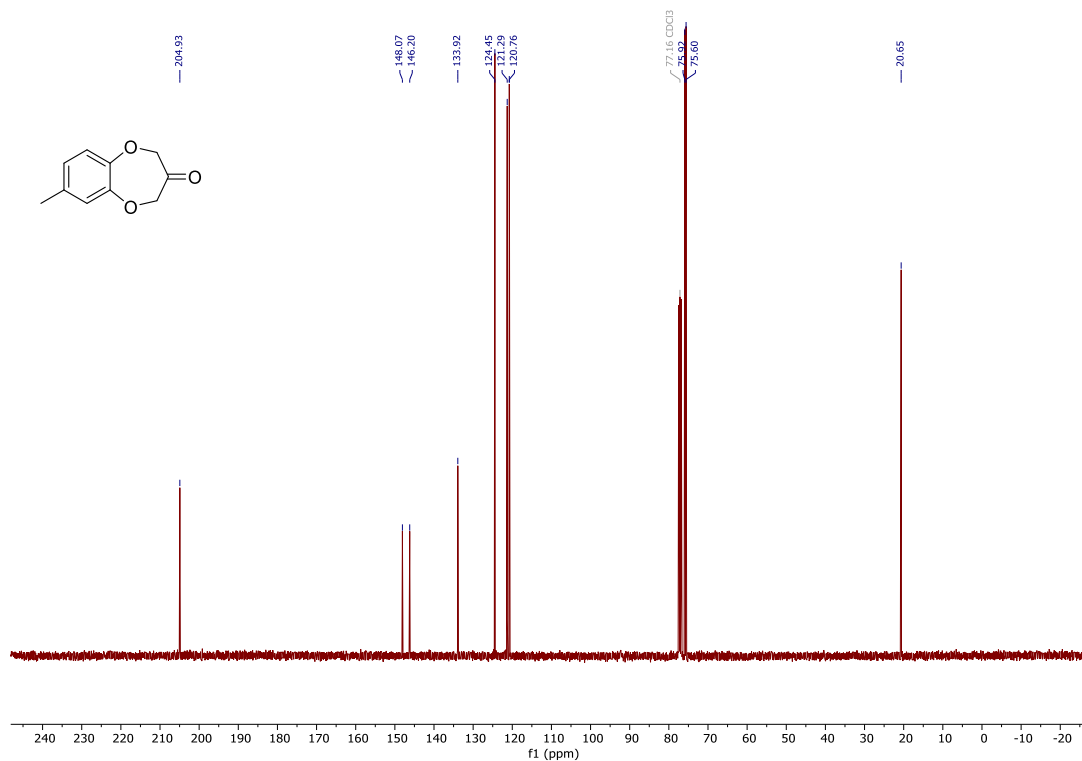

### <sup>13</sup>C-NMR spectrum in CDCl<sub>3</sub>:

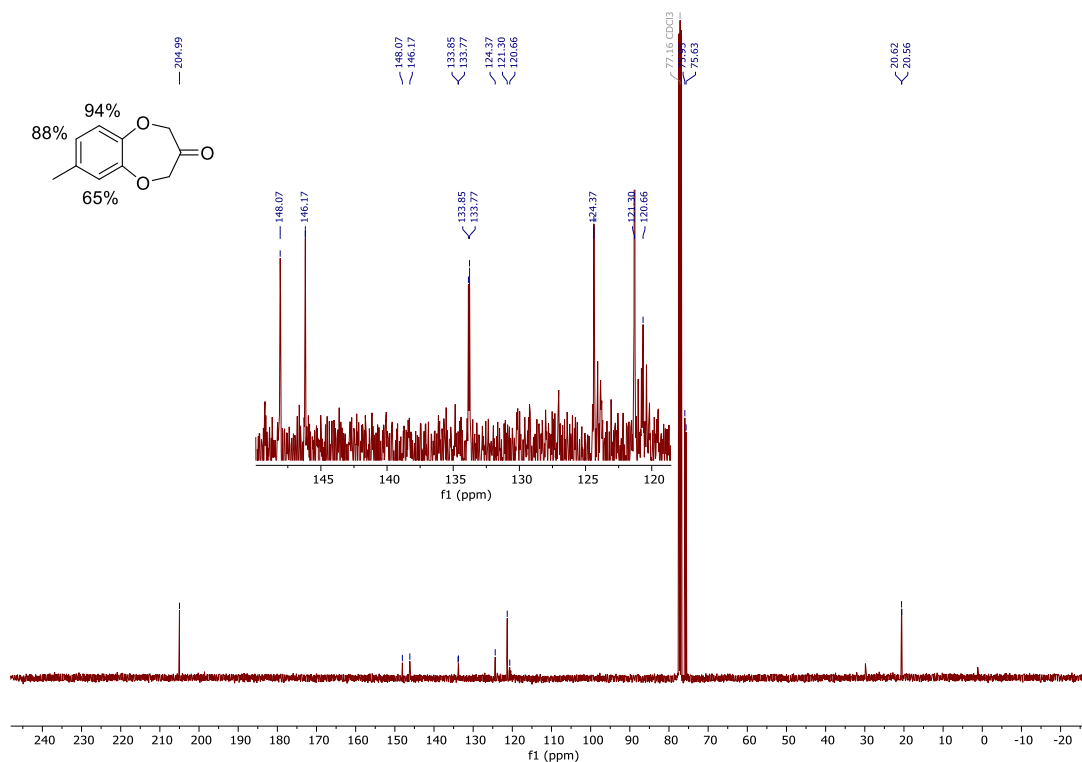

## Deuteration of 2,2-dimethyl-2,3-dihydrobenzofuran-7-yl methylcarbamate (**26**):

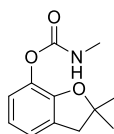

Following the general procedure E and using 2,2-dimethyl-2,3-dihydrobenzofuran-7-yl methylcarbamate (**26**) (44.3 mg, 0.200 mmol), and purification via silica gel column chromatography using pentane:EtOAc = 10:3 as the eluent, the target compound [**D**]**26** was obtained as a colorless solid (38.1 mg, 85%). The degree of deuteration was determined by mass spectrometry.

**Deuterium Incorporation:** 2.86 D/molecule [HRMS]; 2.86 D/molecule [<sup>1</sup>H-NMR].

### NMR Data of Starting Material:

<sup>1</sup>H NMR (400 MHz, CDCl<sub>3</sub>) δ = 6.97 (d, *J* = 7.8 Hz, 1H), 6.94 (d, *J* = 7.8 Hz, 1H), 6.78 (dd, *J* = 7.8, 7.8 Hz, 1H), 5.05 (br s, 1H)\*, 3.03 (s, 2H), 2.88 (d, *J* = 4.9 Hz, 3H)\*, 1.49 (s, 6H) ppm.

\*major rotamer peak reported

<sup>13</sup>C NMR (101 MHz, CDCl<sub>3</sub>) δ = 154.7, 150.3, 134.8, 129.5, 122.1, 121.9, 120.1, 88.2, 43.1, 28.2, 27.8 ppm.

### NMR Data of Product:

<sup>1</sup>H NMR (400 MHz, CDCl<sub>3</sub>) δ = 6.97 (s, 0.06H, 94% D), 6.94 (s, 0.04H, 96% D), 6.78 (s, 0.04H, 96% D), 5.05 (br. s, 1H)\*, 3.03 (s, 2H), 2.88 (d, *J* = 4.9 Hz, 3H)\*, 1.49 (s, 6H) ppm.

\*major rotamer peak reported

<sup>13</sup>C NMR (101 MHz, CDCl<sub>3</sub>) δ = 154.7, 150.3, 134.8, 129.5, 122.1-121.2 (2C), 120.2-119.3(1C), 88.2, 43.1, 28.2, 27.8 ppm.

### Mass Data:

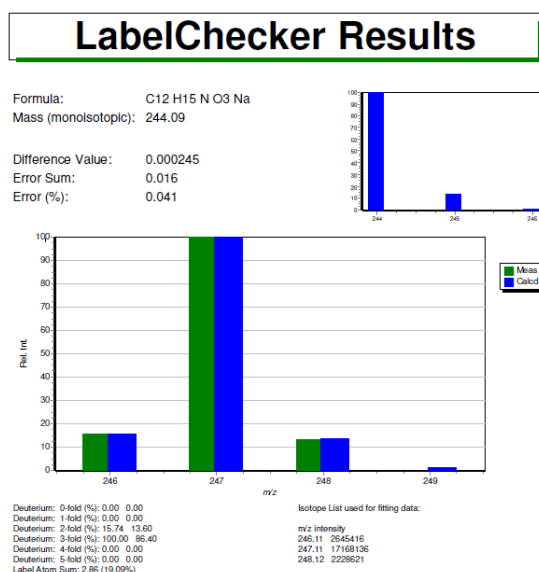

# <sup>1</sup>H-NMR spectrum in CDCl<sub>3</sub>:

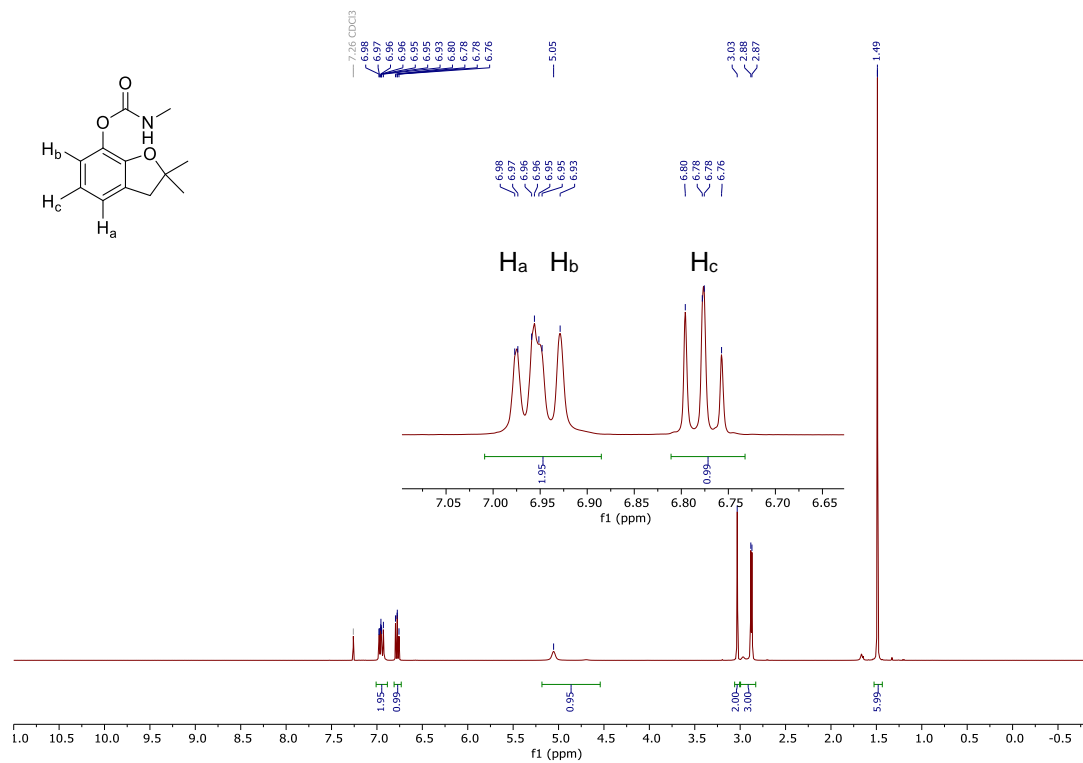

# <sup>1</sup>H-NMR spectrum in CDCl<sub>3</sub>:

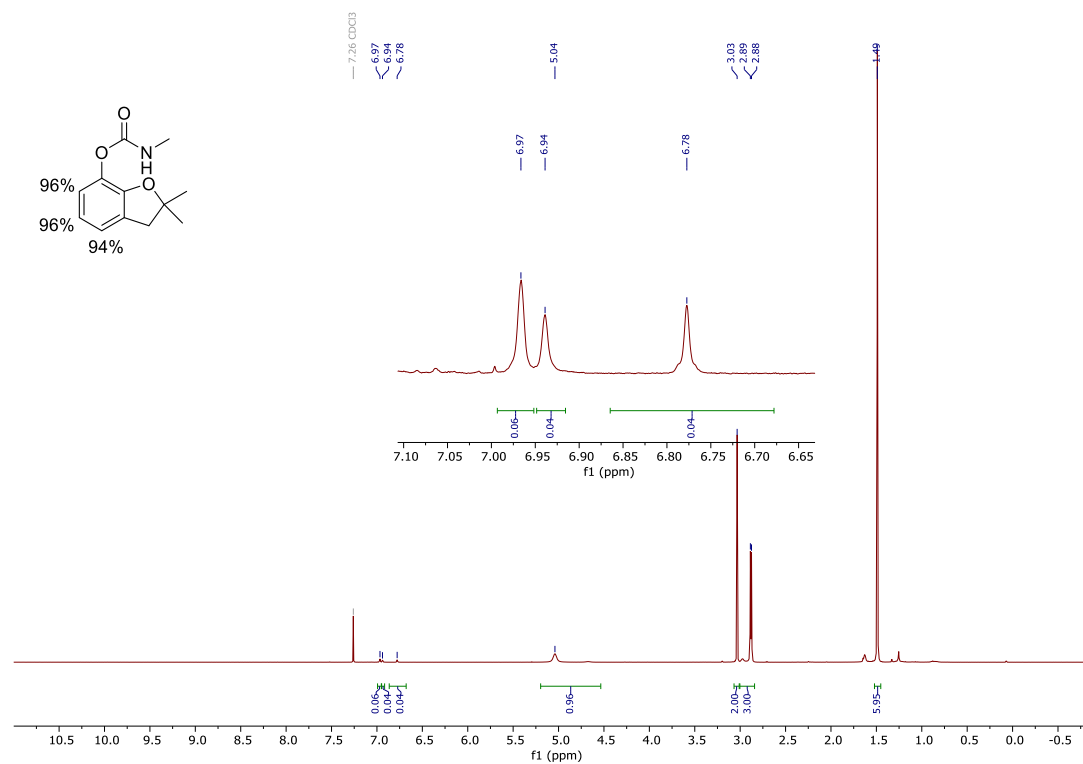

### <sup>13</sup>C-NMR spectrum in CDCl<sub>3</sub>:

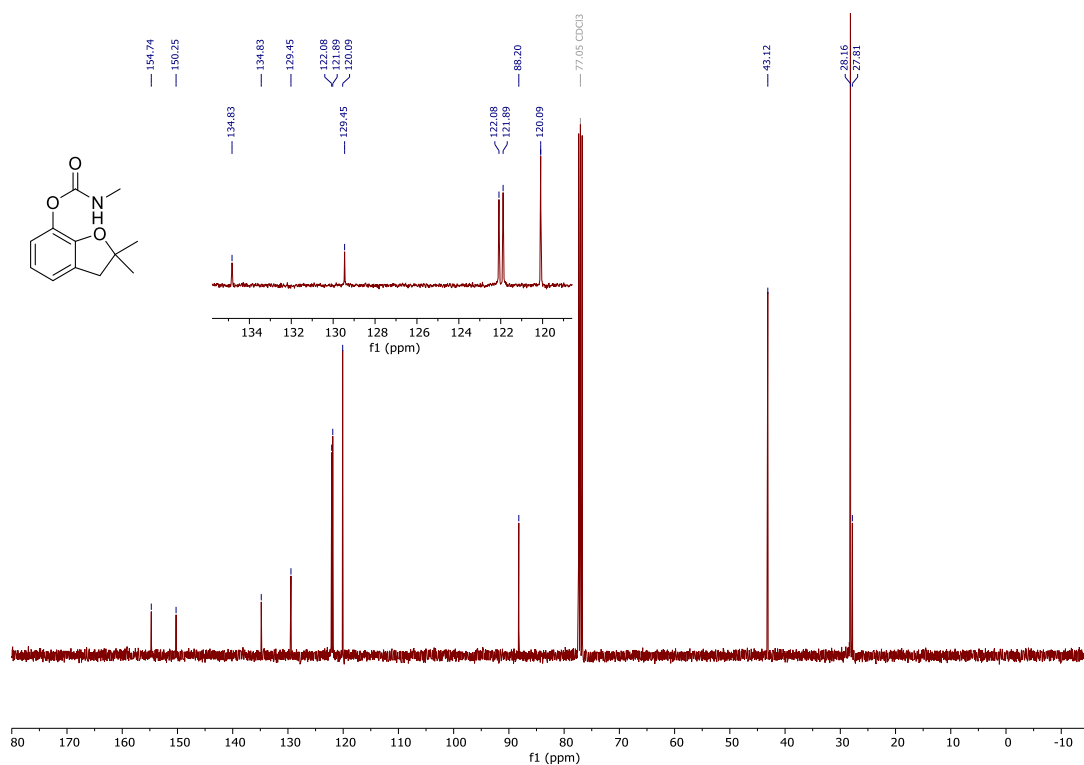

### <sup>13</sup>C-NMR spectrum in CDCl<sub>3</sub>:

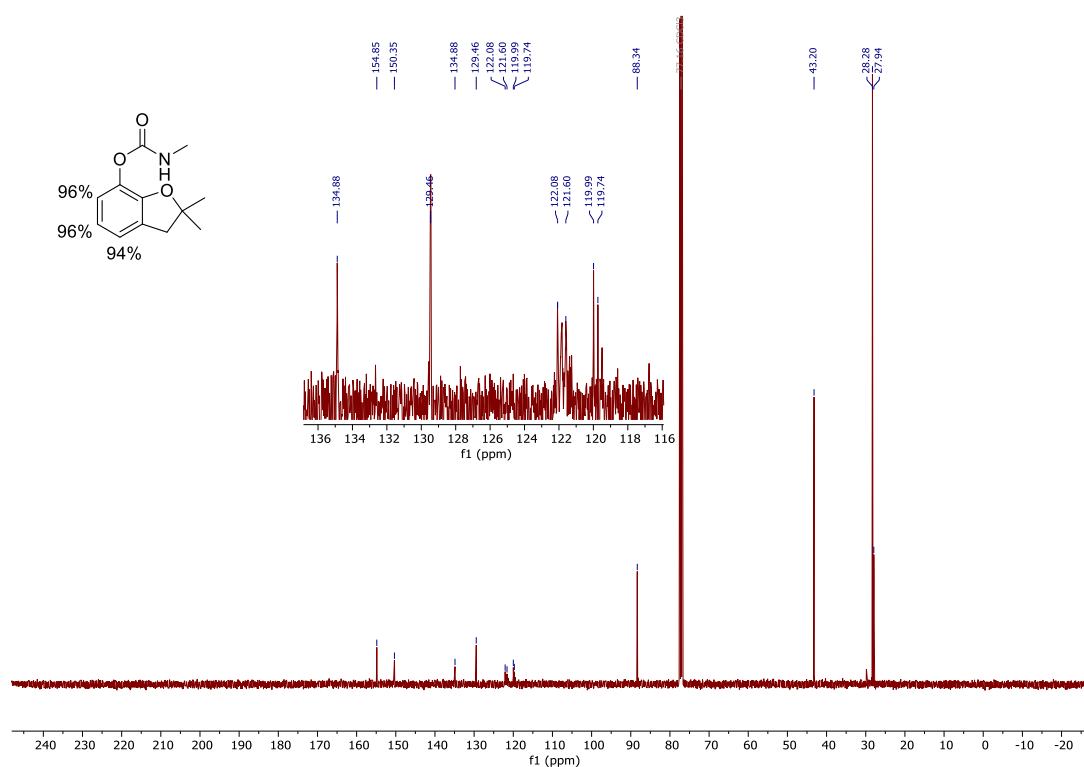



## Deuteration of methyl 2-(4-(2,2-dichlorocyclopropyl)phenoxy)-2-methylpropanoate (**27**):

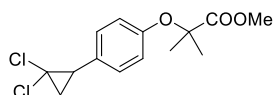

Following the general procedure E and using methyl 2-(4-(2,2-dichlorocyclopropyl)phenoxy)-2-methylpropanoate (**27**) (60.6 mg, 0.200 mmol), and purification via silica gel column chromatography using pentane:EtOAc = 3:1 as the eluent, the target compound [**D**]**27** was obtained as colorless solid (46.6 mg, 76%). The degree of deuteration was determined by mass spectrometry.

**Deuterium Incorporation:** 3.23 D/molecule [HRMS]; 3.24 D/molecule [<sup>1</sup>H-NMR].

### NMR Data of Starting Material:

<sup>1</sup>H NMR (600 MHz, CDCl<sub>3</sub>) δ = 7.11 (d, *J* = 8.5 Hz, 2H), 6.80 (d, *J* = 8.7 Hz, 2H), 3.76 (s, 3H), 2.83 (dd, *J* = 10.7, 8.4 Hz, 1H), 1.93 (dd, *J* = 10.7, 7.4 Hz, 1H), 1.77 (dd, *J* = 8.2, 7.5 Hz, 1H), 1.59 (s, 6H) ppm.

<sup>13</sup>C NMR (150 MHz, CDCl<sub>3</sub>) δ = 174.9, 155.0, 129.8, 128.4, 118.9, 79.3, 61.0, 52.6, 35.0, 26.0, 25.5(2), 25.5(0) ppm.

### NMR Data of Product:

<sup>1</sup>H NMR (400 MHz, CDCl<sub>3</sub>) δ = 7.11 (s, 0.66H, 67% D), 6.83-6.77 (m, 0.10H, 95% D), 3.76 (s, 3H), 2.83 (dd, *J* = 10.6, 8.4 Hz, 1H), 1.93 (dd, *J* = 10.7, 7.4 Hz, 1H), 1.82-1.71 (m, 1H), 1.59 (s, 6H) ppm.

<sup>13</sup>C NMR (100 MHz, CDCl<sub>3</sub>) δ = 174.9, 154.9, 130.3-127.9 (3C), 119.2-117.9 (2C), 79.3, 61.0, 52.6, 35.1-34.7 (1C), 26.0, 25.5(0), 25.4(9) ppm.

### Mass Data:

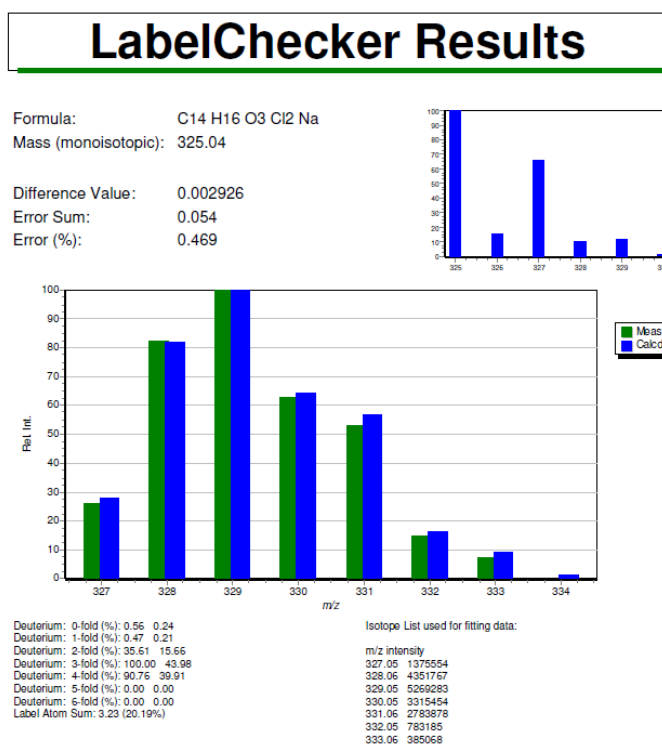

### <sup>1</sup>H-NMR spectrum in CDCl<sub>3</sub>:

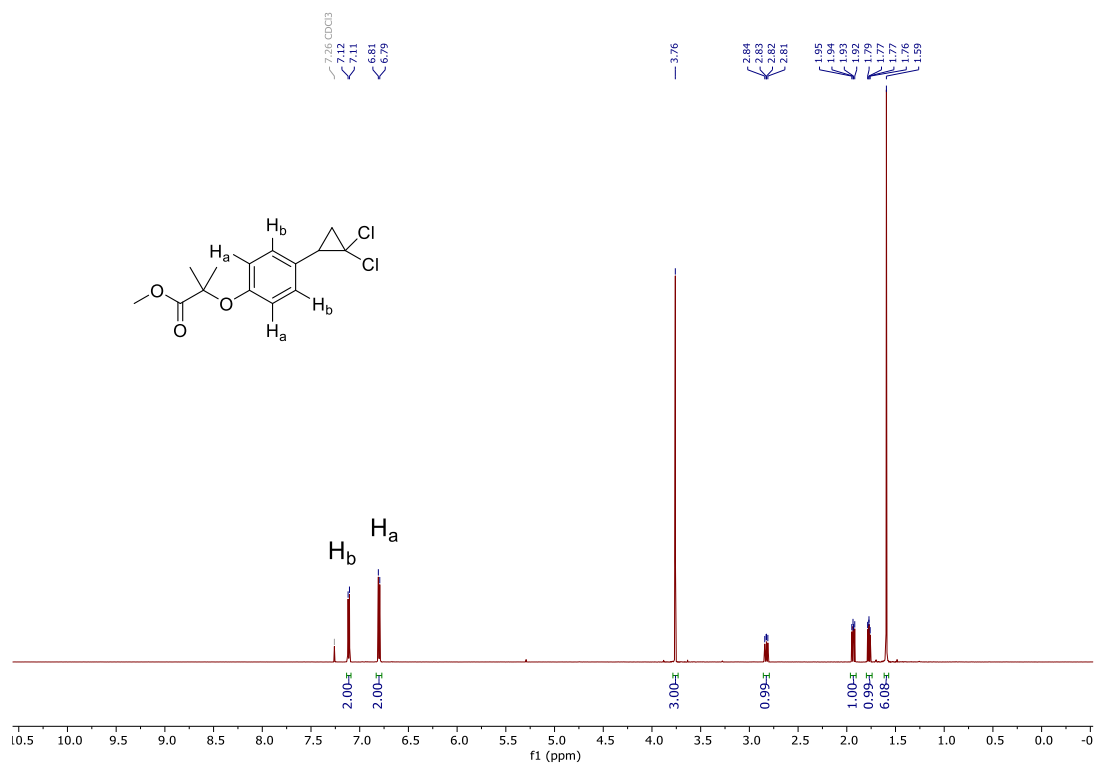

### <sup>1</sup>H-NMR spectrum in CDCl<sub>3</sub>:

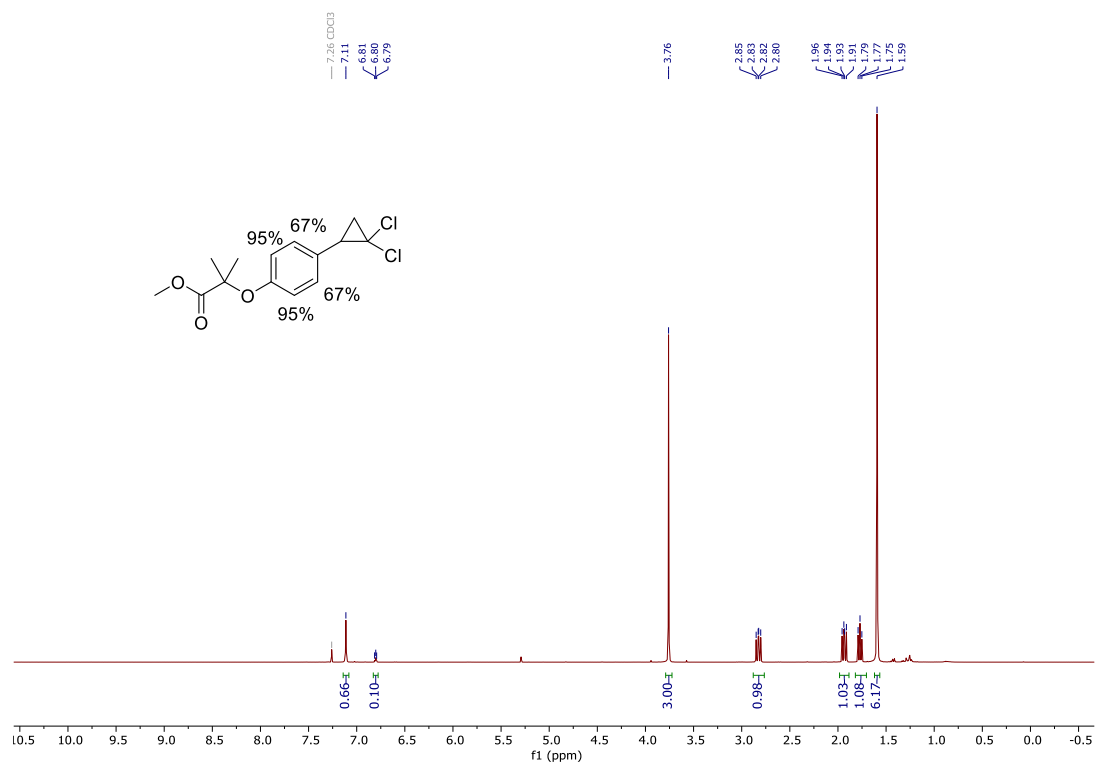

### <sup>13</sup>C-NMR spectrum in CDCl<sub>3</sub>:

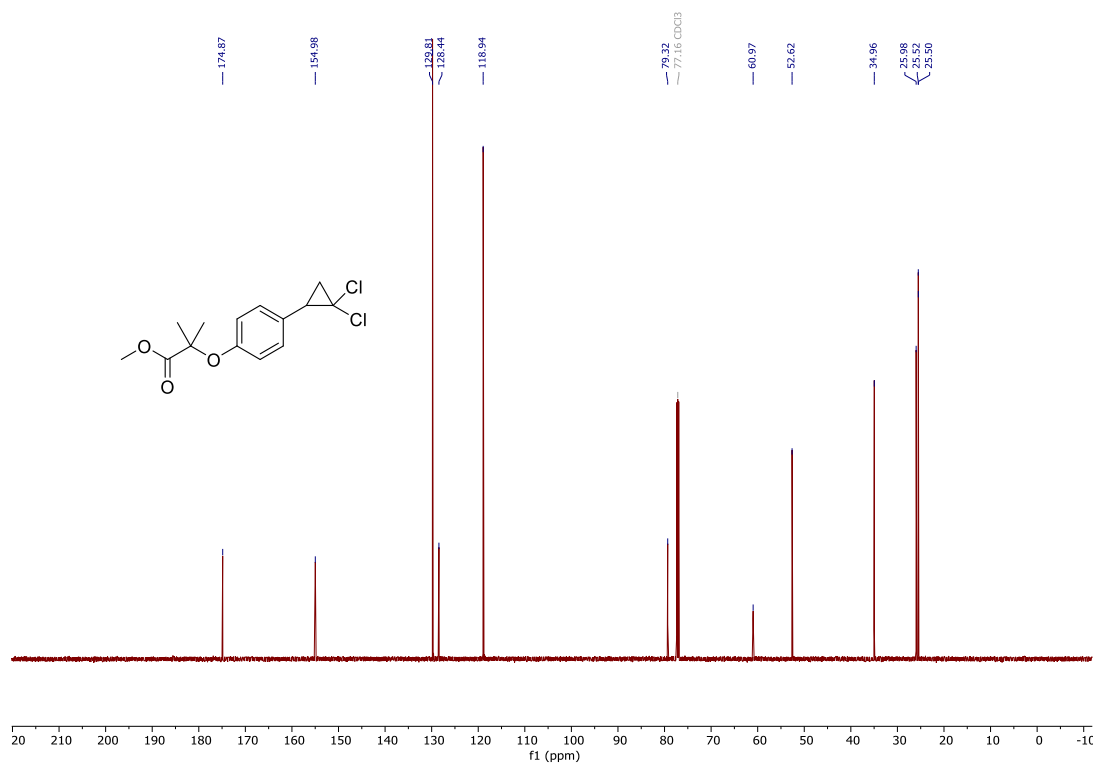

### <sup>13</sup>C-NMR spectrum in CDCl<sub>3</sub>:

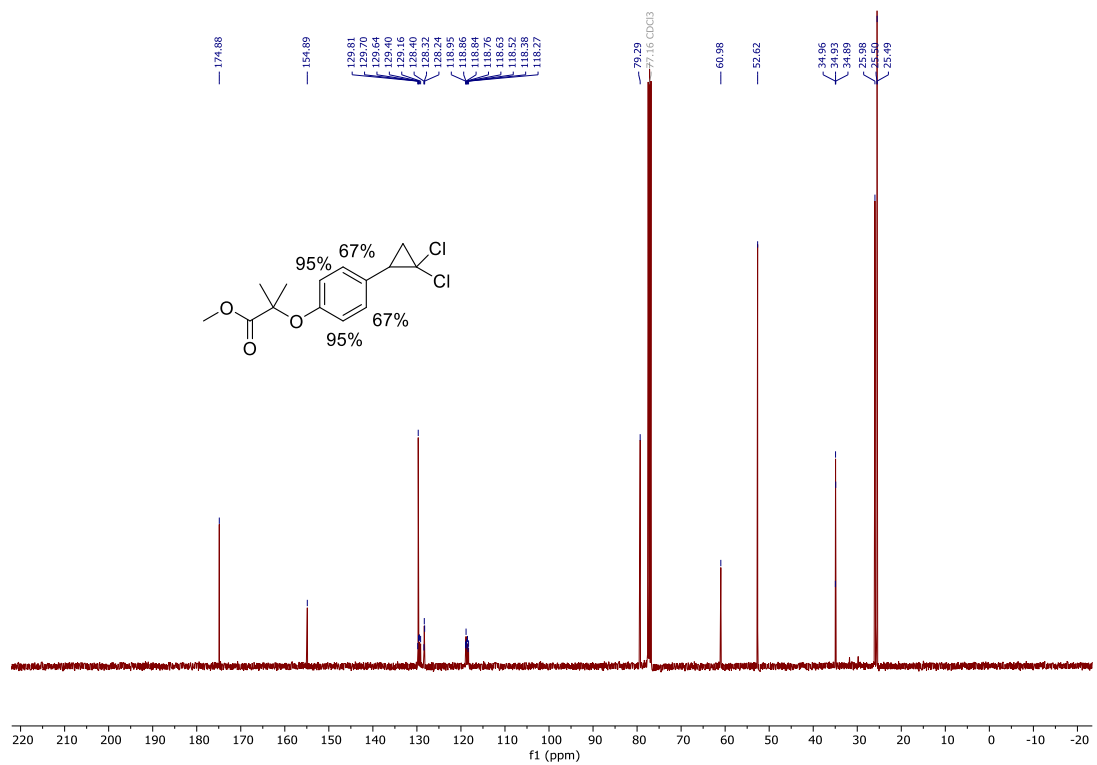

## Deuteration of ethyl 2-(4-chlorophenoxy)-2-methylpropanoate (**28**):

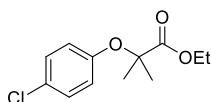

Following the general procedure E and using ethyl 2-(4-chlorophenoxy)-2-methylpropanoate (**28**) (48.5 mg, 0.200 mmol), and purification via silica gel column chromatography using pentane:EtOAc = 5:1 as the eluent, the target compound [**D**]**28** was obtained as yellowish liquid (29.6 mg, 60%). The degree of deuteration was determined by mass spectrometry.

**Deuterium Incorporation:** 3.71 D/molecule [HRMS]; 3.76 D/molecule [<sup>1</sup>H-NMR].

### NMR Data of Starting Material:

<sup>1</sup>H NMR (500 MHz, CDCl<sub>3</sub>) δ = 7.20-7.15 (m, 2H), 6.79-6.76 (m, 2H), 4.24-4.18 (m, 2H), 1.58-1.54 (m, 6H), 1.25-1.20 (m, 3H) ppm.

<sup>13</sup>C NMR (125 MHz, CDCl<sub>3</sub>) δ = 174.0, 154.2, 129.2, 127.3, 120.6, 79.6, 61.6, 25.4, 14.1 ppm.

### NMR Data of Product:

<sup>1</sup>H NMR (400 MHz, CDCl<sub>3</sub>) δ = 7.19 (s, 0.15H, 93% D), 6.78 (s, 0.09H, 96% D), 4.23 (q, *J* = 7.1 Hz, 2H), 1.58 (s, 6H), 1.24 (t, *J* = 7.1 Hz, 3H) ppm.

<sup>13</sup>C NMR (150 MHz, CDCl<sub>3</sub>) δ = 174.1, 154.1, 129.4-128.3 (2C), 127.7-126.6 (2C), 121.0-119.5 (1C), 79.6, 61.7, 25.4, 14.2 ppm.

### Mass Data:

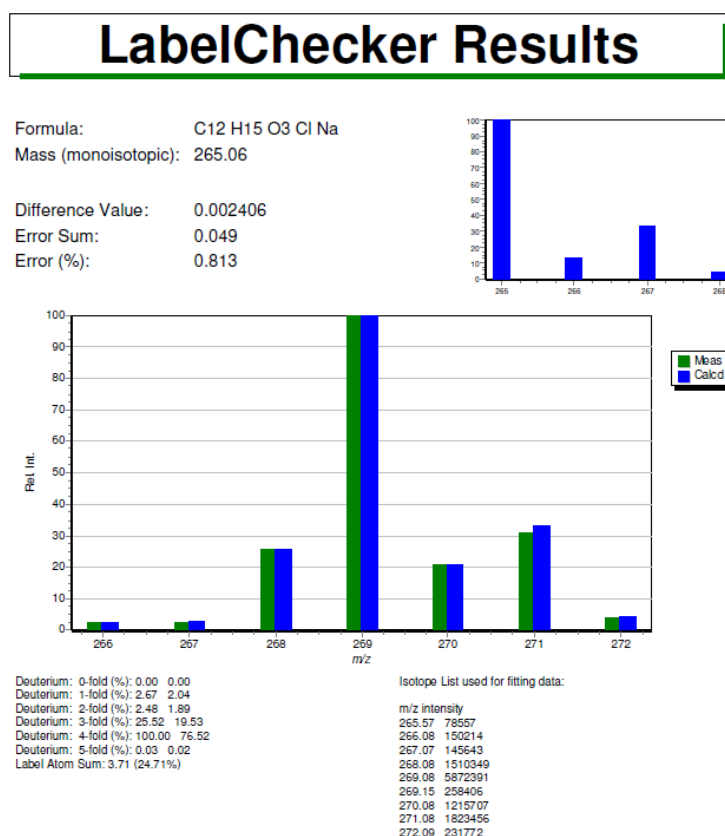

### <sup>1</sup>H-NMR spectrum in CDCl<sub>3</sub>:

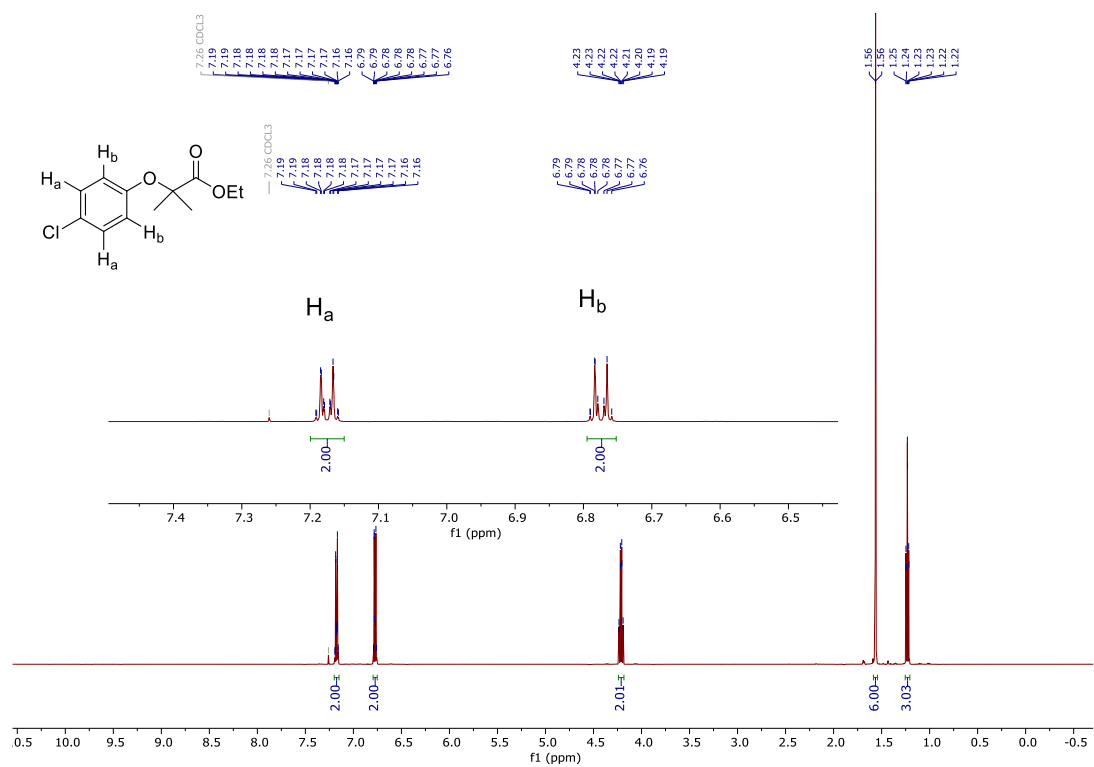

### <sup>1</sup>H-NMR spectrum in CDCl<sub>3</sub>:

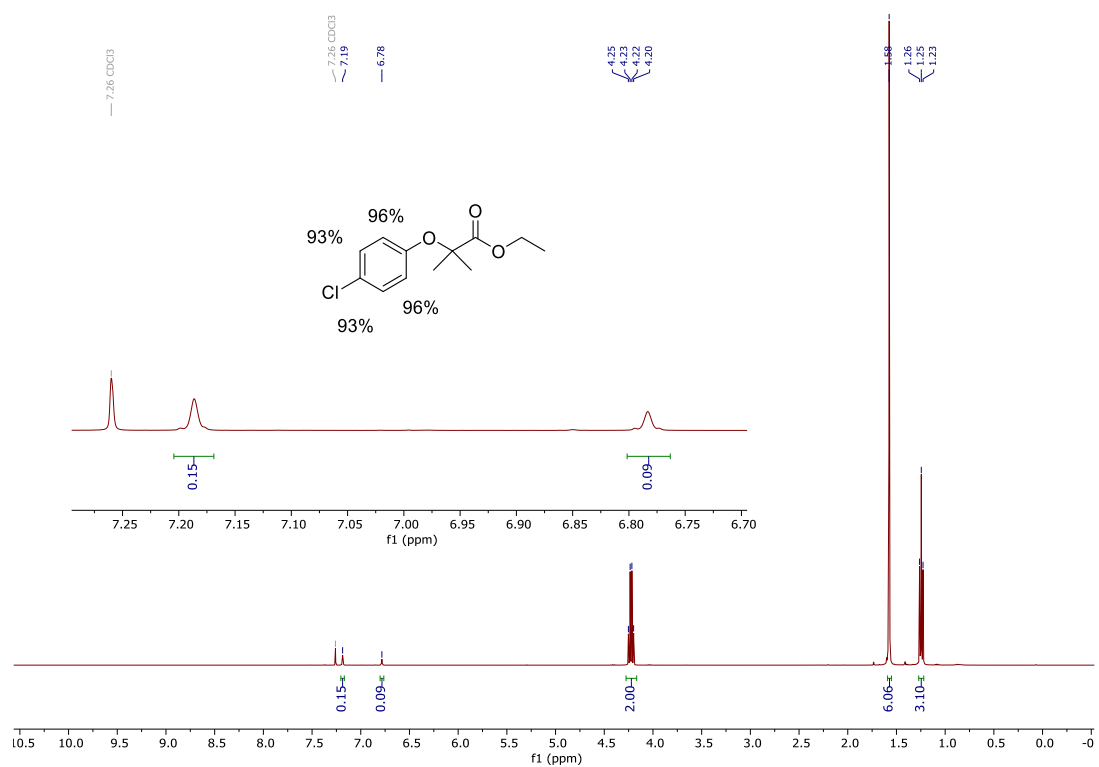

### <sup>13</sup>C-NMR spectrum in CDCl<sub>3</sub>:

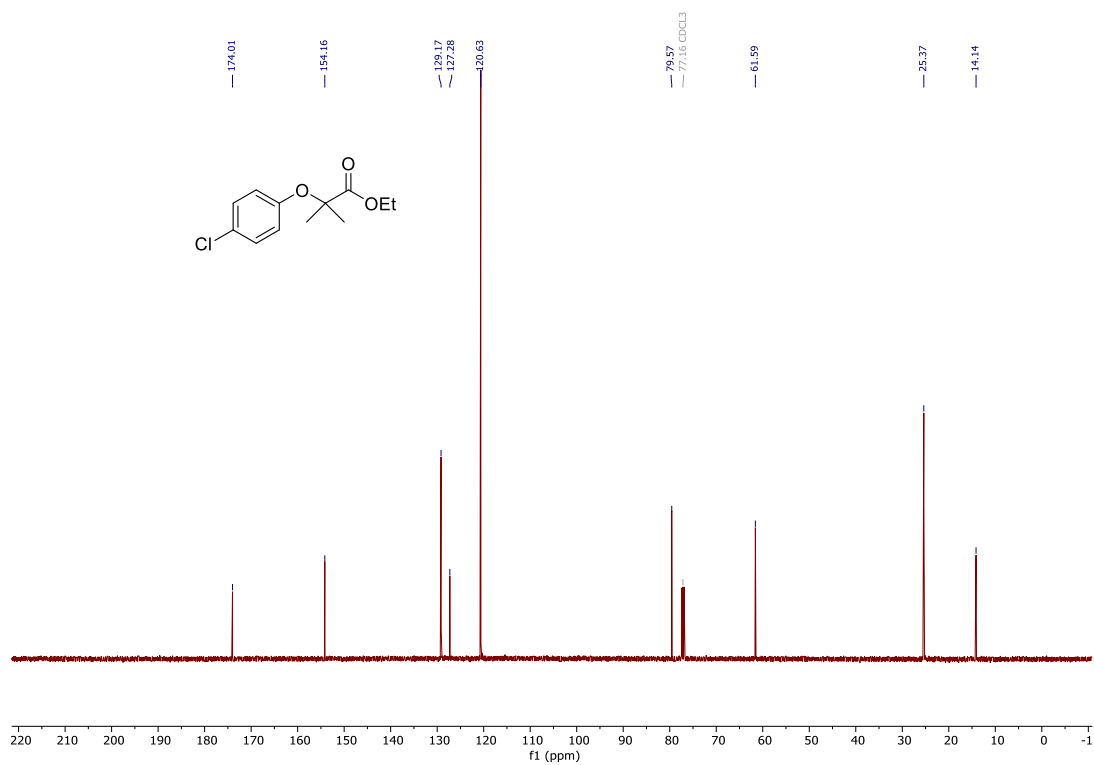

### <sup>13</sup>C-NMR spectrum in CDCl<sub>3</sub>:

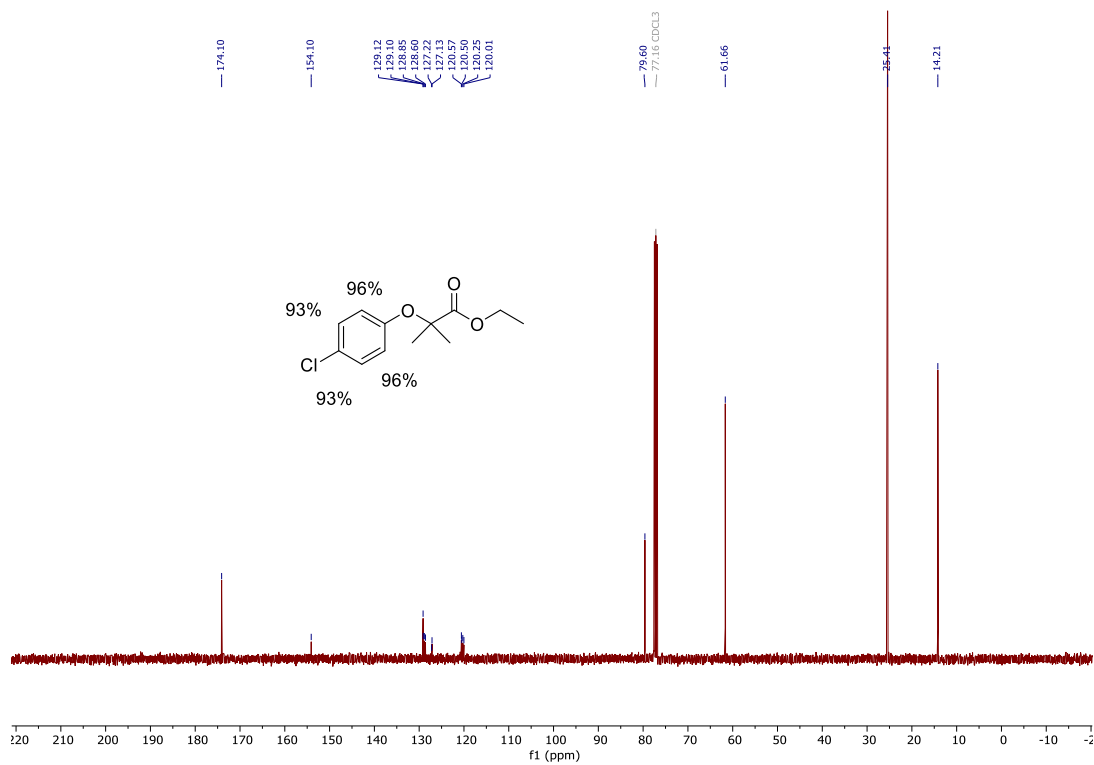

## Deuteration of methyl 2-(4-(2-(4-chlorobenzamido)ethyl)phenoxy)-2-methylpropanoate (**29**) Using Conditions A:

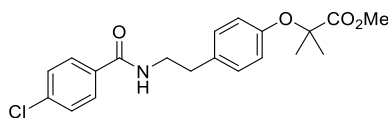

Following the general procedure E and using methyl 2-(4-(2-(4-chlorobenzamido)ethyl)phenoxy)-2-methylpropanoate (**29**) (75.2 mg, 0.200 mmol), and purification via silica gel column chromatography using CH<sub>2</sub>Cl<sub>2</sub>:MeOH = 99:1 as the eluent, the target compound [**D**]**29** was obtained as colorless liquid (75.0 mg, 99%). The degree of deuteration was determined by mass spectrometry.

**Deuterium Incorporation:** 1.77 D/molecule [HRMS]; 1.69 D/molecule [<sup>1</sup>H-NMR].

### NMR Data of Starting Material:

<sup>1</sup>H NMR (600 MHz, CDCl<sub>3</sub>) δ = 7.62-7.59 (m, 2H), 7.39-7.35 (m, 2H), 7.11-7.07 (m, 2H), 6.81-6.78 (m, 2H), 3.77 (s, 3H), 3.68-3.63 (m, 2H), 2.86 (t, *J* = 6.9 Hz, 2H), 1.58 (s, 6H) ppm.

<sup>13</sup>C NMR (126 MHz, CDCl<sub>3</sub>): δ = 174.9, 166.5, 154.2, 137.8, 133.1, 132.6, 129.7, 129.0, 128.4, 119.7, 79.3, 52.6, 41.3, 34.9, 25.5 ppm.

### NMR Data of Product:

<sup>1</sup>H NMR (600 MHz, CDCl<sub>3</sub>) δ = 7.62-7.59 (m, 2H), 7.39-7.36 (m, 1.87H, 6.5% D), 7.11-7.07 (m, 1.62H, 19% D), 6.81-6.78 (m, 0.82H, 59% D), 3.77 (s, 3H), 3.69-3.63 (m, 2H), 2.86 (t, *J* = 6.9 Hz, 2H), 1.59 (s, 6H) ppm.

<sup>13</sup>C NMR (126 MHz, CDCl<sub>3</sub>) δ = 174.9, 166.5, 154.2, 137.8, 133.1-128.3(8C), 119.8-119.7 (2C), 79.3, 52.6, 41.3-41.2(1C), 34.9-34.8(1C), 25.5 ppm.

### Mass Data:

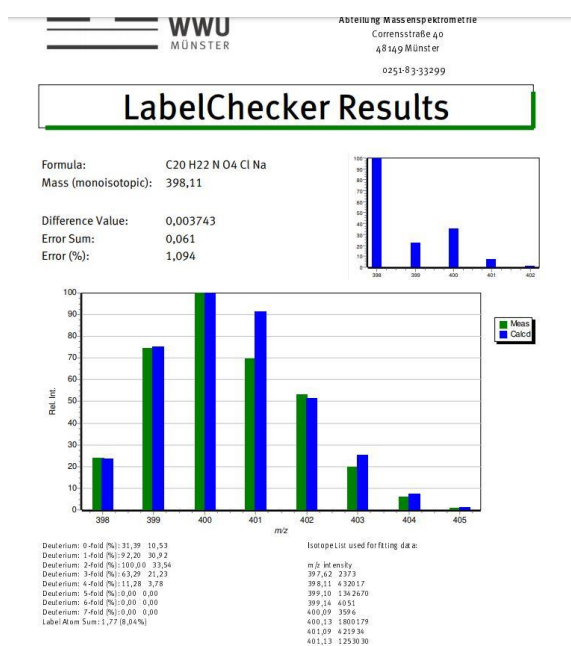

# <sup>1</sup>H-NMR spectrum in CDCl<sub>3</sub>:

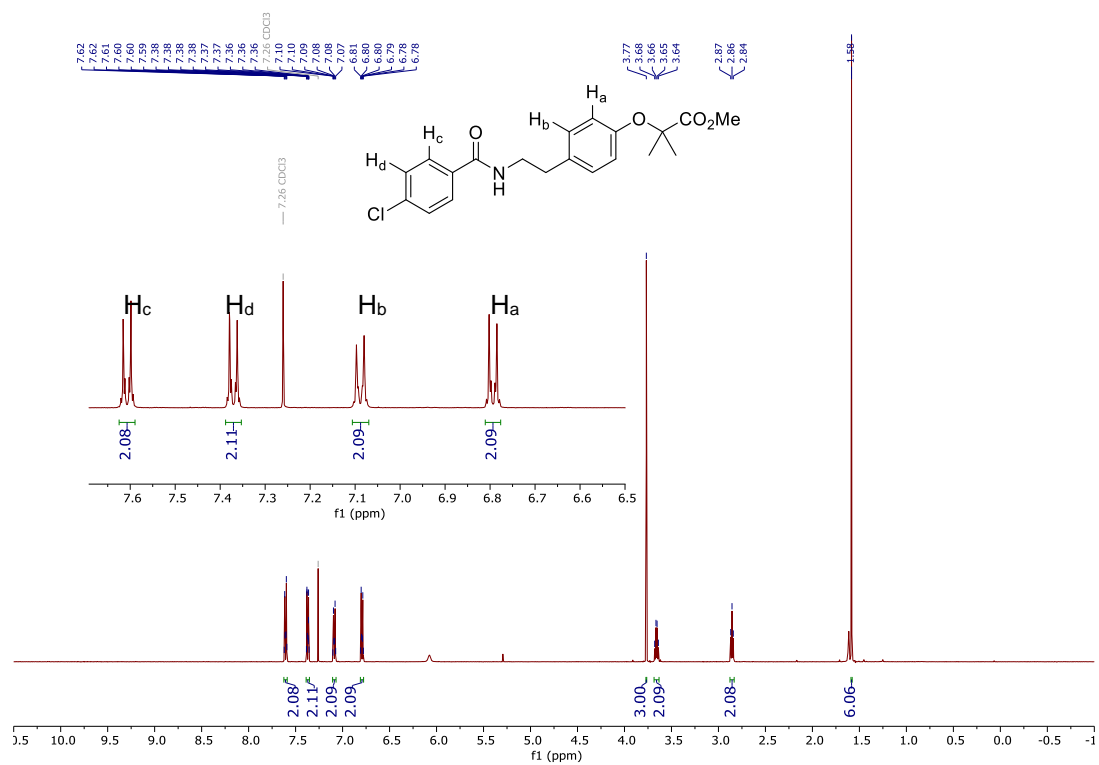

# <sup>1</sup>H-NMR spectrum in CDCl<sub>3</sub>:

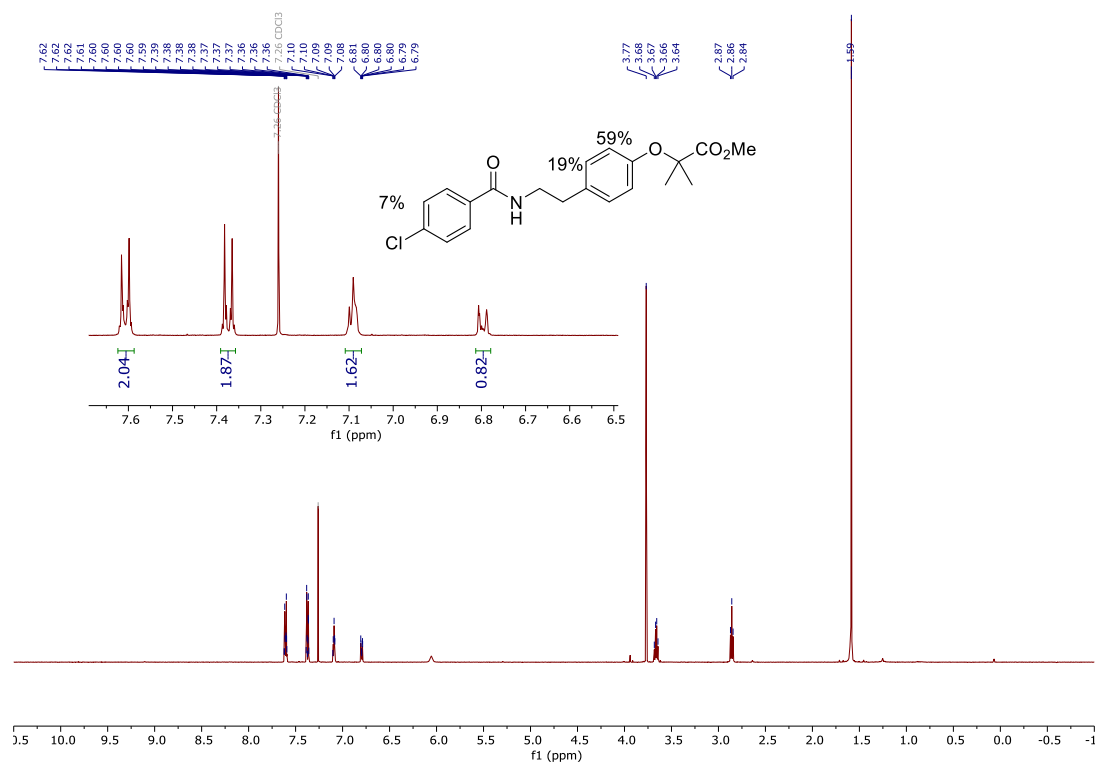



### <sup>13</sup>C-NMR spectrum in CDCl<sub>3</sub>:

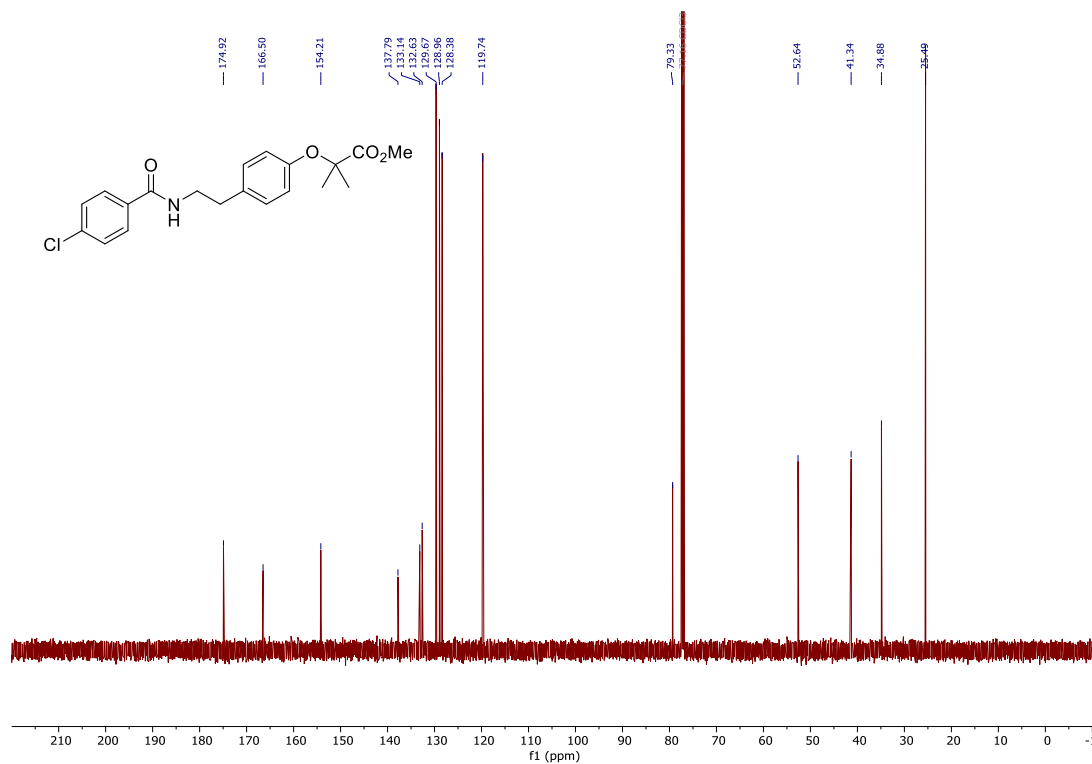

### <sup>13</sup>C-NMR spectrum in CDCl<sub>3</sub>:

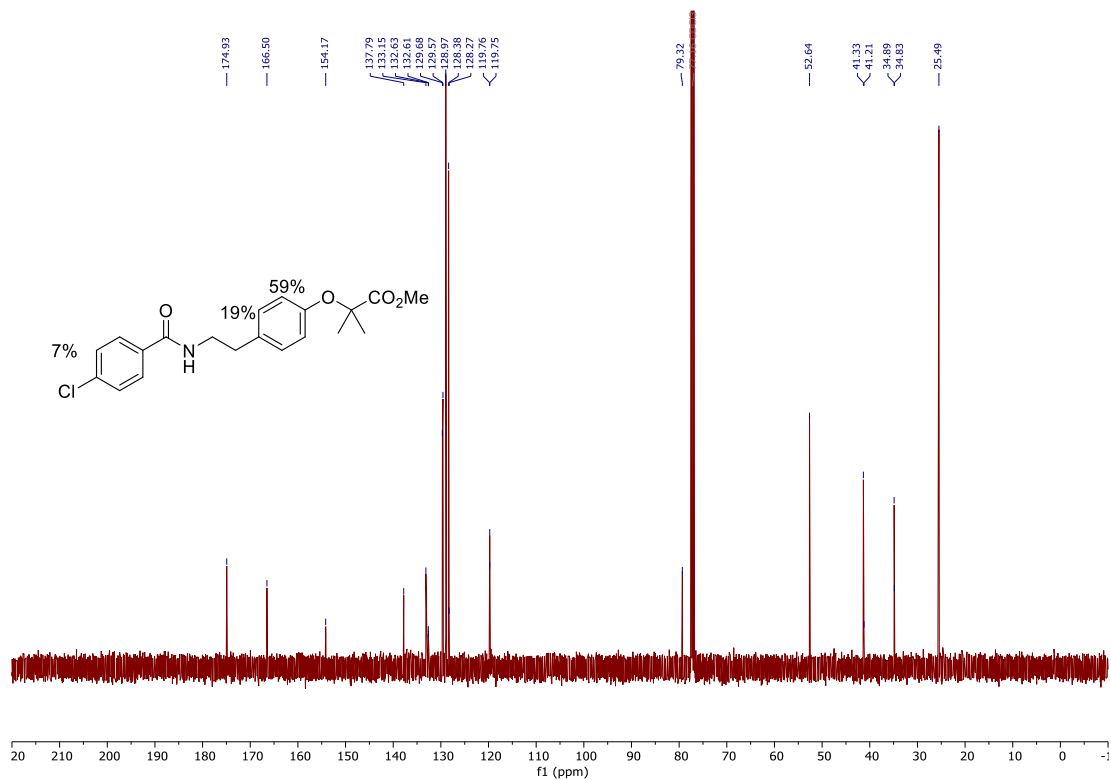

## Deuteration of methyl 2-(4-(2-(4-chlorobenzamido)ethyl)phenoxy)-2-methylpropanoate (**29**) Using Conditions B:

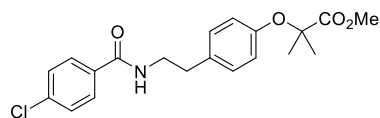

Following the general procedure F and using methyl 2-(4-(2-(4-chlorobenzamido)ethyl)phenoxy)-2-methylpropanoate (**29**) (75.2 mg, 0.200 mmol), and purification via silica gel column chromatography using CH<sub>2</sub>Cl<sub>2</sub>:MeOH = 99:1 as the eluent, the target compound [**D**]**29** was obtained as colorless liquid (74.8 mg, 98%). The degree of deuteration was determined by mass spectrometry.

**Deuterium Incorporation:** 5.96 D/molecule [HRMS]; 5.79 D/molecule [<sup>1</sup>H-NMR].

### NMR Data of Starting Material:

<sup>1</sup>H NMR (600 MHz, CDCl<sub>3</sub>) δ = 7.62-7.59 (m, 2H), 7.39-7.35 (m, 2H), 7.11-7.07 (m, 2H), 6.81-6.78 (m, 2H), 3.77 (s, 3H), 3.68-3.63 (m, 2H), 2.86 (t, *J* = 6.9 Hz, 2H), 1.58 (s, 6H) ppm.

<sup>13</sup>C NMR (126 MHz, CDCl<sub>3</sub>) δ = 174.9, 166.5, 154.2, 137.8, 133.1, 132.6, 129.7, 129.0, 128.4, 119.7, 79.3, 52.6, 41.3, 34.9, 25.5 ppm.

### NMR Data of Product:

<sup>1</sup>H NMR (600 MHz, CDCl<sub>3</sub>) δ = 7.62-7.58 (m, 1.24H, 38% D), 7.38-7.35 (m, 0.39H, 80.5% D), 7.10-7.07 (m, 0.23H, 88.5%), 6.82-6.76 (m, 0.35H, 82.5%D), 3.77 (s, 3H), 3.68-3.63 (m, 2H), 2.86 (t, *J* = 6.9 Hz, 2H), 1.58 (s, 6H) ppm.

<sup>13</sup>C NMR (126 MHz, CDCl<sub>3</sub>) δ = 174.9, 166.5, 154.1, 137.7-137.6 (1C), 133.1-128.3(8C), 120.1-118.7 (2C), 79.3, 52.6, 41.3-41.2(1C), 34.8-34.7(1C), 25.5 ppm.

### Mass Data:

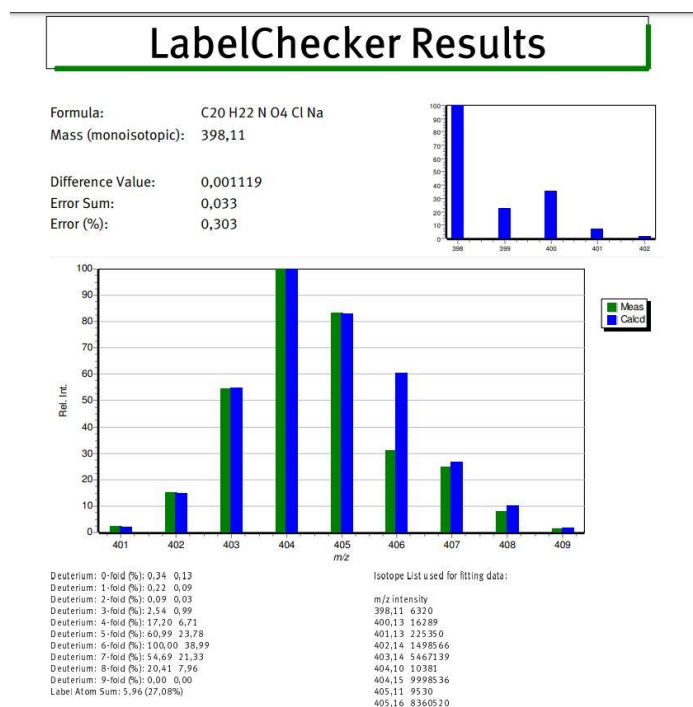

# <sup>1</sup>H-NMR spectrum in CDCl<sub>3</sub>:

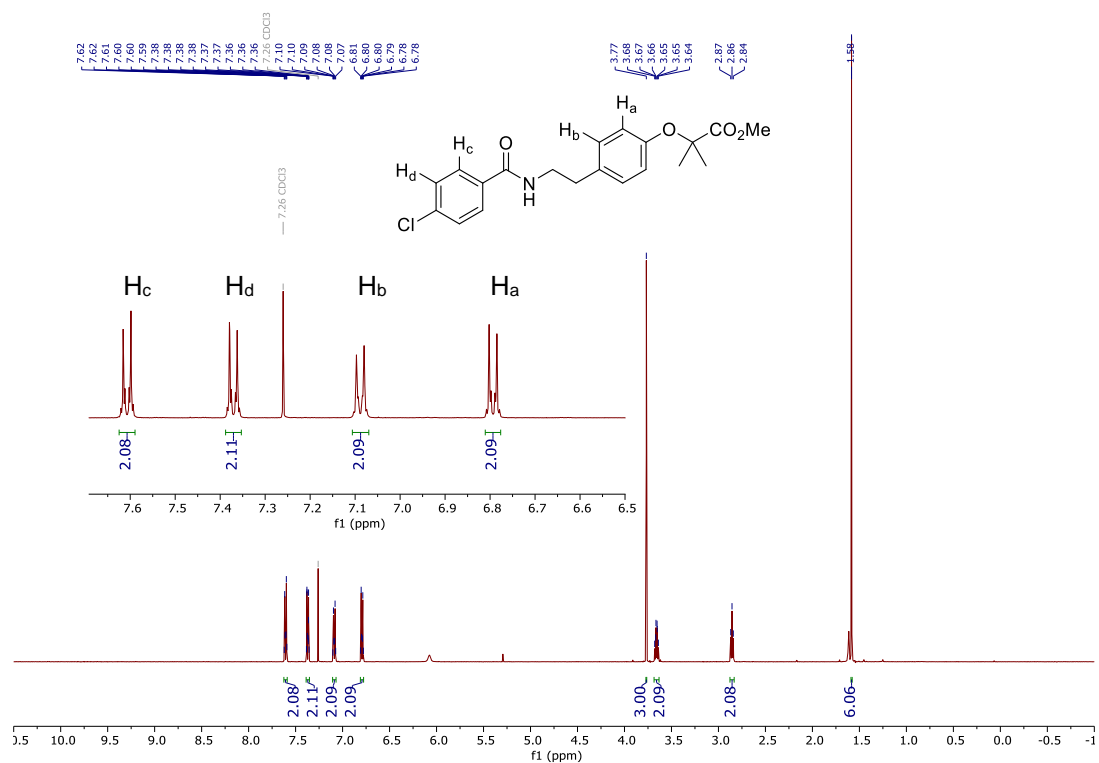

# <sup>1</sup>H-NMR spectrum in CDCl<sub>3</sub>:

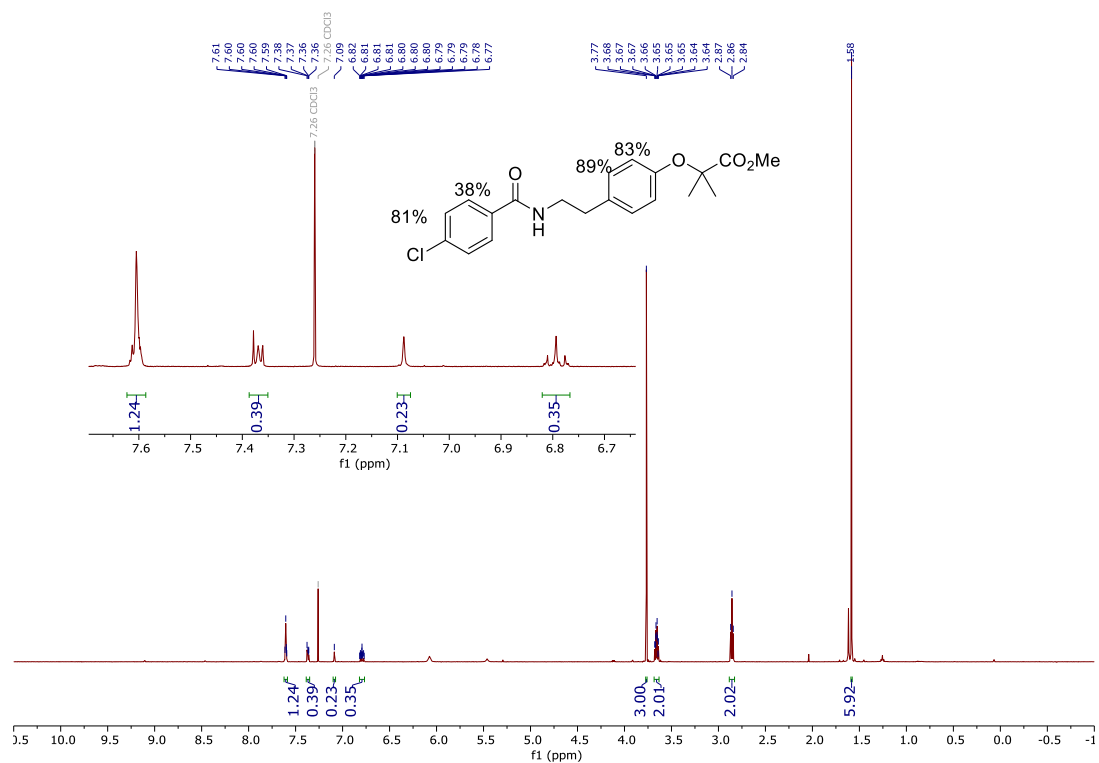

**<sup>13</sup>C-NMR spectrum in CDCl<sub>3</sub>:**

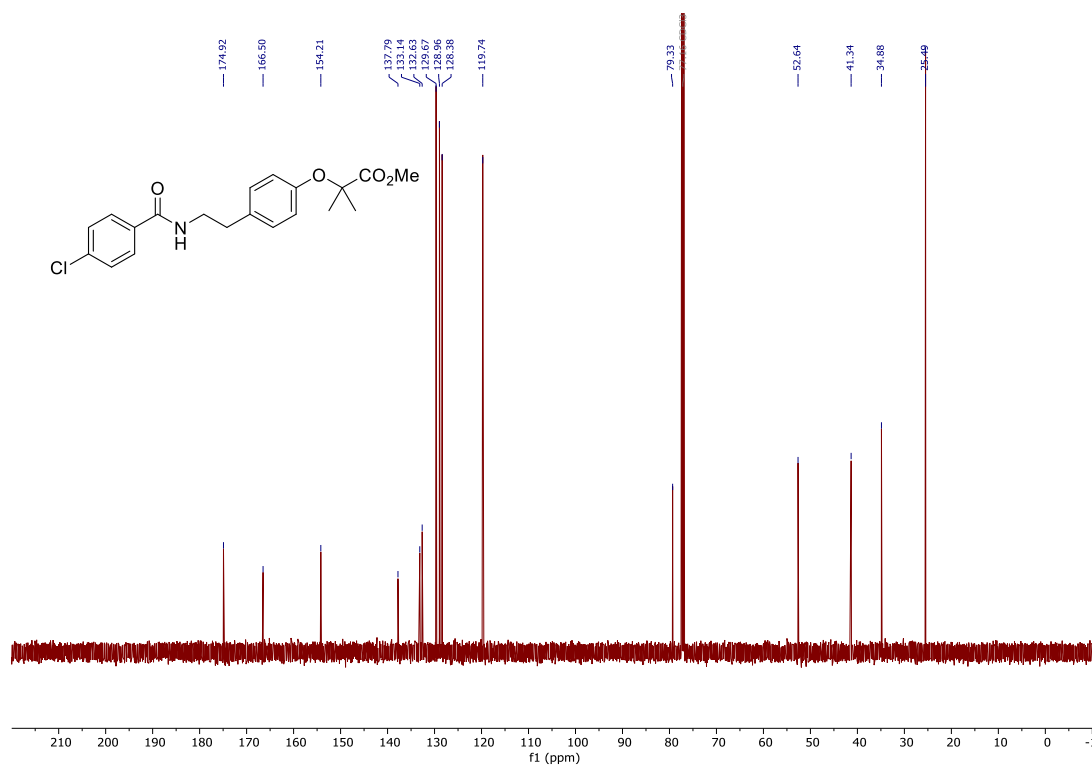

**<sup>13</sup>C-NMR spectrum in CDCl<sub>3</sub>:**

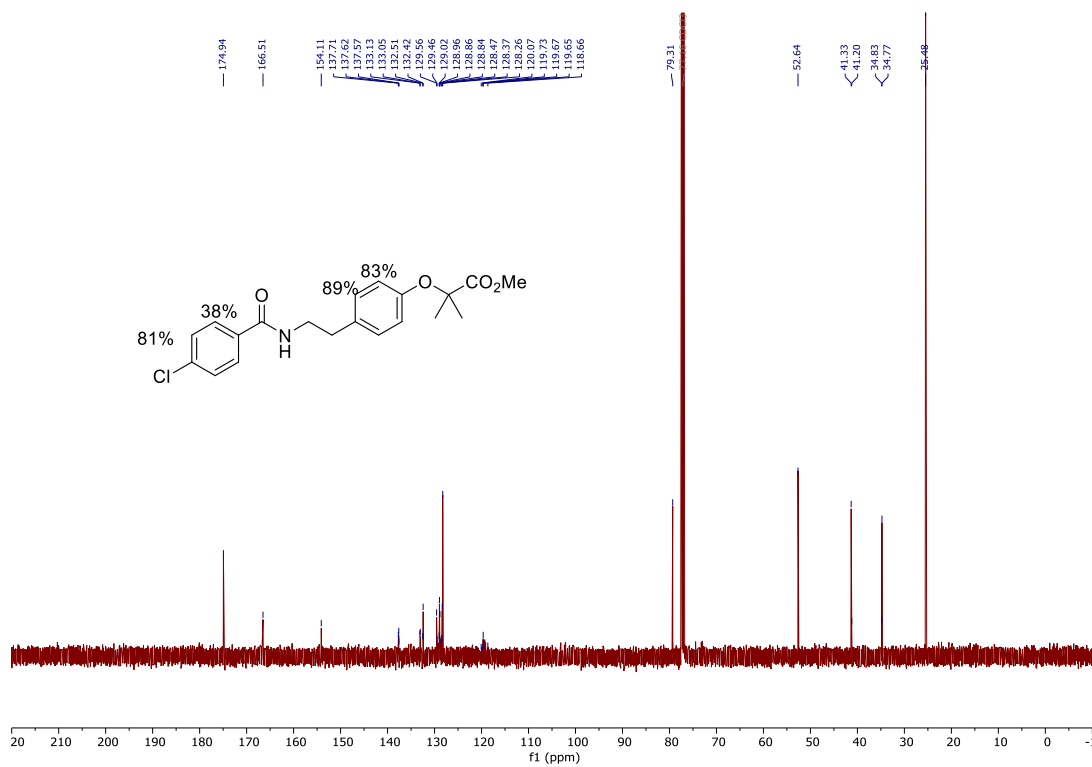

## Deuteration of isopropyl 2-(4-(4-chlorobenzoyl)phenoxy)-2-methylpropanoate (**30**) Using Conditions A:

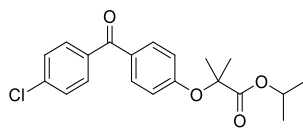

Following the general procedure E and using isopropyl 2-(4-(4-chlorobenzoyl)phenoxy)-2-methylpropanoate (**30**) (72.2 mg, 0.200 mmol), and purification via silica gel column chromatography using pentane:EtOAc = 20:1 as the eluent, the target compound [**D**]**30** was obtained as a colorless solid (66.0 mg, 91%). The degree of deuteration was determined by mass spectrometry.

**Deuterium Incorporation:** 1.18 D/molecule [HRMS]; 1.40 D/molecule [<sup>1</sup>H-NMR].

### NMR Data of Starting Material:

<sup>1</sup>H NMR (599 MHz, CDCl<sub>3</sub>) δ = 7.74-7.71 (m, 2H), 7.71-7.68 (m, 2H), 7.46-7.42 (m, 2H), 6.88-6.84 (m, 2H), 5.08 (hept, *J* = 6.3 Hz, 1H), 1.66 (s, 6H), 1.20 (d, *J* = 6.2 Hz, 6H) ppm.

<sup>13</sup>C NMR (101 MHz, CDCl<sub>3</sub>) δ = 194.4, 173.2, 159.9, 138.5, 136.6, 132.1, 131.3, 130.4, 128.7, 117.4, 79.6, 69.5, 25.5, 21.7 ppm.

### NMR Data of Product:

<sup>1</sup>H NMR (400 MHz, CDCl<sub>3</sub>) δ = 7.74-7.71 (m, 1.94H, 3%D), 7.71-7.68 (m, 1.92H, 4%D), 7.47-7.41 (m, 1.62H, 19%D), 6.88-6.84 (m, 1.12H, 44%D), 5.08 (hept, *J* = 6.3 Hz, 1H), 1.66 (s, 6H), 1.20 (d, *J* = 6.3 Hz, 6H) ppm.

<sup>13</sup>C NMR (101 MHz, CDCl<sub>3</sub>) δ = 194.4, 173.2, 159.9-159.7 (1C), 138.5-128.7 (9H), 117.5-117.4 (2C), 79.6, 69.5, 25.5, 21.7 ppm.

### Mass Data:

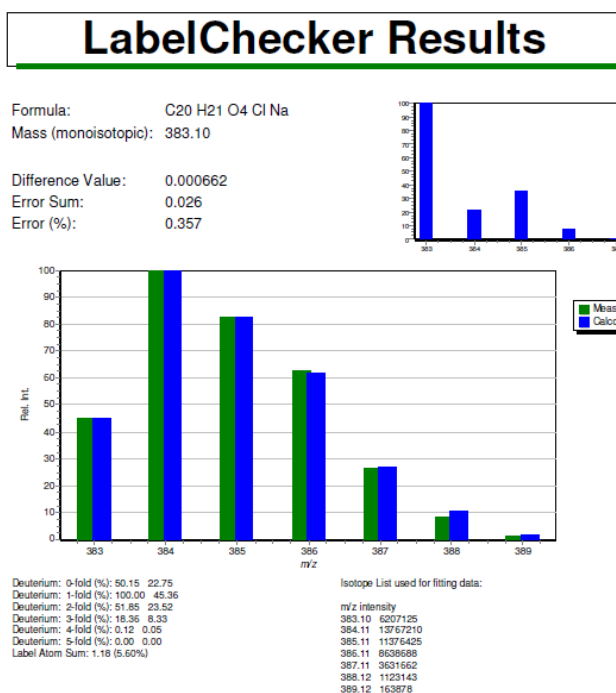

# <sup>1</sup>H-NMR spectrum in CDCl<sub>3</sub>:

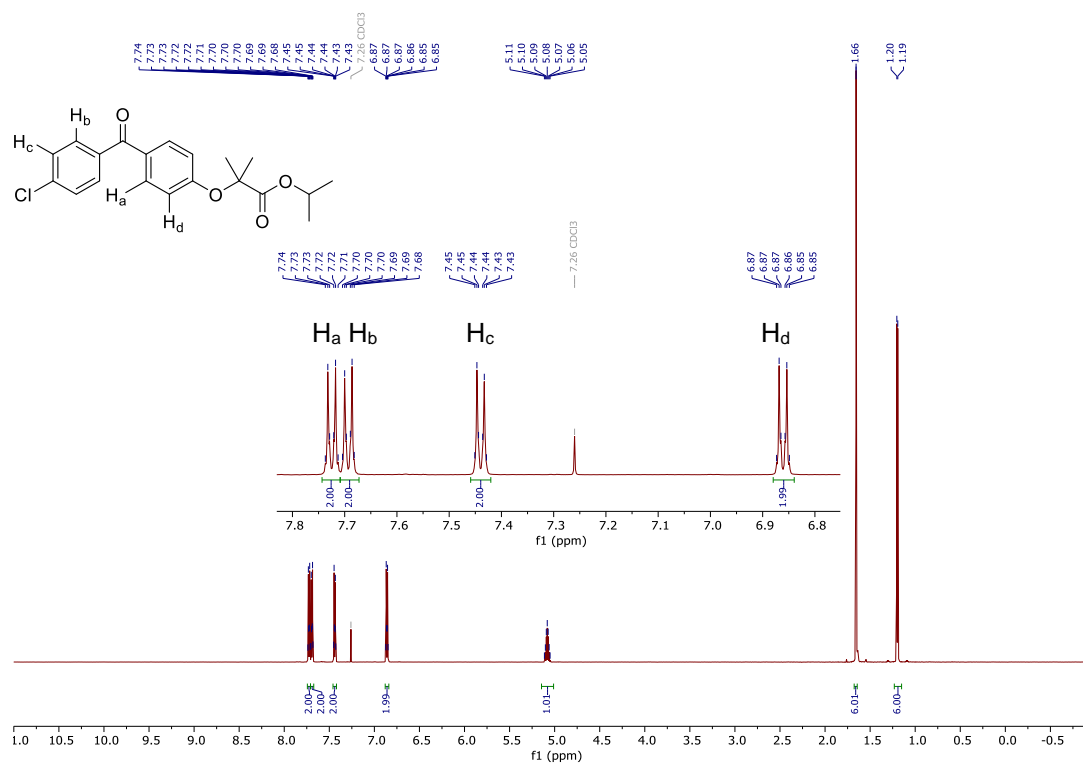

# <sup>1</sup>H-NMR spectrum in CDCl<sub>3</sub>:

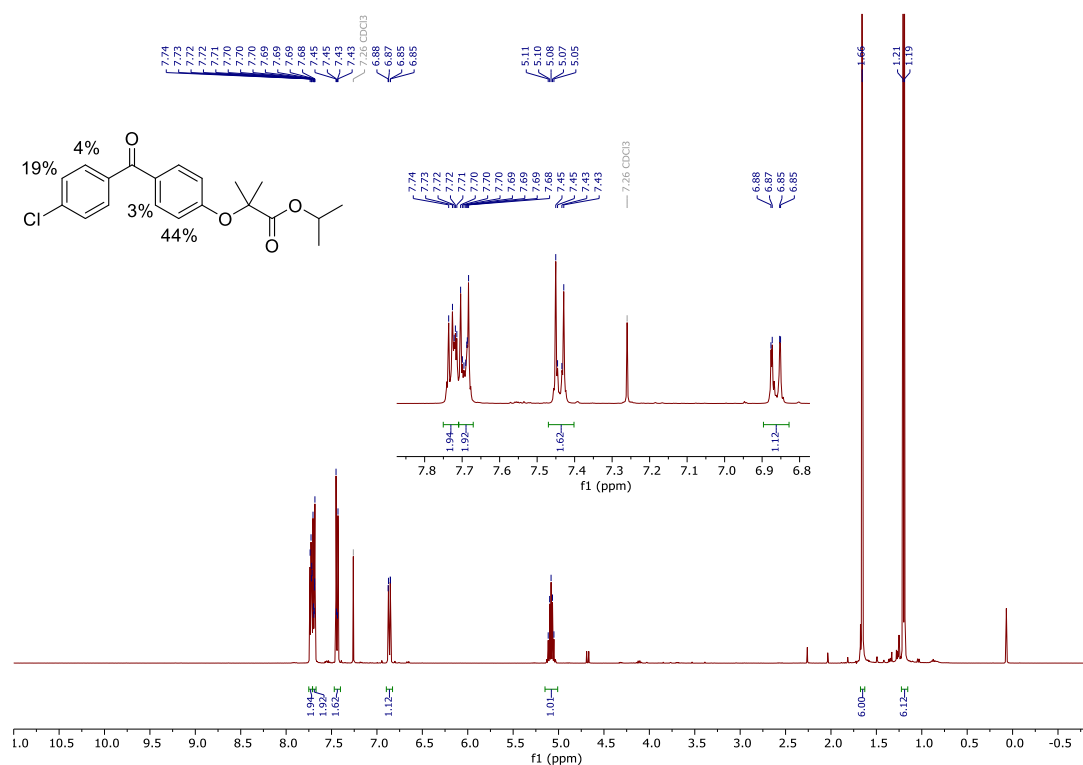

**<sup>13</sup>C-NMR spectrum in CDCl<sub>3</sub>:**

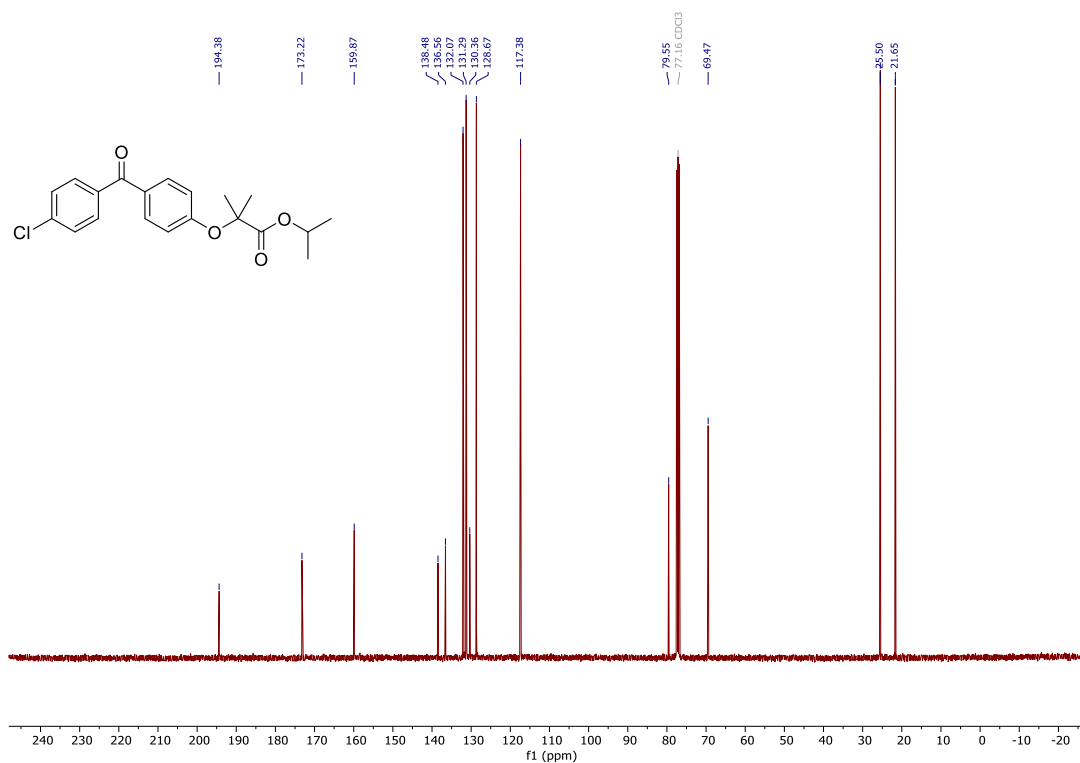

**<sup>13</sup>C-NMR spectrum in CDCl<sub>3</sub>:**

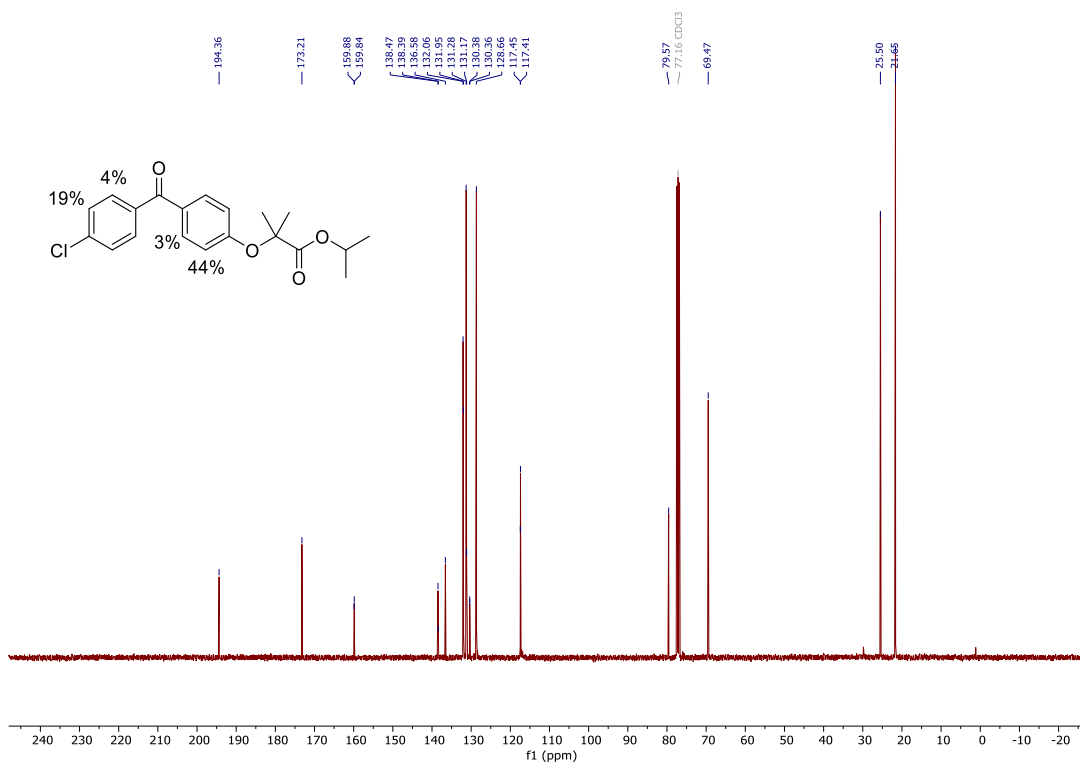

## Deuteration of isopropyl 2-(4-(4-chlorobenzoyl)phenoxy)-2-methylpropanoate (**30**) Using Conditions B:

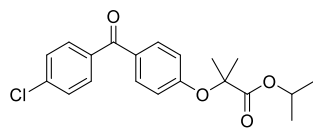

Following the general procedure F and using isopropyl 2-(4-(4-chlorobenzoyl)phenoxy)-2-methylpropanoate (**30**) (72.2 mg, 0.200 mmol), and purification via silica gel column chromatography using pentane:EtOAc = 20:1 as the eluent, the target compound [**D**]**30** was obtained as a colorless solid (66.7 mg, 92%). The degree of deuteration was determined by mass spectrometry.

**Deuterium Incorporation:** 6.12 D/molecule [HRMS]; 6.25 D/molecule [<sup>1</sup>H-NMR].

### NMR Data of Starting Material:

<sup>1</sup>H NMR (599 MHz, CDCl<sub>3</sub>) δ = 7.74-7.71 (m, 2H), 7.71-7.68 (m, 2H), 7.46-7.42 (m, 2H), 6.88-6.84 (m, 2H), 5.08 (hept, *J* = 6.3 Hz, 1H), 1.66 (s, 6H), 1.20 (d, *J* = 6.2 Hz, 6H) ppm.

<sup>13</sup>C NMR (101 MHz, CDCl<sub>3</sub>) δ = 194.4, 173.2, 159.9, 138.5, 136.6, 132.1, 131.3, 130.4, 128.7, 117.4, 79.6, 69.5, 25.5, 21.7 ppm.

### NMR Data of Product:

<sup>1</sup>H NMR (400 MHz, CDCl<sub>3</sub>) δ = 7.72 (s, 0.88H, 56%D), 7.69 (s, 0.65H, 68%D), 7.45-7.43 (m, 0.12H, 94%D), 6.88-6.84 (m, 0.10H, 95%D), 5.08 (hept, *J* = 6.3 Hz, 1H), 1.65 (s, 3H), 1.19 (d, *J* = 6.3 Hz, 6H) ppm.

<sup>13</sup>C NMR (101 MHz, CDCl<sub>3</sub>) δ = 194.3, 173.2, 159.8, 138.3, 136.6-136.4 (1C), 132.2-131.6 (2C), 131.3-130.7 (2C), 130.4-130.0(1C), 128.7-128.0 (2C), 117.4-117.0 (2C), 79.5, 69.5, 25.5, 21.6 ppm.

### Mass Data:

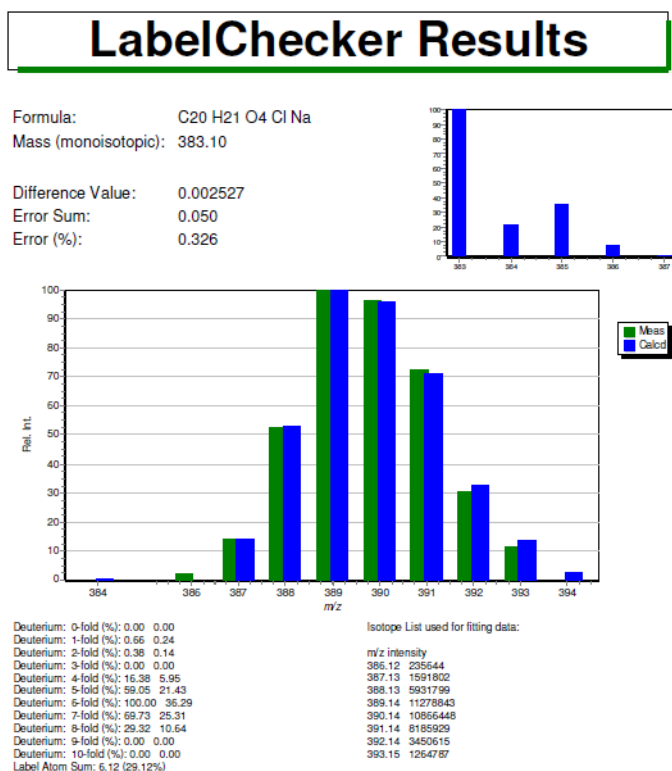



**<sup>1</sup>H-NMR spectrum in CDCl<sub>3</sub>:**

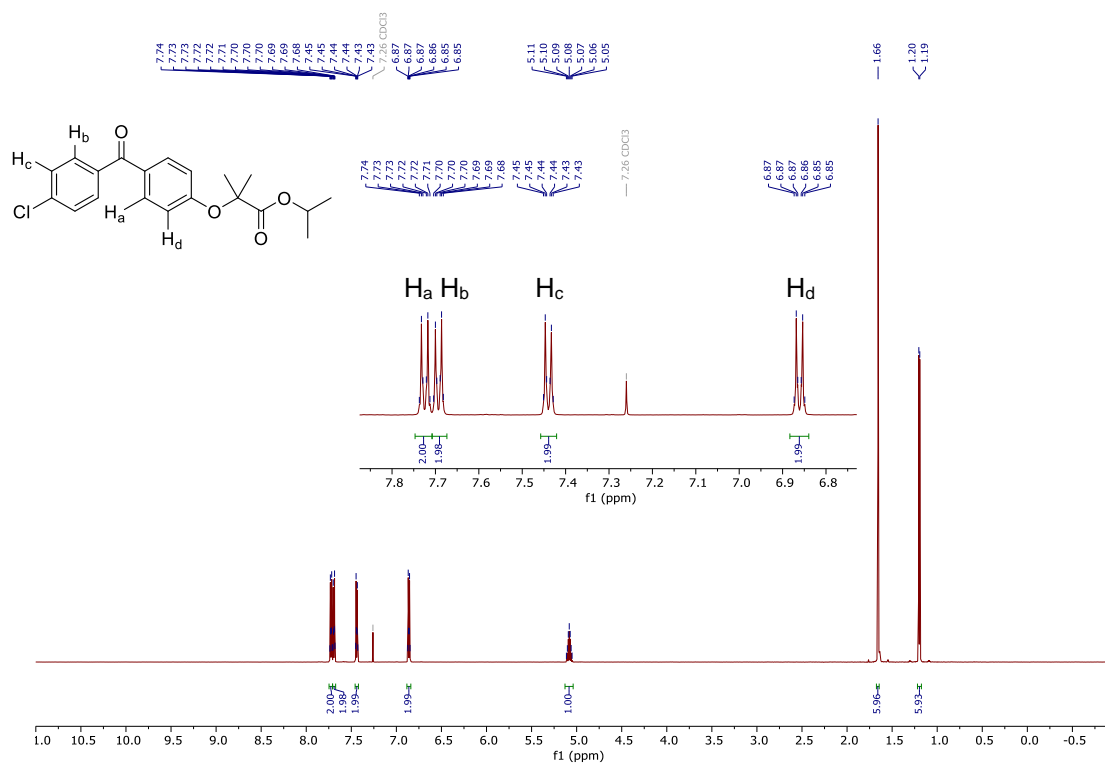

**<sup>1</sup>H-NMR spectrum in CDCl<sub>3</sub>:**

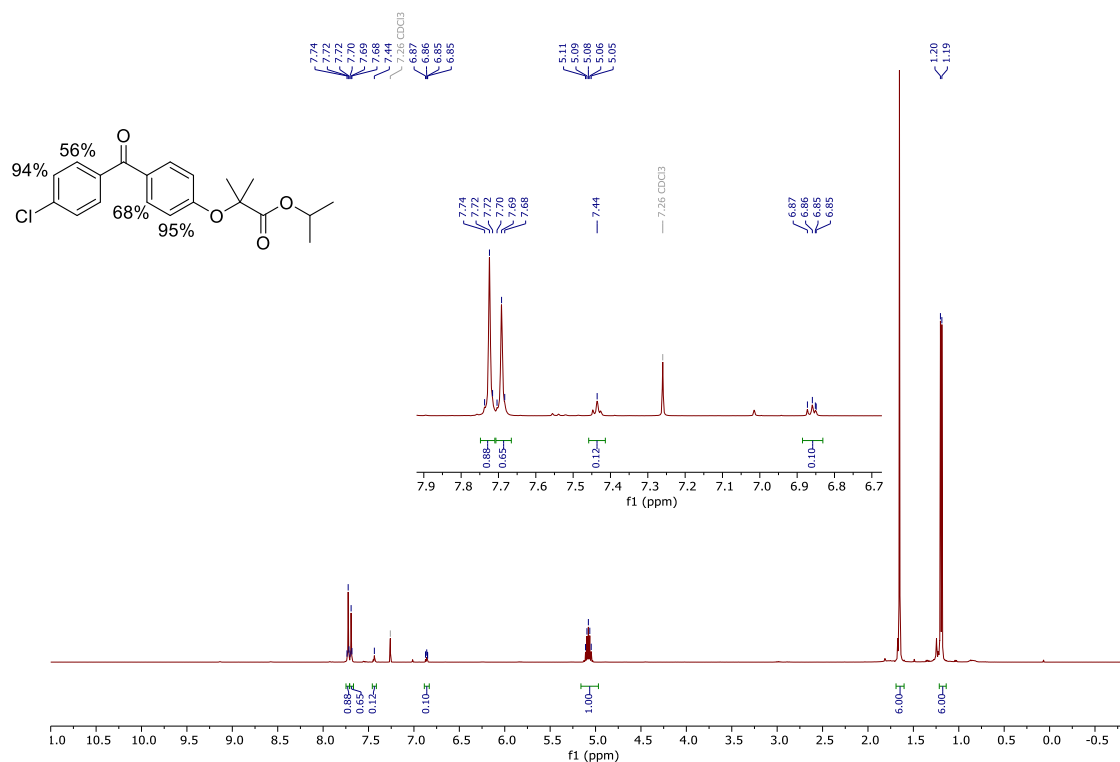

### <sup>13</sup>C-NMR spectrum in CDCl<sub>3</sub>:

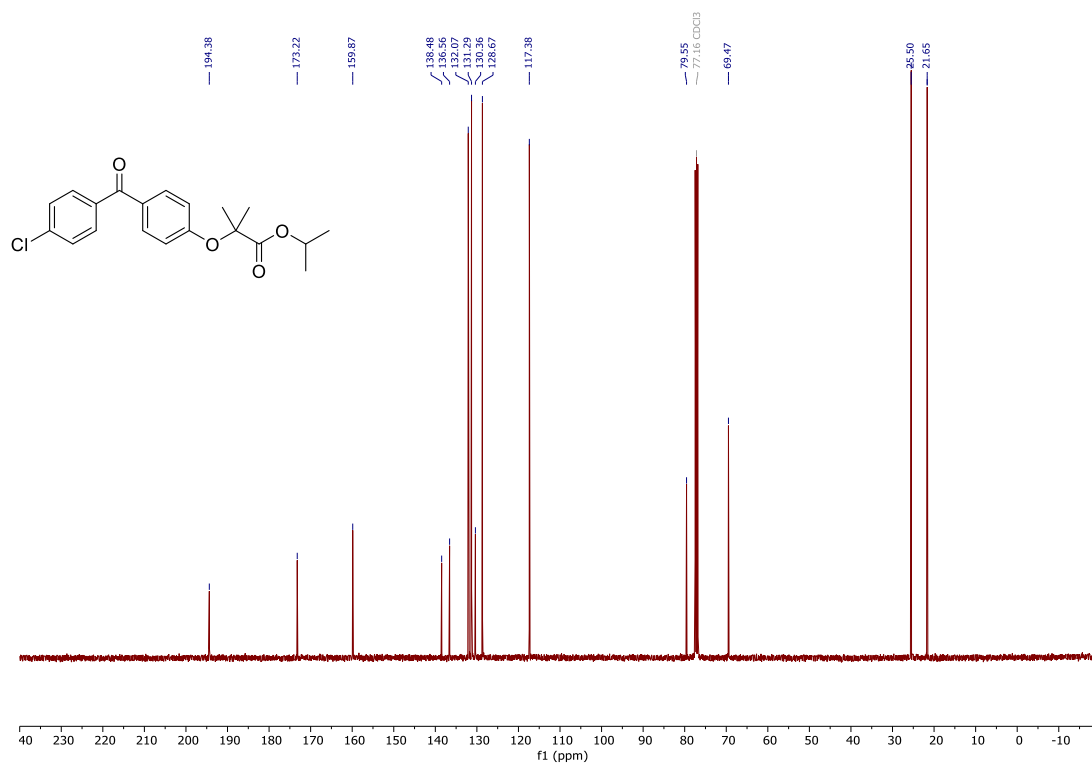

### <sup>13</sup>C-NMR spectrum in CDCl<sub>3</sub>:

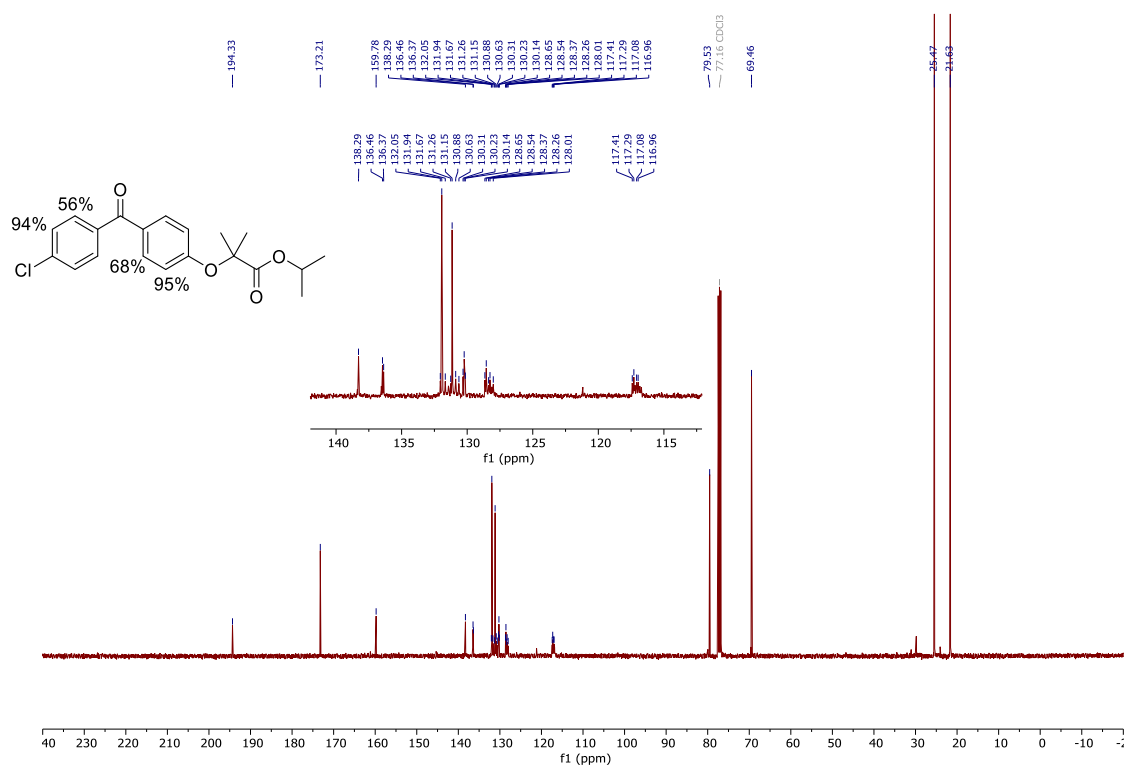

## Deuteration of methyl 2-(6-methoxy-3-oxo-3H-xanthen-9-yl)benzoate (**31**) Using Conditions A:

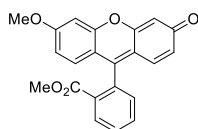

Following the general procedure E and using methyl 2-(6-methoxy-3-oxo-3H-xanthen-9-yl)benzoate (**31**) (72.1 mg, 0.200 mmol), and purification via silica gel column chromatography using pentane:EtOAc = 9:1 as the eluent, the target compound [**D**]**31** was obtained as colorless solid (62.5 mg, 86%). The degree of deuteration was determined by mass spectrometry.

**Deuterium Incorporation:** 2.49 D/molecule [Mass]; 2.45 D/molecule [<sup>1</sup>H-NMR].

### NMR Data of Starting Material:

<sup>1</sup>H NMR (500 MHz, CDCl<sub>3</sub>) δ = 8.02 (d, *J* = 7.5 Hz, 1H), 7.66 (td, *J* = 7.4, 1.2 Hz, 1H), 7.61 (td, *J* = 7.4, 1.1 Hz, 1H), 7.16 (d, *J* = 7.5 Hz, 1H), 6.78 (d, *J* = 2.5 Hz, 2H), 6.69 (d, *J* = 8.7 Hz, 2H), 6.61 (dd, *J* = 8.8, 2.6 Hz, 2H), 3.84 (s, 6H) ppm.

<sup>13</sup>C NMR (126 MHz, CDCl<sub>3</sub>) δ = 169.6, 161.5, 153.4, 152.7, 135.1, 129.8, 129.3, 127.0, 125.2, 124.1, 111.8, 111.4, 101.0, 83.4, 55.7(3), 55.7(0) ppm.

### NMR Data of Product:

<sup>1</sup>H NMR (400 MHz, CDCl<sub>3</sub>) δ = 8.02 (d, *J* = 7.8 Hz, 1H), 7.66 (td, *J* = 7.4, 1.3 Hz, 1H), 7.61 (td, *J* = 7.4, 1.2 Hz, 1H), 7.16 (d, *J* = 7.5 Hz, 1H), 6.80-6.74 (m, 0.91H, 95% D), 6.71-6.67 (m, 1.85H, 7.5%), 6.61 (dd, *J* = 8.8, 2.5 Hz, 0.59H, 71% D), 3.83 (s, 6H) ppm.

<sup>13</sup>C NMR (101 MHz, CDCl<sub>3</sub>) δ = 169.6, 162.8-160.3 (1C), 153.3, 152.8-152.4, 135.1, 129.8, 129.3-128.9 (2C), 127.0, 125.1, 124.0, 111.7, 111.4-111.3 (1C), 101.3-100.7 (1C), 83.4, 55.7 ppm.

### Mass Data:

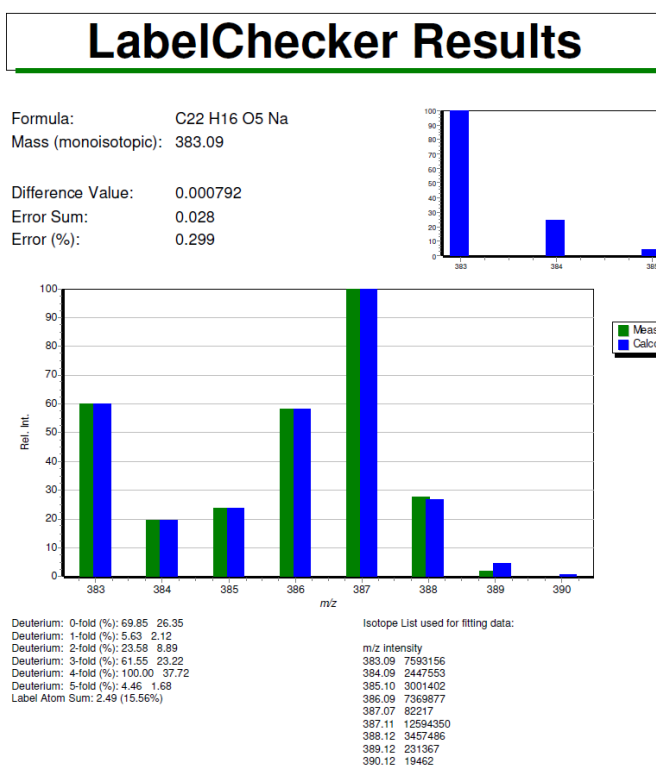

### <sup>1</sup>H-NMR spectrum in CDCl<sub>3</sub>:

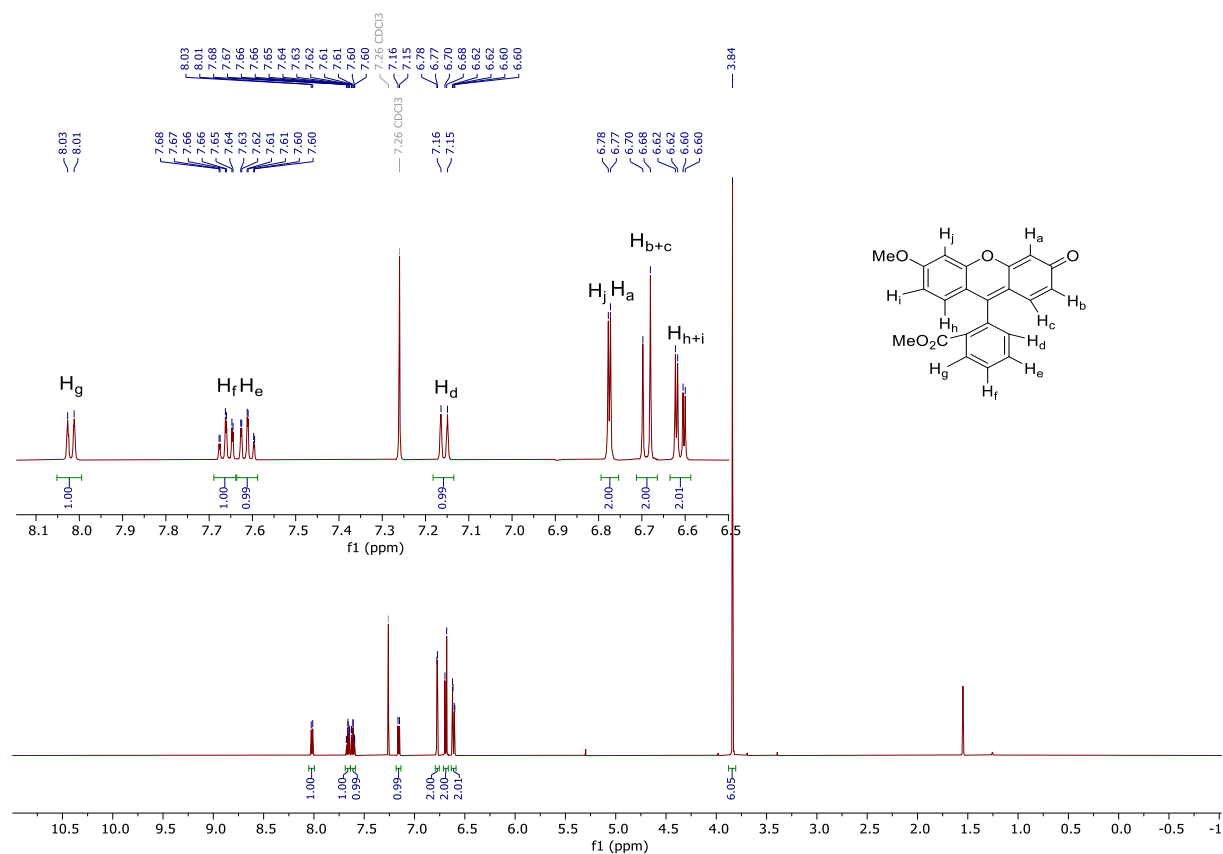

### <sup>1</sup>H-NMR spectrum in CDCl<sub>3</sub>:

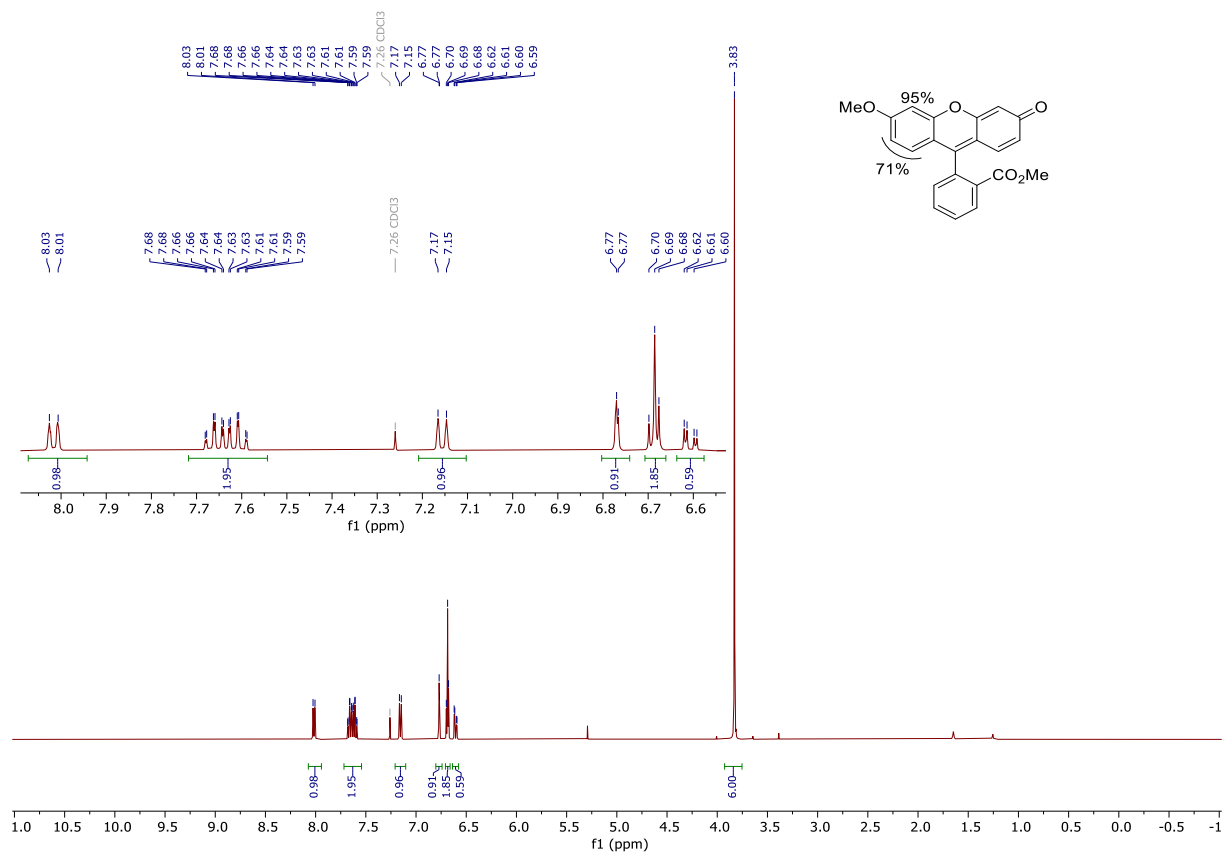

### <sup>13</sup>C-NMR spectrum in CDCl<sub>3</sub>:

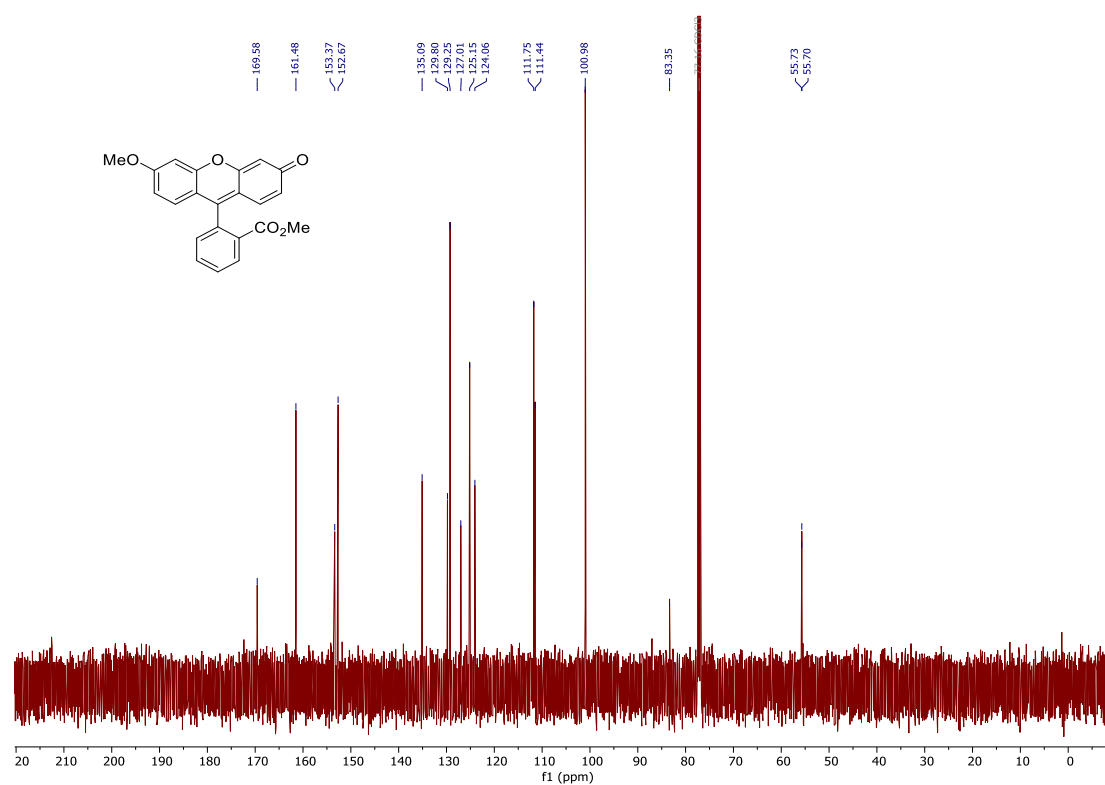

### <sup>13</sup>C-NMR spectrum in CDCl<sub>3</sub>:

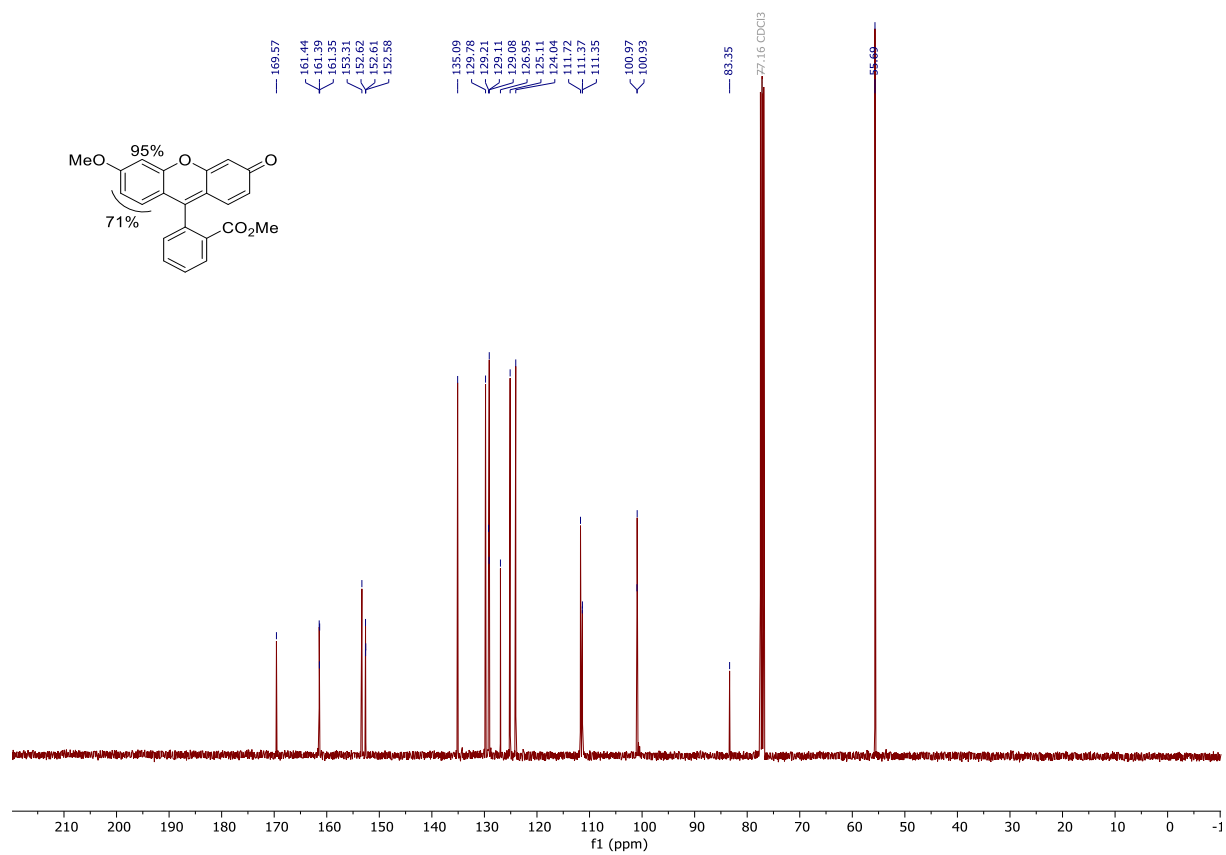

## Deuteration of methyl 2-(6-methoxy-3-oxo-3H-xanthen-9-yl)benzoate (**31**) Using Conditions B:

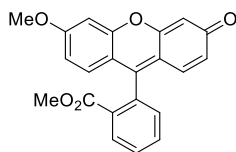

Following the general procedure F and using methyl 2-(6-methoxy-3-oxo-3H-xanthen-9-yl)benzoate (**31**) (72.1 mg, 0.200 mmol), and purification via silica gel column chromatography using pentane:EtOAc = 9:1 as the eluent, the target compound [**D**]**31** was obtained as colorless solid (64.2 mg, 88%). The degree of deuteration was determined by mass spectrometry.

**Deuterium Incorporation:** 4.57 D/molecule [Mass]; 4.85 D/molecule [<sup>1</sup>H-NMR].

### NMR Data of Starting Material:

<sup>1</sup>H NMR (500 MHz, CDCl<sub>3</sub>) δ = 8.02 (d, *J* = 7.5 Hz, 1H), 7.66 (td, *J* = 7.4, 1.2 Hz, 1H), 7.61 (td, *J* = 7.4, 1.1 Hz, 1H), 7.16 (d, *J* = 7.5 Hz, 1H), 6.78 (d, *J* = 2.5 Hz, 2H), 6.69 (d, *J* = 8.7 Hz, 2H), 6.61 (dd, *J* = 8.8, 2.6 Hz, 2H), 3.84 (s, 6H) ppm.

<sup>13</sup>C NMR (126 MHz, CDCl<sub>3</sub>) δ = 169.6, 161.5, 153.4, 152.7, 135.1, 129.8, 129.3, 127.0, 125.2, 124.1, 111.8, 111.4, 101.0, 83.4, 55.7(3), 55.7(0) ppm.

### NMR Data of Product:

<sup>1</sup>H NMR (400 MHz, CDCl<sub>3</sub>) δ = 8.05-7.99 (m, 0.74H, 26% D), 7.69-7.63 (m, 0.75H, 25% D), 7.63-7.58 (m, 0.68H, 32% D), 7.19-7.12 (m, 1H), 6.77 (s, 0.11H, 95% D), 6.72-6.65 (m, 1.75H, 12.5% D), 6.60 (d, *J* = 8.8 Hz, 0.10H, 95% D), 3.82 (s, 3H) ppm.

<sup>13</sup>C NMR (101 MHz, CDCl<sub>3</sub>) δ = 169.6, 161.4, 153.3, 152.7, 135.4-134.4 (1C), 130.0-129.5 (1C), 129.2-128.9 (2C), 127.0-126.8 (1C), 125.2-124.9 (1C), 124.2-123.7 (1C), 112.4-110.9 (1C), 101.3-100.0 (2C), 83.4, 55.7 ppm.

### Mass Data:

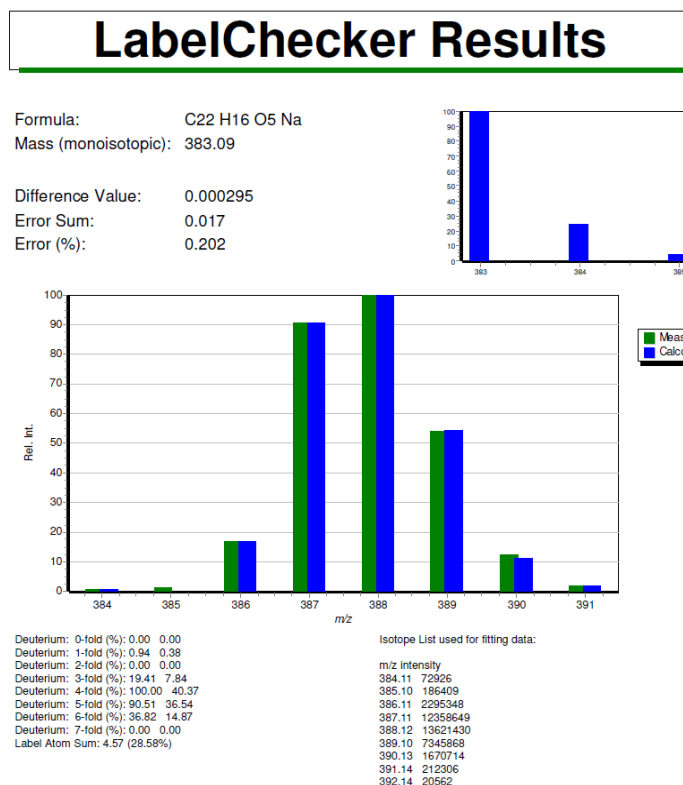

### <sup>1</sup>H-NMR spectrum in CDCl<sub>3</sub>:

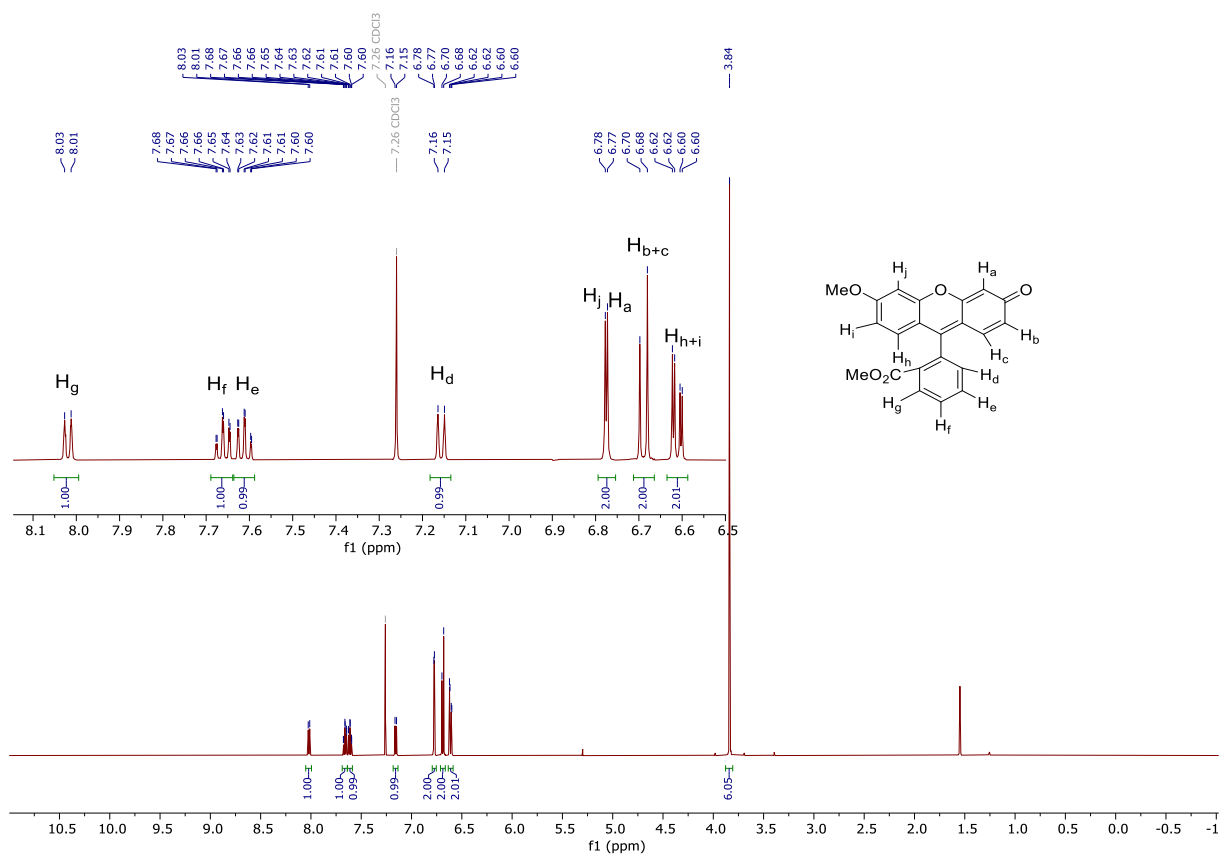

### <sup>1</sup>H-NMR spectrum in CDCl<sub>3</sub>:

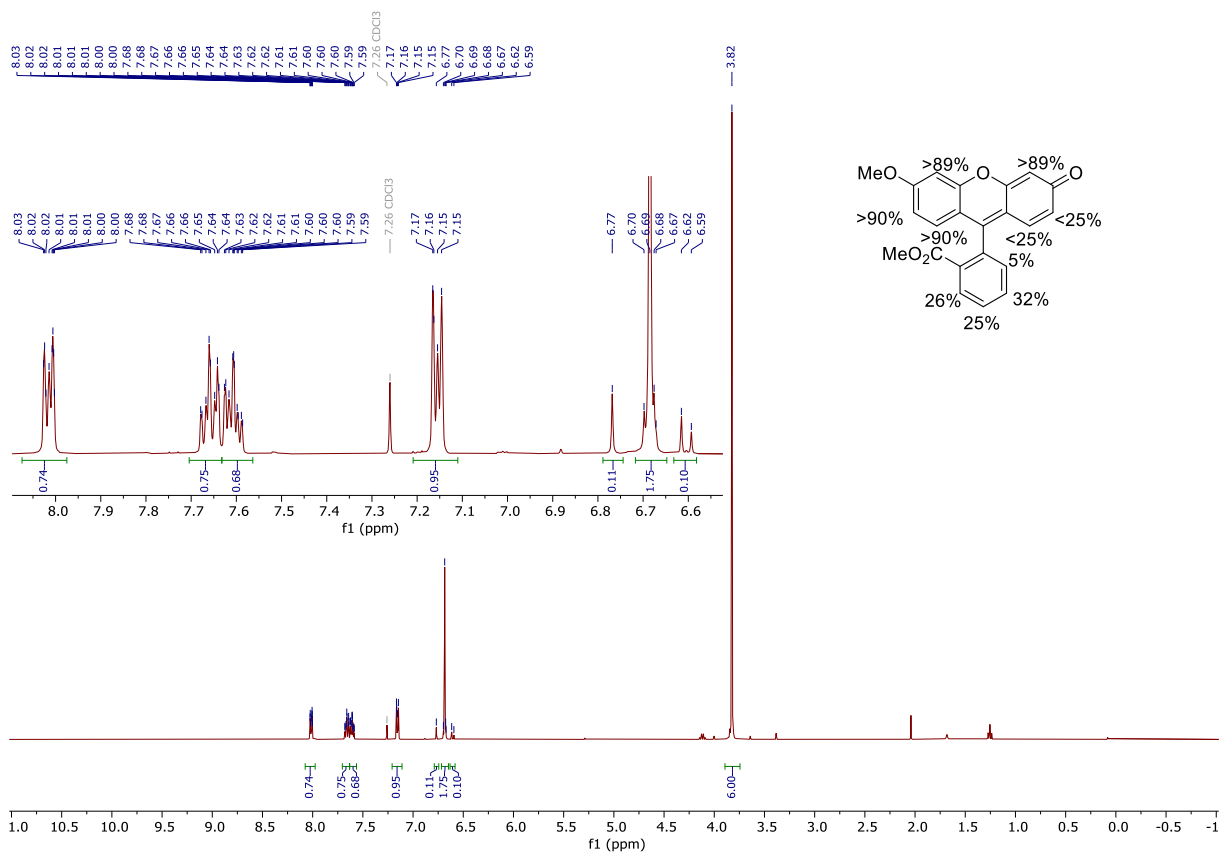

**<sup>13</sup>C-NMR spectrum in CDCl<sub>3</sub>:**

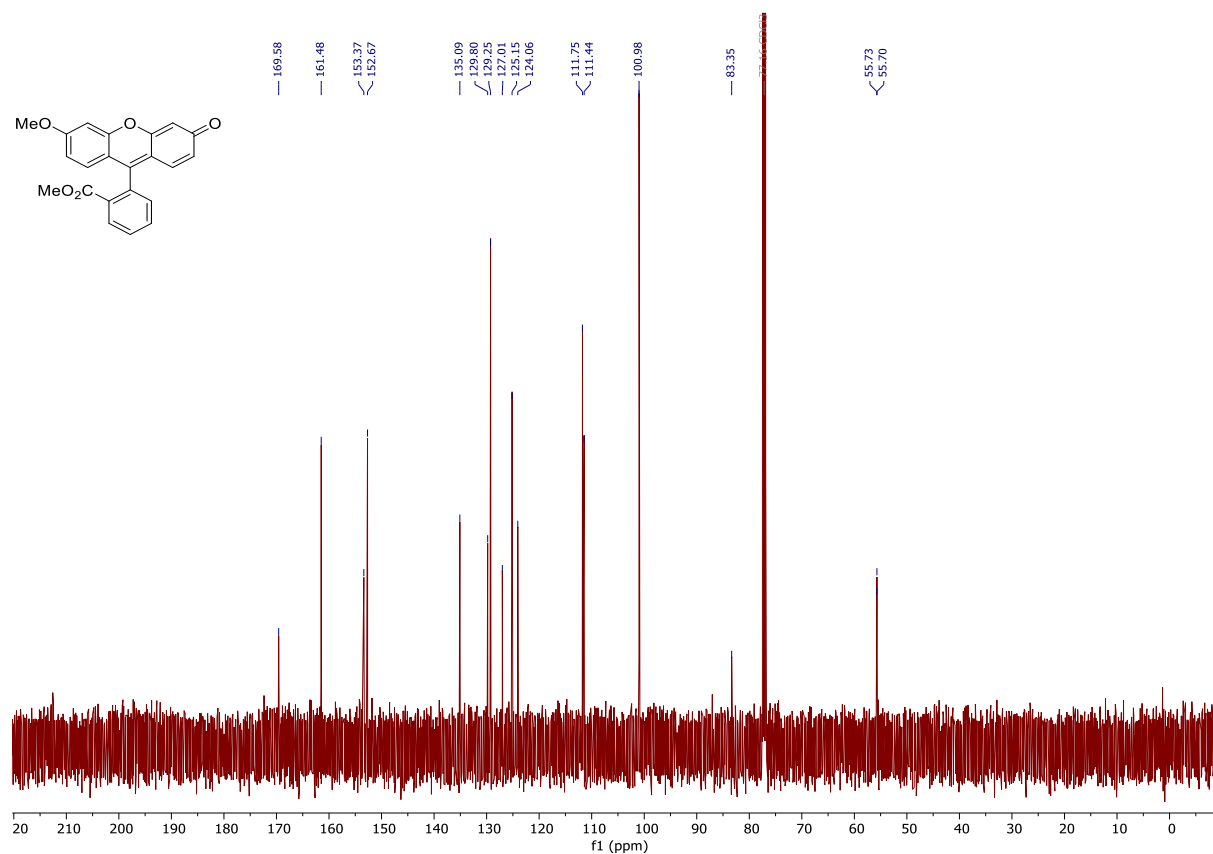

**<sup>13</sup>C-NMR spectrum in CDCl<sub>3</sub>:**

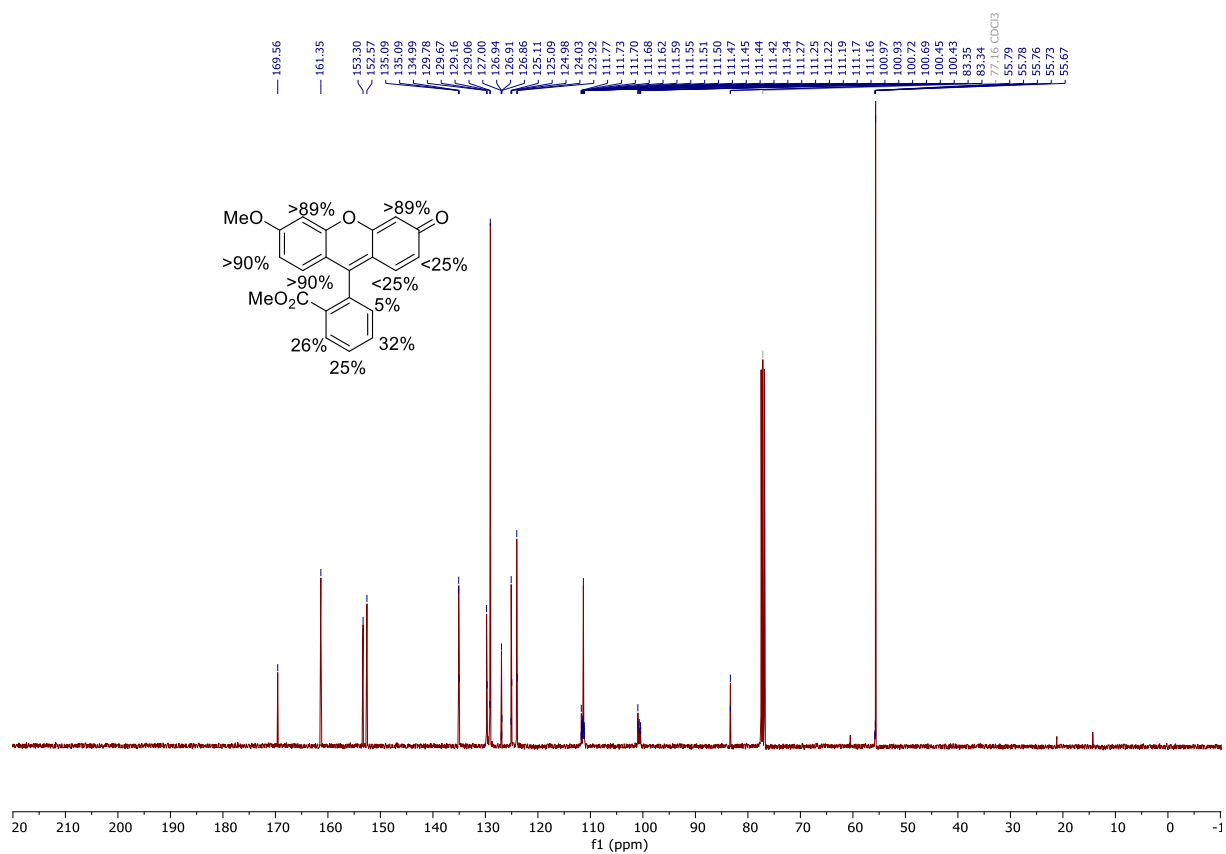



## Deuteration of methyl 2-methyl-4'-(trifluoromethoxy)-[1,1'-biphenyl]-3-carboxylate (**32**):

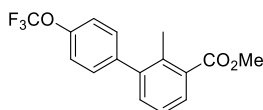

Following the general procedure F and using methyl methyl 2-methyl-4'-(trifluoromethoxy)-[1,1'-biphenyl]-3-carboxylate (**32**) (62.1 mg, 0.200 mmol), and purification via silica gel column chromatography using pentane:Et<sub>2</sub>O = 50:1 as the eluent, the target compound [**D**]**32** was obtained as light-yellow liquid (56.2 mg, 89%). The degree of deuteration was determined by mass spectrometry.

**Deuterium Incorporation:** 6.06 D/molecule [Mass]; 6.02 D/molecule [<sup>1</sup>H-NMR].

### NMR Data of Starting Material:

<sup>1</sup>H NMR (500 MHz, C<sub>6</sub>D<sub>6</sub>) δ = 7.84 (dd, *J* = 7.6, 1.7 Hz, 1H), 6.99 (dd, *J* = 7.8, 1.6 Hz, 1H) 6.94 (t, *J* = 7.6 Hz, 1H), 6.92-6.89 (m, 2H), 6.83-6.79 (m, 2H), 3.51 (s, 3H), 2.42 (s, 3H) ppm.

<sup>13</sup>C NMR (126 MHz, C<sub>6</sub>D<sub>6</sub>) δ = 168.2, 148.7 (q, *J* = 1.7 Hz), 142.7, 140.6, 137.2, 133.3, 132.2, 131.0, 130.0, 125.6, 121.3 (q, *J* = 257 Hz), 120.9 (d, *J* = 1.0 Hz), 51.6, 18.6 ppm.

<sup>19</sup>F NMR (470 MHz, C<sub>6</sub>D<sub>6</sub>) δ = -57.7 ppm.

### NMR Data of Product:

<sup>1</sup>H NMR (400 MHz, C<sub>6</sub>D<sub>6</sub>) δ = 7.84 (s, 0.06H, 94% D), 6.99 (s, 0.09H, 91% D), 6.95 (s, 0.07H, 93% D), 6.91 (s, 0.12H, 94% D), 6.82 (s, 0.58H, 71% D), 3.52 (s, 3H), 2.42 (s, 3H) ppm.

<sup>13</sup>C NMR (101 MHz, C<sub>6</sub>D<sub>6</sub>) δ = 168.2, 148.6 (d, *J* = 2.2 Hz), 143.3-141.6 (1C), 140.3-140.5 (1C), 137.2, 133.7-132.4 (1C), 132.1, 131.4-130.2 (1C), 130.2-129.2 (1C), 125.6-124.5 (1C), 121.3 (q, *J* = 257 Hz), 121.2-121.1 (1C), 51.6, 18.6 ppm.

<sup>19</sup>F NMR (377 MHz, C<sub>6</sub>D<sub>6</sub>) δ = -57.7 ppm.

### Mass Data:

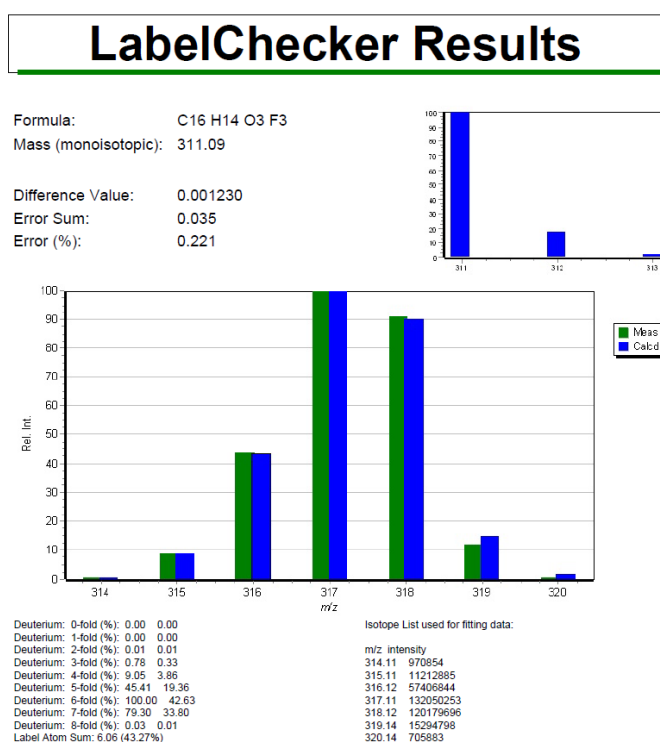

# <sup>1</sup>H-NMR spectrum in C<sub>6</sub>D<sub>6</sub>:

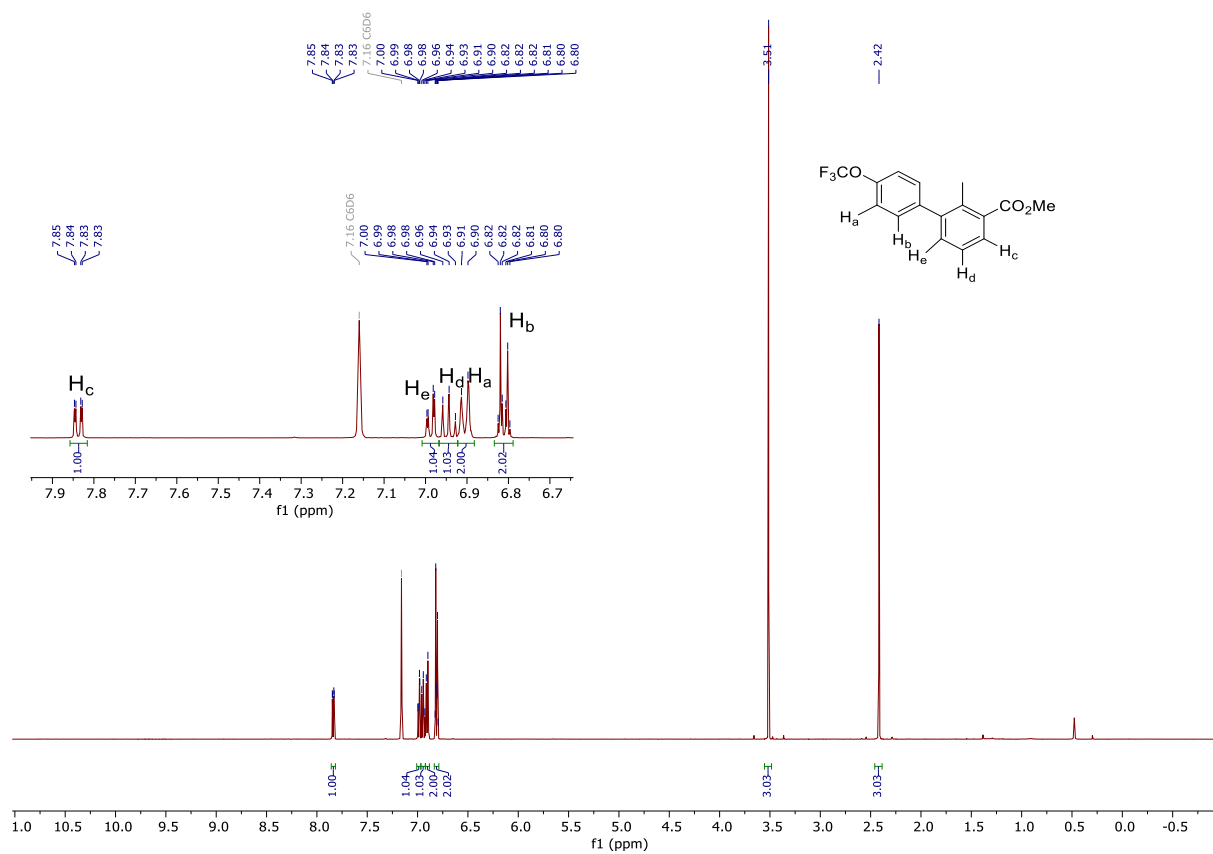

# <sup>1</sup>H-NMR spectrum in C<sub>6</sub>D<sub>6</sub>:

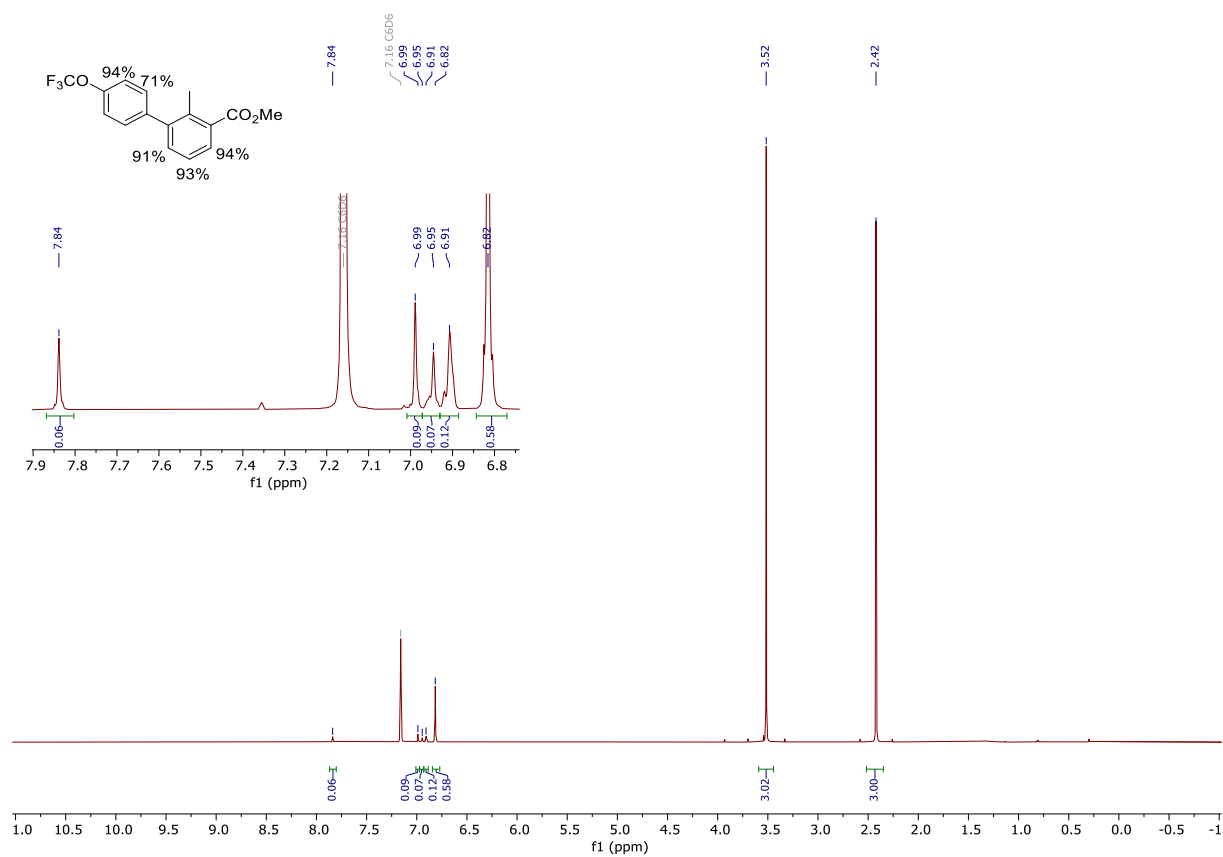

### <sup>13</sup>C-NMR spectrum in C<sub>6</sub>D<sub>6</sub>:

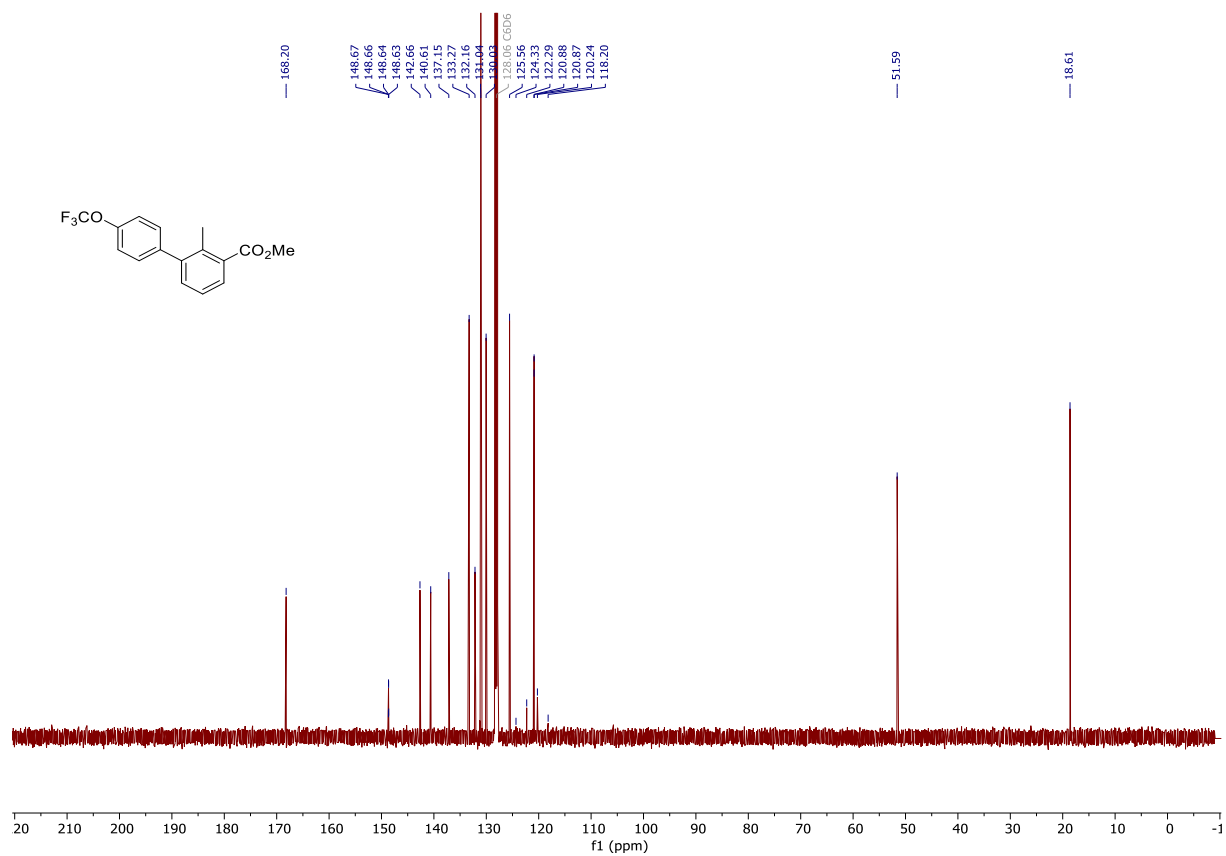

### <sup>13</sup>C-NMR spectrum in C<sub>6</sub>D<sub>6</sub>:

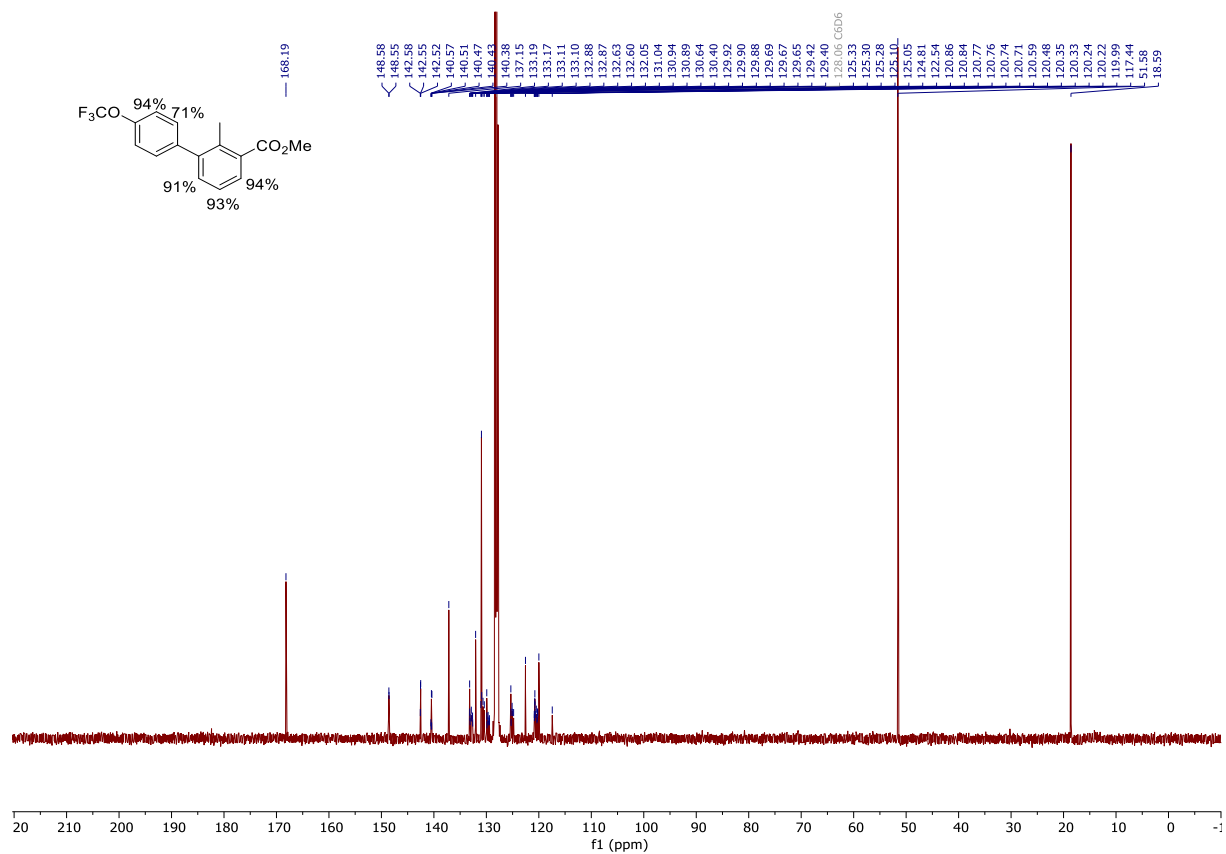

**$^{19}\text{F}$ -NMR spectrum in  $\text{C}_6\text{D}_6$ :**

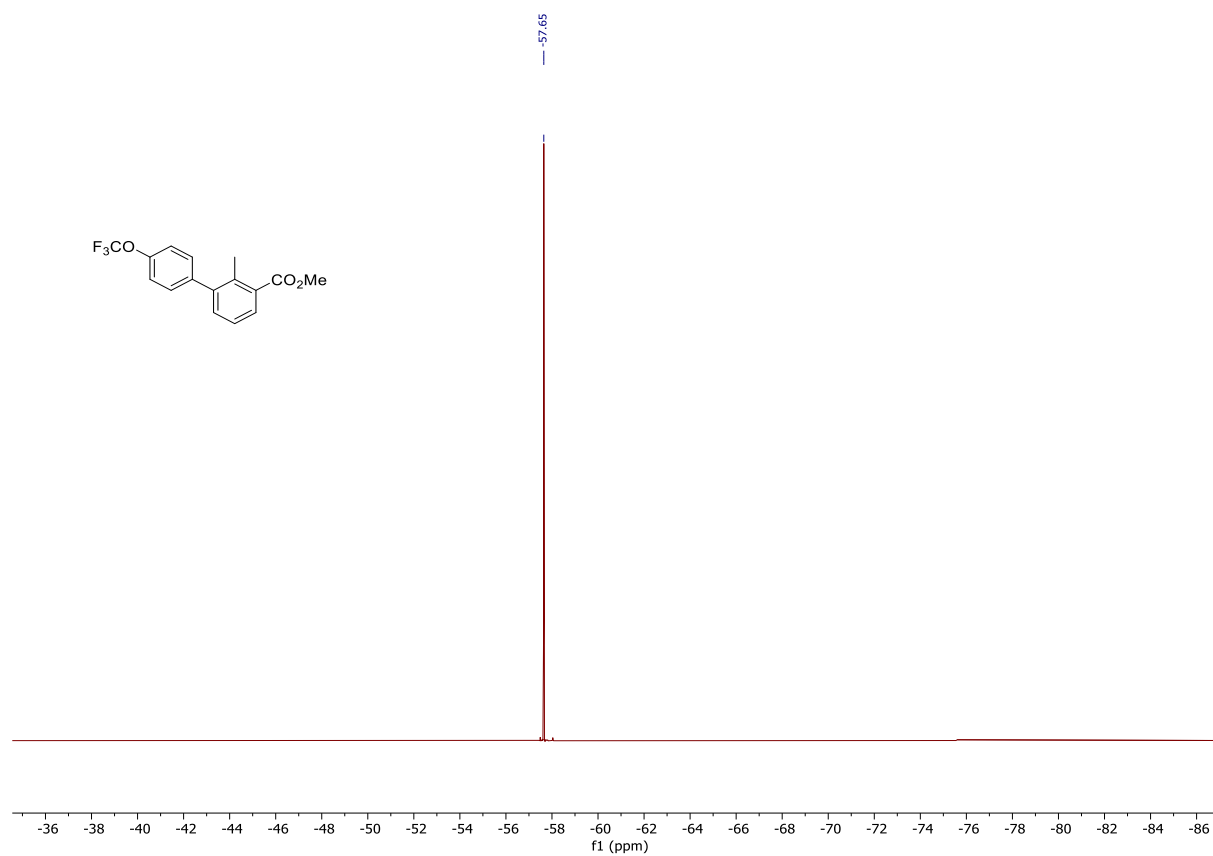

**$^{19}\text{F}$ -NMR spectrum in  $\text{C}_6\text{D}_6$ :**

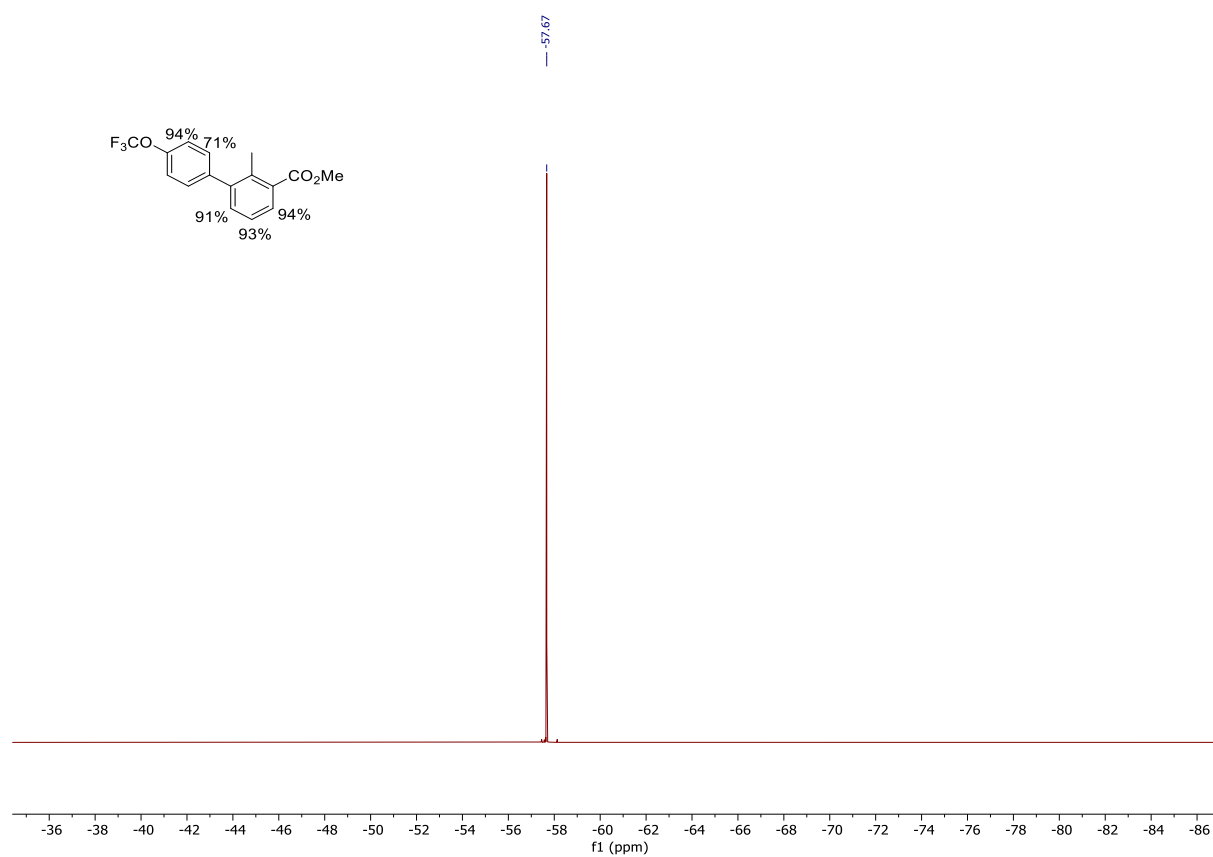

## Deuteration of 2,2-dimethyl-2,3-dihydrobenzofuran-7-yl methylcarbamate (**33**):

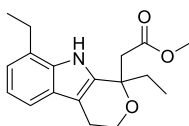

Following the general procedure E and using 2,2-dimethyl-2,3-dihydrobenzofuran-7-yl methylcarbamate (**33**) (60.3 mg, 0.200 mmol), and purification via silica gel column chromatography using pentane:EtOAc = 20:1→10:1 as the eluent, the target compound [**D**]**33** was obtained as a colorless solid (47.4 mg, 78%). The degree of deuteration was determined by mass spectrometry.

**Deuterium Incorporation:** 2.31 D/molecule [HRMS]; 2.28 D/molecule [<sup>1</sup>H-NMR].

### NMR Data of Starting Material:

<sup>1</sup>H NMR (599 MHz, CDCl<sub>3</sub>) δ = 9.06 (br. s, 1H), 7.37 (d, *J* = 7.6 Hz, 1H), 7.07 (dd, *J* = 7.6 Hz, 1H), 7.02 (d, *J* = 7.6 Hz, 1H), 4.06 (dd, *J* = 11.2, 4.8, 4.8 Hz, 1H), 3.95 (ddd, *J* = 11.6, 7.6, 4.3 Hz, 1H), 3.73 (s, 3H), 3.03 (d, *J* = 16.5 Hz, 1H), 2.93 (d, *J* = 16.5 Hz, 1H), 2.89 (qd, *J* = 7.6, 2.0 Hz, 2H), 2.85 (ddd, *J* = 15.1, 7.6, 4.9 Hz, 1H), 2.76 (ddd, *J* = 15.2, 4.6, 4.6 Hz, 1H), 2.18 (dq, *J* = 14.8, 7.4 Hz, 1H), 2.02 (dq, *J* = 14.6, 7.3 Hz, 1H), 1.39 (t, *J* = 7.6 Hz, 3H), 0.85 (dd, *J* = 7.4 Hz, 3H) ppm.

<sup>13</sup>C NMR (101 MHz, CDCl<sub>3</sub>) δ = 173.4, 136.0, 134.6, 126.8, 126.3, 120.5, 119.7, 116.1, 108.6, 74.7, 60.8, 52.1, 42.9, 30.8, 24.3, 22.5, 13.9, 7.7 ppm.

### NMR Data of Product:

<sup>1</sup>H NMR (599 MHz, CDCl<sub>3</sub>) δ = 9.06 (br. s, 1H), 7.40-35 (m, 0.07H, 93%D), 7.08-7.05 (m, 0.05H, 95%), 7.02 (s, 0.60H, 40%D), 4.06 (dd, *J* = 11.2, 4.8, 4.8 Hz, 1H), 3.95 (ddd, *J* = 11.6, 7.6, 4.3 Hz, 1H), 3.73 (s, 3H), 3.03 (d, *J* = 16.5 Hz, 1H), 2.93 (d, *J* = 16.5 Hz, 1H), 2.89 (qd, *J* = 7.6, 2.0 Hz, 2H), 2.85 (ddd, *J* = 15.1, 7.6, 4.9 Hz, 1H), 2.76 (ddd, *J* = 15.2, 4.6, 4.6 Hz, 1H), 2.18 (dq, *J* = 14.8, 7.4 Hz, 1H), 2.02 (dq, *J* = 14.6, 7.3 Hz, 1H), 1.38 (t, *J* = 7.6 Hz, 3H), 0.84 (dd, *J* = 7.4 Hz, 3H) ppm.

<sup>13</sup>C NMR (101 MHz, CDCl<sub>3</sub>) δ = 173.4, 136.0, 134.6, 126.8-126.4 (1C), 126.3-126.1 (1C), 120.4, 119.8-119.4 (1C), 116.2-115.7 (1C), 108.5, 74.8, 60.8, 52.1, 43.0, 30.8, 24.3-24.2 (1C), 22.6, 13.9-13.8 (1C), 7.7 ppm.

### Mass Data:

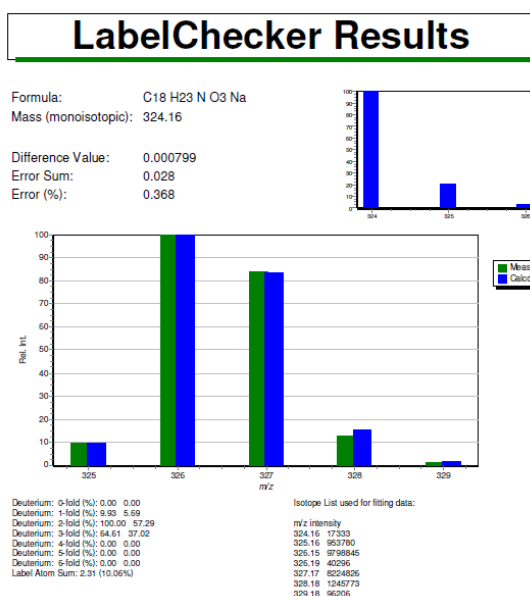

# <sup>1</sup>H-NMR spectrum in CDCl<sub>3</sub>:

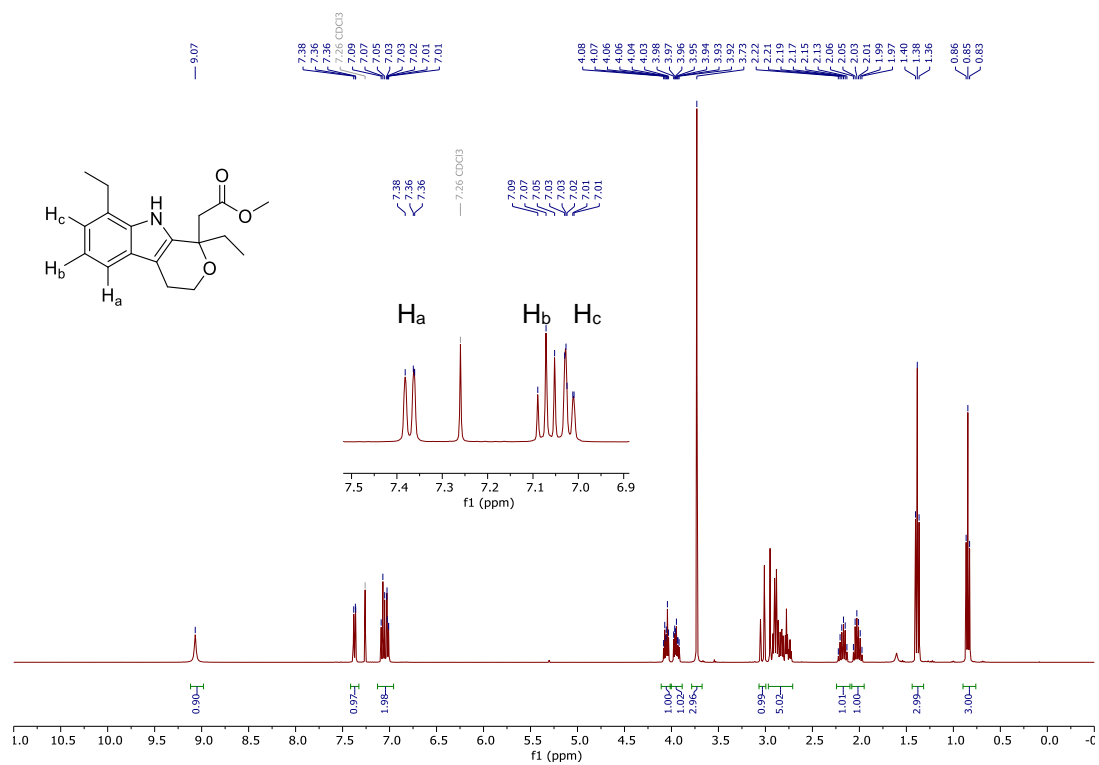

# <sup>1</sup>H-NMR spectrum in CDCl<sub>3</sub>:

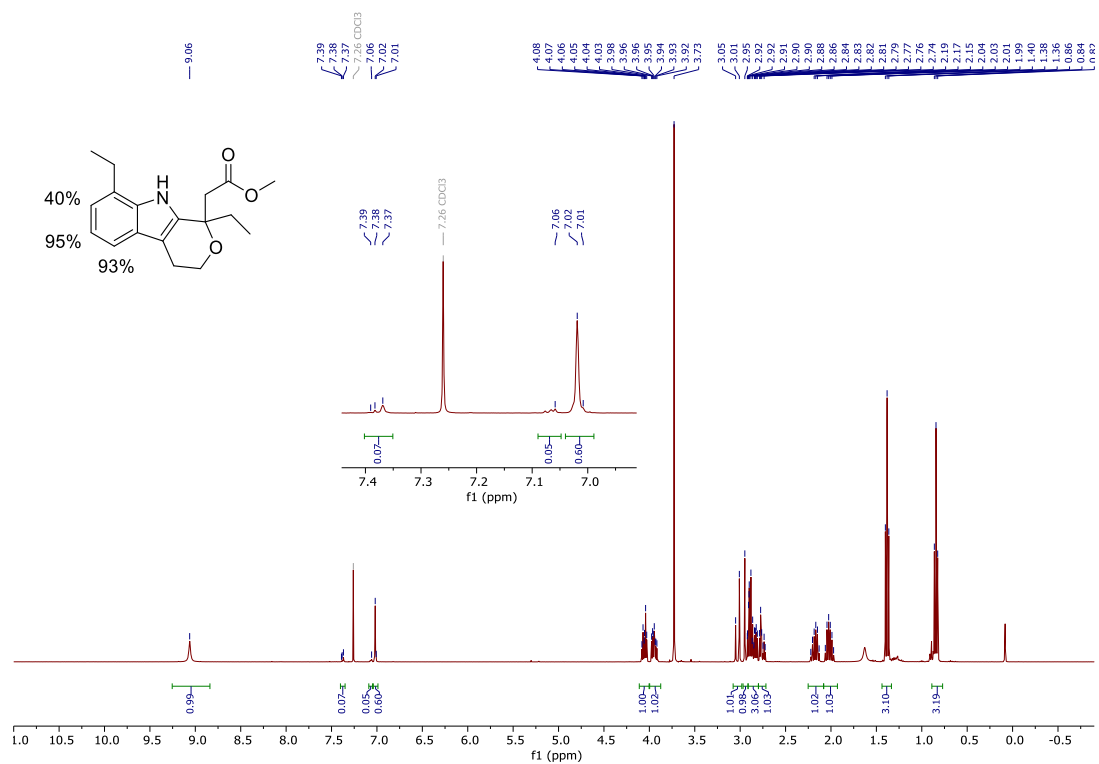

### <sup>13</sup>C-NMR spectrum in CDCl<sub>3</sub>:

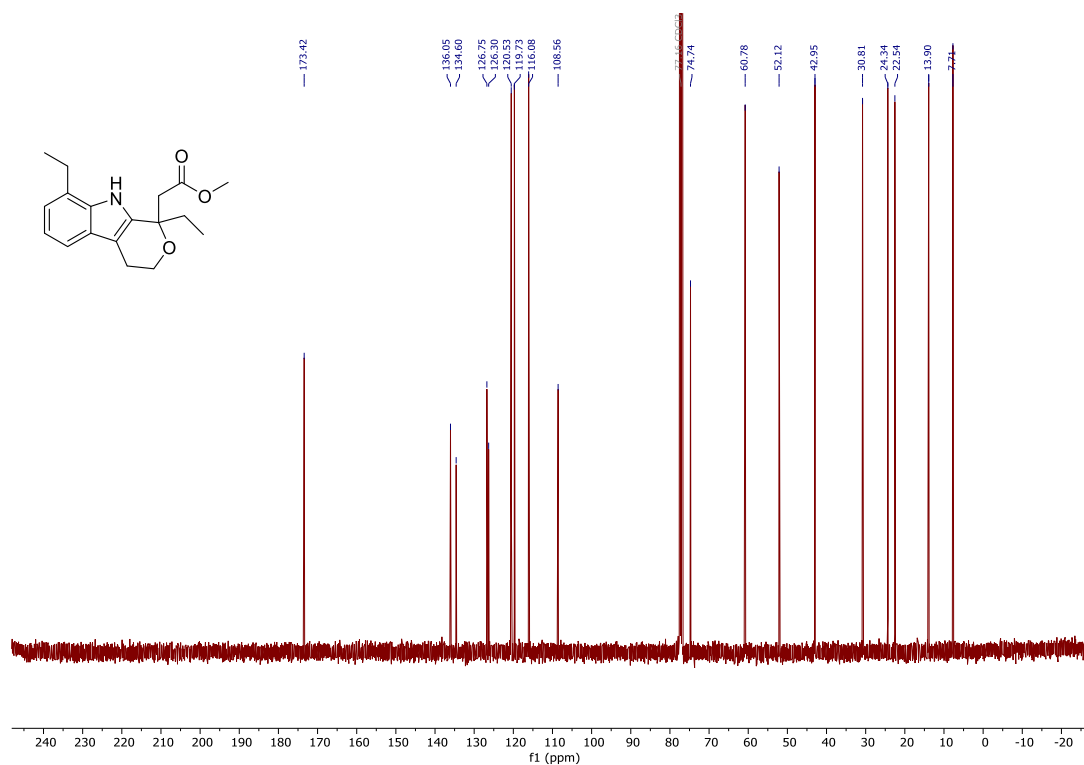

### <sup>13</sup>C-NMR spectrum in CDCl<sub>3</sub>:

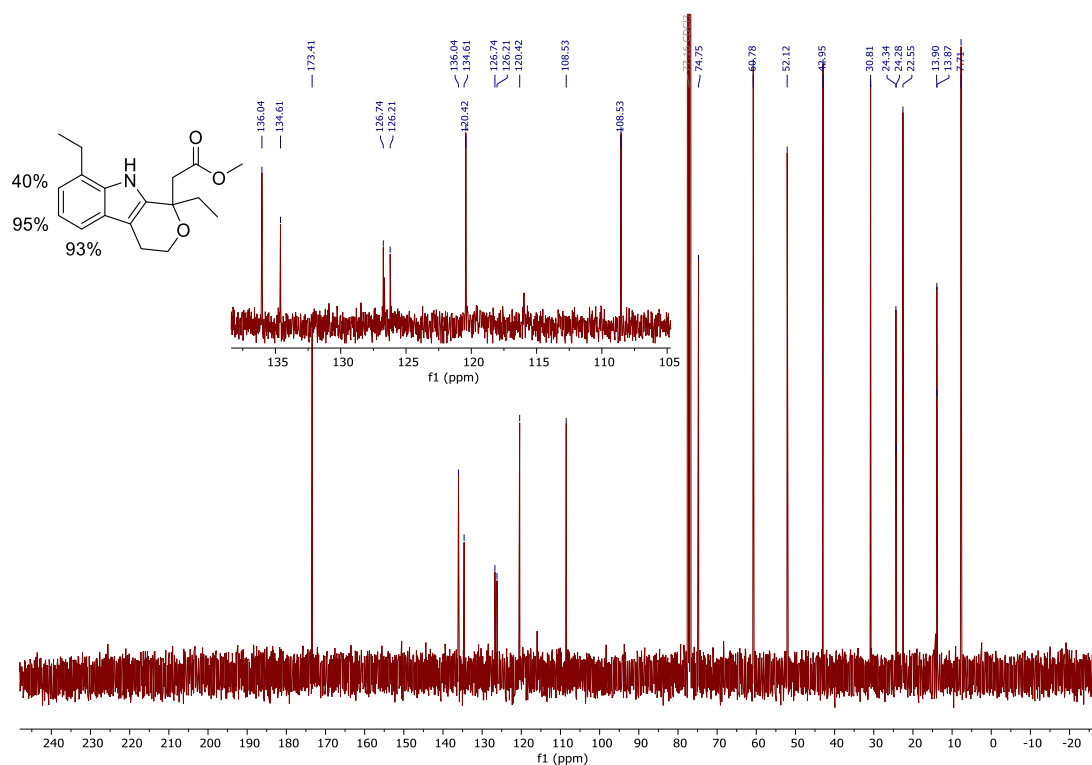

## Deuteration of methyl 2-(6-methoxynaphthalen-2-yl)propanoate (**34**):

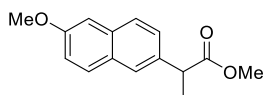

Following the general procedure E and using methyl 2-(6-methoxynaphthalen-2-yl)propanoate (**34**) (48.9 mg, 0.200 mmol), and purification via silica gel column chromatography using pentane:EtOAc = 4:1 as the eluent, the target compound [**D**]**34** was obtained as colorless solid (40.2 mg, 80%). The degree of deuteration was determined by mass spectrometry.

**Deuterium Incorporation:** 5.54 D/molecule [HRMS]; 5.68 D/molecule [<sup>1</sup>H-NMR].

### NMR Data of Starting Material:

<sup>1</sup>H NMR (600 MHz, CDCl<sub>3</sub>) δ = 7.70 (d, *J* = 8.6 Hz, 2H), 7.66 (d, *J* = 1.6 Hz, 1H), 7.40 (dd, *J* = 8.4, 1.8 Hz, 1H), 7.14 (dd, *J* = 8.9, 2.5 Hz, 1H), 7.11 (d, *J* = 2.5 Hz, 1H), 3.91 (s, 3H), 3.86 (q, *J* = 7.3 Hz, 1H), 3.67 (s, 3H), 1.60-1.56 (m, 3H) ppm.

<sup>13</sup>C NMR (150 MHz, CDCl<sub>3</sub>) δ = 175.3, 157.8, 135.8, 133.9, 129.4, 129.1, 127.3, 126.3, 126.1, 119.1, 105.8, 55.5, 52.2, 45.5, 18.7 ppm.

### NMR Data of Product:

<sup>1</sup>H NMR (400 MHz, CDCl<sub>3</sub>) δ = 7.71 (s, 0.09H, 91.0-95.5% D), 7.67 (s, 0.05H, 95% D), 7.41 (s, 0.08H, 92% D), 7.15 (s, 0.05H, 95% D), 7.12 (s, 0.05H, 95% D), 3.91 (s, 3H), 3.87 (q, *J* = 7.2 Hz, 1H), 3.67 (s, 3H), 1.59 (d, *J* = 7.2 Hz, 3H) ppm.

<sup>13</sup>C NMR (150 MHz, CDCl<sub>3</sub>) δ = 175.3, 157.7, 135.6, 133.7, 129.7-128.1 (2C), 127.7-124.8 (3C), 119.5-117.7 (1C), 106.5-104.6 (1C), 55.4, 52.2, 45.4, 18.7 ppm.

### Mass Data:

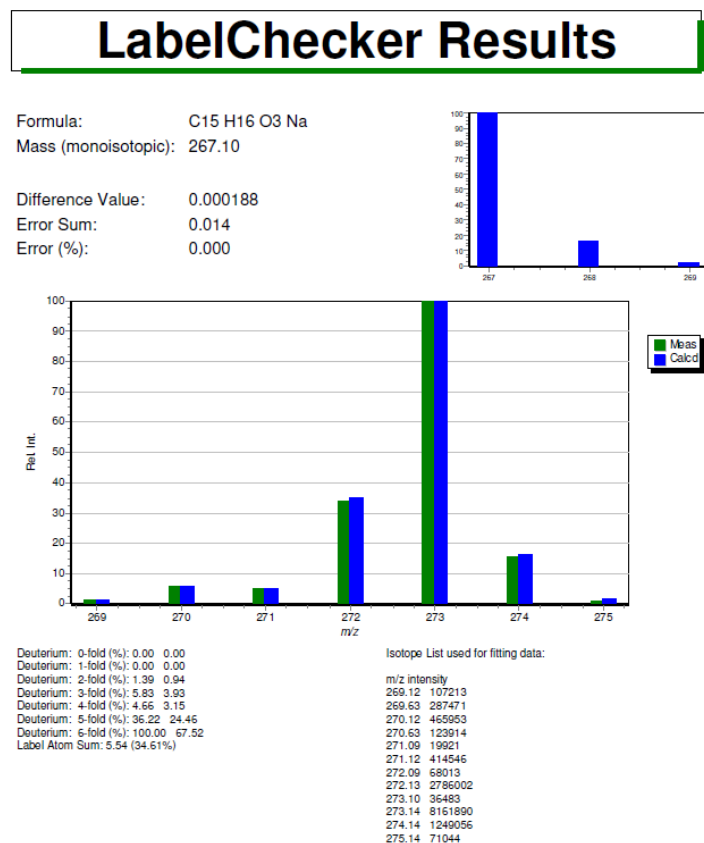



### <sup>1</sup>H-NMR spectrum in CDCl<sub>3</sub>:

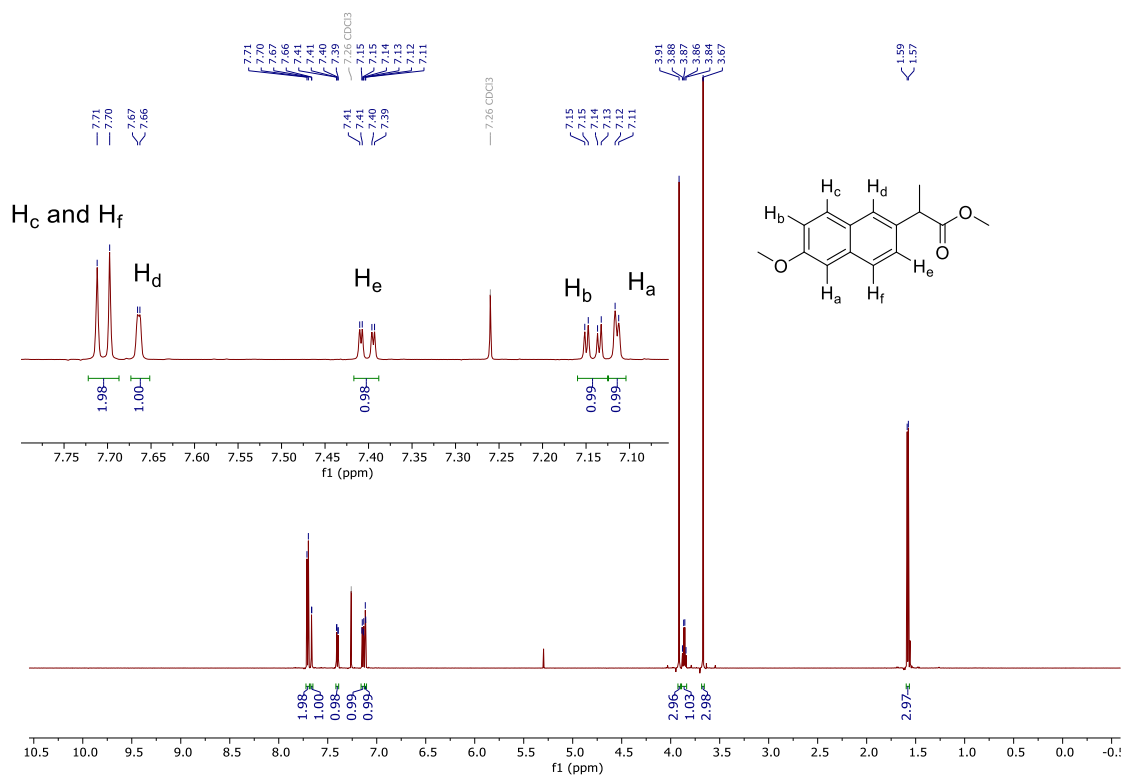

### <sup>1</sup>H-NMR spectrum in CDCl<sub>3</sub>:

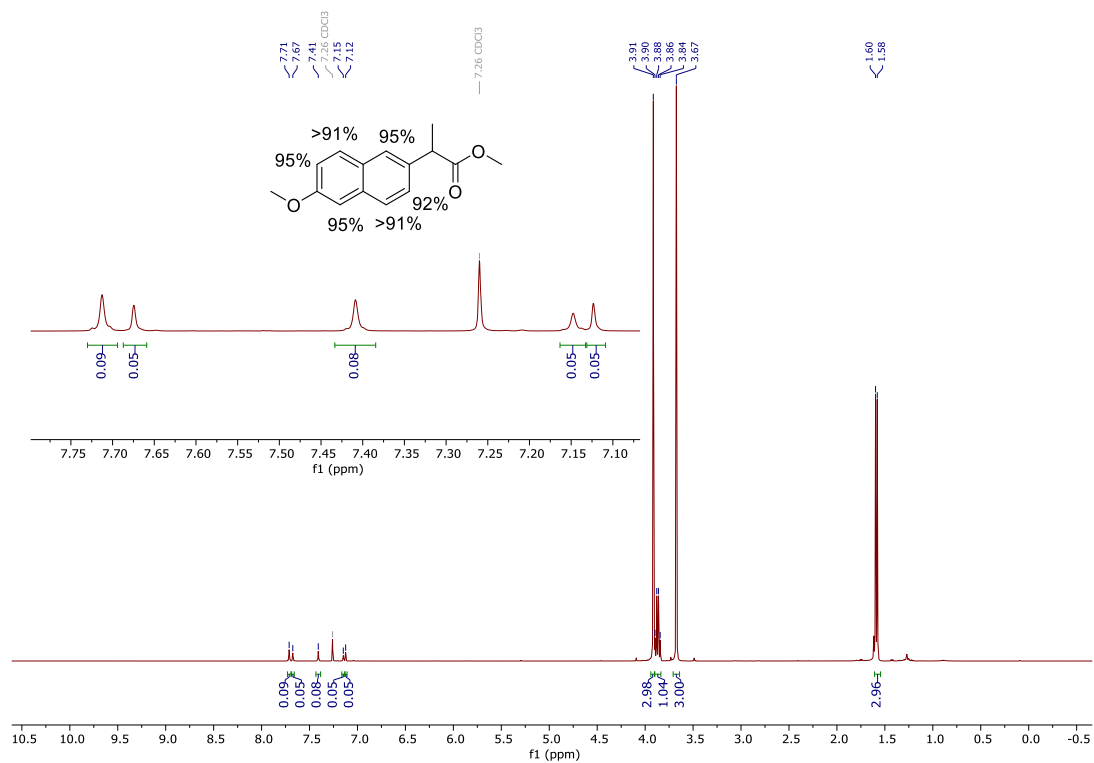

**<sup>13</sup>C-NMR spectrum in CDCl<sub>3</sub>:**

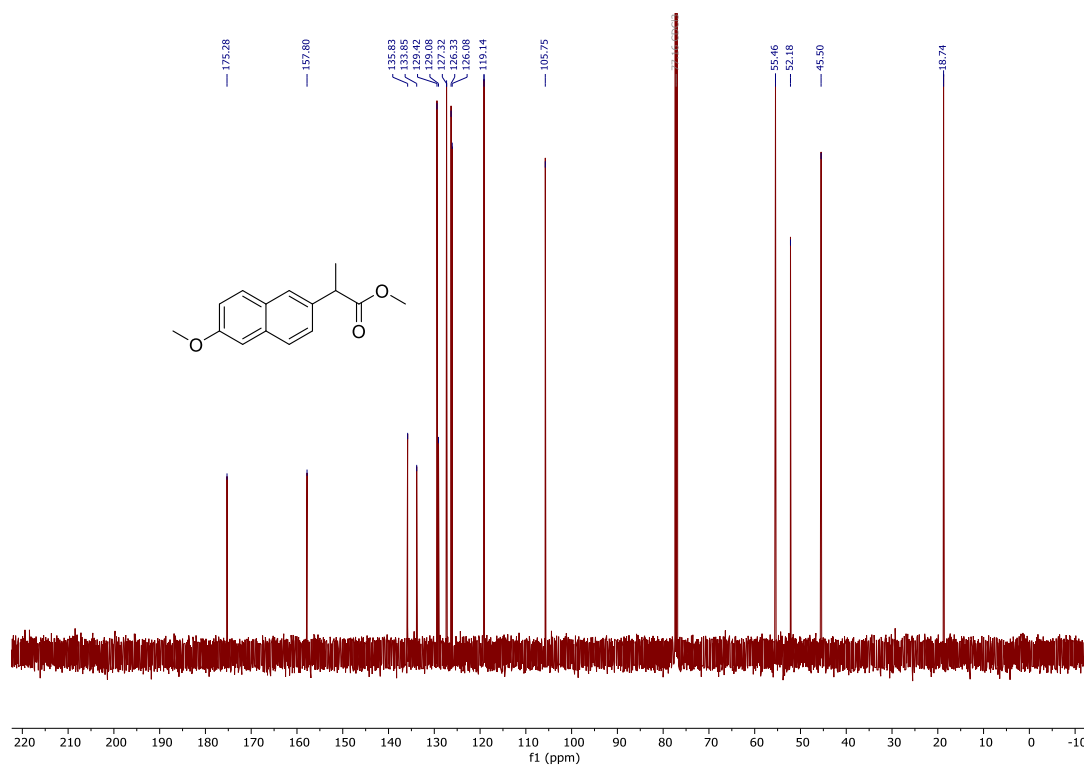

**<sup>13</sup>C-NMR spectrum in CDCl<sub>3</sub>:**

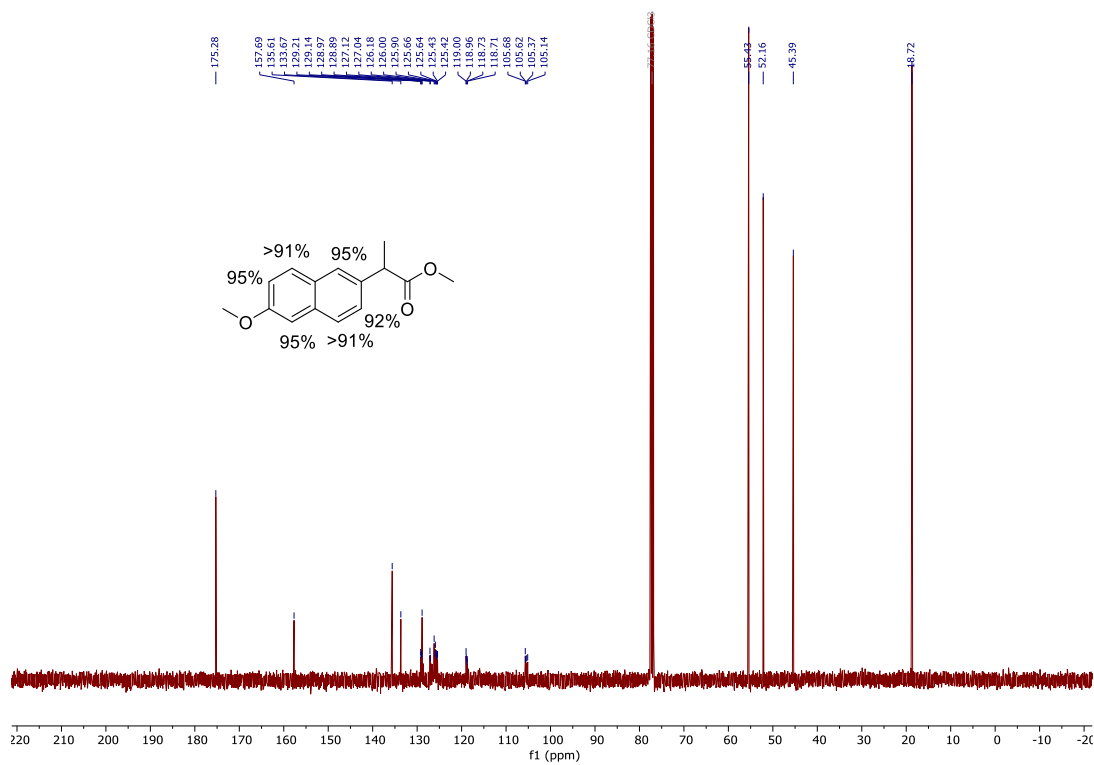

## Deuteration of methyl 2-(3-benzoylphenyl)propanoate (**35**):

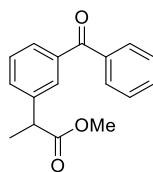

Following the general procedure F and using methyl 2-(3-benzoylphenyl)propanoate (**35**) (53.7 mg, 0.200 mmol), and purification via silica gel column chromatography using pentane:EtOAc = 9:1 as the eluent, the target compound [**D**]**35** was obtained as colorless solid (34.7 mg, 63%). The degree of deuteration was determined by mass spectrometry.

**Deuterium Incorporation:** 7.25 D/molecule [Mass]; 7.37 D/molecule [<sup>1</sup>H-NMR].

### NMR Data of Starting Material:

<sup>1</sup>H NMR (599 MHz, CDCl<sub>3</sub>) δ = 7.82-7.78 (m, 2H), 7.75 (t, *J* = 1.8 Hz, 1H), 7.68 (dt, *J* = 7.7, 1.4 Hz, 1H), 7.62-7.57 (m, 1H), 7.54 (dt, *J* = 7.7, 1.6 Hz, 1H), 7.48 (t, *J* = 7.8 Hz, 2H), 7.44 (t, *J* = 7.7 Hz, 1H), 3.81 (q, *J* = 7.2 Hz, 1H), 3.68 (s, 3H), 1.54 (d, *J* = 7.2 Hz, 3H) ppm.

<sup>13</sup>C NMR (151 MHz, CDCl<sub>3</sub>) δ = 196.6, 174.7, 141.0, 138.1, 137.7, 132.6, 131.6, 130.2, 129.4, 129.2, 128.7, 128.4, 52.3, 45.4, 18.6 ppm.

### NMR Data of Product:

<sup>1</sup>H NMR (400 MHz, CDCl<sub>3</sub>) δ = 7.80 (s, 0.12H, 94% D), 7.75 (s, 0.80H, 20% D), 7.68 (s, 0.05H, 95% D), 7.59 (s, 0.06H, 94% D), 7.54 (s, 0.44H, 56% D), 7.48 (s, 0.11H, 94% D), 7.45-7.41 (m, 0.06H, 94% D), 3.81 (q, *J* = 7.2 Hz, 1H), 3.68 (s, 3H), 1.54 (d, *J* = 7.2 Hz, 3H) ppm.

<sup>13</sup>C NMR (101 MHz, CDCl<sub>3</sub>) δ = 196.6, 174.7, 140.9 (d, *J* = 8.4 Hz), 138.0, 137.5, 132.6-127.5 (9C), 52.3, 45.4 (d, *J* = 4.4 Hz), 18.6 ppm.

### Mass Data:

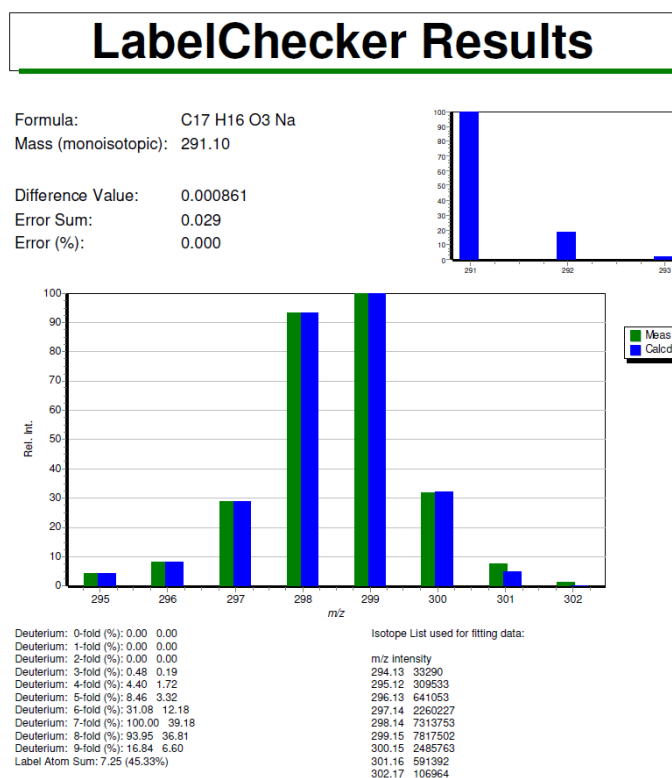

# <sup>1</sup>H-NMR spectrum in CDCl<sub>3</sub>:

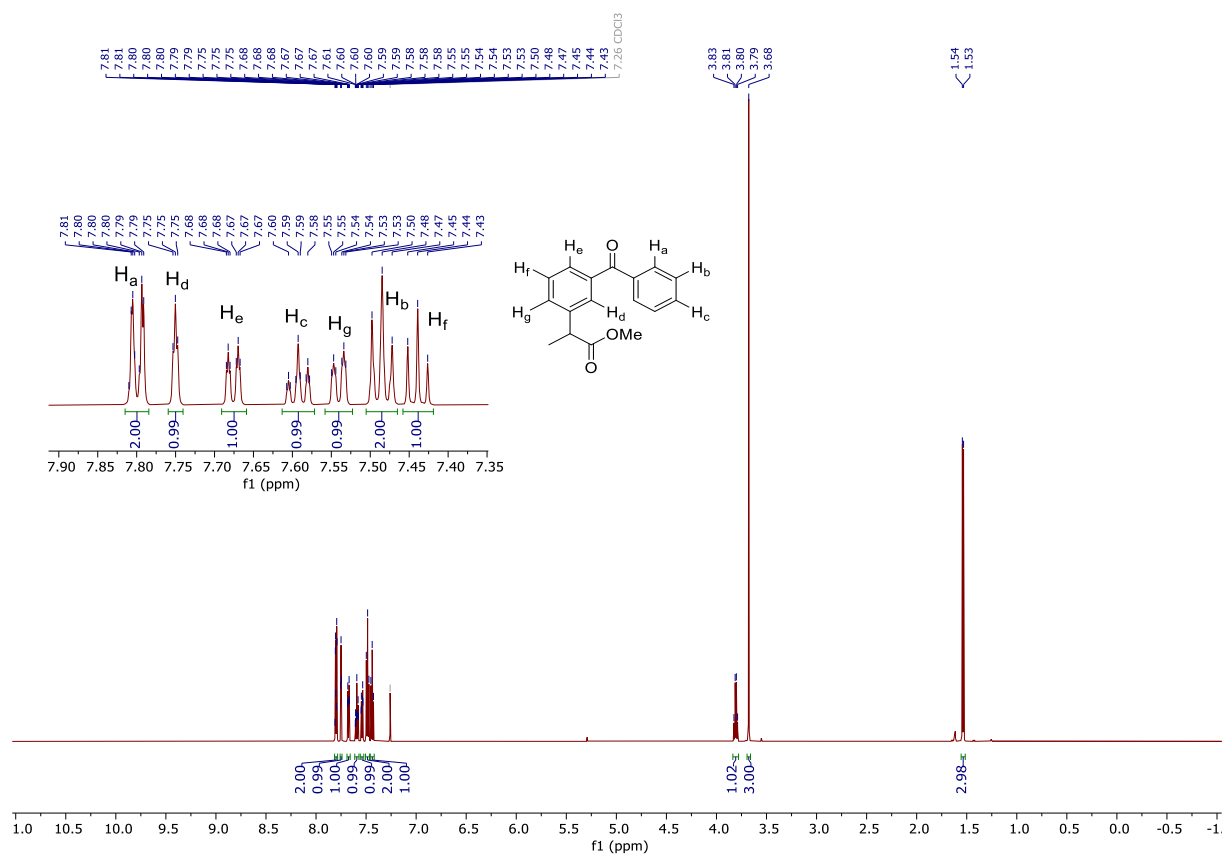

# <sup>1</sup>H-NMR spectrum in CDCl<sub>3</sub>:

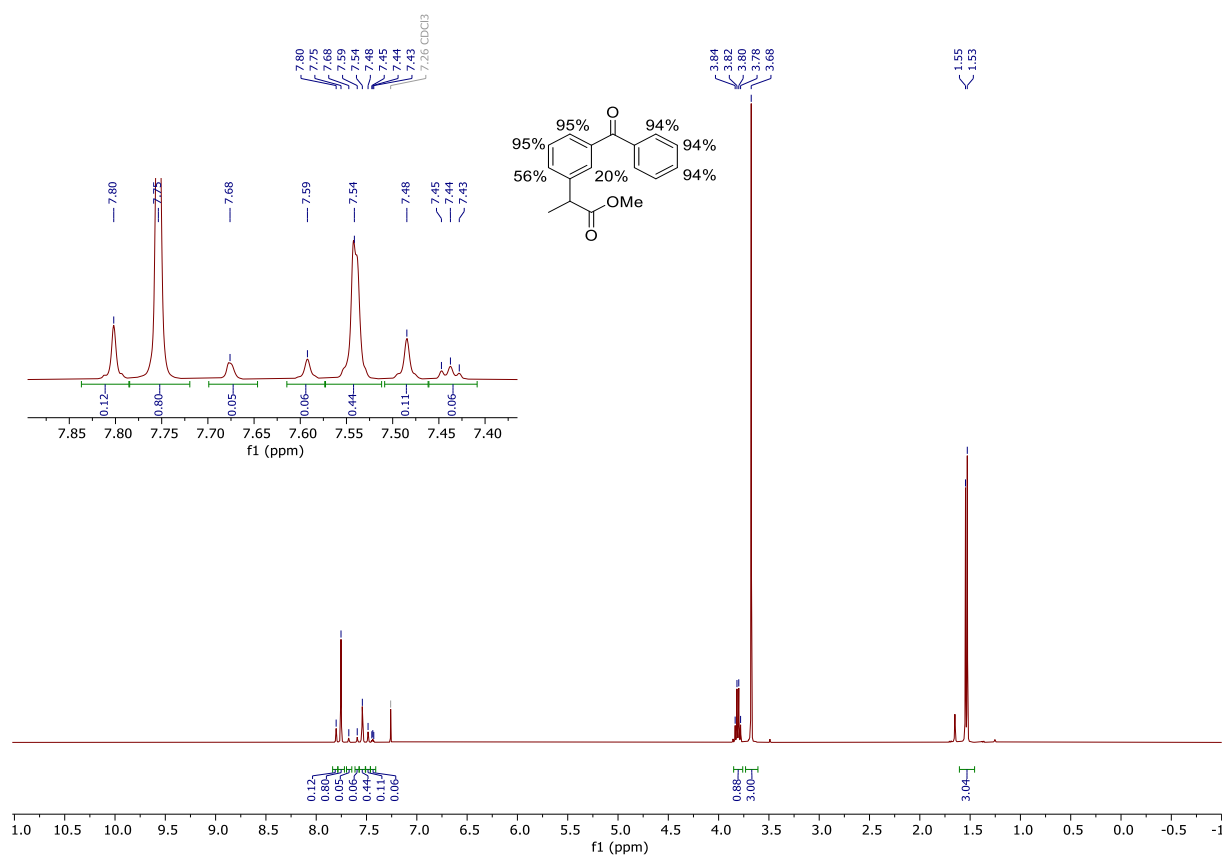

### <sup>13</sup>C-NMR spectrum in CDCl<sub>3</sub>:

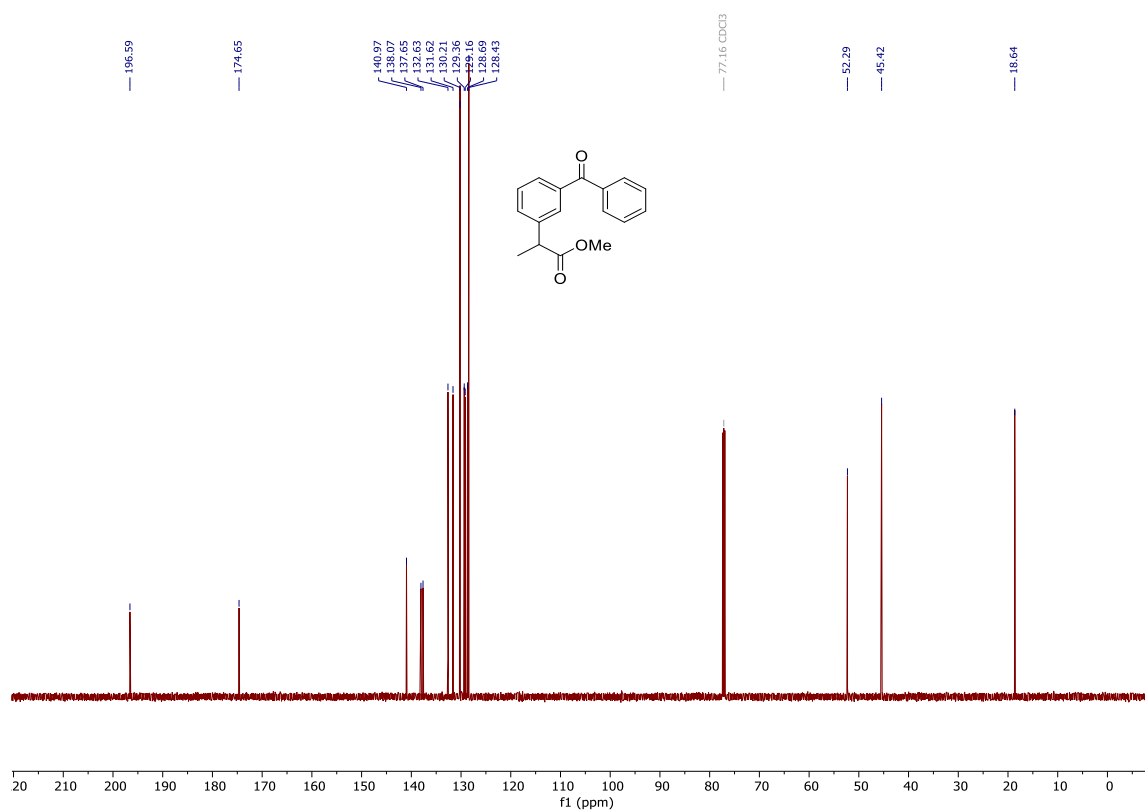

### <sup>13</sup>C-NMR spectrum in CDCl<sub>3</sub>:

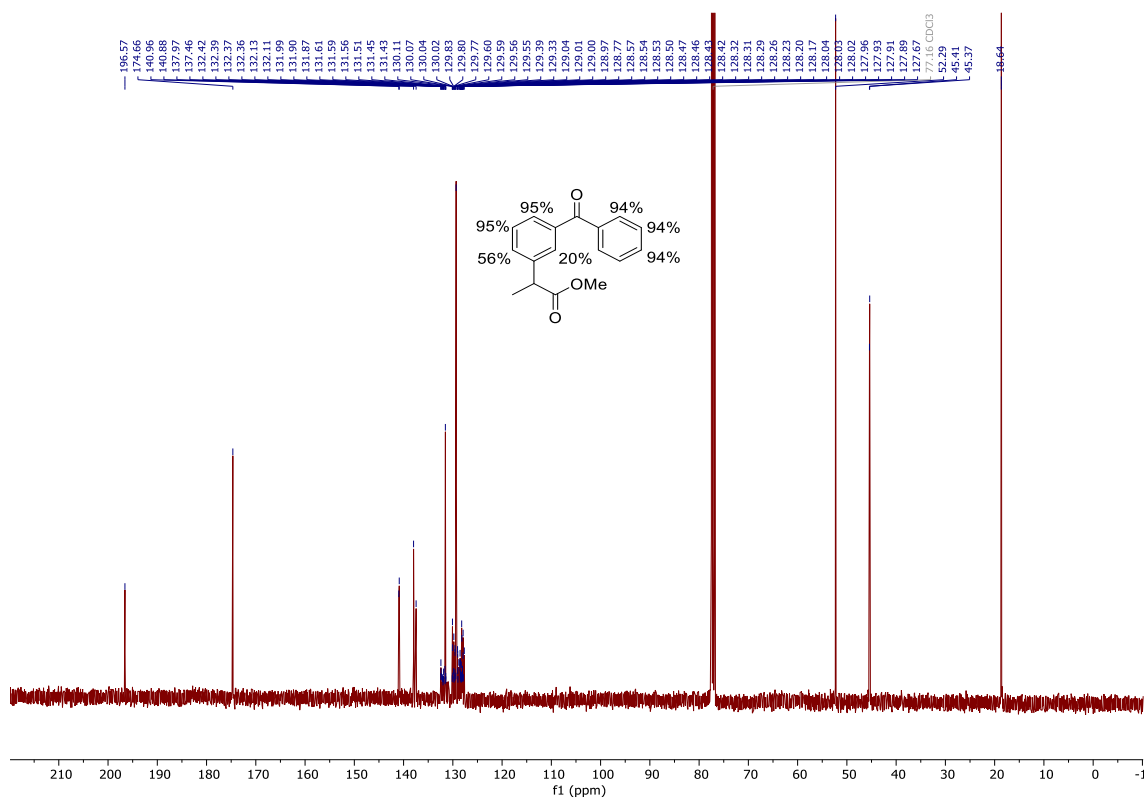

### Deuteration of methyl 2-(2-fluoro-[1,1'-biphenyl]-4-yl)propanoate (**36**):

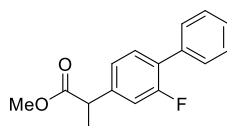

Following the general procedure F and using methyl 2-(2-fluoro-[1,1'-biphenyl]-4-yl)propanoate (**36**) (51.7 mg, 0.200 mmol), and purification via silica gel column chromatography using pentane:EtOAc = 9:1 as the eluent, the target compound [**D**]**36** was obtained as colorless solid (43.7 mg, 82%). The degree of deuteration was determined by mass spectrometry.

**Deuterium Incorporation:** 7.57 D/molecule [Mass]; 7.59 D/molecule [<sup>1</sup>H-NMR].

#### NMR Data of Starting Material:

<sup>1</sup>H NMR (599 MHz, CDCl<sub>3</sub>) δ = 7.56-7.52 (m, 2H), 7.44 (t, *J* = 7.7 Hz, 2H), 7.40 (t, *J* = 8.0 Hz, 1H), 7.38-7.35 (m, 1H), 7.15 (dd, *J* = 7.9, 1.8 Hz, 1H), 7.13 (dd, *J* = 11.4, 1.7 Hz, 1H), 3.77 (q, *J* = 7.2 Hz, 1H), 3.71 (s, 3H), 1.54 (d, *J* = 7.2 Hz, 3H) ppm.

<sup>13</sup>C NMR (151 MHz, CDCl<sub>3</sub>) δ = 174.6, 159.8 (d, *J* = 248.4 Hz), 142.0 (d, *J* = 7.6 Hz), 135.6 (d, *J* = 1.3 Hz), 131.0 (d, *J* = 4.0 Hz), 129.1 (d, *J* = 3.0 Hz), 128.6, 128.0 (d, *J* = 13.6 Hz), 127.8, 123.7 (d, *J* = 3.4 Hz), 115.4 (d, *J* = 23.7 Hz), 52.4, 45.1 (d, *J* = 1.5 Hz), 18.6 ppm.

<sup>19</sup>F NMR (564 MHz, CDCl<sub>3</sub>) δ = -117.6 ppm

#### NMR Data of Product:

<sup>1</sup>H NMR (400 MHz, CDCl<sub>3</sub>) δ = 7.54 (s, 0.10H, 95% D), 7.44 (s, 0.10H, 95% D), 7.42-7.38 (m, 0.05H, 95% D), 7.37 (s, 0.05H, 95% D), 7.17-7.14 (m, 0.08H, 92% D), 7.11 (s, 0.03H, 97% D), 3.77 (q, *J* = 7.2 Hz, 1H), 3.71 (s, 3H), 1.55 (d, *J* = 7.2 Hz, 3H) ppm.

<sup>13</sup>C NMR (101 MHz, CDCl<sub>3</sub>) δ = 174.6, 159.8 (d, *J* = 248.1 Hz), 141.8 (d, *J* = 7.8 Hz), 135.4, 131.3-130.0 (1C), 129.4-126.8 (5C), 123.8-122.6 (1C), 115.8-114.2 (1C), 52.4, 45.0 (d, *J* = 1.6 Hz), 18.6 ppm.

<sup>19</sup>F NMR (377 MHz, CDCl<sub>3</sub>) δ = -117.7, -118.0 ppm.<sup>2</sup>

<sup>2</sup> The <sup>19</sup>F-NMR spectrum shows the presence of a trace impurity with a signal at δ = -61.8 ppm.

## Mass Data:

# LabelChecker Results

Formula: C<sub>16</sub>H<sub>15</sub>O<sub>2</sub>FNa

Mass (monoisotopic): 281.10

Difference Value: 0.000144

Error Sum: 0.012

Error (%): 0.054

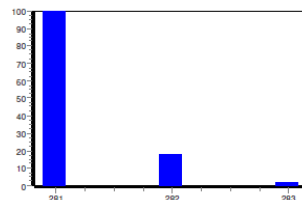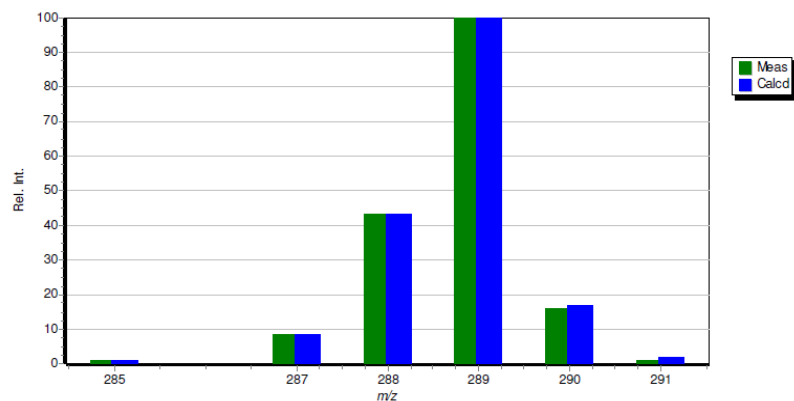

Deuterium: 0-fold (%): 0.00 0.00  
Deuterium: 1-fold (%): 0.00 0.00  
Deuterium: 2-fold (%): 0.00 0.00  
Deuterium: 3-fold (%): 0.00 0.00  
Deuterium: 4-fold (%): 1.05 0.68  
Deuterium: 5-fold (%): 0.00 0.00  
Deuterium: 6-fold (%): 9.08 5.85  
Deuterium: 7-fold (%): 45.03 29.02  
Deuterium: 8-fold (%): 100.00 64.44  
Deuterium: 9-fold (%): 0.00 0.00  
Deuterium: 10-fold (%): 0.00 0.00  
Label Atom Sum: 7.57 (50.44%)

Isotope List used for fitting data:

| m/z    | intensity |
|--------|-----------|
| 285.13 | 40352     |
| 287.13 | 338602    |
| 288.14 | 1733693   |
| 289.14 | 4018966   |
| 290.15 | 642062    |
| 291.15 | 43857     |

### <sup>1</sup>H-NMR spectrum in CDCl<sub>3</sub>:

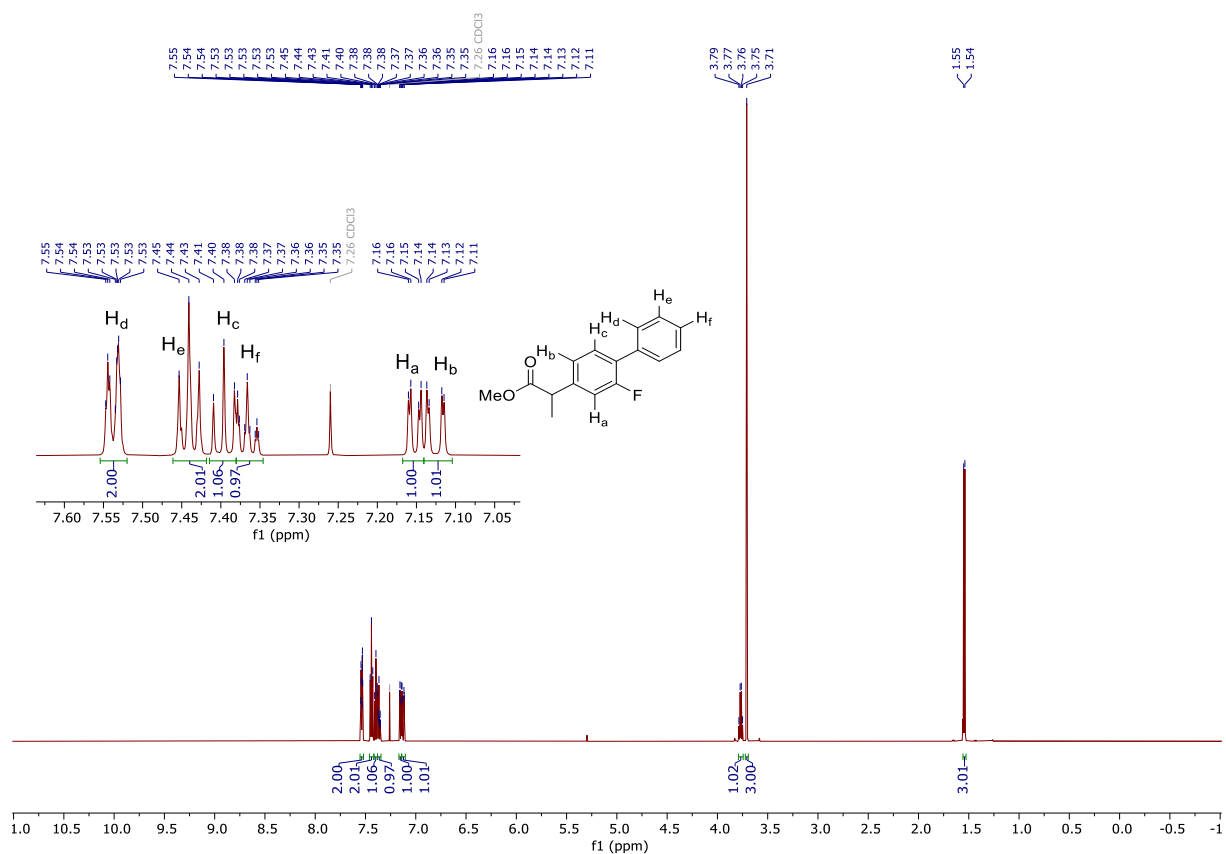

### <sup>1</sup>H-NMR spectrum in CDCl<sub>3</sub>:

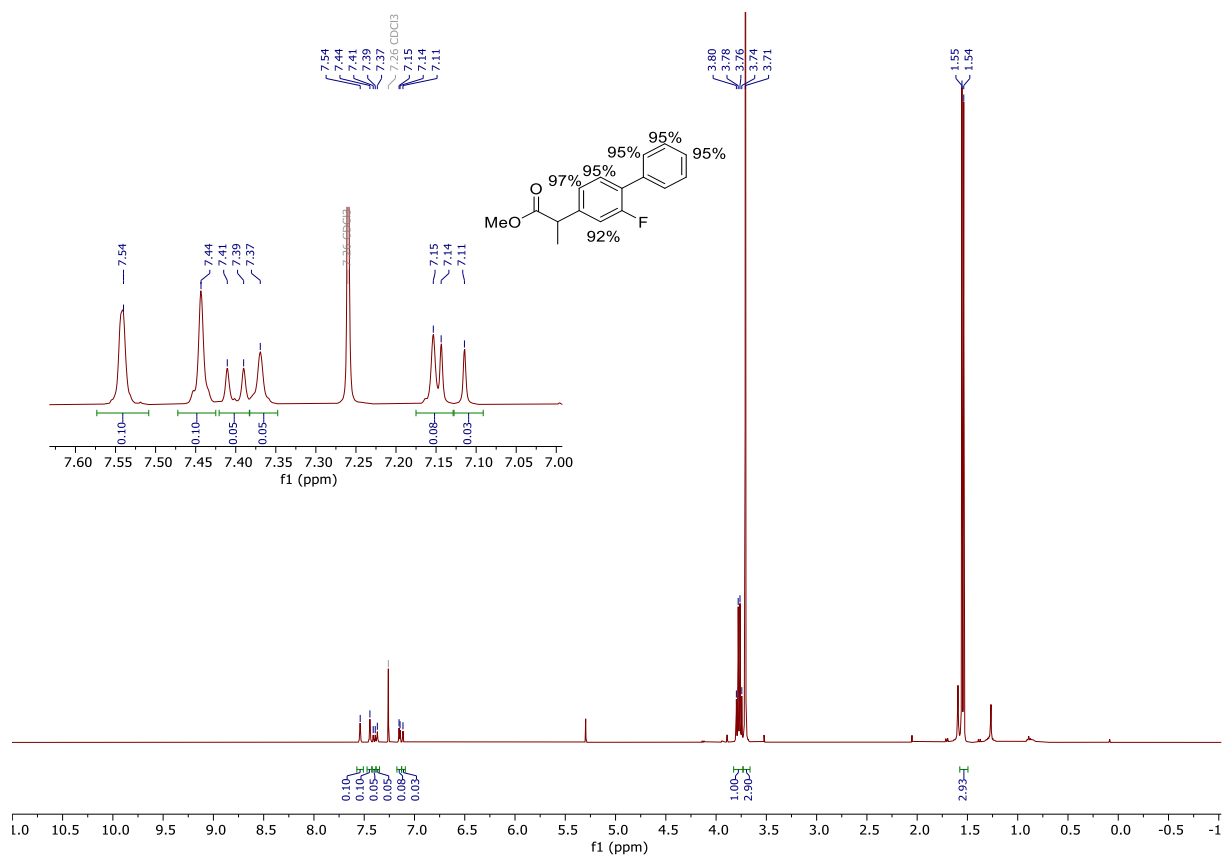



### <sup>13</sup>C-NMR spectrum in CDCl<sub>3</sub>:

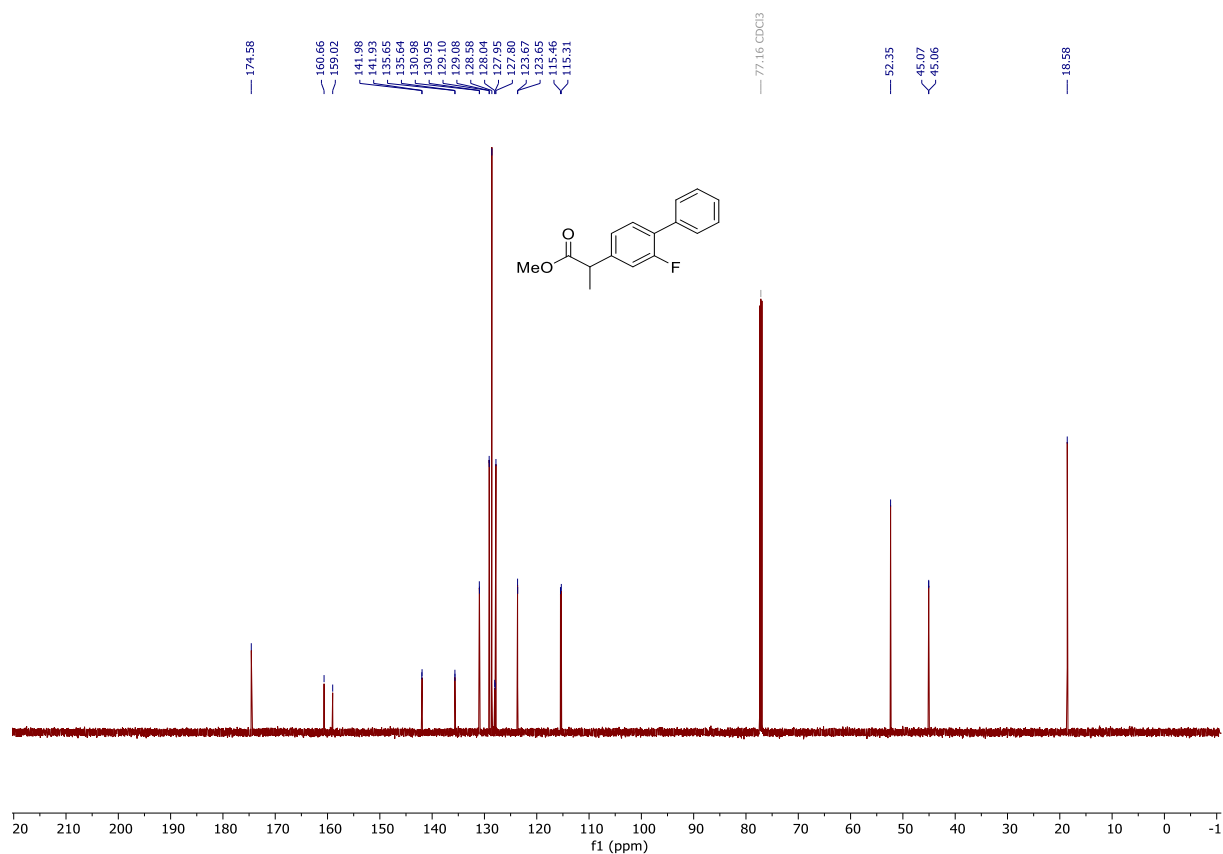

### <sup>13</sup>C-NMR spectrum in CDCl<sub>3</sub>:

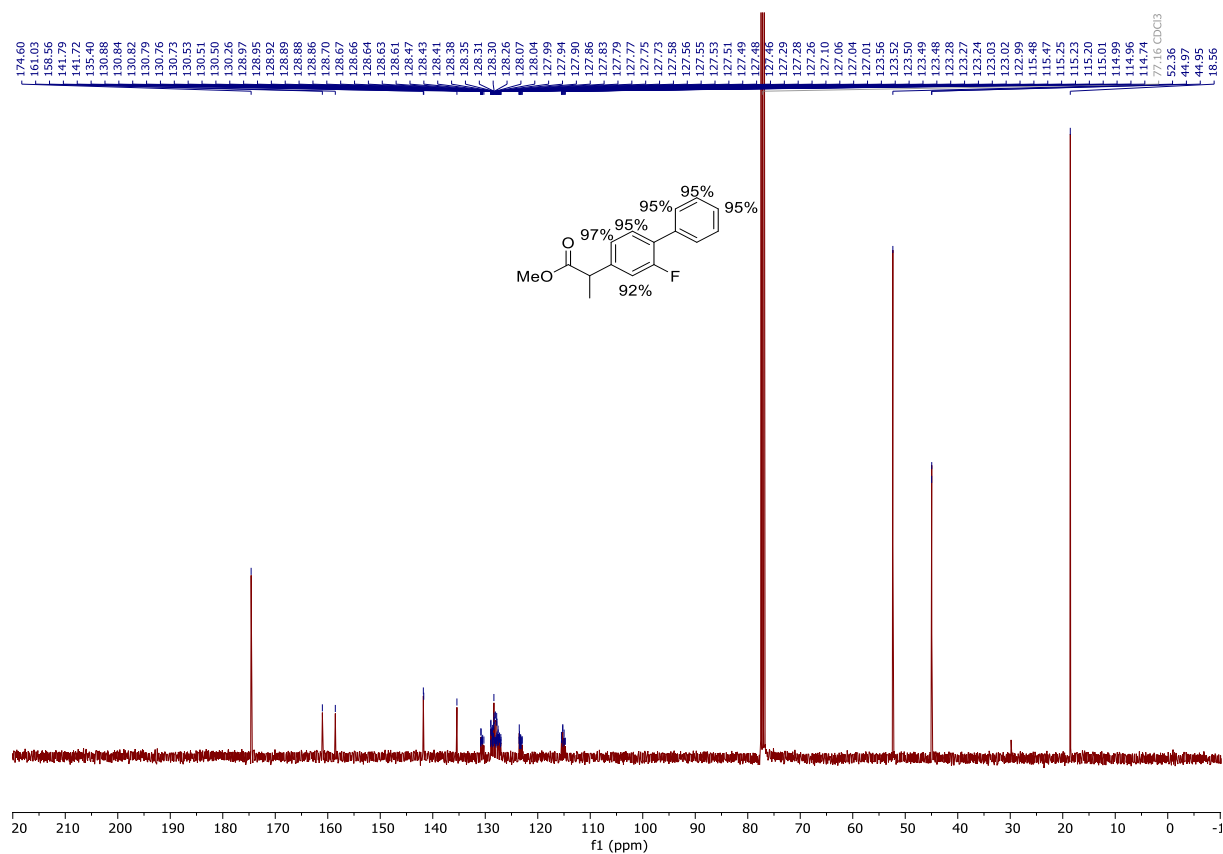

**$^{19}\text{F}$ -NMR spectrum in  $\text{CDCl}_3$ :**

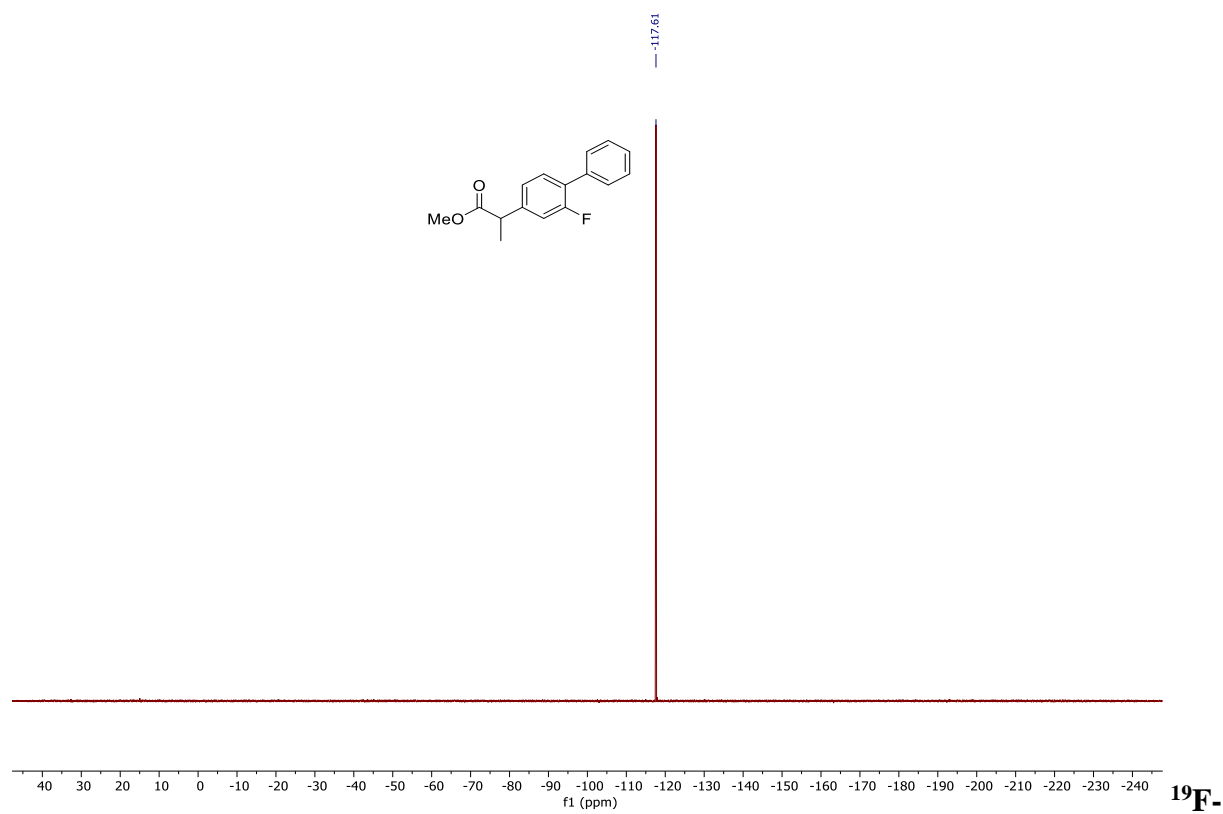

**NMR spectrum in  $\text{CDCl}_3$ :**

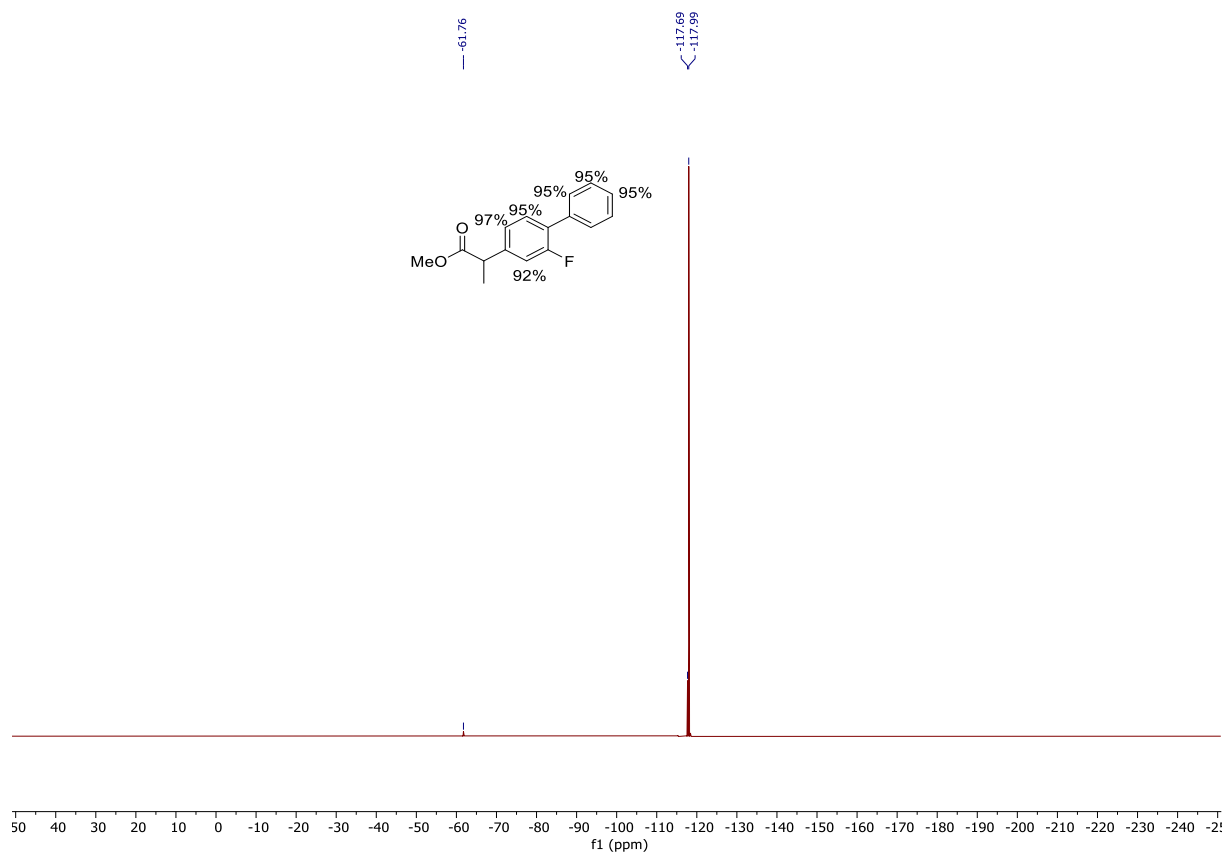

## Deuteration of methyl 4-([1,1'-biphenyl]-4-yl)-4-oxobutanoate (**37**):

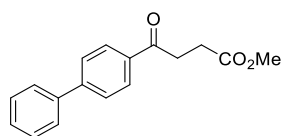

Following the general procedure F and using methyl 4-([1,1'-biphenyl]-4-yl)-4-oxobutanoate (**37**) (53.7 mg, 0.200 mmol), and purification via silica gel column chromatography using pentane:EtOAc = 9:1 as the eluent, the target compound [**D**]**37** was obtained as colorless solid (33.3 mg, 60%). The degree of deuteration was determined by mass spectrometry.

**Deuterium Incorporation:** 9.88 D/molecule [Mass]; 9.99 D/molecule [<sup>1</sup>H-NMR].

### NMR Data of Starting Material:

<sup>1</sup>H NMR (599 MHz, CDCl<sub>3</sub>) δ = 8.08-8.04 (m, 2H), 7.72-7.67 (m, 2H), 7.65-7.61 (m, 2H), 7.50-7.45 (m, 2H), 7.43-7.38 (m, 1H), 3.72 (s, 3H), 3.36 (t, *J* = 6.7 Hz, 2H), 2.80 (t, *J* = 6.7 Hz, 2H) ppm.

<sup>13</sup>C NMR (151 MHz, CDCl<sub>3</sub>) δ = 197.8, 173.5, 146.1, 140.0, 135.4, 129.1, 128.8, 128.4, 127.4, 52.0, 33.6, 28.2 ppm.

### NMR Data of Product:

<sup>1</sup>H NMR (400 MHz, CDCl<sub>3</sub>) δ = 8.06 (s, 0.43H, 79% D), 7.73-7.66 (m, 0.11H, 95% D), 7.63 (s, 0.11H, 95% D), 7.47 (s, 0.11H, 95% D), 7.41 (s, 0.05H, 95% D), 3.72 (s, 3H), 3.42-3.25 (m, 0.21H, 90% D), 2.79 (s, 2H) ppm.

<sup>13</sup>C NMR (101 MHz, CDCl<sub>3</sub>) δ = 197.9, 173.5, 145.8, 139.7, 135.2, 129.9-125.6 (9C), 52.0, 34.8-31.6 (1C), 28.2 ppm.

### Mass Data:

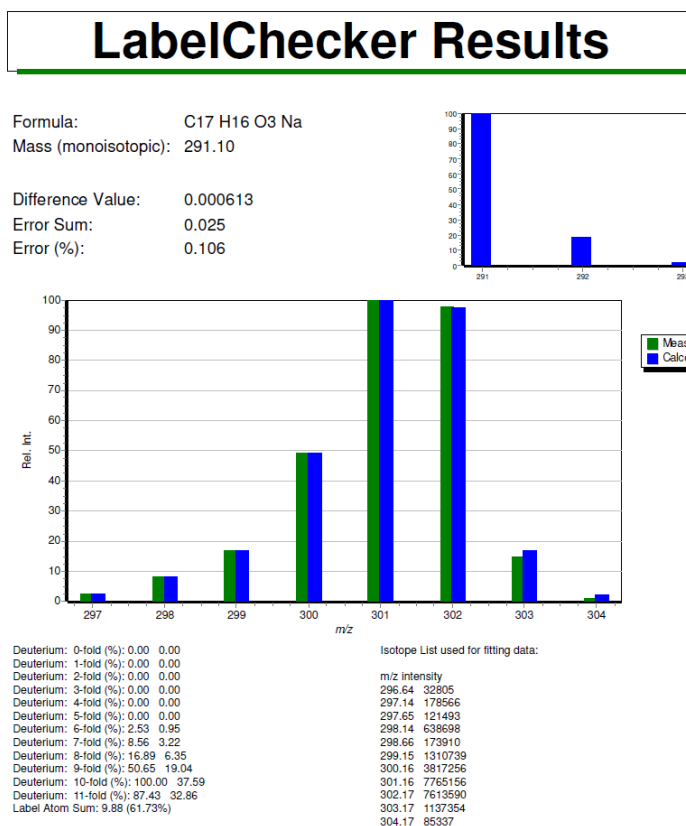

### <sup>1</sup>H-NMR spectrum in CDCl<sub>3</sub>:

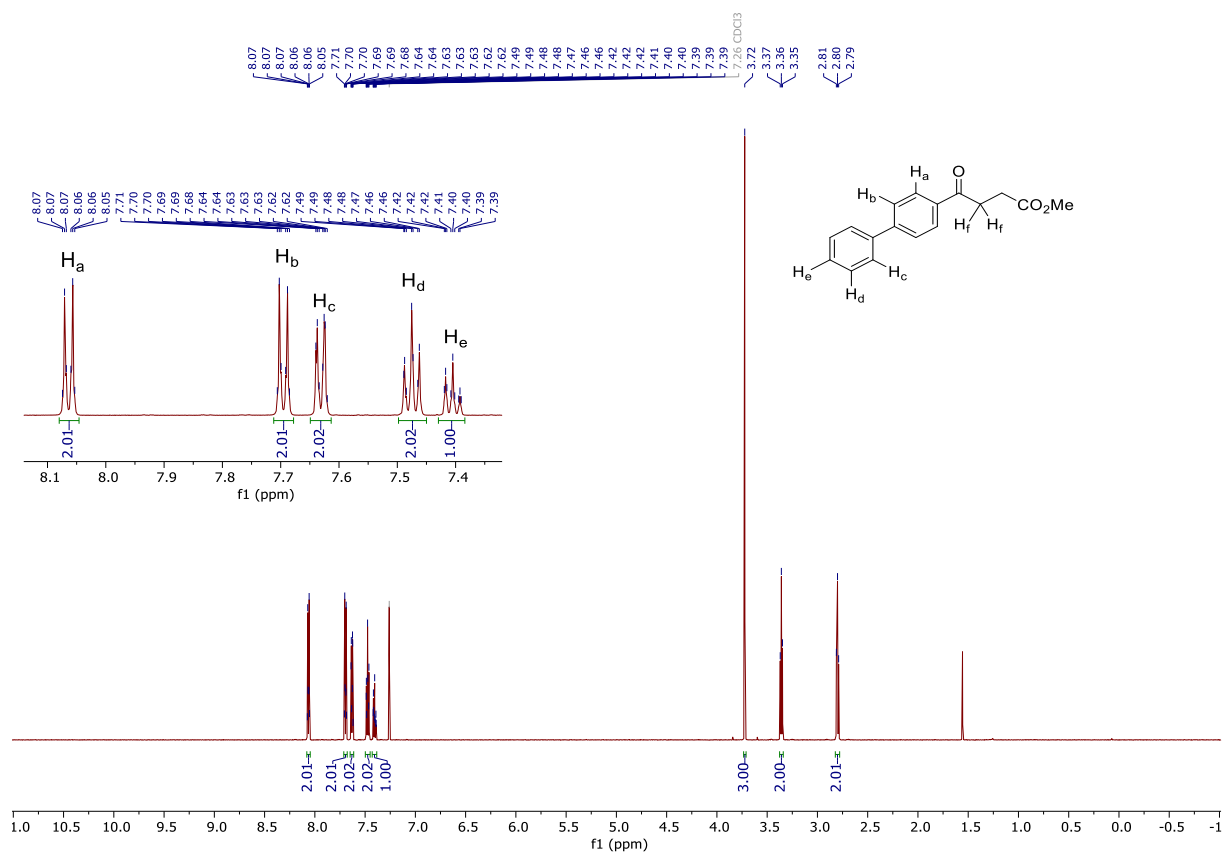

### <sup>1</sup>H-NMR spectrum in CDCl<sub>3</sub>:

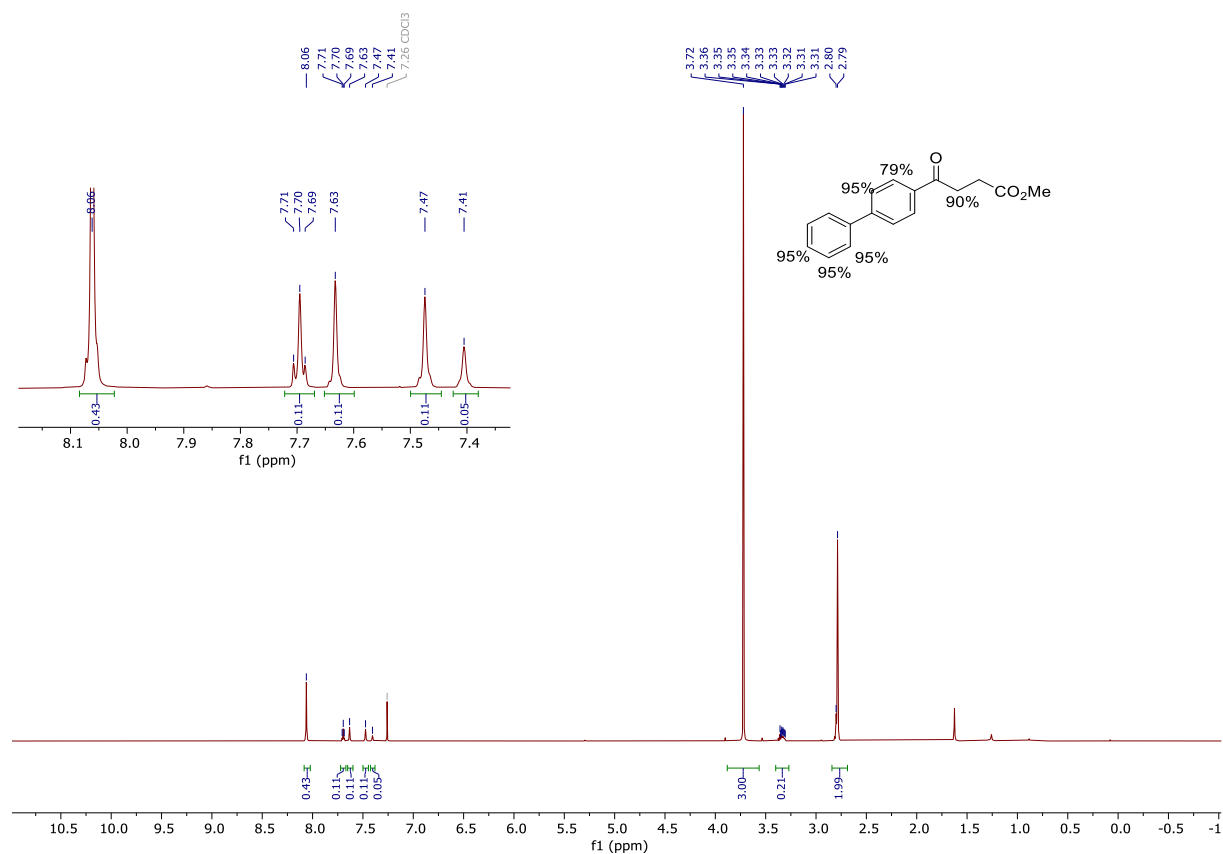

### <sup>13</sup>C-NMR spectrum in CDCl<sub>3</sub>:

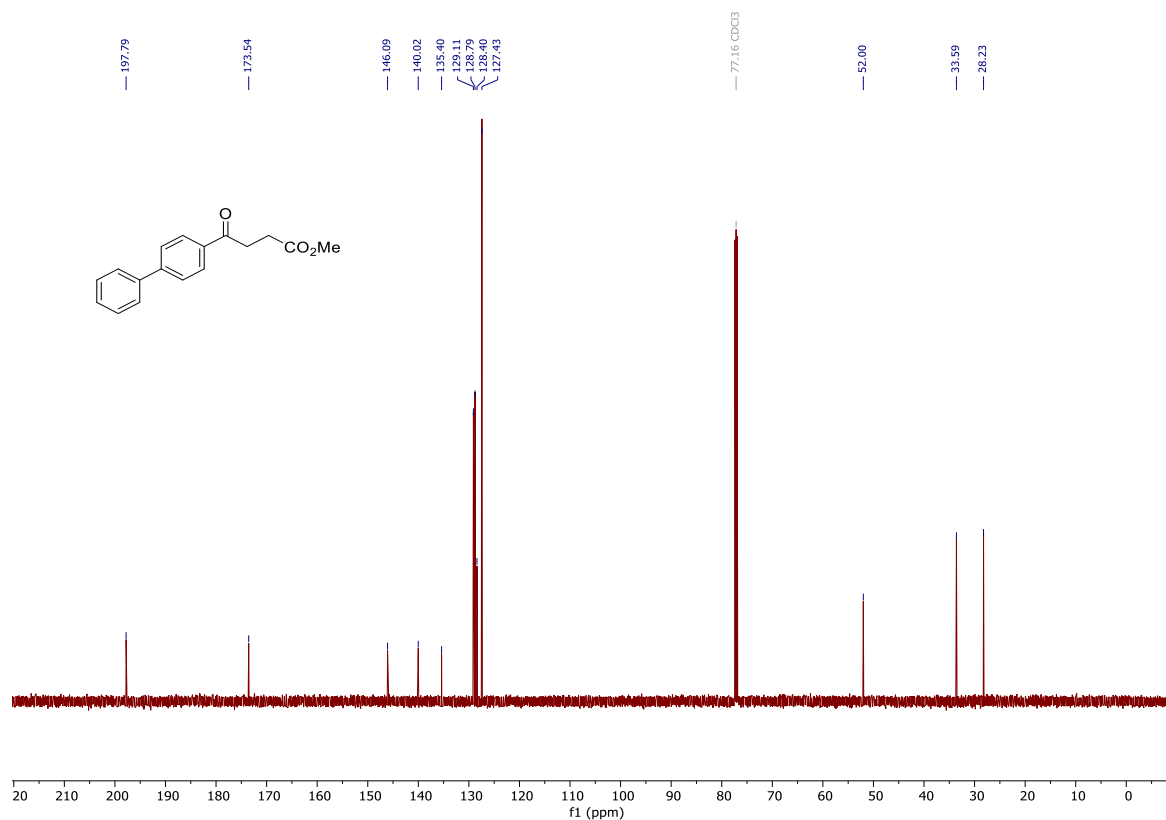

### <sup>13</sup>C-NMR spectrum in CDCl<sub>3</sub>:

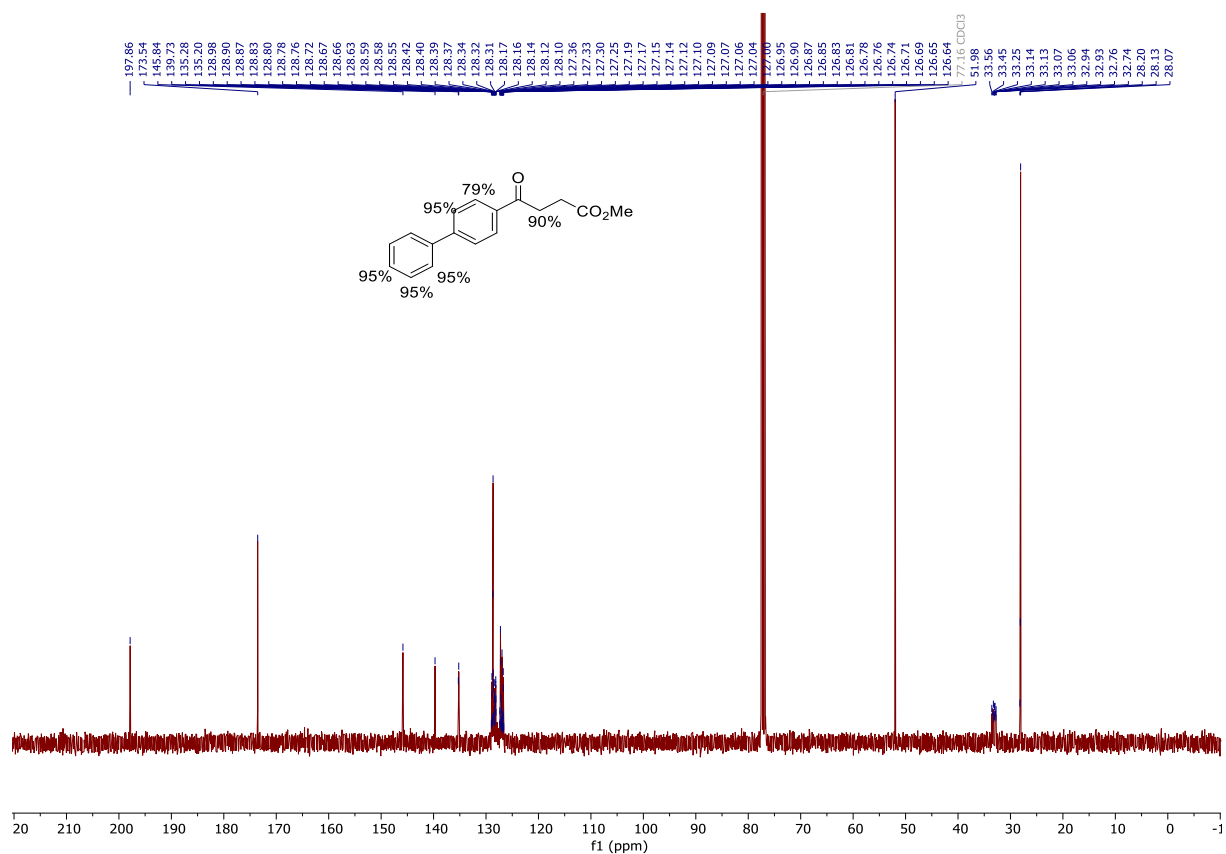

### Deuteration of methyl 2',4'-difluoro-4-methoxy-[1,1'-biphenyl]-3-carboxylate (**38**):

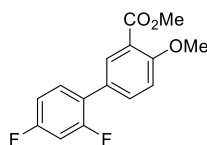

Following the general procedure F and using methyl 2',4'-difluoro-4-methoxy-[1,1'-biphenyl]-3-carboxylate (**38**) (55.7 mg, 0.200 mmol), and purification via silica gel column chromatography using pentane:EtOAc = 9:1 as the eluent, the target compound [**D**]**38** was obtained as light-yellow solid (51.5 mg, 91%). The degree of deuteration was determined by mass spectrometry.

**Deuterium Incorporation:** 5.10D/molecule [Mass]; 5.16 D/molecule [<sup>1</sup>H-NMR].

#### NMR Data of Starting Material:

<sup>1</sup>H NMR (599 MHz, CDCl<sub>3</sub>) δ = 7.93 (dd, *J* = 2.4, 1.2 Hz, 1H), 7.62 (ddd, *J* = 8.7, 2.4, 1.8 Hz, 1H), 7.38 (td, *J* = 8.7, 6.3 Hz, 1H), 7.05 (d, *J* = 8.7 Hz, 1H), 6.96-6.92 (m, 1H), 6.92-6.88 (m, 1H), 3.95 (s, 3H), 3.91 (s, 3H) ppm.

<sup>13</sup>C NMR (151 MHz, CDCl<sub>3</sub>) δ = 166.5, 162.4, 159.8, 158.9, 134.0, 132.2, 131.3, 127.1, 124.1, 120.3, 112.3, 111.8, 104.5, 56.3, 52.3 ppm.

<sup>19</sup>F NMR (564 MHz, CDCl<sub>3</sub>) δ = -111.4 - -111.5 (m), -113.7 - -113.8 (m) ppm

#### NMR Data of Product:

<sup>1</sup>H NMR (400 MHz, CDCl<sub>3</sub>) δ = 7.93 (d, *J* = 1.2 Hz, 0.53H, 47% D), 7.62 (s, 0.08H, 92% D), 7.38 (dd, *J* = 8.7, 6.6 Hz, 0.08H, 92% D), 7.05 (s, 0.05H, 95% D), 6.94 (d, *J* = 8.0 Hz, 0.06H, 94%), 6.90 (dd, *J* = 10.7, 8.9 Hz, 0.04H, 96%), 3.95 (s, 3H), 3.91 (s, 3H) ppm.

<sup>13</sup>C NMR (101 MHz, CDCl<sub>3</sub>) δ = 166.5 (d, *J* = 2.2 Hz), 163.5-161.0 (1C), 159.5-157.7 (2C), 135.2-132.8 (1C), 132.2 (d, *J* = 2.7 Hz), 131.2-130.1 (1C), 127.8-125.9 (1C), 124.9-122.5 (1C), 120.2 (d, *J* = 9.7 Hz), 113.5-110.3 (2C), 105.7-102.4 (1C), 56.3, 52.3 ppm.

<sup>19</sup>F NMR (377 MHz, CDCl<sub>3</sub>) δ = -111.6 - -111.7 (m), -111.8 - -112.2 (m), -113.7 - -113.9 (m), -114.0 - -114.3 (m) ppm.<sup>3</sup>

<sup>3</sup> The <sup>19</sup>F-NMR spectrum shows the presence of trace impurities with signals at: δ = -59.3, -61.8, -61.9, -73.1, -73.2, -75.6 (d, *J* = 1.3 Hz) ppm.

## Mass Data:

# LabelChecker Results

Formula: C<sub>15</sub> H<sub>12</sub> O<sub>3</sub> F<sub>2</sub> Na  
Mass (monoisotopic): 301.07

Difference Value: 0.000362  
Error Sum: 0.019  
Error (%): 0.239

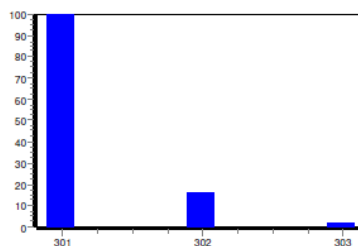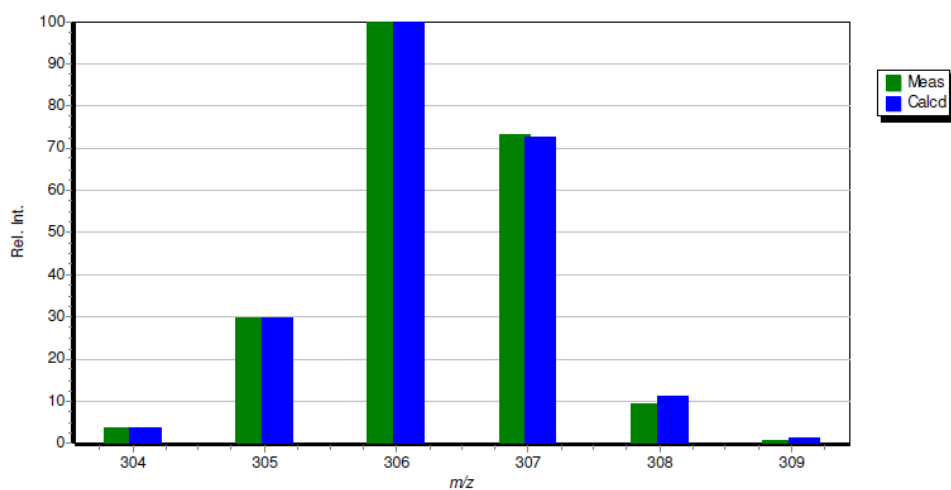

Deuterium: 0-fold (%): 0.00 0.00  
Deuterium: 1-fold (%): 0.00 0.00  
Deuterium: 2-fold (%): 0.30 0.16  
Deuterium: 3-fold (%): 3.98 2.05  
Deuterium: 4-fold (%): 30.67 15.75  
Deuterium: 5-fold (%): 100.00 51.36  
Deuterium: 6-fold (%): 59.73 30.68  
Label Atom Sum: 5.10 (42.53%)

Isotope List used for fitting data:

| m/z    | Intensity |
|--------|-----------|
| 303.08 | 23541     |
| 304.08 | 364893    |
| 305.09 | 2810844   |
| 306.10 | 9418557   |
| 307.10 | 6904133   |
| 308.11 | 883481    |
| 309.11 | 58565     |

# <sup>1</sup>H-NMR spectrum in CDCl<sub>3</sub>:

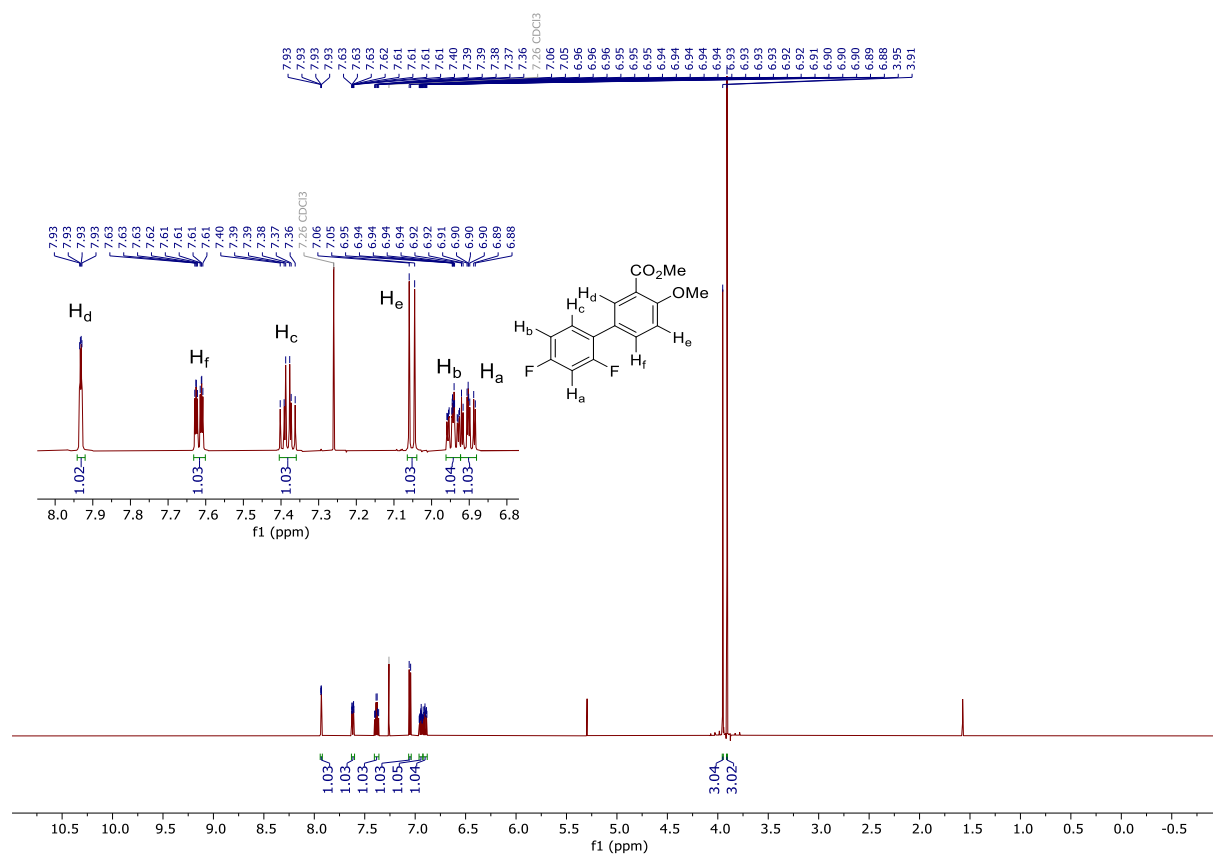

# <sup>1</sup>H-NMR spectrum in CDCl<sub>3</sub>:

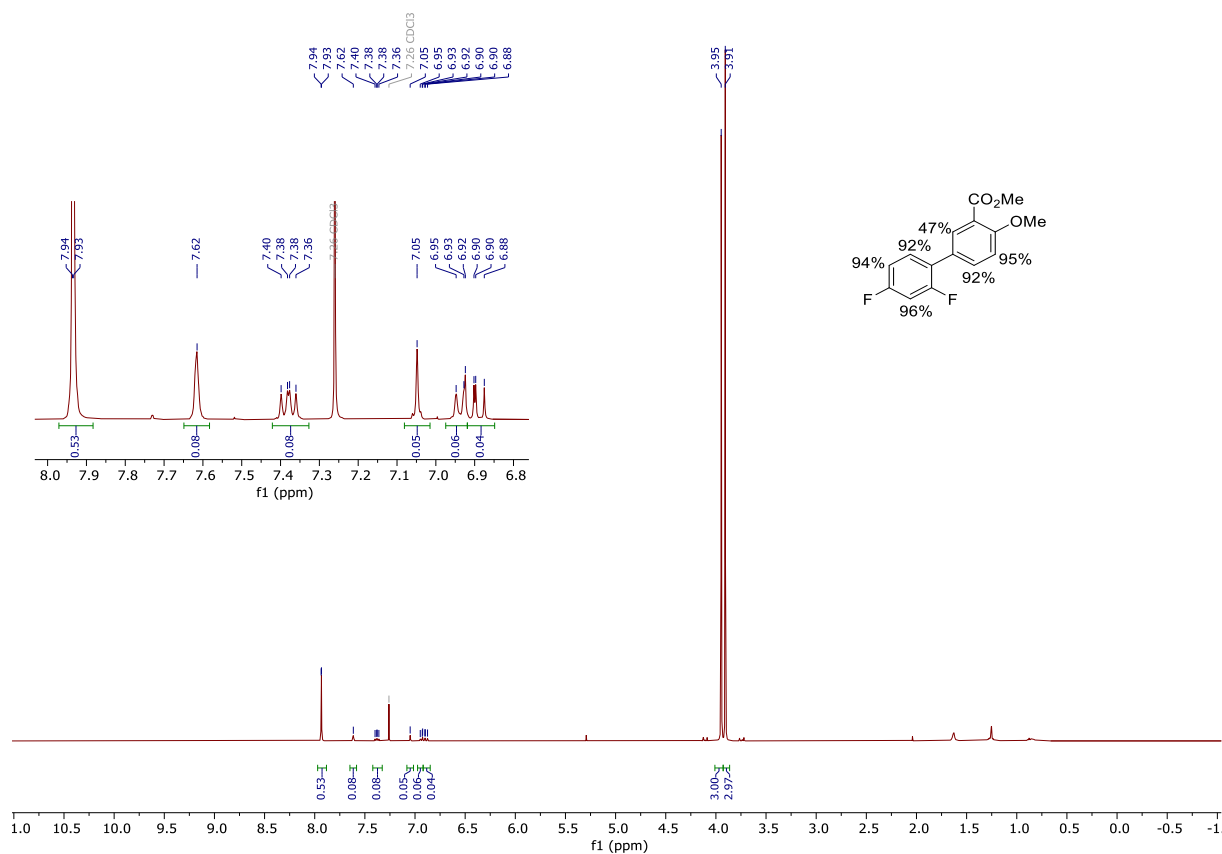





**<sup>19</sup>F-NMR spectrum in CDCl<sub>3</sub>:**

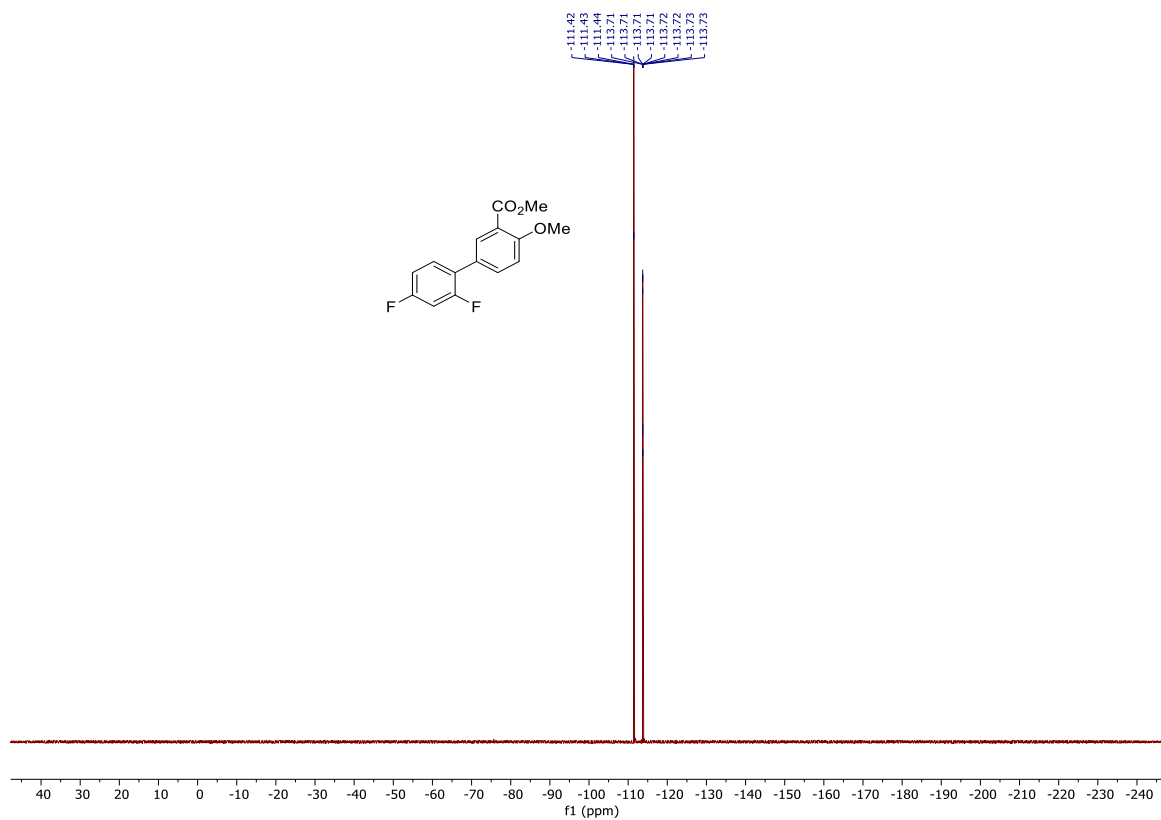

**<sup>19</sup>F-NMR spectrum in CDCl<sub>3</sub>:**

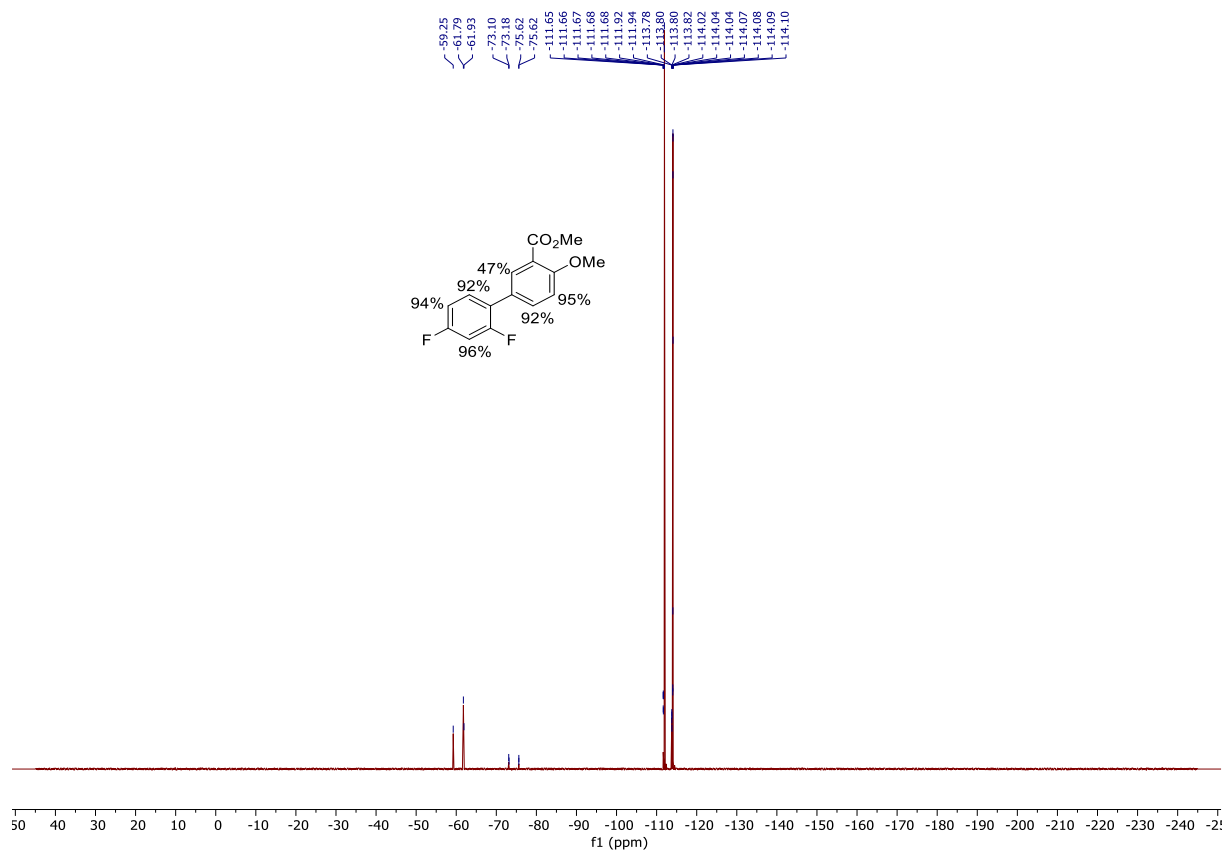

## Deuteration of methyl 2-(11-oxo-6,11-dihydrodibenzo[*b,e*]oxepin-2-yl)acetate (**39**):

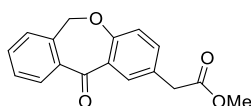

Following the general procedure F and using methyl 2-(11-oxo-6,11-dihydrodibenzo[*b,e*]oxepin-2-yl)acetate (**39**) (56.5 mg, 0.200 mmol), and purification via silica gel column chromatography using pentane:EtOAc = 80:20 as the eluent, the target compound [**D**]39 was obtained as colorless liquid (42.8 mg, 75%). The degree of deuteration was determined by mass spectrometry.

**Deuterium Incorporation:** 3.46 D/molecule [HRMS]; 3.58 D/molecule [<sup>1</sup>H-NMR].

### NMR Data of Starting Material:

<sup>1</sup>H NMR (400 MHz, CDCl<sub>3</sub>) δ = 8.11 (d, *J* = 2.4 Hz, 1H), 7.89 (dd, *J* = 7.6, 1.4 Hz, 1H), 7.59-7.52 (m, 1H), 7.50-7.44 (m, 1H), 7.42 (dd, *J* = 8.4, 2.4 Hz, 1H), 7.36 (d, *J* = 7.4 Hz, 1H), 7.03 (d, *J* = 8.4 Hz, 1H), 5.18 (s, 2H), 3.70 (s, 3H), 3.65 (s, 2H) ppm.

<sup>13</sup>C NMR (101 MHz, CDCl<sub>3</sub>) δ = 191.0, 172.0, 160.6, 140.6, 136.5, 135.7, 132.9, 132.6, 129.6, 129.4, 127.9(3), 127.9(1), 125.3, 121.2, 73.8, 52.3, 40.2 ppm.

### NMR Data of Product:

<sup>1</sup>H NMR (600 MHz, CDCl<sub>3</sub>) δ = 8.12-8.10 (m, 0.94H, 6% D), 7.90-7.87 (m, 0.61H, 39% D), 7.57-7.53 (m, 0.41H, 59% D), 7.48-7.44 (m, 0.14H, 86% D), 7.44-7.40 (m, 0.84H, 16% D), 7.37-7.34 (m, 0.54H, 46% D), 7.04-7.00 (m, 0.05H, 95% D), 5.18 (s, 2H), 3.70 (s, 3H), 3.64 (s, 1.89H, 6% D) ppm.

<sup>13</sup>C NMR (125 MHz, CDCl<sub>3</sub>) δ = 191.0, 172.0, 160.6, 140.6-140.5 (1C), 136.4-136.3 (1C), 135.7-135.6 (1C), 132.9-132.8 (1C), 132.7-132.6(1C), 129.6-129.5 (1C), 129.3-129.2 (1C), 127.9-127.8 (2C), 125.3, 121.2-120.7 (1C), 73.7(4)-73.6(9)(1C), 52.2, 40.2-40.1(1C) ppm.

### Mass Data:

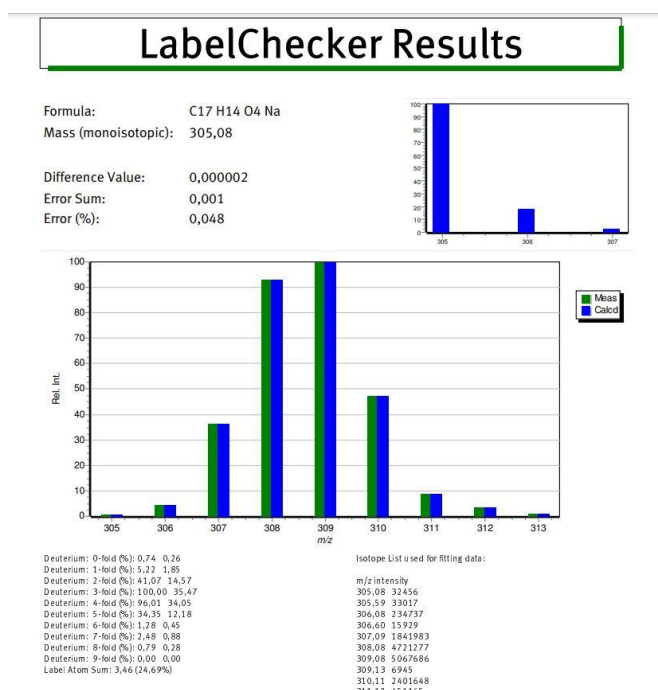

**<sup>1</sup>H-NMR spectrum in CDCl<sub>3</sub>:**

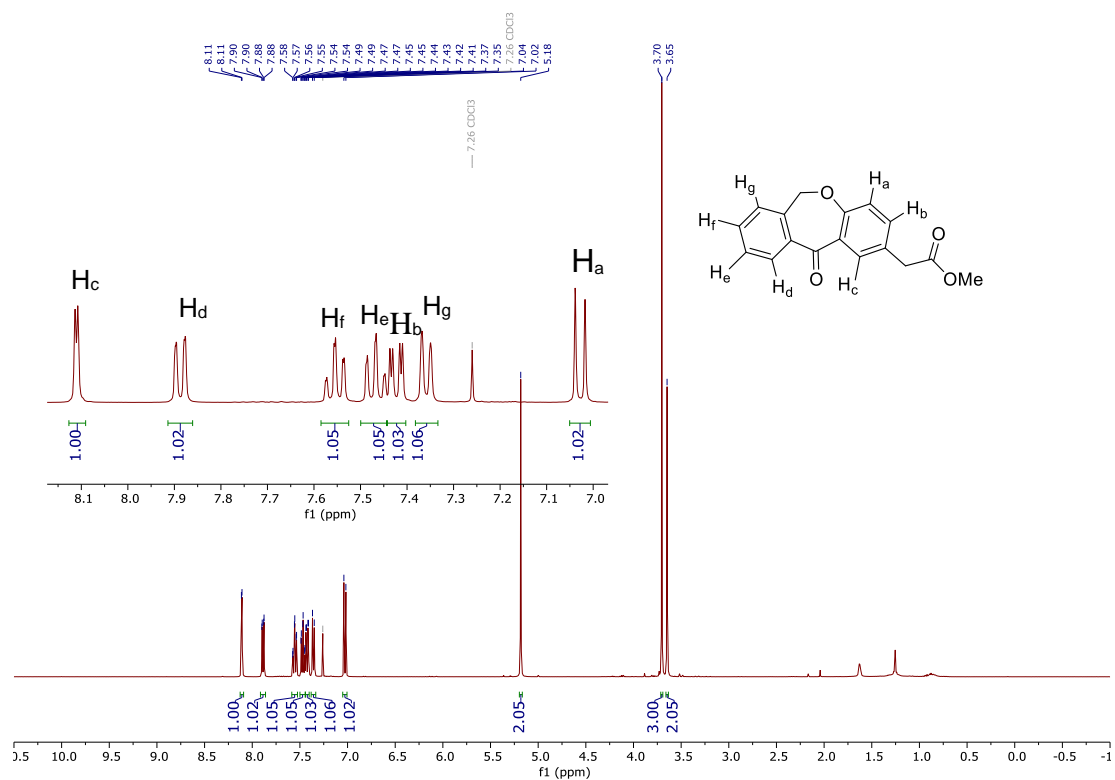

**<sup>1</sup>H-NMR spectrum in CDCl<sub>3</sub>:**

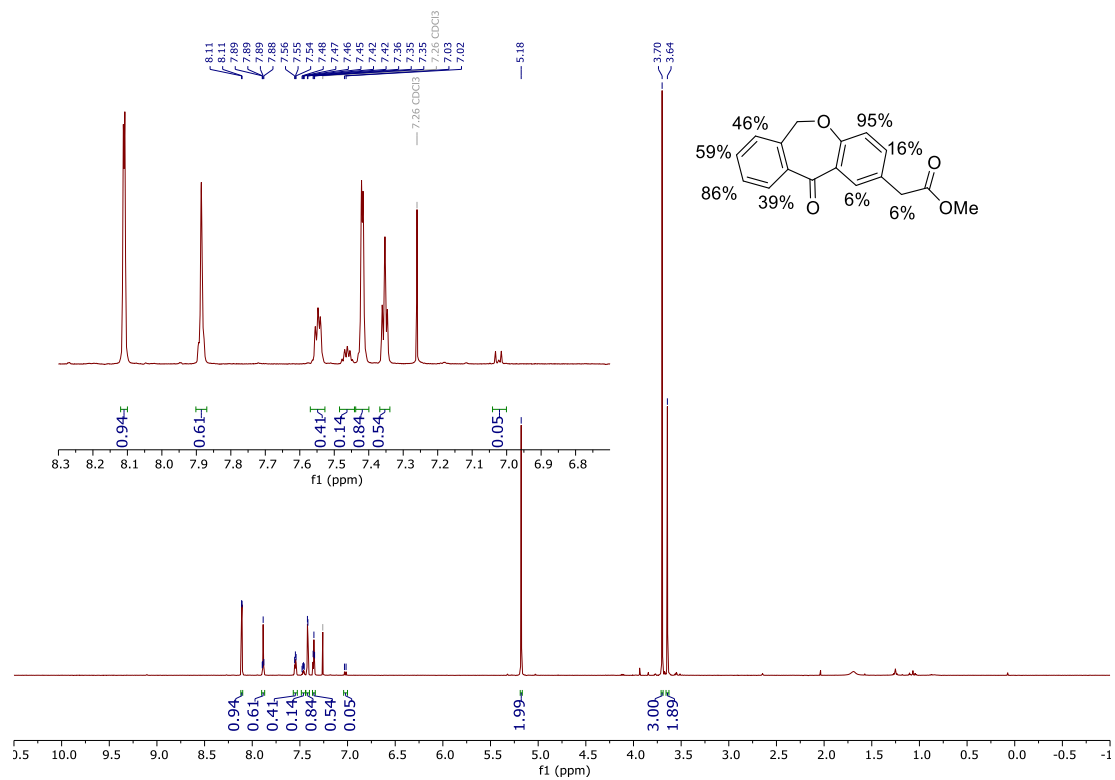

### <sup>13</sup>C-NMR spectrum in CDCl<sub>3</sub>:

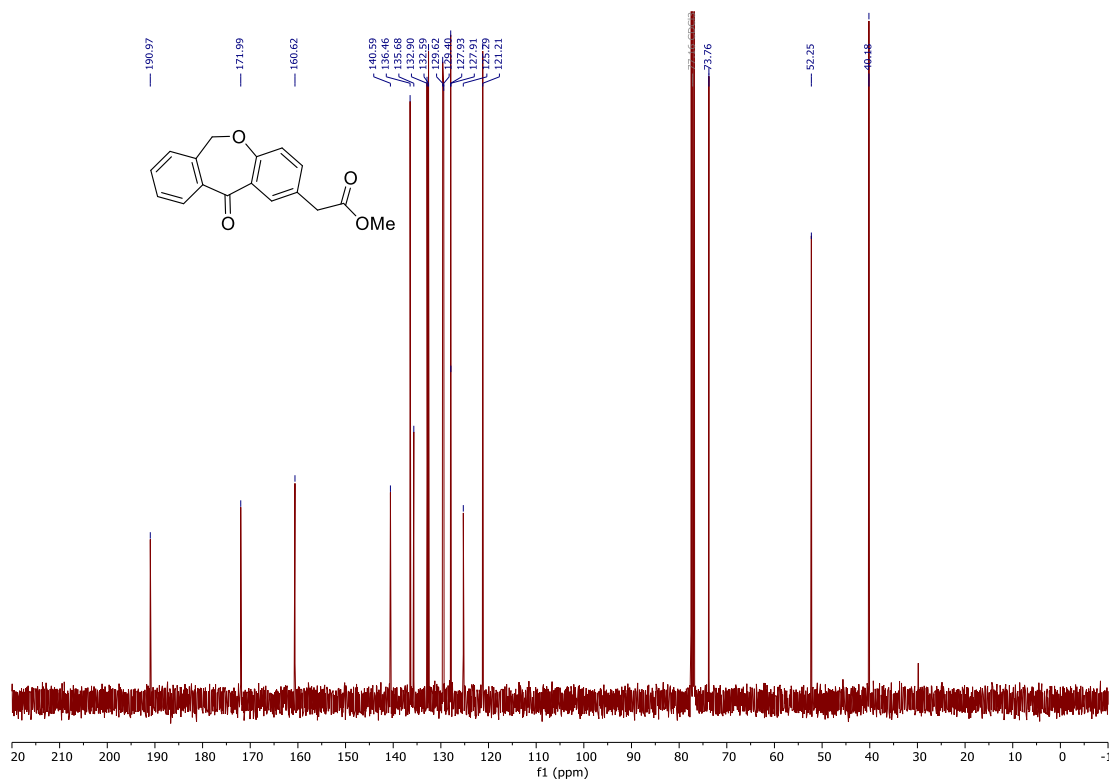

### <sup>13</sup>C-NMR spectrum in CDCl<sub>3</sub>:

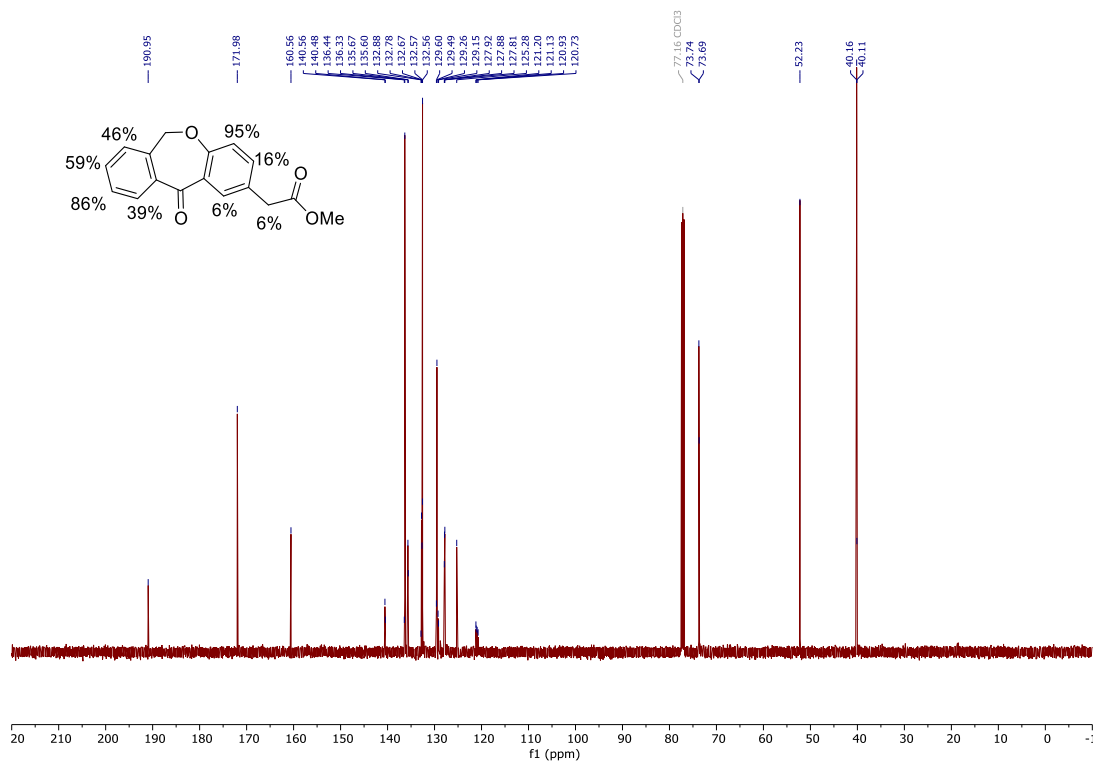

## Deuteration of (1*S*,2*R*,5*R*)-5-isopropyl-2-methylcyclohexyl thiophene-3-carboxylate (**40**):

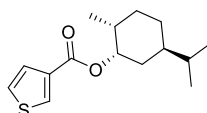

Following the general procedure F and using (1*S*,2*R*,5*R*)-5-isopropyl-2-methylcyclohexyl thiophene-3-carboxylate (**40**) (53.3 mg, 0.200 mmol), and purification via silica gel column chromatography using pentane:EtOAc = 100:1 as the eluent, the target compound [**D**]40 was obtained as a colorless liquid (44.9 mg, 83%). The degree of deuteration was determined by mass spectrometry.

**Deuterium Incorporation:** 2.86 D/molecule [HRMS]; 2.85 D/molecule [<sup>1</sup>H-NMR].

### NMR Data of Starting Material:

<sup>1</sup>H NMR (500 MHz, CDCl<sub>3</sub>) δ = 8.08 (dd, *J* = 3.1, 1.2 Hz, 1H), 7.52 (dd, *J* = 5.1, 1.2 Hz, 1H), 7.29 (dd, *J* = 5.1, 3.1 Hz, 1H), 4.87 (td, *J* = 10.9, 4.4 Hz, 1H), 2.11 (dddd, *J* = 12.0, 4.2, 3.5, 1.8 Hz, 1H), 1.94 (ttd, *J* = 7.0, 7.0, 2.8 Hz, 1H), 1.75 – 1.67 (m, 2H), 1.61 – 1.46 (m, 2H), 1.17–1.06 (m, 2H), 0.98–0.89 (m, 1H), 0.93 (d, *J* = 6.8 Hz, 3H), 0.92 (d, *J* = 7.0 Hz, 3H), 0.82 (d, *J* = 6.9 Hz, 3H) ppm.

<sup>13</sup>C NMR (126 MHz, CDCl<sub>3</sub>): δ = 162.5, 134.5, 132.4, 128.1, 125.9, 74.7, 47.4, 41.1, 34.4, 31.6, 26.7, 23.8, 22.2, 20.9, 16.7 ppm.

### NMR Data of Product:

<sup>1</sup>H NMR (400 MHz, CDCl<sub>3</sub>) δ = 8.08 (s, 0.05H, 95% D), 7.52 (s, 0.05H, 95% D), 7.29 (s, 0.05H, 95% D), 4.87 (td, *J* = 10.9, 4.4 Hz, 1H), 2.11 (dddd, *J* = 12.0, 4.0, 4.0, 1.7 Hz, 1H), 1.95 (ttd, *J* = 7.0, 2.7 Hz, 1H), 1.77 – 1.66 (m, 2H), 1.60–1.46 (m, 2H), 1.19–1.04 (m, 2H), 0.99 – 0.84 (m, 1H), 0.92 (d, *J* = 6.6 Hz, 3H), 0.91 (d, *J* = 6.9 Hz, 3H), 0.80 (d, *J* = 7.0 Hz, 3H) ppm.

<sup>13</sup>C NMR (101 MHz, CDCl<sub>3</sub>) δ = 162.5, 134.4–131.8 (1C), 128.0–127.5 (1C), 125.9–125.2 (1C), 74.7, 47.4, 41.2, 34.5, 31.6, 26.7, 23.9, 22.2, 20.9, 16.7 ppm.

### Mass Data:

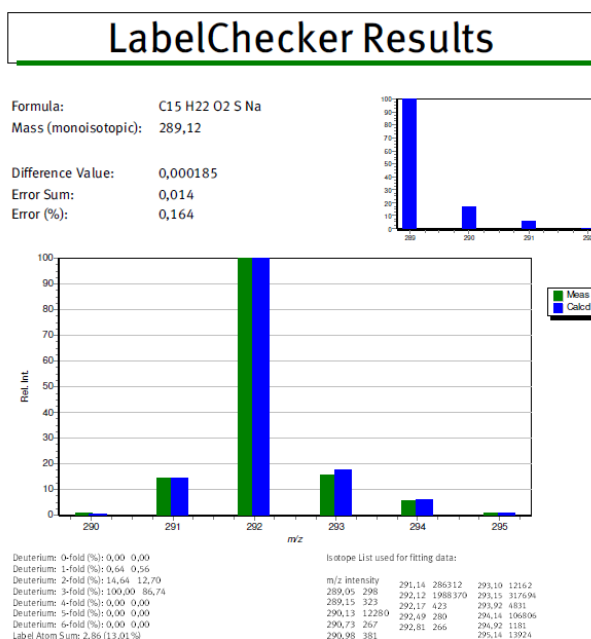



### <sup>13</sup>C-NMR spectrum in CDCl<sub>3</sub>:

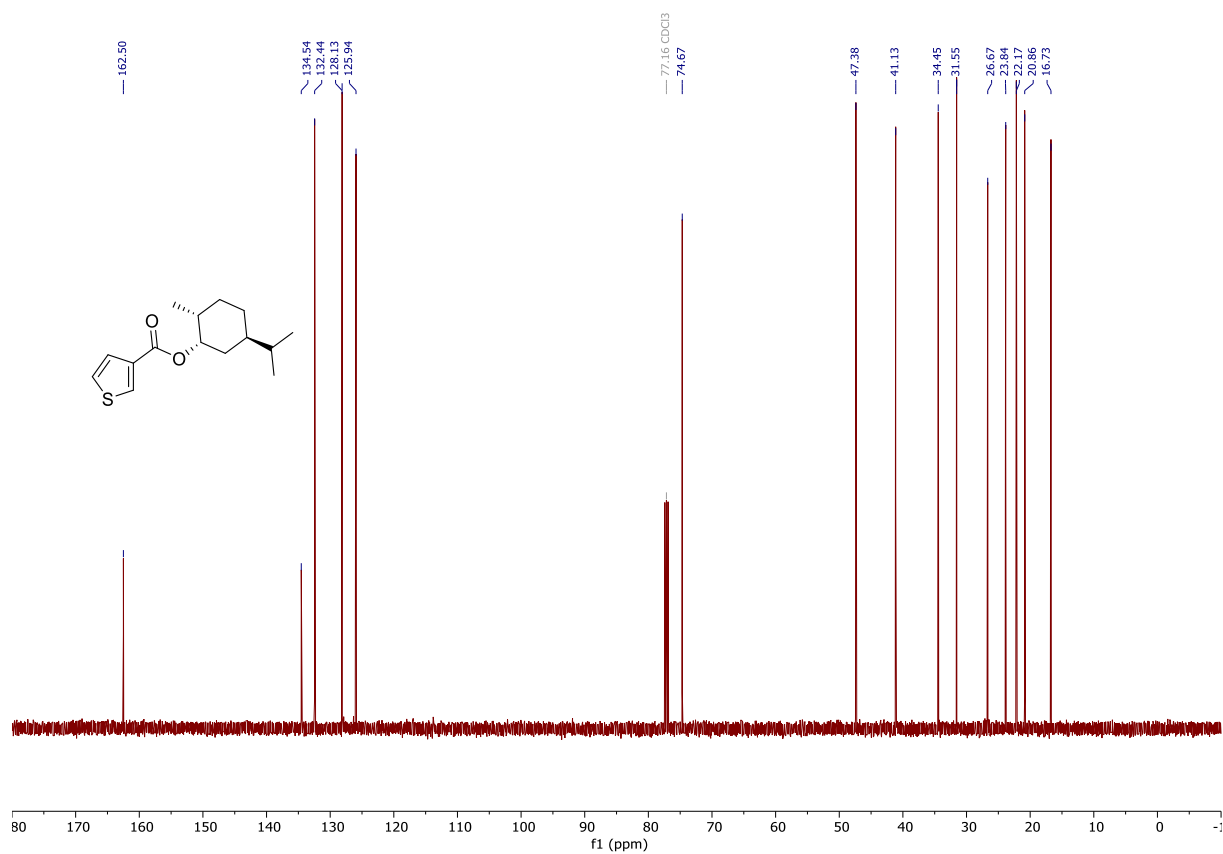

### <sup>13</sup>C-NMR spectrum in CDCl<sub>3</sub>:

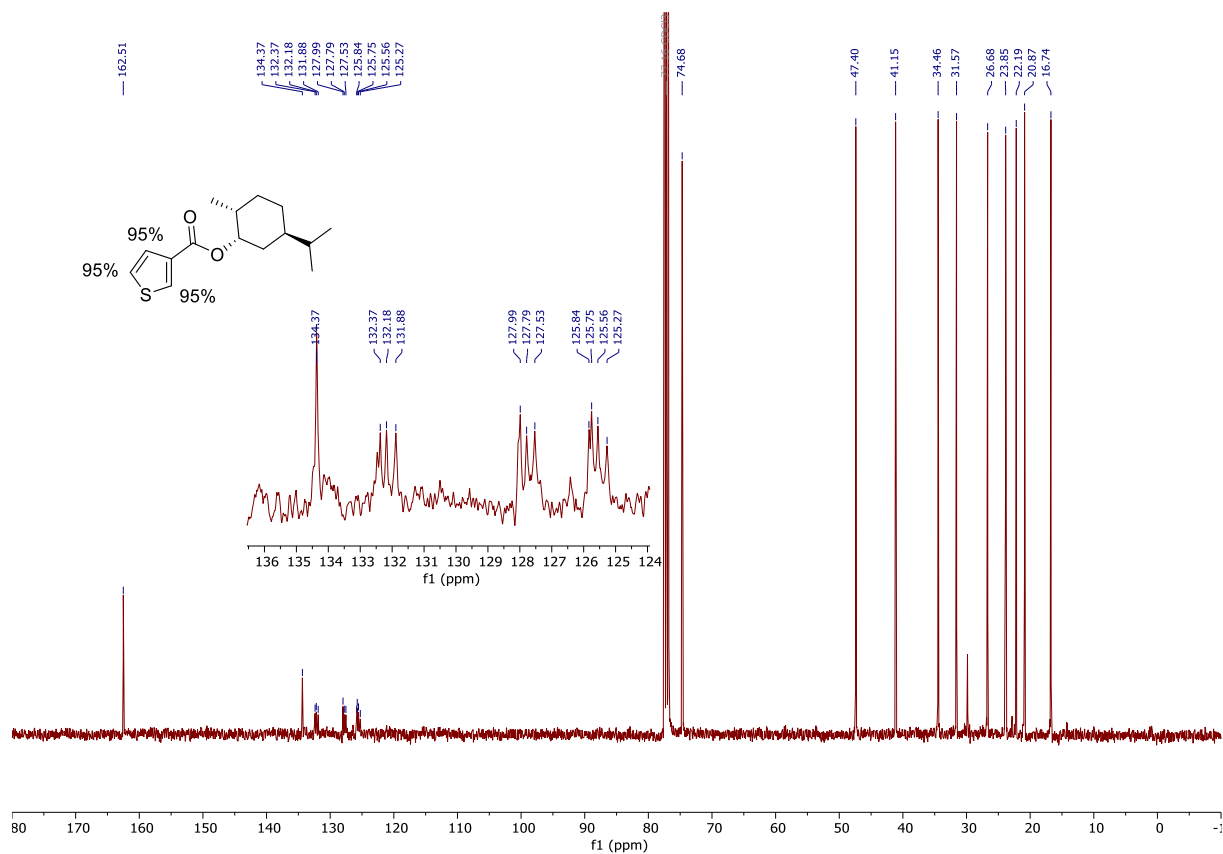



## Deuteration of methyl (1*R*,2*S*,5*R*)-2-isopropyl-5-methylcyclohexyl benzoate (**41**):

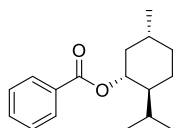

Following the general procedure F and using (1*R*,2*S*,5*R*)-2-isopropyl-5-methylcyclohexyl benzoate (**41**) (52.1 mg, 0.200 mmol), and purification via silica gel column chromatography using pentane:Et<sub>2</sub>O = 50:1 as the eluent, the target compound [**D**]**41** was obtained as colorless solid (45.5 mg, 86%). The degree of deuteration was determined by mass spectrometry.

**Deuterium Incorporation:** 4.68D/molecule [Mass]; 4.69 D/molecule [<sup>1</sup>H-NMR].

### NMR Data of Starting Material:

<sup>1</sup>H NMR (400 MHz, CDCl<sub>3</sub>) δ = 8.07-8.01 (m, 2H), 7.58-7.52 (m, 1H), 7.48-7.40 (m, 2H), 4.94 (td, *J* = 10.9, 4.4 Hz, 1H), 2.25-2.06 (m, 1H), 2.06-1.90 (m, 1H), 1.80-1.68 (m, 2H), 1.65-1.48 (m, 2H), 1.21-1.04 (m, 2H), 0.93 (dd, *J* = 6.8, 4.4 Hz, 7H), 0.80 (d, *J* = 7.0 Hz, 3H) ppm.

<sup>13</sup>C NMR (101 MHz, CDCl<sub>3</sub>) δ = 166.3, 132.8, 131.1, 129.7, 128.4, 75.0, 47.5, 41.1, 34.5, 31.6, 26.7, 23.8, 22.2, 20.9, 16.7 ppm.

### NMR Data of Product:

<sup>1</sup>H NMR (400 MHz, CDCl<sub>3</sub>) δ = 8.05 (s, 0.15H, 92.5% D), 7.55 (s, 0.06H, 94% D), 7.44 (s, 0.11H, 94.5% D), 4.94 (td, *J* = 10.9, 4.4 Hz, 1H), 2.17-2.09 (m, 1H), 1.97 (pd, *J* = 7.0, 2.8 Hz, 1H), 1.79-1.68 (m, 2H), 1.65-1.48 (m, 2H), 1.21-1.04 (m, 2H), 1.01-0.84 (m, 7H), 0.80 (d, *J* = 7.0 Hz, 3H) ppm.

<sup>13</sup>C NMR (101 MHz, CDCl<sub>3</sub>) δ = 166.2, 133.1-131.5 (1C), 130.9, 129.9-128.7 (2C), 128.6-127.3 (2C), 74.9, 47.4, 41.1, 34.5, 31.6, 26.6, 23.8, 22.2, 20.9, 16.7 ppm.

### Mass Data:

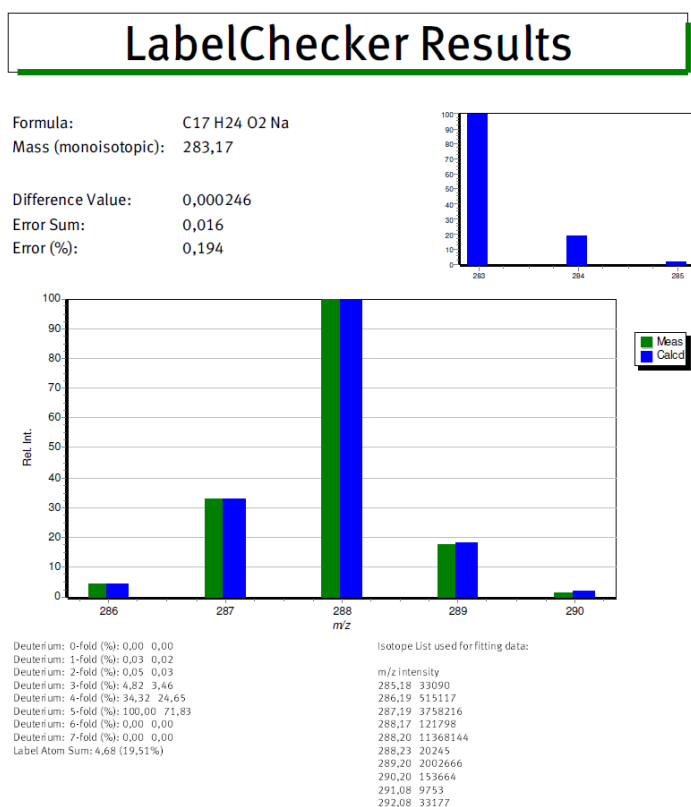



**<sup>13</sup>C-NMR spectrum in CDCl<sub>3</sub>:**

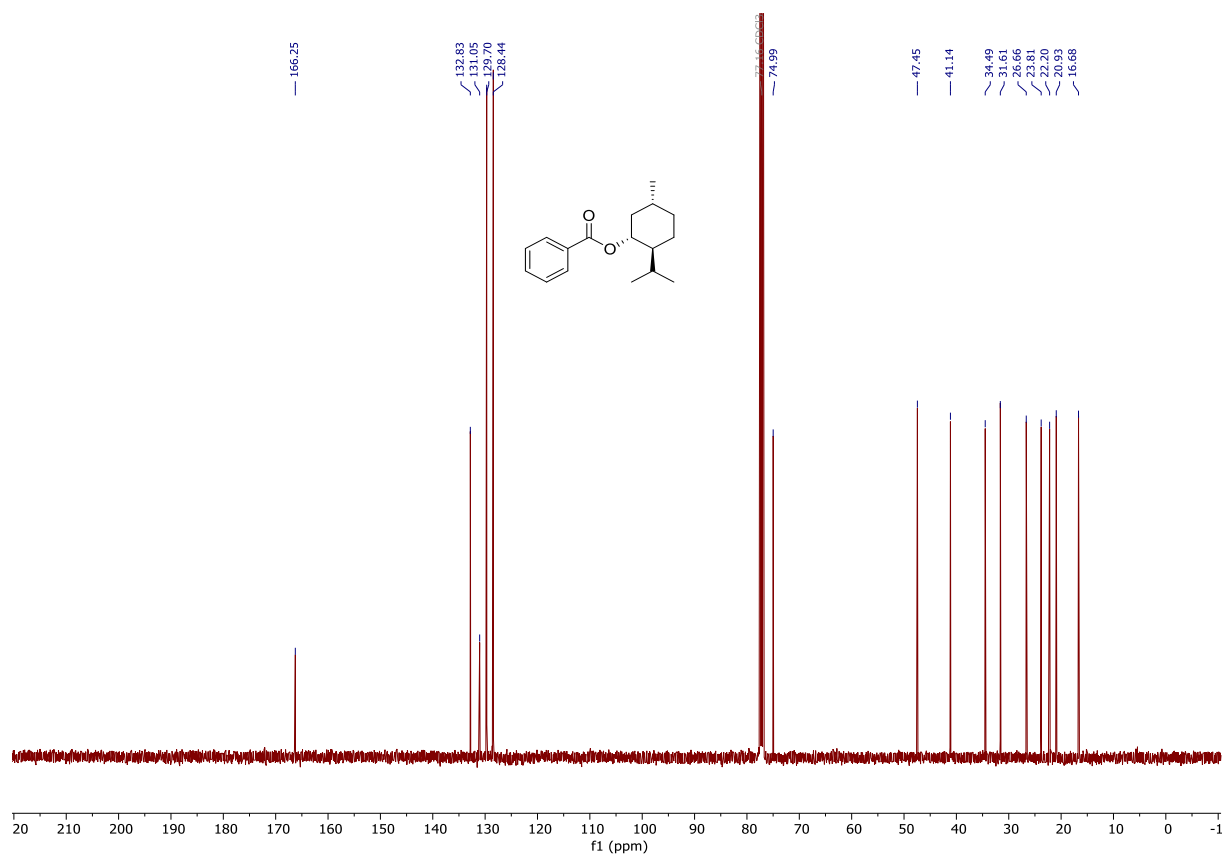

**<sup>13</sup>C-NMR spectrum in CDCl<sub>3</sub>:**

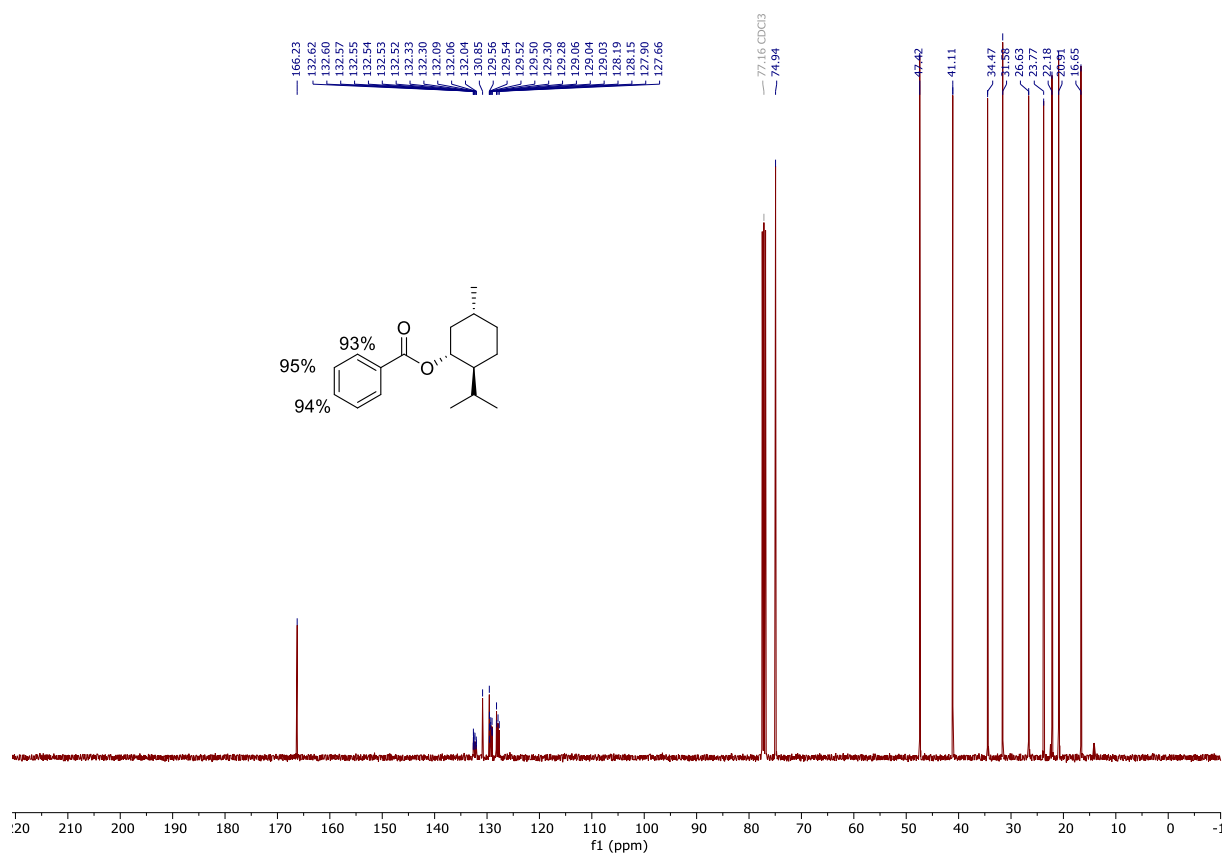

## Deuteration of methyl *N*-(2,6-dimethylphenyl)-*N*-(2-phenylacetyl)alaninate (**42**):

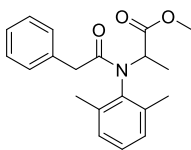

Following the general procedure F and using methyl *N*-(2,6-dimethylphenyl)-*N*-(2-phenylacetyl)alaninate (**42**) (65.1 mg, 0.200 mmol), and purification via silica gel column chromatography using pentane:EtOAc = 80:20 as the eluent, the target compound [**D**]42 was obtained as colorless liquid (63.0 mg, 95%). The degree of deuteration was determined by mass spectrometry.

**Deuterium Incorporation:** 7.70 D/molecule [Mass]; 7.60 D/molecule [<sup>1</sup>H-NMR].

### NMR Data of Starting Material:

<sup>1</sup>H NMR (600 MHz, CDCl<sub>3</sub>): δ = 7.24-7.20 (m, 1H), 7.20-7.15 (m, 4H), 7.06-7.03 (m, 1H), 6.97-6.92 (m, 2H), 4.44 (q, *J* = 7.4 Hz, 1H), 3.78 (s, 3H), 3.37-3.18 (m, 2H), 2.40 (s, 3H), 1.88 (s, 3H), 0.99 (d, *J* = 7.4 Hz, 3H) ppm.

<sup>13</sup>C NMR (126 MHz, CDCl<sub>3</sub>) δ = 173.3, 171.9, 139.0, 138.1, 137.4, 134.4, 129.5, 129.3, 128.9, 128.7, 128.3, 126.9, 55.7, 52.2, 41.3, 18.8, 18.2, 15.2 ppm.

### NMR Data of Product:

<sup>1</sup>H NMR (600 MHz, CDCl<sub>3</sub>) δ = 7.23-7.20 (m, 0.05H, 95% D), 7.19-7.15 (m, 0.20H, > 85% D), 7.06-7.03 (m, 0.05H, 95% D), 6.95-6.92 (m, 0.1H, 95% D) 4.44 (q, *J* = 7.4 Hz, 1H), 3.78 (s, 3H), 3.37-3.18 (m, 1.90H, 5% D), 2.40 (s, 3H), 1.87 (s, 3H), 0.99 (d, *J* = 7.4 Hz, 3H) ppm.

<sup>13</sup>C NMR (126 MHz, CDCl<sub>3</sub>) δ = 173.2, 171.9, 138.8, 137.9, 137.3, 134.1, 129.3-127.6 (7C), 126.6-126.1 (1C), 55.6, 52.2, 41.2-41.1(1C), 18.7(4)-18.6(8)(1C), 18.2-18.1(1C), 15.2 ppm.

### Mass Data:

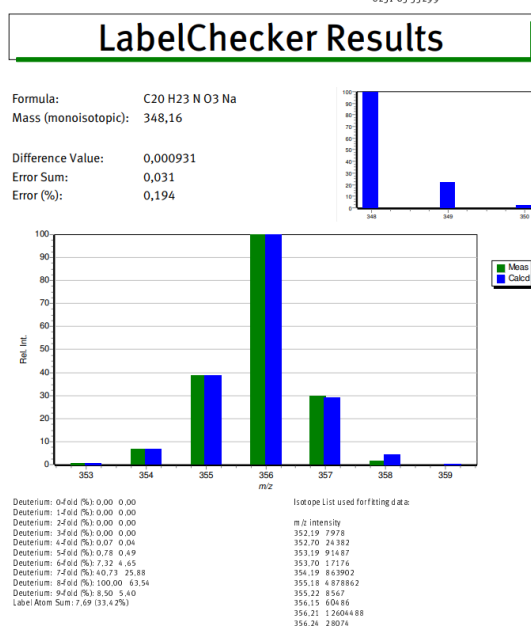

### <sup>1</sup>H-NMR spectrum in CDCl<sub>3</sub>:

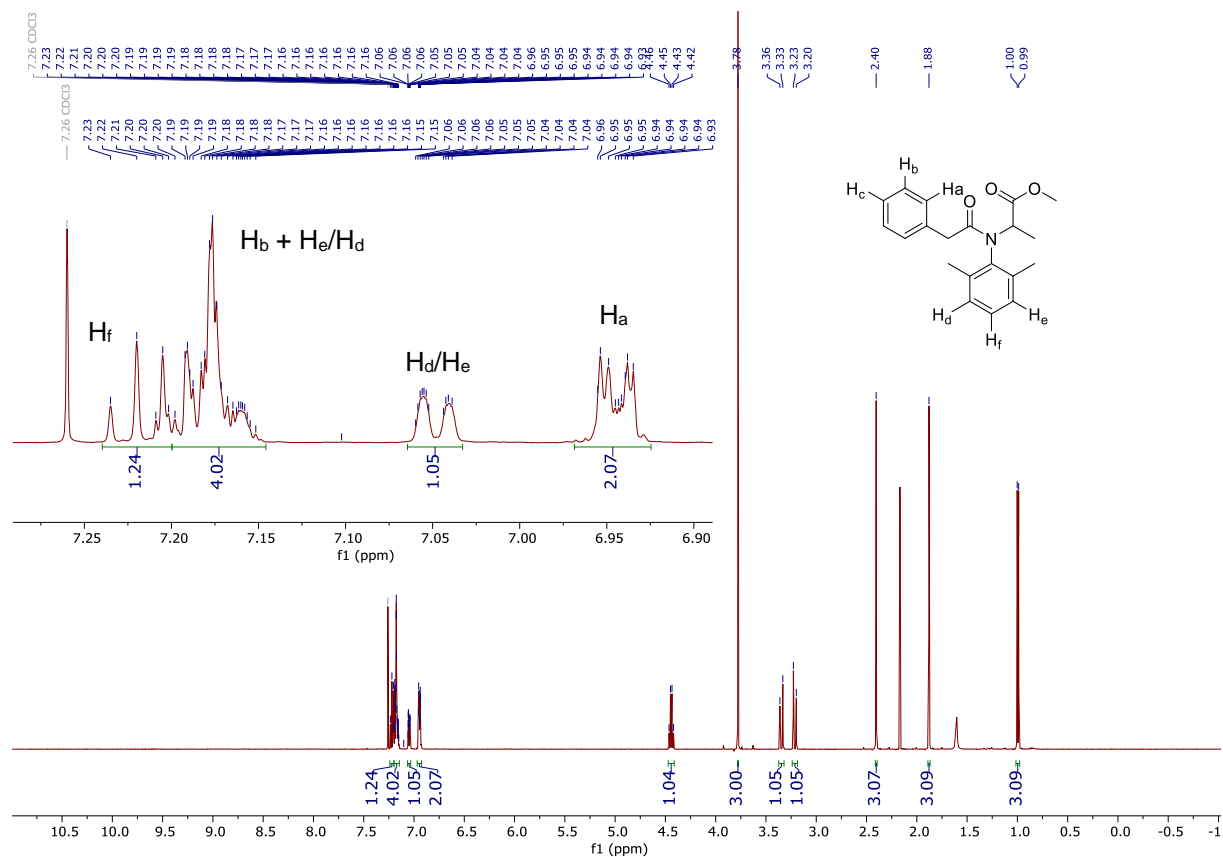

### <sup>1</sup>H-NMR spectrum in CDCl<sub>3</sub>:

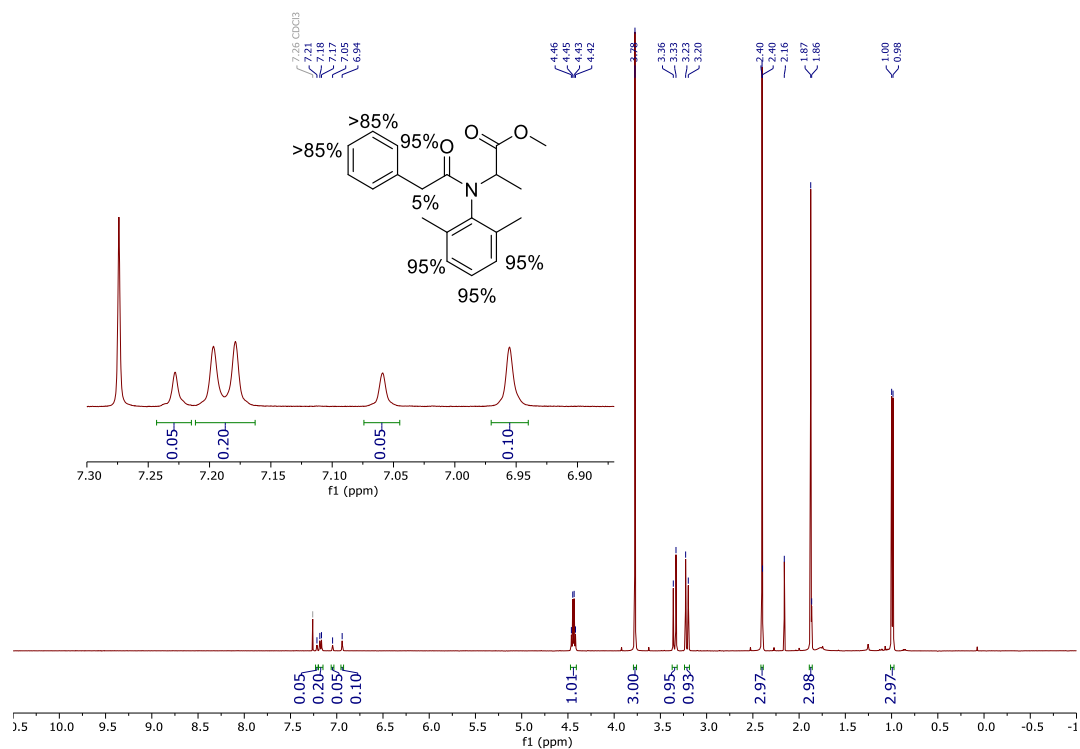

### <sup>13</sup>C-NMR spectrum in CDCl<sub>3</sub>:

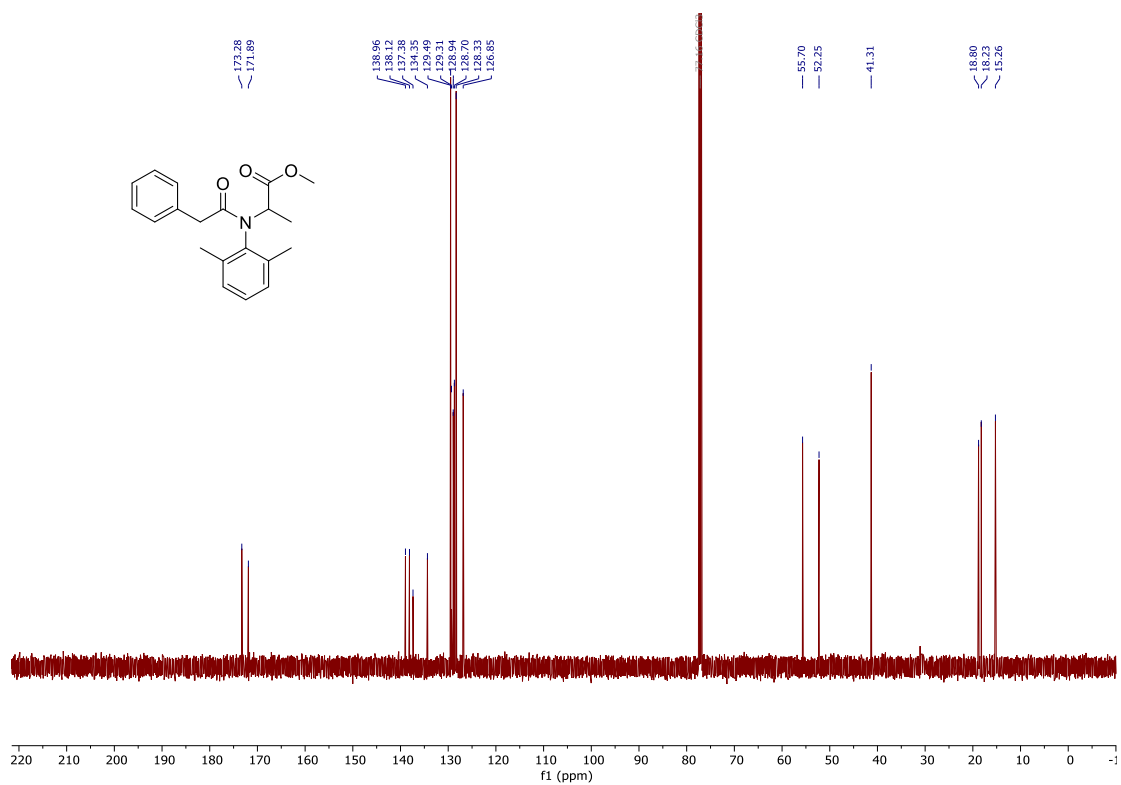

### <sup>13</sup>C-NMR spectrum in CDCl<sub>3</sub>:

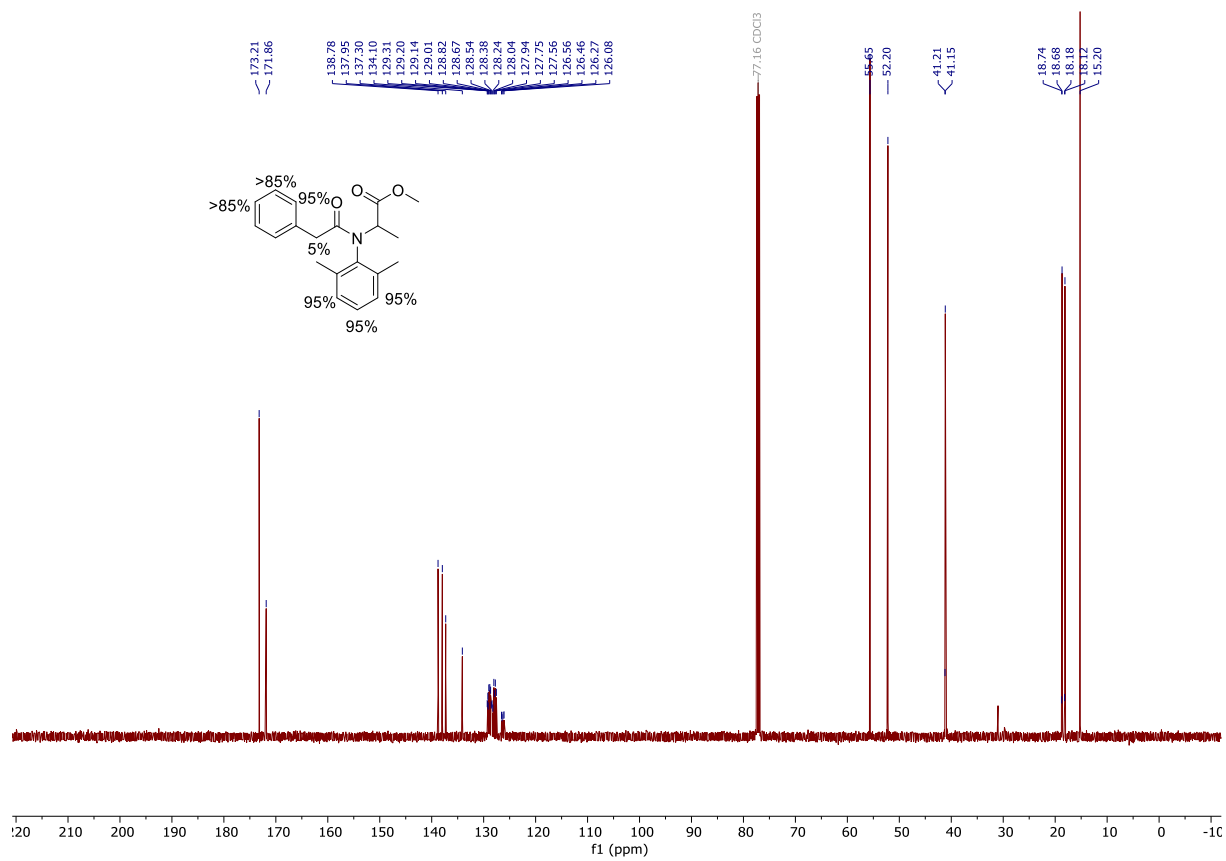

## Deuteration of methyl 5,6,7,8-tetrahydronaphthalene-1-carboxylate (**43**):

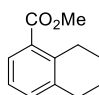

Following the general procedure F and using methyl 5,6,7,8-tetrahydronaphthalene-1-carboxylate (**43**) (38.1 mg, 0.200 mmol), and purification via silica gel column chromatography using pentane:Et<sub>2</sub>O = 50:1 as the eluent, the target compound [**D**]**43** was obtained as colorless liquid (34.9 mg, 90%). The degree of deuteration was determined by mass spectrometry.

**Deuterium Incorporation:** 2.85 D/molecule [Mass]; 2.84 D/molecule [<sup>1</sup>H-NMR].

### NMR Data of Starting Material:

<sup>1</sup>H NMR (600 MHz, CDCl<sub>3</sub>) δ = 7.65 (d, *J* = 7.7 Hz, 1H), 7.21 (d, *J* = 7.6 Hz, 1H), 7.13 (t, *J* = 7.6 Hz, 1H), 3.87 (s, 3H), 3.06 (t, *J* = 5.6 Hz, 2H), 2.82 (t, *J* = 5.6 Hz, 2H), 1.84-1.75 (m, 4H) ppm.

<sup>13</sup>C NMR (151 MHz, CDCl<sub>3</sub>) δ = 168.7, 138.7, 138.5, 133.2, 130.4, 127.9, 125.1, 51.9, 30.3, 27.9, 23.2, 22.6 ppm.

### NMR Data of Product:

<sup>1</sup>H NMR (400 MHz, CDCl<sub>3</sub>) δ = 7.65 (s, 0.05H, 95% D), 7.21 (s, 0.06H, 94% D), 7.13 (s, 0.05H, 95% D), 3.87 (s, 3H), 3.14-2.98 (m, 2H), 2.90-2.80 (m, 2H), 1.87-1.70 (m, 4H) ppm.

<sup>13</sup>C NMR (101 MHz, CDCl<sub>3</sub>) δ = 168.7, 138.7, 138.4, 133.5-131.9 (1C), 130.2, 128.3-127.0 (1C), 125.6-122.7 (1C), 51.9, 30.3, 27.9, 23.2, 22.6 ppm.

### Mass Data:

## LabelChecker Results

Formula: C<sub>12</sub>H<sub>14</sub>O<sub>2</sub>Na

Mass (monoisotopic): 213,09

Difference Value: 0,000107

Error Sum: 0,010

Error (%): 0,198

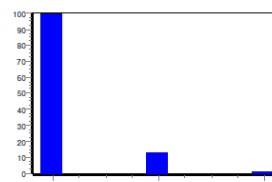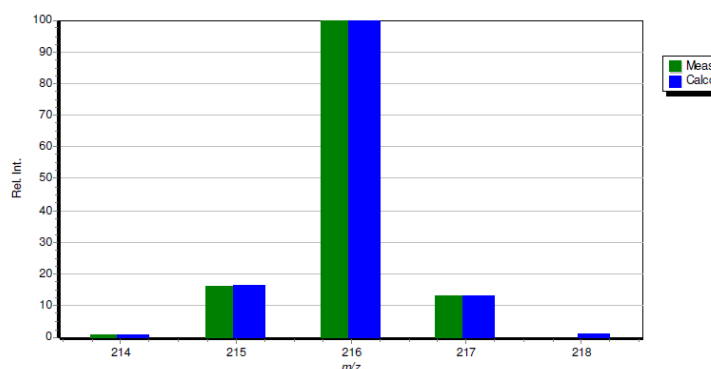

Deuterium: 0-fold (%): 0,00 0,00  
Deuterium: 1-fold (%): 0,59 0,50  
Deuterium: 2-fold (%): 16,95 14,42  
Deuterium: 3-fold (%): 100,00 85,08  
Deuterium: 4-fold (%): 0,00 0,00  
Label Atom Sum: 2,85 (20,33%)

Isotope List used for fitting data:

| m/z    | intensity |
|--------|-----------|
| 214,09 | 3268      |
| 215,06 | 1902      |
| 215,10 | 92604     |
| 215,59 | 209       |
| 216,00 | 205       |
| 216,04 | 225       |
| 216,11 | 567478    |
| 217,10 | 73596     |
| 218,11 | 1010      |

### <sup>1</sup>H-NMR spectrum in CDCl<sub>3</sub>:

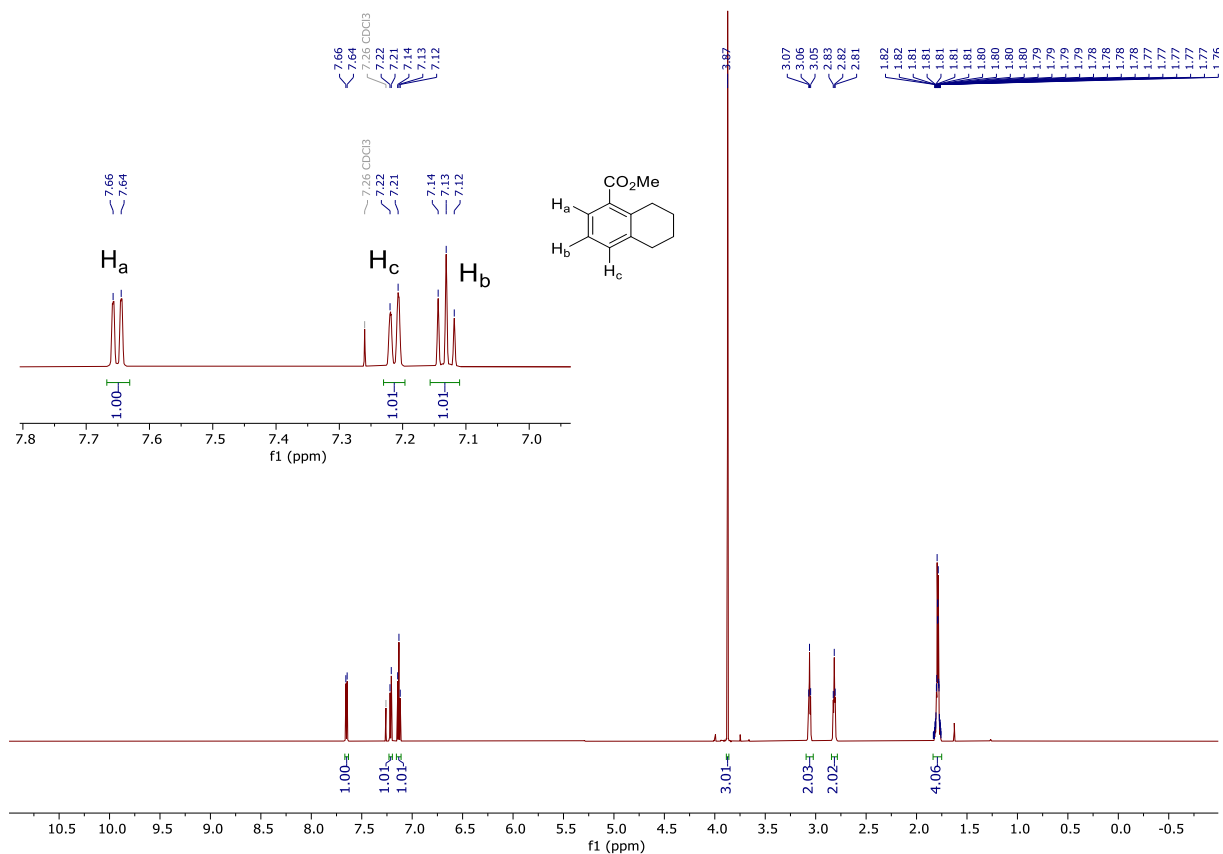

### <sup>1</sup>H-NMR spectrum in CDCl<sub>3</sub>:

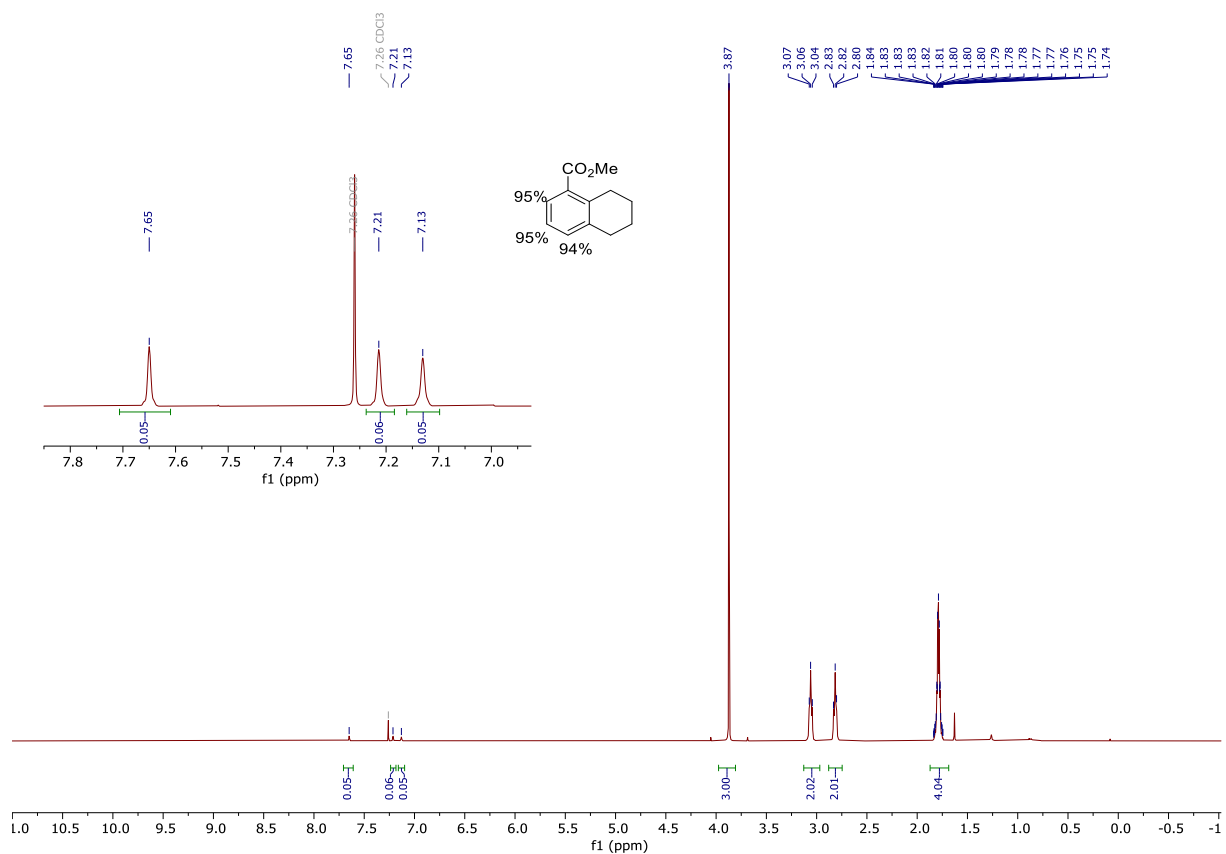



### <sup>13</sup>C-NMR spectrum in CDCl<sub>3</sub>:

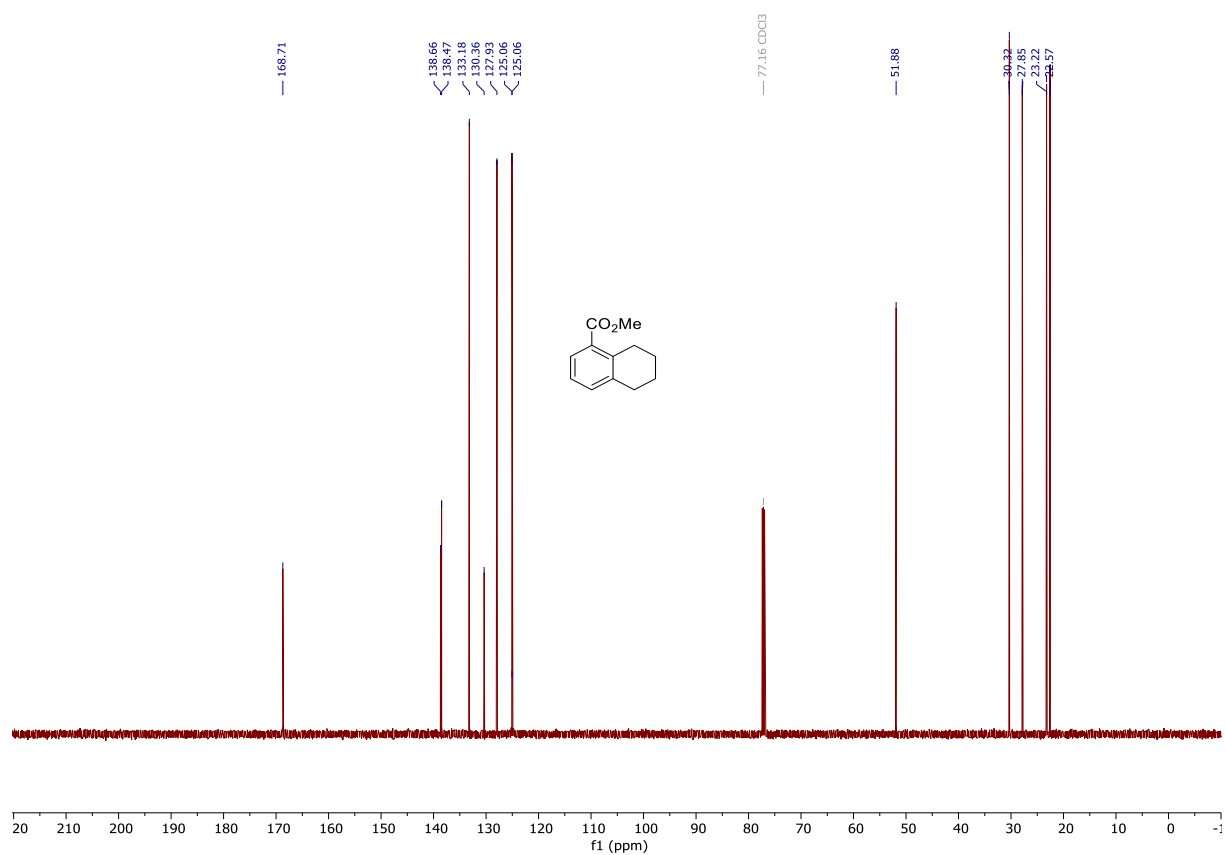

### <sup>13</sup>C-NMR spectrum in CDCl<sub>3</sub>:

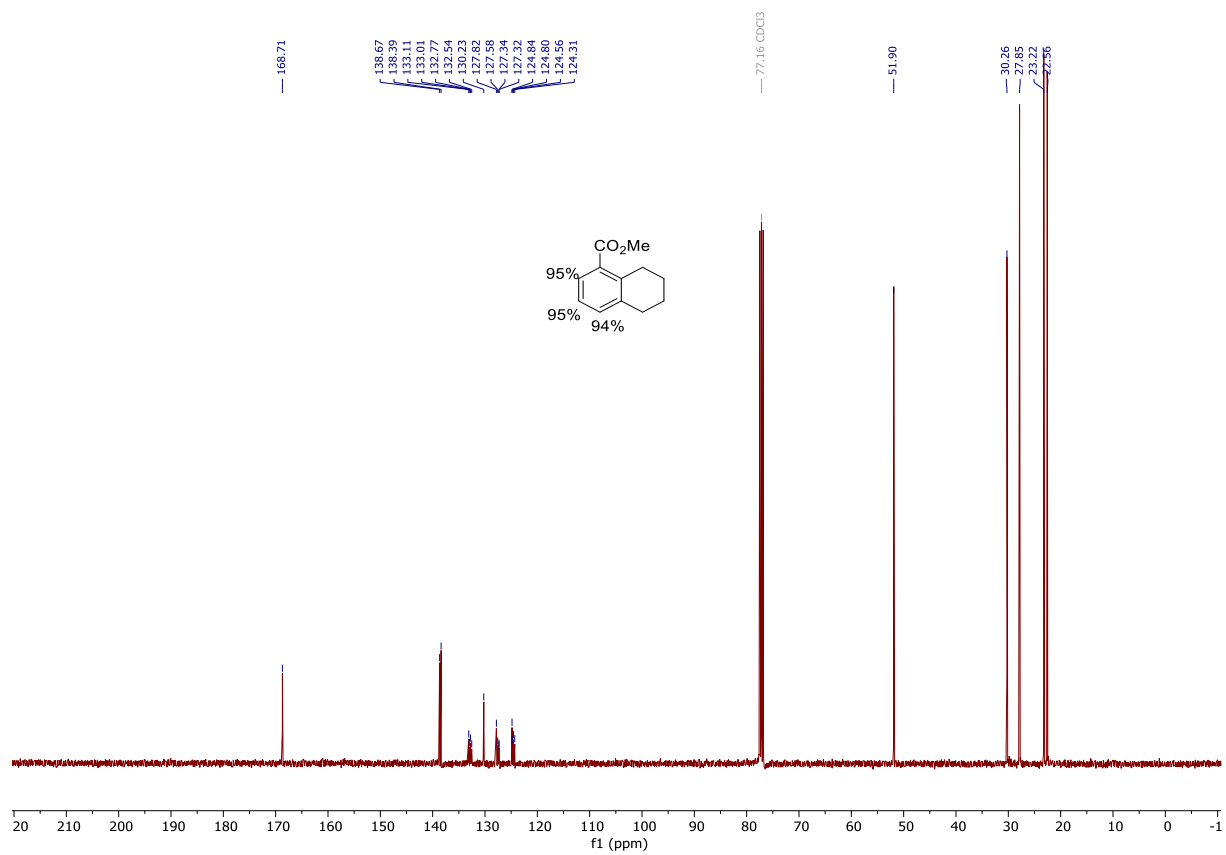

## Deuteration of 2-(cyclohexanecarbonyl)-1,2,3,6,7,11b-hexahydro-4H-pyrazino[2,1-a]isoquinolin-4-one (44):

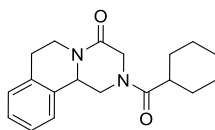

Following the general procedure F and using 2-(cyclohexanecarbonyl)-1,2,3,6,7,11b-hexahydro-4H-pyrazino[2,1-a]isoquinolin-4-one (**44**) (62.5 mg, 0.200 mmol), and purification via silica gel column chromatography using EtOAc as the eluent, the target compound [**D**]**44** was obtained as colorless solid (37.8 mg, 60%). The degree of deuteration was determined by mass spectrometry.

**Deuterium Incorporation:** 3.38 D/molecule [HRMS]; 3.33 D/molecule [<sup>1</sup>H-NMR].

### NMR Data of Starting Material:

<sup>1</sup>H NMR (400 MHz, CD<sub>3</sub>OD) δ = 7.48-7.10 (m, 4H), 5.08-4.91 (m, 1H), 4.86-4.42 (m, 3H), 4.03 (dd, *J* = 124.6, 17.8 Hz, 1H), 3.50-2.54 (m, 5H), 1.92-1.68 (m, 5H), 1.61-1.18 (m, 5H) ppm.

<sup>13</sup>C NMR (100 MHz, CD<sub>3</sub>OD) δ = 178.0, 168.6, 167.8, 137.5, 137.2, 135.1, 134.6, 131.3, 131.2, 129.6, 129.4, 128.9(5), 128.8(9), 127.6, 127.4, 57.8, 56.9, 51.0, 50.6, 50.4, 50.2, 50.0, 47.9, 47.3, 42.7, 42.4, 41.3, 41.2, 31.5, 31.2, 31.1, 30.5(1), 30.4(5), 27.9, 27.5(2), 27.4(8) ppm.\*

### NMR Data of Product:

<sup>1</sup>H NMR (400 MHz, CD<sub>3</sub>OD) δ = 7.44-7.16 (m, 0.67H, 83% D average), 5.07-4.90 (m, 1H), 4.85-4.39 (m, 3H), 4.03 (dd, *J* = 125.2, 17.8 Hz, 1H), 3.46-2.56 (m, 5H), 1.91-1.66 (m, 5H), 1.58-1.18 (m, 5H) ppm.

<sup>13</sup>C NMR (100 MHz, CD<sub>3</sub>OD) δ = 178.0, 168.6, 167.7, 137.4, 137.1, 135.4-134.2 (2C), 131.5-127.9 (6C), 127.5, 127.3, 57.7-55.7 (2H), 51.0, 50.6, 50.4, 50.2, 50.0, 47.9, 47.3, 42.6, 42.3, 41.3, 41.2, 31.5, 31.2, 31.1, 30.4(4), 30.3(8), 27.9, 27.5(1), 27.4(7) ppm.\*

\*the peaks are reported as observed.

### Mass Data:

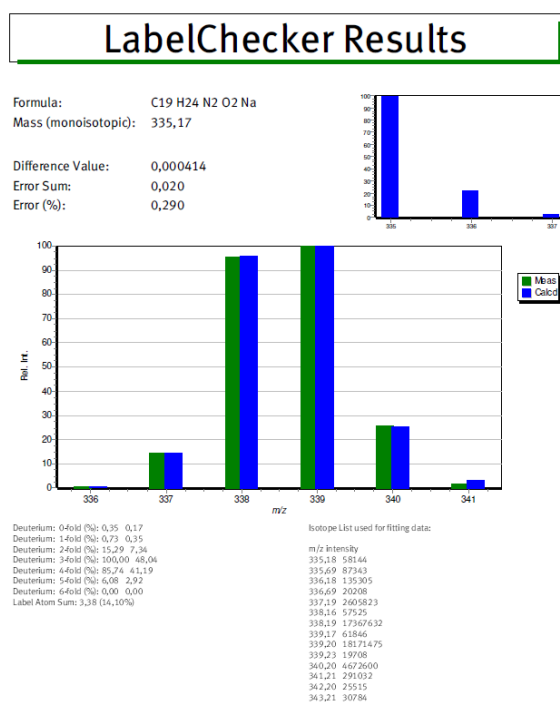



### <sup>13</sup>C-NMR spectrum in CD<sub>3</sub>OD:

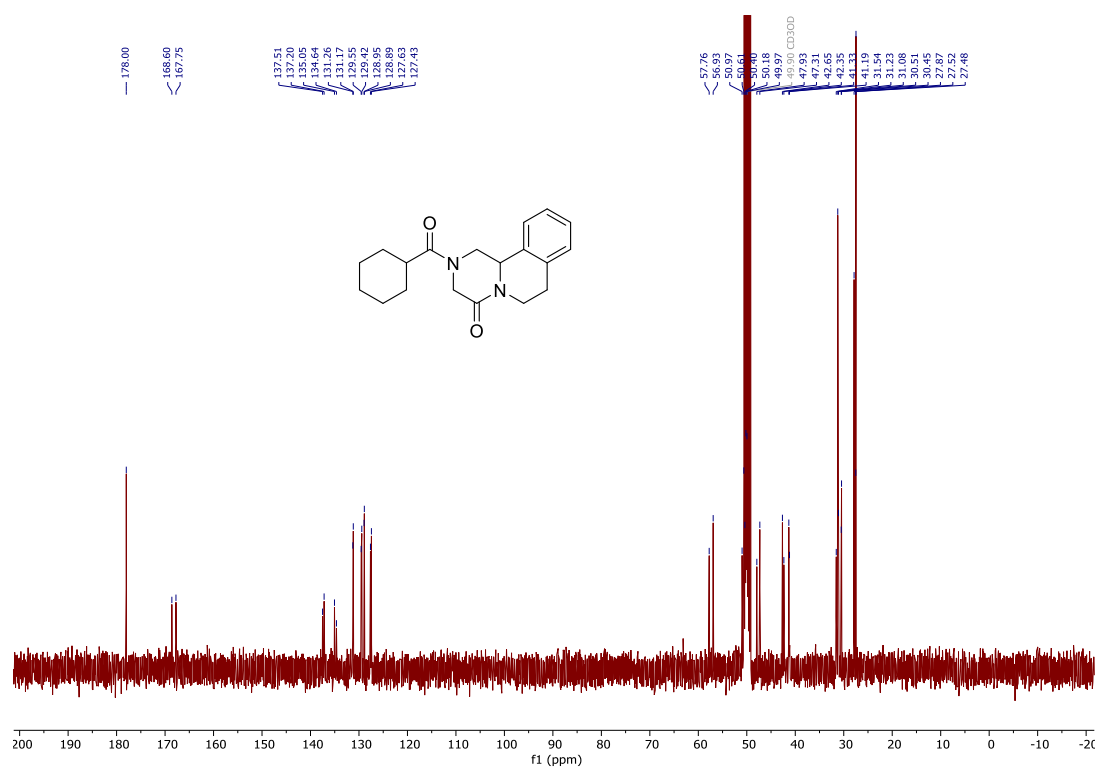

### <sup>13</sup>C-NMR spectrum in CD<sub>3</sub>OD:

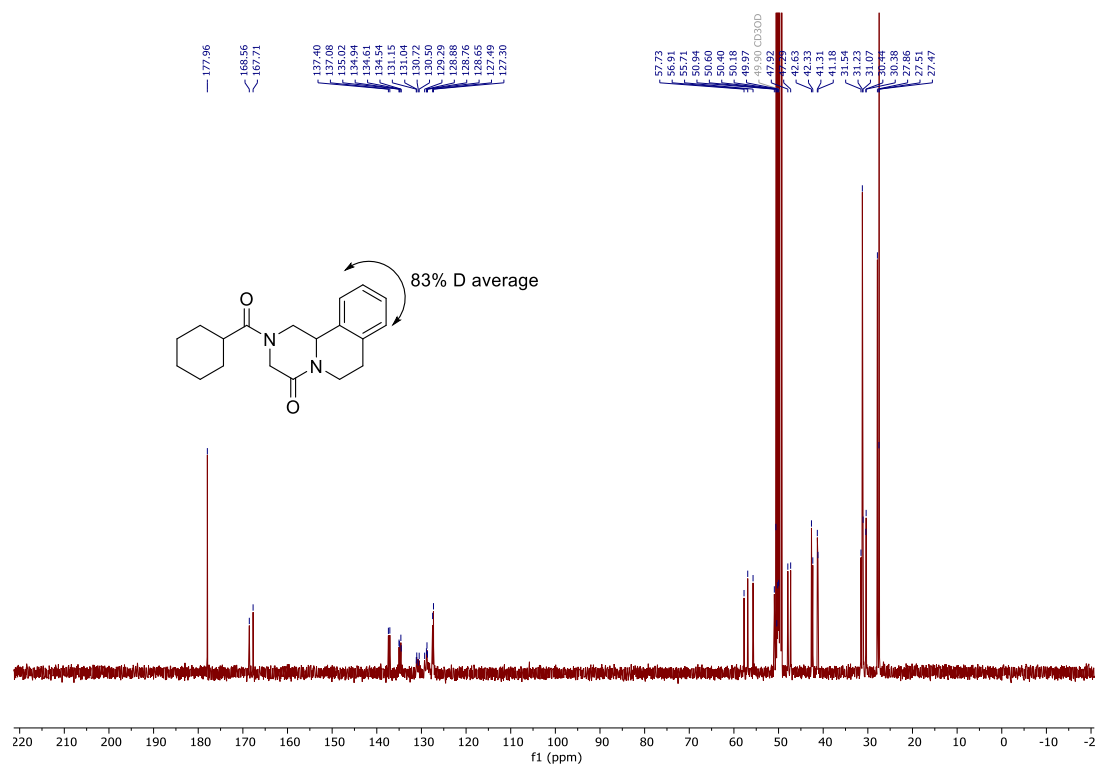

## Deuteration of (4S)-1,7,7-trimethyl-3-((Z)-4-methylbenzylidene)bicyclo[2.2.1]heptan-2-one (45):

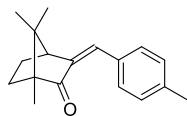

Following the general procedure F and using (4S)-1,7,7-trimethyl-3-((Z)-4-methylbenzylidene)bicyclo[2.2.1]heptan-2-one (**45**) (50.9 mg, 0.200 mmol), and purification via silica gel column chromatography using pentane:EtOAc = 40:1 as the eluent, the target compound [**D**]45 was obtained as a colorless solid (47.7 mg, 92%). The degree of deuteration was determined by mass spectrometry.

**Deuterium Incorporation:** 4.74 D/molecule [HRMS]; 4.74 D/molecule [<sup>1</sup>H-NMR].

### NMR Data of Starting Material:

<sup>1</sup>H NMR (599 MHz, CDCl<sub>3</sub>) δ = 7.38 (d, *J* = 8.1 Hz, 2H), 7.22 (s, 1H), 7.20 (d, *J* = 7.9 Hz, 2H), 3.10 (d, *J* = 4.3 Hz, 1H), 2.37 (s, 3H), 2.17 (dddd, *J* = 11.7, 11.7, 4.5, 4.5 Hz, 1H), 1.78 (ddd, *J* = 13.2, 11.3, 3.7 Hz, 1H), 1.59 (ddd, *J* = 12.2, 9.3, 3.7 Hz, 1H), 1.52 (ddd, *J* = 13.7, 9.3, 4.6 Hz, 1H), 1.03 (s, 3H), 1.00 (s, 3H), 0.80 (s, 3H) ppm.

<sup>13</sup>C NMR (101 MHz, CDCl<sub>3</sub>) δ = 208.5, 141.4, 139.1, 133.0, 129.9, 129.5, 127.7, 57.2, 49.4, 46.9, 30.9, 26.1, 21.5, 20.7, 18.5, 9.4 ppm.

### NMR Data of Product:

<sup>1</sup>H NMR (400 MHz, CDCl<sub>3</sub>) δ = 7.39 (s, 0.10H, 95%D), 7.22 (s, 0.05H, 95%D), 7.20 (s, 0.11H, 95%D), 3.10 (d, *J* = 4.2 Hz, 1H), 2.37 (s, 3H), 2.17 (dddd, *J* = 10.8, 10.8, 4.2, 4.2 Hz, 1H), 1.78 (ddd, *J* = 12.4, 12.4, 3.3 Hz, 1H), 1.58 (ddd, *J* = 12.3, 9.1, 3.6 Hz, 1H), 1.51 (ddd, *J* = 13.5, 9.3, 4.2 Hz, 1H), 1.03 (s, 3H), 1.00 (s, 3H), 0.80 (s, 3H) ppm.

<sup>13</sup>C NMR (101 MHz, CDCl<sub>3</sub>) δ = 208.5, 141.3, 138.9, 132.7, 129.9-128.8 (2C), 127.7-126.9 (1C), 57.2, 49.4, 46.9, 30.9, 26.1, 21.4, 20.7, 18.5, 9.4 ppm.

### Mass Data:

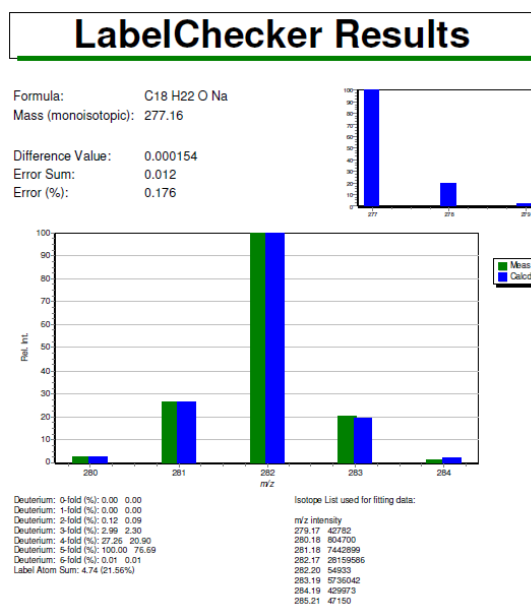

# <sup>1</sup>H-NMR spectrum in CDCl<sub>3</sub>:

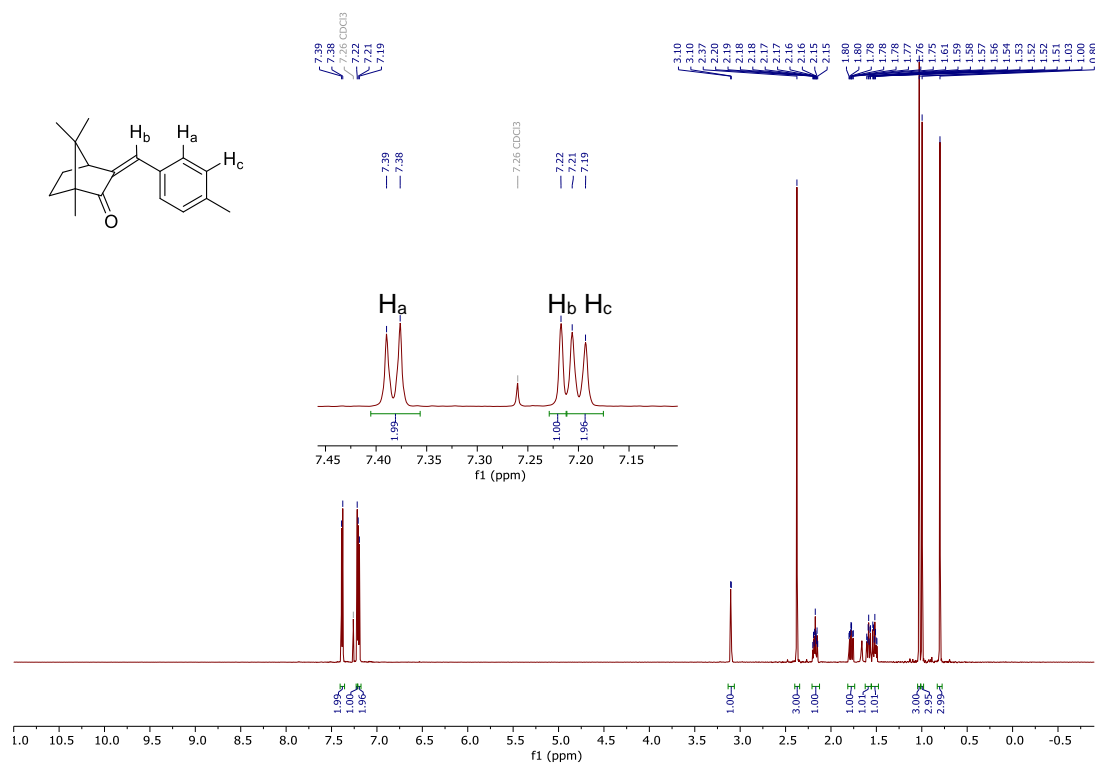

# <sup>1</sup>H-NMR spectrum in CDCl<sub>3</sub>:

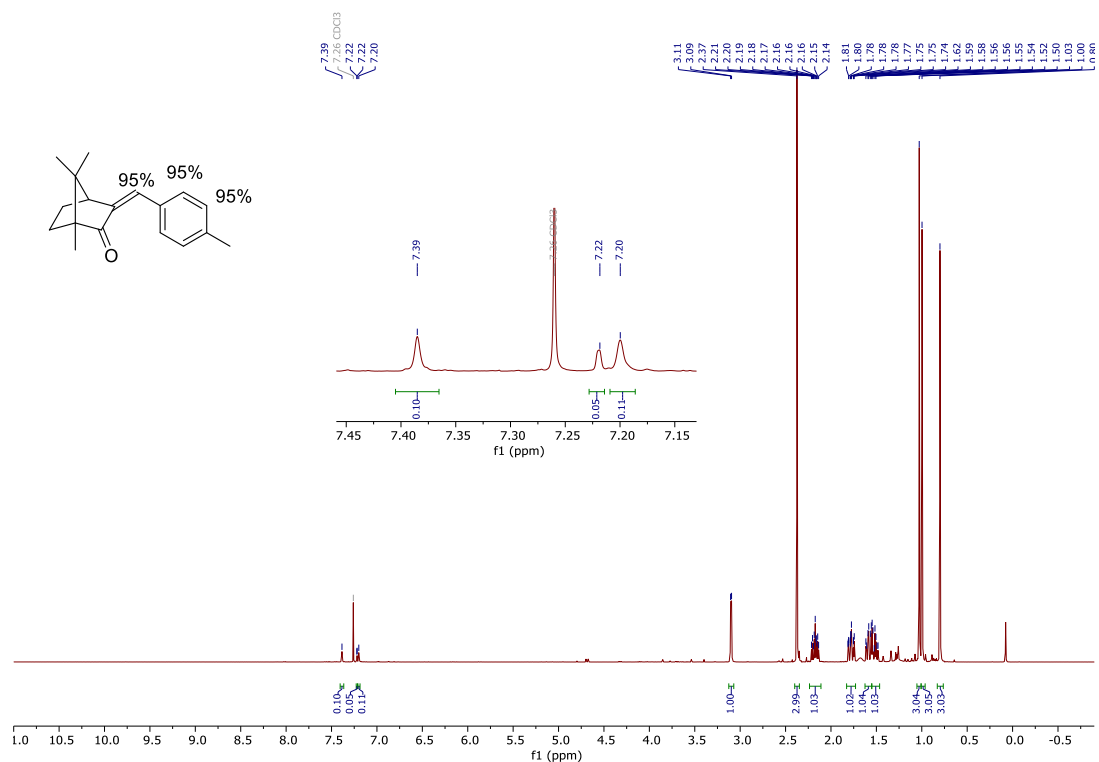

### <sup>13</sup>C-NMR spectrum in CDCl<sub>3</sub>:

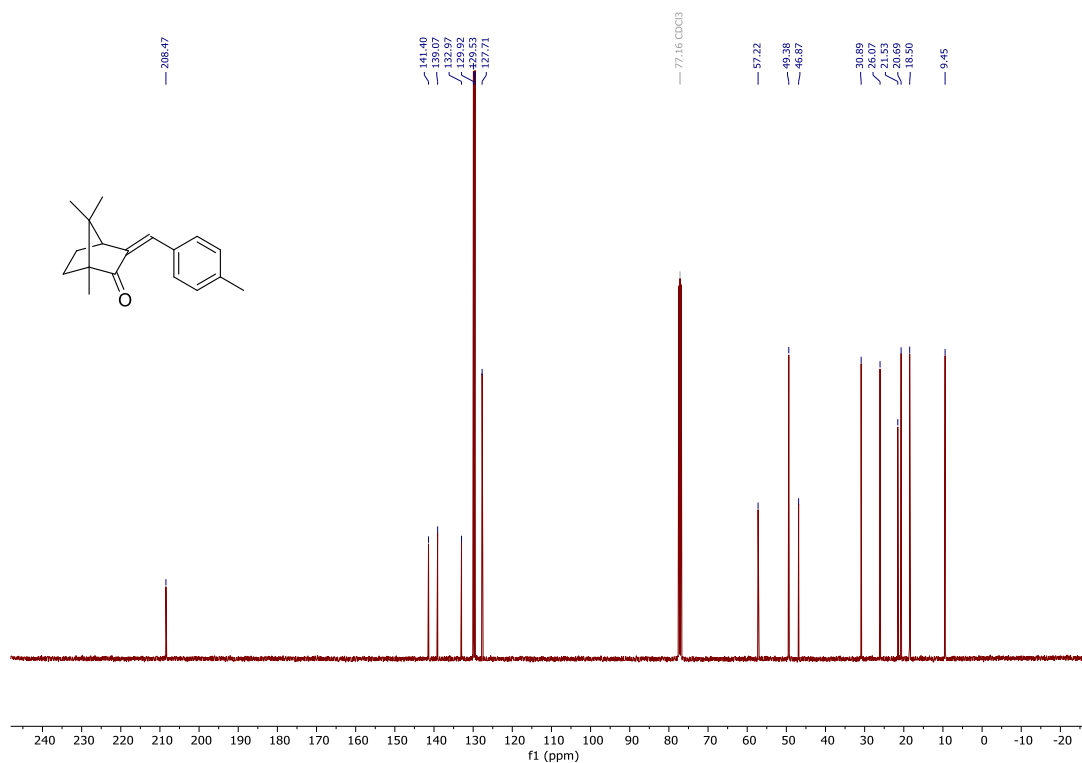

### <sup>13</sup>C-NMR spectrum in CDCl<sub>3</sub>:

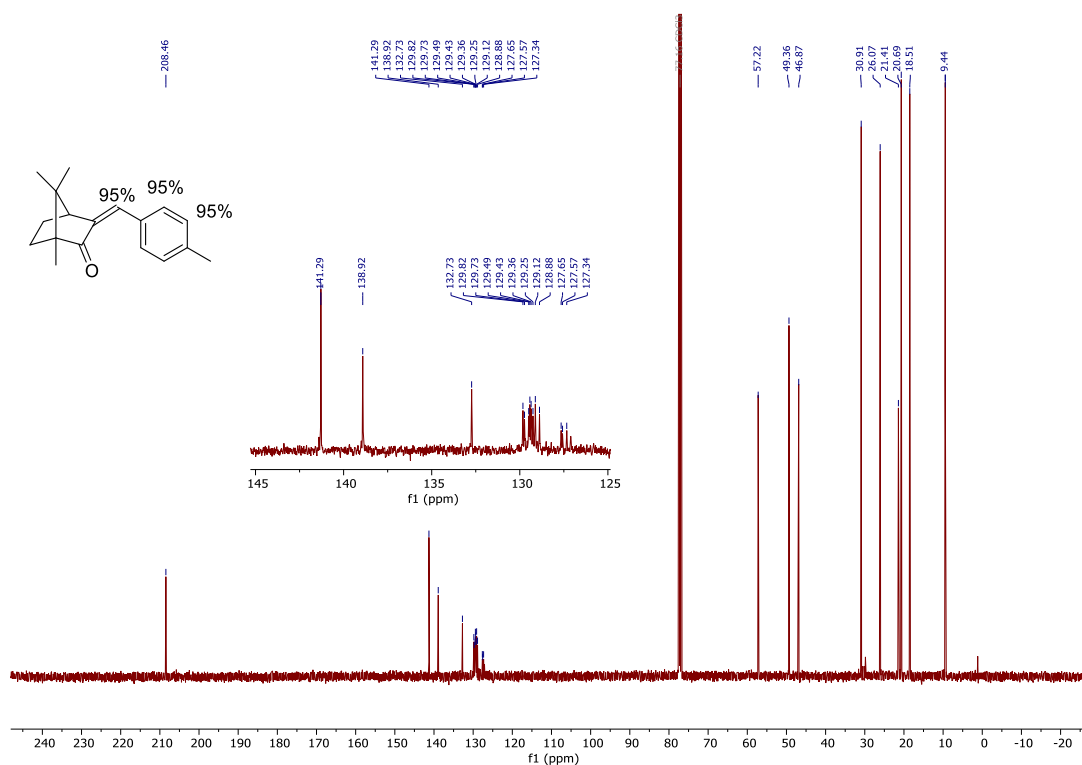

## 6. References

- (1) Fulmer, G. R.; Miller, A. J. M.; Sherden, N. H.; Gottlieb, H. E.; Nudelman, A.; Stoltz, B. M.; Bercaw, J. E.; Goldberg, K. I. NMR Chemical Shifts of Trace Impurities: Common Laboratory Solvents, Organics, and Gases in Deuterated Solvents Relevant to the Organometallic Chemist. *Organometallics* **2010**, *29*, 2176–2179, DOI: 10.1021/om100106e.
- (2) Harris, R. K.; Becker, E. D.; de Menezes, S. M. C.; Goodfellow, R.; Granger, P. NMR nomenclature. Nuclear spin properties and conventions for chemical shifts (IUPAC Recommendations 2001). *Pure Appl. Chem.* **2001**, *73*, 1795-1818, DOI: 10.1351/pac200173111795.
- (3) Weber, M.; Jautze, S.; Frey, W.; Peters, R. Bispalladacycle-Catalyzed Michael Addition of In Situ Formed Azlactones to Enones. *Chem. Eur. J.* **2012**, *18*, 14792–14804, DOI: 10.1002/chem.201202455.
- (4) Manzoni, M.R.; Zabawa, T.P.; Kasi, D; Chemler, S. R. Palladium(II)-Catalyzed Intramolecular Aminobromination and Aminochlorination of Olefins. *Organometallics* **2004**, *23*, 5618–5621, DOI: 10.1021/om049432z.
- (5) Nicolai, S.; Piemontesi, C.; Waser, J. A Palladium-Catalyzed Aminoalkynylation Strategy towards Bicyclic Heterocycles: Synthesis of ( $\pm$ )-Trachelanthamidine. *Angew. Chem., Int. Ed.* **2011**, *50*, 4680-4683, DOI: 10.1002/anie.201100718.
